# Supplementary material for: PLK1 overexpression as a dual-role biomarker and therapeutic vulnerability in pulmonary adenocarcinoma
Source: PeerJ journal article supplement (doi:10.7717/peerj.20618), 2026-01-15
Supplement: additional_files.tar [file codebook(for Fig.4A-related data_Fig.4-related data_Table1).xlsx]

## Sheet: Sheet1
Variable Name	Value	Description
event	0	live
event	1	dead
