# Supplementary material for: PLK1 overexpression as a dual-role biomarker and therapeutic vulnerability in pulmonary adenocarcinoma
Source: PeerJ journal article supplement (doi:10.7717/peerj.20618), 2026-01-15
Supplement: additional_files.tar [file Figure 1B related data.xlsx]

## Sheet: Sheet 1
sample_id	status	PLK1
TCGA-05-4244-01A-01R-1107-07	Tumor	4.26745
TCGA-05-4249-01A-01R-1107-07	Tumor	2.80387
TCGA-05-4250-01A-01R-1107-07	Tumor	5.42726
TCGA-05-4382-01A-01R-1206-07	Tumor	3.70512
TCGA-05-4384-01A-01R-1755-07	Tumor	2.09484
TCGA-05-4389-01A-01R-1206-07	Tumor	3.94462
TCGA-05-4390-01A-02R-1755-07	Tumor	5.25834
TCGA-05-4395-01A-01R-1206-07	Tumor	4.75397
TCGA-05-4396-01A-21R-1858-07	Tumor	2.98163
TCGA-05-4397-01A-01R-1206-07	Tumor	6.32535
TCGA-05-4398-01A-01R-1206-07	Tumor	5.05154
TCGA-05-4402-01A-01R-1206-07	Tumor	3.74069
TCGA-05-4403-01A-01R-1206-07	Tumor	2.83368
TCGA-05-4405-01A-21R-1858-07	Tumor	2.5901
TCGA-05-4410-01A-21R-1858-07	Tumor	3.55481
TCGA-05-4415-01A-22R-1858-07	Tumor	5.56587
TCGA-05-4417-01A-22R-1858-07	Tumor	3.43796
TCGA-05-4418-01A-01R-1206-07	Tumor	3.48486
TCGA-05-4420-01A-01R-1206-07	Tumor	4.12326
TCGA-05-4422-01A-01R-1206-07	Tumor	3.58499
TCGA-05-4424-01A-22R-1858-07	Tumor	4.35165
TCGA-05-4425-01A-01R-1755-07	Tumor	3.67831
TCGA-05-4426-01A-01R-1206-07	Tumor	2.8405
TCGA-05-4427-01A-21R-1858-07	Tumor	4.11812
TCGA-05-4430-01A-02R-1206-07	Tumor	3.76931
TCGA-05-4432-01A-01R-1206-07	Tumor	4.19152
TCGA-05-4433-01A-22R-1858-07	Tumor	4.3961
TCGA-05-4434-01A-01R-1206-07	Tumor	4.73565
TCGA-05-5420-01A-01R-1628-07	Tumor	2.93009
TCGA-05-5423-01A-01R-1628-07	Tumor	2.99166
TCGA-05-5425-01A-02R-1628-07	Tumor	4.19548
TCGA-05-5428-01A-01R-1628-07	Tumor	3.95424
TCGA-05-5429-01A-01R-1628-07	Tumor	4.02672
TCGA-05-5715-01A-01R-1628-07	Tumor	3.62821
TCGA-35-3615-01A-01R-0946-07	Tumor	1.90524
TCGA-35-4122-01A-01R-1107-07	Tumor	3.68585
TCGA-35-4123-01A-01R-1107-07	Tumor	3.53495
TCGA-35-5375-01A-01R-1628-07	Tumor	3.4223
TCGA-38-4625-01A-01R-1206-07	Tumor	6.21454
TCGA-38-4625-11A-01R-1758-07	Normal	0.731791
TCGA-38-4626-01A-01R-1206-07	Tumor	2.52857
TCGA-38-4626-11A-01R-1758-07	Normal	1.28712
TCGA-38-4627-01A-01R-1206-07	Tumor	2.87869
TCGA-38-4627-11A-01R-1758-07	Normal	1.43696
TCGA-38-4628-01A-01R-1206-07	Tumor	3.62018
TCGA-38-4629-01A-02R-1206-07	Tumor	4.98727
TCGA-38-4630-01A-01R-1206-07	Tumor	6.06927
TCGA-38-4631-01A-01R-1755-07	Tumor	5.10045
TCGA-38-4632-01A-01R-1755-07	Tumor	4.49228
TCGA-38-4632-11A-01R-1755-07	Normal	1.36424
TCGA-38-6178-01A-11R-1755-07	Tumor	3.59297
TCGA-38-7271-01A-11R-2039-07	Tumor	2.44424
TCGA-38-A44F-01A-11R-A24H-07	Tumor	2.3838
TCGA-44-2655-01A-01R-0946-07	Tumor	2.19257
TCGA-44-2655-11A-01R-1758-07	Normal	1.30987
TCGA-44-2656-01A-02R-0946-07	Tumor	3.46905
TCGA-44-2656-01A-02R-A278-07	Tumor	2.11876
TCGA-44-2656-01B-06R-A277-07	Tumor	2.02811
TCGA-44-2657-01A-01R-1107-07	Tumor	3.12073
TCGA-44-2657-11A-01R-1758-07	Normal	3.49645
TCGA-44-2659-01A-01R-0946-07	Tumor	2.57388
TCGA-44-2661-01A-01R-1107-07	Tumor	2.08165
TCGA-44-2661-11A-01R-1758-07	Normal	1.55552
TCGA-44-2662-01A-01R-0946-07	Tumor	5.56017
TCGA-44-2662-01A-01R-A278-07	Tumor	4.09362
TCGA-44-2662-01B-02R-A277-07	Tumor	3.1992
TCGA-44-2662-11A-01R-1758-07	Normal	0.759667
TCGA-44-2665-01A-01R-0946-07	Tumor	3.50833
TCGA-44-2665-01B-06R-A277-07	Tumor	2.22571
TCGA-44-2665-11A-01R-1758-07	Normal	1.31921
TCGA-44-2666-01A-01R-0946-07	Tumor	4.24124
TCGA-44-2666-01A-01R-A278-07	Tumor	2.66364
TCGA-44-2666-01B-02R-A277-07	Tumor	3.50456
TCGA-44-2668-01A-01R-0946-07	Tumor	5.78047
TCGA-44-2668-01A-01R-A278-07	Tumor	4.37102
TCGA-44-2668-01B-02R-A277-07	Tumor	3.82156
TCGA-44-2668-11A-01R-1758-07	Normal	2.13763
TCGA-44-3396-01A-01R-1206-07	Tumor	3.56238
TCGA-44-3396-11A-01R-1758-07	Normal	1.45217
TCGA-44-3398-01A-01R-1107-07	Tumor	2.29016
TCGA-44-3398-11B-01R-1758-07	Normal	1.53112
TCGA-44-3917-01A-01R-A278-07	Tumor	2.96811
TCGA-44-3917-01B-02R-A277-07	Tumor	3.49604
TCGA-44-3918-01A-01R-1107-07	Tumor	3.22137
TCGA-44-3918-01A-01R-A278-07	Tumor	1.56164
TCGA-44-3918-01B-02R-A277-07	Tumor	2.03221
TCGA-44-3919-01A-02R-1107-07	Tumor	3.59386
TCGA-44-4112-01A-01R-1107-07	Tumor	3.7986
TCGA-44-4112-01B-06R-A277-07	Tumor	1.72897
TCGA-44-5643-01A-01R-1628-07	Tumor	4.9213
TCGA-44-5644-01A-21R-2039-07	Tumor	4.37598
TCGA-44-5645-01A-01R-1628-07	Tumor	2.54614
TCGA-44-5645-01A-01R-A278-07	Tumor	1.54265
TCGA-44-5645-01B-04R-A277-07	Tumor	2.18552
TCGA-44-5645-11A-01R-1628-07	Normal	1.309
TCGA-44-6144-11A-01R-1755-07	Normal	1.32562
TCGA-44-6145-01A-11R-1755-07	Tumor	3.66125
TCGA-44-6145-11A-01R-1858-07	Normal	1.14026
TCGA-44-6146-01A-11R-1755-07	Tumor	3.28388
TCGA-44-6146-01A-11R-A278-07	Tumor	2.57061
TCGA-44-6146-01B-04R-A277-07	Tumor	2.75253
TCGA-44-6146-11A-01R-1858-07	Normal	1.15426
TCGA-44-6147-01A-11R-1755-07	Tumor	2.69586
TCGA-44-6147-01A-11R-A278-07	Tumor	1.778
TCGA-44-6147-01B-06R-A277-07	Tumor	1.2364
TCGA-44-6147-11A-01R-1858-07	Normal	1.49978
TCGA-44-6148-01A-11R-1755-07	Tumor	1.42616
TCGA-44-6148-11A-01R-1858-07	Normal	1.17938
TCGA-44-6774-01A-21R-1858-07	Tumor	3.21168
TCGA-44-6775-01A-11R-1858-07	Tumor	4.44206
TCGA-44-6775-01A-11R-A278-07	Tumor	3.99108
TCGA-44-6775-01C-02R-A277-07	Tumor	2.33362
TCGA-44-6776-01A-11R-1858-07	Tumor	2.02772
TCGA-44-6776-11A-01R-1858-07	Normal	0.943959
TCGA-44-6777-01A-11R-1858-07	Tumor	2.79467
TCGA-44-6777-11A-01R-1858-07	Normal	1.76205
TCGA-44-6778-01A-11R-1858-07	Tumor	4.50115
TCGA-44-6778-11A-01R-1858-07	Normal	1.16491
TCGA-44-6779-01A-11R-1858-07	Tumor	5.02717
TCGA-44-7659-01A-11R-2066-07	Tumor	1.75894
TCGA-44-7660-01A-11R-2066-07	Tumor	4.13523
TCGA-44-7661-01A-11R-2066-07	Tumor	5.18693
TCGA-44-7662-01A-11R-2066-07	Tumor	4.35229
TCGA-44-7667-01A-31R-2066-07	Tumor	6.2373
TCGA-44-7669-01A-21R-2066-07	Tumor	5.92182
TCGA-44-7670-01A-11R-2066-07	Tumor	6.01205
TCGA-44-7671-01A-11R-2066-07	Tumor	2.8863
TCGA-44-7672-01A-11R-2066-07	Tumor	3.29706
TCGA-44-8117-01A-11R-2241-07	Tumor	3.06908
TCGA-44-8119-01A-11R-2241-07	Tumor	3.77979
TCGA-44-8120-01A-11R-2241-07	Tumor	3.31457
TCGA-44-A479-01A-31R-A24H-07	Tumor	3.46651
TCGA-44-A47A-01A-21R-A24H-07	Tumor	4.08265
TCGA-44-A47B-01A-11R-A24H-07	Tumor	3.14112
TCGA-44-A47G-01A-21R-A24H-07	Tumor	2.95103
TCGA-44-A4SS-01A-11R-A24X-07	Tumor	3.76471
TCGA-44-A4SU-01A-11R-A24X-07	Tumor	3.07979
TCGA-49-4486-01A-01R-1206-07	Tumor	1.41164
TCGA-49-4487-01A-21R-1858-07	Tumor	4.2951
TCGA-49-4488-01A-01R-1755-07	Tumor	3.40219
TCGA-49-4490-01A-21R-1858-07	Tumor	2.98743
TCGA-49-4490-11A-01R-1858-07	Normal	1.27143
TCGA-49-4494-01A-01R-1206-07	Tumor	4.12567
TCGA-49-4501-01A-01R-1206-07	Tumor	2.18495
TCGA-49-4505-01A-01R-1206-07	Tumor	2.55528
TCGA-49-4506-01A-01R-1206-07	Tumor	4.01373
TCGA-49-4507-01A-01R-1206-07	Tumor	4.27771
TCGA-49-4510-01A-01R-1206-07	Tumor	1.42218
TCGA-49-4512-01A-21R-1858-07	Tumor	2.82615
TCGA-49-4512-11A-01R-1858-07	Normal	1.11543
TCGA-49-4514-01A-21R-1858-07	Tumor	4.22719
TCGA-49-6742-01A-11R-1858-07	Tumor	4.76751
TCGA-49-6742-11A-01R-1858-07	Normal	1.57221
TCGA-49-6743-01A-11R-1858-07	Tumor	5.13553
TCGA-49-6743-11A-01R-1858-07	Normal	1.01842
TCGA-49-6744-01A-11R-1858-07	Tumor	3.00214
TCGA-49-6744-11A-01R-1858-07	Normal	1.21431
TCGA-49-6745-01A-11R-1858-07	Tumor	4.40722
TCGA-49-6745-11A-01R-1858-07	Normal	1.17114
TCGA-49-6761-01A-31R-1949-07	Tumor	4.1398
TCGA-49-6761-11A-01R-1949-07	Normal	1.06067
TCGA-49-6767-01A-11R-1858-07	Tumor	4.56335
TCGA-49-AAQV-01A-11R-A39D-07	Tumor	3.54418
TCGA-49-AAR0-01A-21R-A39D-07	Tumor	4.35292
TCGA-49-AAR2-01A-11R-A39D-07	Tumor	3.27462
TCGA-49-AAR3-01A-11R-A41B-07	Tumor	4.51583
TCGA-49-AAR4-01A-12R-A41B-07	Tumor	3.25072
TCGA-49-AAR9-01A-21R-A41B-07	Tumor	5.34229
TCGA-49-AARE-01A-11R-A41B-07	Tumor	4.91272
TCGA-49-AARN-01A-21R-A41B-07	Tumor	3.07574
TCGA-49-AARO-01A-12R-A41B-07	Tumor	3.92118
TCGA-49-AARQ-01A-11R-A41B-07	Tumor	2.68421
TCGA-49-AARR-01A-11R-A41B-07	Tumor	2.12181
TCGA-4B-A93V-01A-11R-A39D-07	Tumor	4.26635
TCGA-50-5044-01A-21R-1858-07	Tumor	4.36937
TCGA-50-5045-01A-01R-1628-07	Tumor	3.16538
TCGA-50-5049-01A-01R-1628-07	Tumor	3.29038
TCGA-50-5051-01A-21R-1858-07	Tumor	4.05662
TCGA-50-5055-01A-01R-1628-07	Tumor	2.92488
TCGA-50-5066-01A-01R-1628-07	Tumor	3.64356
TCGA-50-5066-02A-11R-2090-07	Tumor	4.70869
TCGA-50-5068-01A-01R-1628-07	Tumor	2.20664
TCGA-50-5072-01A-21R-1858-07	Tumor	5.81689
TCGA-50-5930-01A-11R-1755-07	Tumor	2.86221
TCGA-50-5930-11A-01R-1755-07	Normal	0.945982
TCGA-50-5931-01A-11R-1755-07	Tumor	4.99141
TCGA-50-5931-11A-01R-1858-07	Normal	0.735522
TCGA-50-5932-01A-11R-1755-07	Tumor	3.55724
TCGA-50-5932-11A-01R-1755-07	Normal	1.09714
TCGA-50-5933-01A-11R-1755-07	Tumor	4.84962
TCGA-50-5933-11A-01R-1755-07	Normal	0.803227
TCGA-50-5935-01A-11R-1755-07	Tumor	2.76477
TCGA-50-5935-11A-01R-1858-07	Normal	1.49549
TCGA-50-5936-01A-11R-1628-07	Tumor	4.60112
TCGA-50-5936-11A-01R-1628-07	Normal	0.868687
TCGA-50-5939-01A-11R-1628-07	Tumor	4.16029
TCGA-50-5939-11A-01R-1628-07	Normal	0.989575
TCGA-50-5941-01A-11R-1755-07	Tumor	4.15381
TCGA-50-5942-01A-21R-1755-07	Tumor	1.94295
TCGA-50-5944-01A-11R-1755-07	Tumor	2.44353
TCGA-50-5946-01A-11R-1755-07	Tumor	5.4736
TCGA-50-5946-02A-11R-2090-07	Tumor	4.81123
TCGA-50-6590-01A-12R-1858-07	Tumor	4.78676
TCGA-50-6591-01A-11R-1755-07	Tumor	5.69304
TCGA-50-6592-01A-11R-1755-07	Tumor	4.89102
TCGA-50-6593-01A-11R-1755-07	Tumor	4.9723
TCGA-50-6594-01A-11R-1755-07	Tumor	4.96066
TCGA-50-6595-01A-12R-1858-07	Tumor	5.49299
TCGA-50-6595-11A-01R-1858-07	Normal	0.86259
TCGA-50-6597-01A-11R-1858-07	Tumor	1.38962
TCGA-50-6673-01A-11R-1949-07	Tumor	3.90446
TCGA-50-7109-01A-11R-2039-07	Tumor	3.51128
TCGA-50-8457-01A-11R-2326-07	Tumor	1.53107
TCGA-50-8459-01A-11R-2326-07	Tumor	2.68921
TCGA-50-8460-01A-11R-2326-07	Tumor	2.65109
TCGA-53-7624-01A-11R-2066-07	Tumor	5.64165
TCGA-53-7626-01A-12R-2066-07	Tumor	3.11288
TCGA-53-7813-01A-11R-2170-07	Tumor	2.46019
TCGA-53-A4EZ-01A-12R-A24X-07	Tumor	4.24717
TCGA-55-1592-01A-01R-0946-07	Tumor	3.93336
TCGA-55-1594-01A-01R-0946-07	Tumor	4.53457
TCGA-55-1595-01A-01R-0946-07	Tumor	3.4486
TCGA-55-1596-01A-01R-0946-07	Tumor	5.08828
TCGA-55-5899-01A-11R-1628-07	Tumor	4.94497
TCGA-55-6543-01A-11R-1755-07	Tumor	1.97849
TCGA-55-6642-01A-11R-1858-07	Tumor	2.51758
TCGA-55-6712-01A-11R-1858-07	Tumor	3.73773
TCGA-55-6968-01A-11R-1949-07	Tumor	5.4116
TCGA-55-6968-11A-01R-1949-07	Normal	1.49042
TCGA-55-6969-01A-11R-1949-07	Tumor	3.84095
TCGA-55-6969-11A-01R-1949-07	Normal	1.68657
TCGA-55-6970-01A-11R-1949-07	Tumor	3.63972
TCGA-55-6970-11A-01R-1949-07	Normal	1.28724
TCGA-55-6971-01A-11R-1949-07	Tumor	3.18307
TCGA-55-6971-11A-01R-1949-07	Normal	1.11776
TCGA-55-6972-01A-11R-1949-07	Tumor	2.14545
TCGA-55-6972-11A-01R-1949-07	Normal	1.54547
TCGA-55-6975-01A-11R-1949-07	Tumor	5.24396
TCGA-55-6975-11A-01R-1949-07	Normal	1.50752
TCGA-55-6978-01A-11R-1949-07	Tumor	4.84643
TCGA-55-6978-11A-01R-1949-07	Normal	1.17639
TCGA-55-6979-01A-11R-1949-07	Tumor	3.80179
TCGA-55-6979-11A-01R-1949-07	Normal	1.16941
TCGA-55-6980-01A-11R-1949-07	Tumor	1.93493
TCGA-55-6980-11A-01R-1949-07	Normal	1.2916
TCGA-55-6981-01A-11R-1949-07	Tumor	3.68558
TCGA-55-6981-11A-01R-1949-07	Normal	1.89743
TCGA-55-6982-01A-11R-1949-07	Tumor	4.01518
TCGA-55-6982-11A-01R-1949-07	Normal	1.49293
TCGA-55-6983-01A-11R-1949-07	Tumor	2.623
TCGA-55-6983-11A-01R-1949-07	Normal	1.62933
TCGA-55-6984-01A-11R-1949-07	Tumor	3.79419
TCGA-55-6984-11A-01R-1949-07	Normal	1.081
TCGA-55-6985-01A-11R-1949-07	Tumor	3.86131
TCGA-55-6985-11A-01R-1949-07	Normal	1.18384
TCGA-55-6986-01A-11R-1949-07	Tumor	3.05198
TCGA-55-6986-11A-01R-1949-07	Normal	1.28024
TCGA-55-6987-01A-11R-1949-07	Tumor	3.21557
TCGA-55-7227-01A-11R-2039-07	Tumor	3.13305
TCGA-55-7281-01A-11R-2039-07	Tumor	2.8928
TCGA-55-7283-01A-11R-2039-07	Tumor	3.73391
TCGA-55-7284-01B-11R-2241-07	Tumor	3.11121
TCGA-55-7570-01A-11R-2039-07	Tumor	5.75534
TCGA-55-7573-01A-11R-2039-07	Tumor	2.39613
TCGA-55-7574-01A-11R-2039-07	Tumor	3.09677
TCGA-55-7576-01A-11R-2066-07	Tumor	3.68197
TCGA-55-7724-01A-11R-2170-07	Tumor	3.3412
TCGA-55-7725-01A-11R-2170-07	Tumor	1.93365
TCGA-55-7726-01A-11R-2170-07	Tumor	4.77185
TCGA-55-7727-01A-11R-2170-07	Tumor	3.48872
TCGA-55-7728-01A-11R-2187-07	Tumor	3.01037
TCGA-55-7815-01A-11R-2170-07	Tumor	2.9602
TCGA-55-7816-01A-11R-2170-07	Tumor	2.58782
TCGA-55-7903-01A-11R-2170-07	Tumor	4.23058
TCGA-55-7907-01A-11R-2170-07	Tumor	3.60103
TCGA-55-7910-01A-11R-2170-07	Tumor	3.80556
TCGA-55-7911-01A-11R-2170-07	Tumor	4.17761
TCGA-55-7913-01B-11R-2241-07	Tumor	4.54781
TCGA-55-7914-01A-11R-2170-07	Tumor	2.26129
TCGA-55-7994-01A-11R-2187-07	Tumor	4.88378
TCGA-55-7995-01A-11R-2187-07	Tumor	5.28007
TCGA-55-8085-01A-11R-2241-07	Tumor	4.48679
TCGA-55-8087-01A-11R-2241-07	Tumor	1.98736
TCGA-55-8089-01A-11R-2241-07	Tumor	4.48567
TCGA-55-8090-01A-11R-2241-07	Tumor	3.39259
TCGA-55-8091-01A-11R-2241-07	Tumor	2.46506
TCGA-55-8092-01A-11R-2241-07	Tumor	3.5623
TCGA-55-8094-01A-11R-2241-07	Tumor	3.71789
TCGA-55-8096-01A-11R-2241-07	Tumor	3.45298
TCGA-55-8097-01A-11R-2241-07	Tumor	2.27259
TCGA-55-8203-01A-11R-2241-07	Tumor	3.75102
TCGA-55-8204-01A-11R-2241-07	Tumor	3.55129
TCGA-55-8205-01A-11R-2241-07	Tumor	5.3222
TCGA-55-8206-01A-11R-2241-07	Tumor	2.15843
TCGA-55-8207-01A-11R-2241-07	Tumor	1.42562
TCGA-55-8208-01A-11R-2241-07	Tumor	3.33444
TCGA-55-8299-01A-11R-2287-07	Tumor	3.9706
TCGA-55-8301-01A-11R-2287-07	Tumor	3.82142
TCGA-55-8302-01A-11R-2326-07	Tumor	4.35269
TCGA-55-8505-01A-11R-2403-07	Tumor	4.08716
TCGA-55-8506-01A-11R-2403-07	Tumor	4.7699
TCGA-55-8507-01A-11R-2403-07	Tumor	4.29154
TCGA-55-8508-01A-11R-2403-07	Tumor	3.39825
TCGA-55-8510-01A-11R-2403-07	Tumor	3.68997
TCGA-55-8511-01A-11R-2403-07	Tumor	4.57757
TCGA-55-8512-01A-11R-2403-07	Tumor	2.22774
TCGA-55-8513-01A-11R-2403-07	Tumor	2.49075
TCGA-55-8514-01A-11R-2403-07	Tumor	2.42086
TCGA-55-8614-01A-11R-2403-07	Tumor	3.90565
TCGA-55-8615-01A-11R-2403-07	Tumor	3.35455
TCGA-55-8616-01A-11R-2403-07	Tumor	3.00556
TCGA-55-8619-01A-11R-2403-07	Tumor	2.73147
TCGA-55-8620-01A-11R-2403-07	Tumor	5.55711
TCGA-55-8621-01A-11R-2403-07	Tumor	2.89769
TCGA-55-A48X-01A-11R-A24H-07	Tumor	3.23645
TCGA-55-A48Y-01A-11R-A24H-07	Tumor	3.50848
TCGA-55-A48Z-01A-12R-A24X-07	Tumor	3.61517
TCGA-55-A490-01A-11R-A466-07	Tumor	5.01538
TCGA-55-A491-01A-11R-A24H-07	Tumor	1.97735
TCGA-55-A492-01A-11R-A24H-07	Tumor	1.67157
TCGA-55-A493-01A-11R-A24H-07	Tumor	6.09828
TCGA-55-A494-01A-11R-A24X-07	Tumor	4.31822
TCGA-55-A4DF-01A-11R-A24H-07	Tumor	4.92081
TCGA-55-A4DG-01A-11R-A24H-07	Tumor	2.3197
TCGA-55-A57B-01A-12R-A39D-07	Tumor	3.03865
TCGA-62-8394-01A-11R-2326-07	Tumor	4.55513
TCGA-62-8395-01A-11R-2326-07	Tumor	2.26571
TCGA-62-8397-01A-11R-2326-07	Tumor	1.32008
TCGA-62-8398-01A-11R-2326-07	Tumor	5.40197
TCGA-62-8399-01A-21R-2326-07	Tumor	3.70837
TCGA-62-8402-01A-11R-2326-07	Tumor	4.25966
TCGA-62-A46O-01A-11R-A24H-07	Tumor	4.67263
TCGA-62-A46P-01A-11R-A24H-07	Tumor	2.18865
TCGA-62-A46R-01A-11R-A24H-07	Tumor	3.24275
TCGA-62-A46S-01A-11R-A24H-07	Tumor	2.1173
TCGA-62-A46U-01A-11R-A24H-07	Tumor	3.61893
TCGA-62-A46V-01A-11R-A24H-07	Tumor	2.56203
TCGA-62-A46Y-01A-11R-A24H-07	Tumor	3.19683
TCGA-62-A470-01A-11R-A24H-07	Tumor	3.44582
TCGA-62-A471-01A-12R-A24H-07	Tumor	4.60198
TCGA-62-A472-01A-11R-A24H-07	Tumor	3.82177
TCGA-64-1676-01A-01R-0946-07	Tumor	2.98896
TCGA-64-1677-01A-01R-0946-07	Tumor	3.16216
TCGA-64-1678-01A-01R-0946-07	Tumor	4.03872
TCGA-64-1679-01A-21R-2066-07	Tumor	4.53635
TCGA-64-1680-01A-02R-0946-07	Tumor	2.40081
TCGA-64-1681-01A-11R-2066-07	Tumor	2.90626
TCGA-64-5774-01A-01R-1628-07	Tumor	5.27375
TCGA-64-5775-01A-01R-1628-07	Tumor	5.08264
TCGA-64-5778-01A-01R-1628-07	Tumor	2.85748
TCGA-64-5779-01A-01R-1628-07	Tumor	3.18303
TCGA-64-5781-01A-01R-1628-07	Tumor	3.52247
TCGA-64-5815-01A-01R-1628-07	Tumor	3.65628
TCGA-67-3770-01A-01R-0946-07	Tumor	1.70097
TCGA-67-3771-01A-01R-0946-07	Tumor	3.51276
TCGA-67-3772-01A-01R-0946-07	Tumor	2.37835
TCGA-67-3773-01A-01R-0946-07	Tumor	1.62377
TCGA-67-3774-01A-01R-0946-07	Tumor	2.37387
TCGA-67-4679-01B-01R-1755-07	Tumor	2.13169
TCGA-67-6215-01A-11R-1755-07	Tumor	3.75481
TCGA-67-6216-01A-11R-1755-07	Tumor	2.76613
TCGA-67-6217-01A-11R-1755-07	Tumor	1.87015
TCGA-69-7760-01A-11R-2170-07	Tumor	3.79144
TCGA-69-7761-01A-11R-2170-07	Tumor	3.97849
TCGA-69-7763-01A-11R-2170-07	Tumor	2.25776
TCGA-69-7764-01A-11R-2170-07	Tumor	2.47516
TCGA-69-7765-01A-11R-2170-07	Tumor	3.16551
TCGA-69-7973-01A-11R-2187-07	Tumor	5.30609
TCGA-69-7974-01A-11R-2187-07	Tumor	4.31623
TCGA-69-7978-01A-11R-2187-07	Tumor	3.85293
TCGA-69-7979-01A-11R-2187-07	Tumor	3.82323
TCGA-69-7980-01A-11R-2187-07	Tumor	3.24565
TCGA-69-8253-01A-11R-2287-07	Tumor	2.57126
TCGA-69-8254-01A-11R-2287-07	Tumor	4.13012
TCGA-69-8255-01A-11R-2287-07	Tumor	5.04637
TCGA-69-8453-01A-12R-2326-07	Tumor	3.86133
TCGA-69-A59K-01A-11R-A262-07	Tumor	3.93657
TCGA-71-6725-01A-11R-1858-07	Tumor	3.15249
TCGA-71-8520-01A-11R-2403-07	Tumor	4.45045
TCGA-73-4658-01A-01R-1755-07	Tumor	3.44887
TCGA-73-4659-01A-01R-1206-07	Tumor	4.50181
TCGA-73-4662-01A-01R-1206-07	Tumor	2.81332
TCGA-73-4666-01A-01R-1206-07	Tumor	5.85791
TCGA-73-4668-01A-01R-1206-07	Tumor	4.21773
TCGA-73-4670-01A-01R-1206-07	Tumor	5.232
TCGA-73-4675-01A-01R-1206-07	Tumor	3.27657
TCGA-73-4676-01A-01R-1755-07	Tumor	4.57379
TCGA-73-4676-11A-01R-1755-07	Normal	1.3888
TCGA-73-4677-01A-01R-1206-07	Tumor	1.81073
TCGA-73-7498-01A-12R-2187-07	Tumor	1.93716
TCGA-73-7499-01A-11R-2187-07	Tumor	4.12026
TCGA-73-A9RS-01A-11R-A41B-07	Tumor	4.59978
TCGA-75-5122-01A-01R-1755-07	Tumor	4.33299
TCGA-75-5125-01A-01R-1755-07	Tumor	5.23091
TCGA-75-5126-01A-01R-1755-07	Tumor	5.26842
TCGA-75-5146-01A-01R-1628-07	Tumor	1.82847
TCGA-75-5147-01A-01R-1628-07	Tumor	4.27456
TCGA-75-6203-01A-11R-1755-07	Tumor	1.83552
TCGA-75-6205-01A-11R-1755-07	Tumor	4.19166
TCGA-75-6206-01A-11R-1755-07	Tumor	1.17989
TCGA-75-6207-01A-11R-1755-07	Tumor	4.29006
TCGA-75-6211-01A-11R-1755-07	Tumor	3.95583
TCGA-75-6212-01A-11R-1755-07	Tumor	2.39199
TCGA-75-6214-01A-41R-1949-07	Tumor	4.99011
TCGA-75-7025-01A-12R-1949-07	Tumor	2.25281
TCGA-75-7027-01A-11R-1949-07	Tumor	5.19682
TCGA-75-7030-01A-11R-1949-07	Tumor	2.02591
TCGA-75-7031-01A-11R-1949-07	Tumor	3.74291
TCGA-78-7143-01A-11R-2039-07	Tumor	4.39793
TCGA-78-7145-01A-11R-2039-07	Tumor	4.0678
TCGA-78-7146-01A-11R-2039-07	Tumor	5.88528
TCGA-78-7147-01A-11R-2039-07	Tumor	3.68151
TCGA-78-7148-01A-11R-2039-07	Tumor	4.07059
TCGA-78-7149-01A-11R-2039-07	Tumor	2.20433
TCGA-78-7150-01A-21R-2039-07	Tumor	5.07307
TCGA-78-7152-01A-11R-2039-07	Tumor	3.43389
TCGA-78-7153-01A-11R-2039-07	Tumor	2.58138
TCGA-78-7154-01A-11R-2039-07	Tumor	5.02068
TCGA-78-7155-01A-11R-2039-07	Tumor	6.21372
TCGA-78-7156-01A-11R-2039-07	Tumor	1.86845
TCGA-78-7158-01A-11R-2039-07	Tumor	3.07365
TCGA-78-7159-01A-11R-2039-07	Tumor	4.25688
TCGA-78-7160-01A-11R-2039-07	Tumor	4.24976
TCGA-78-7161-01A-11R-2039-07	Tumor	2.2122
TCGA-78-7162-01A-21R-2066-07	Tumor	1.90254
TCGA-78-7163-01A-12R-2066-07	Tumor	1.81262
TCGA-78-7166-01A-12R-2066-07	Tumor	3.05048
TCGA-78-7167-01A-11R-2066-07	Tumor	1.31956
TCGA-78-7220-01A-11R-2039-07	Tumor	4.98324
TCGA-78-7535-01A-11R-2066-07	Tumor	3.68732
TCGA-78-7536-01A-11R-2066-07	Tumor	4.95541
TCGA-78-7537-01A-11R-2066-07	Tumor	1.74106
TCGA-78-7539-01A-11R-2066-07	Tumor	2.05731
TCGA-78-7540-01A-11R-2066-07	Tumor	2.88098
TCGA-78-7542-01A-21R-2066-07	Tumor	5.97037
TCGA-78-7633-01A-11R-2066-07	Tumor	2.18177
TCGA-78-8640-01A-11R-2403-07	Tumor	4.74482
TCGA-78-8648-01A-11R-2403-07	Tumor	2.98202
TCGA-78-8655-01A-11R-2403-07	Tumor	3.27005
TCGA-78-8660-01A-11R-2403-07	Tumor	5.39997
TCGA-78-8662-01A-11R-2403-07	Tumor	4.6668
TCGA-80-5607-01A-31R-1949-07	Tumor	4.16701
TCGA-80-5608-01A-31R-1949-07	Tumor	4.06302
TCGA-80-5611-01A-01R-1628-07	Tumor	5.05351
TCGA-83-5908-01A-21R-2287-07	Tumor	5.48003
TCGA-86-6562-01A-11R-1755-07	Tumor	3.68388
TCGA-86-6851-01A-11R-1949-07	Tumor	3.22268
TCGA-86-7701-01A-11R-2170-07	Tumor	4.48054
TCGA-86-7711-01A-11R-2066-07	Tumor	4.52966
TCGA-86-7713-01A-11R-2066-07	Tumor	4.62215
TCGA-86-7714-01A-12R-2170-07	Tumor	2.67593
TCGA-86-7953-01A-11R-2187-07	Tumor	5.59476
TCGA-86-7954-01A-11R-2187-07	Tumor	4.4323
TCGA-86-7955-01A-11R-2187-07	Tumor	5.23756
TCGA-86-8054-01A-11R-2241-07	Tumor	5.07705
TCGA-86-8055-01A-11R-2241-07	Tumor	3.95934
TCGA-86-8056-01A-11R-2241-07	Tumor	1.96938
TCGA-86-8073-01A-11R-2241-07	Tumor	3.05235
TCGA-86-8074-01A-11R-2241-07	Tumor	4.5736
TCGA-86-8075-01A-11R-2241-07	Tumor	4.04398
TCGA-86-8076-01A-31R-2241-07	Tumor	2.05807
TCGA-86-8278-01A-11R-2287-07	Tumor	3.53284
TCGA-86-8279-01A-11R-2287-07	Tumor	3.87315
TCGA-86-8280-01A-11R-2287-07	Tumor	2.97308
TCGA-86-8281-01A-11R-2287-07	Tumor	2.14303
TCGA-86-8358-01A-11R-2326-07	Tumor	6.53732
TCGA-86-8359-01A-11R-2326-07	Tumor	3.33982
TCGA-86-8585-01A-11R-2403-07	Tumor	4.33121
TCGA-86-8668-01A-11R-2403-07	Tumor	3.07733
TCGA-86-8669-01A-11R-2403-07	Tumor	2.89616
TCGA-86-8671-01A-11R-2403-07	Tumor	3.18653
TCGA-86-8672-01A-21R-2403-07	Tumor	4.58813
TCGA-86-8673-01A-11R-2403-07	Tumor	3.77454
TCGA-86-8674-01A-21R-2403-07	Tumor	3.24025
TCGA-86-A456-01A-11R-A24H-07	Tumor	2.64141
TCGA-86-A4D0-01A-11R-A24H-07	Tumor	5.46879
TCGA-86-A4JF-01A-11R-A24X-07	Tumor	4.40102
TCGA-86-A4P7-01A-11R-A24X-07	Tumor	3.2719
TCGA-86-A4P8-01A-11R-A24X-07	Tumor	1.87129
TCGA-91-6828-01A-11R-1858-07	Tumor	3.60722
TCGA-91-6828-11A-01R-1858-07	Normal	0.756511
TCGA-91-6829-01A-21R-1858-07	Tumor	4.11383
TCGA-91-6829-11A-01R-1858-07	Normal	1.87668
TCGA-91-6830-01A-11R-1949-07	Tumor	3.42112
TCGA-91-6831-01A-11R-1858-07	Tumor	4.87624
TCGA-91-6831-11A-02R-1858-07	Normal	0.966726
TCGA-91-6835-01A-11R-1858-07	Tumor	3.86731
TCGA-91-6835-11A-01R-1858-07	Normal	1.43653
TCGA-91-6836-01A-21R-1858-07	Tumor	5.80917
TCGA-91-6836-11A-01R-1858-07	Normal	0.936968
TCGA-91-6840-01A-11R-1949-07	Tumor	4.50197
TCGA-91-6847-01A-11R-1949-07	Tumor	4.3422
TCGA-91-6847-11A-01R-1949-07	Normal	1.17133
TCGA-91-6848-01A-11R-1949-07	Tumor	5.6714
TCGA-91-6849-01A-11R-1949-07	Tumor	1.18789
TCGA-91-6849-11A-01R-1949-07	Normal	1.24489
TCGA-91-7771-01A-11R-2170-07	Tumor	2.44522
TCGA-91-8496-01A-11R-2403-07	Tumor	1.81721
TCGA-91-8497-01A-11R-2403-07	Tumor	1.95453
TCGA-91-8499-01A-11R-2403-07	Tumor	5.24004
TCGA-91-A4BC-01A-11R-A24H-07	Tumor	3.89626
TCGA-91-A4BD-01A-11R-A24H-07	Tumor	1.61636
TCGA-93-7347-01A-11R-2187-07	Tumor	3.00317
TCGA-93-7348-01A-21R-2039-07	Tumor	2.5634
TCGA-93-8067-01A-11R-2287-07	Tumor	5.06827
TCGA-93-A4JN-01A-11R-A24X-07	Tumor	4.37739
TCGA-93-A4JO-01A-21R-A24X-07	Tumor	3.09229
TCGA-93-A4JP-01A-11R-A24X-07	Tumor	3.86599
TCGA-93-A4JQ-01A-11R-A24X-07	Tumor	4.02318
TCGA-95-7039-01A-11R-1949-07	Tumor	4.51361
TCGA-95-7043-01A-11R-1949-07	Tumor	4.19885
TCGA-95-7562-01A-11R-2241-07	Tumor	4.44655
TCGA-95-7567-01A-11R-2066-07	Tumor	3.54504
TCGA-95-7944-01A-11R-2187-07	Tumor	4.53659
TCGA-95-7947-01A-11R-2187-07	Tumor	5.24941
TCGA-95-7948-01A-11R-2187-07	Tumor	2.98381
TCGA-95-8039-01A-11R-2241-07	Tumor	3.29182
TCGA-95-8494-01A-11R-2326-07	Tumor	5.09665
TCGA-95-A4VK-01A-11R-A262-07	Tumor	3.72612
TCGA-95-A4VN-01A-11R-A262-07	Tumor	5.02858
TCGA-95-A4VP-01A-21R-A262-07	Tumor	3.84731
TCGA-97-7546-01A-11R-2039-07	Tumor	2.78494
TCGA-97-7547-01A-11R-2039-07	Tumor	1.93667
TCGA-97-7552-01A-11R-2039-07	Tumor	2.58017
TCGA-97-7553-01A-21R-2039-07	Tumor	3.31129
TCGA-97-7554-01A-11R-2039-07	Tumor	2.91244
TCGA-97-7937-01A-11R-2170-07	Tumor	3.42485
TCGA-97-7938-01A-11R-2170-07	Tumor	1.78906
TCGA-97-7941-01A-11R-2187-07	Tumor	2.76269
TCGA-97-8171-01A-11R-2287-07	Tumor	2.47576
TCGA-97-8172-01A-11R-2287-07	Tumor	2.21757
TCGA-97-8174-01A-11R-2287-07	Tumor	2.07015
TCGA-97-8175-01A-11R-2287-07	Tumor	3.21014
TCGA-97-8176-01A-11R-2403-07	Tumor	5.47895
TCGA-97-8177-01A-11R-2287-07	Tumor	2.90658
TCGA-97-8179-01A-11R-2287-07	Tumor	4.18764
TCGA-97-8547-01A-11R-2403-07	Tumor	3.27371
TCGA-97-8552-01A-11R-2403-07	Tumor	1.68912
TCGA-97-A4LX-01A-11R-A24X-07	Tumor	3.81808
TCGA-97-A4M0-01A-11R-A24X-07	Tumor	2.85192
TCGA-97-A4M1-01A-11R-A24X-07	Tumor	2.49797
TCGA-97-A4M2-01A-12R-A24X-07	Tumor	2.40893
TCGA-97-A4M3-01A-11R-A24X-07	Tumor	2.21282
TCGA-97-A4M5-01A-11R-A24X-07	Tumor	3.7377
TCGA-97-A4M6-01A-11R-A24X-07	Tumor	3.05169
TCGA-97-A4M7-01A-11R-A24X-07	Tumor	3.30864
TCGA-99-7458-01A-11R-2039-07	Tumor	2.849
TCGA-99-8025-01A-11R-2241-07	Tumor	3.93631
TCGA-99-8028-01A-11R-2241-07	Tumor	2.15416
TCGA-99-8032-01A-11R-2241-07	Tumor	3.20474
TCGA-99-8033-01A-11R-2241-07	Tumor	5.36932
TCGA-99-AA5R-01A-11R-A39D-07	Tumor	2.00838
TCGA-J2-8192-01A-11R-2241-07	Tumor	2.39898
TCGA-J2-8194-01A-11R-2241-07	Tumor	1.79123
TCGA-J2-A4AD-01A-11R-A24H-07	Tumor	4.27462
TCGA-J2-A4AE-01A-21R-A24H-07	Tumor	2.23958
TCGA-J2-A4AG-01A-11R-A24H-07	Tumor	2.32392
TCGA-L4-A4E5-01A-11R-A24X-07	Tumor	3.99646
TCGA-L4-A4E6-01A-11R-A24H-07	Tumor	1.99114
TCGA-L9-A443-01A-12R-A24H-07	Tumor	2.2306
TCGA-L9-A444-01A-21R-A24H-07	Tumor	2.86152
TCGA-L9-A50W-01A-12R-A39D-07	Tumor	2.5581
TCGA-L9-A5IP-01A-21R-A39D-07	Tumor	4.68778
TCGA-L9-A743-01A-43R-A39D-07	Tumor	3.69286
TCGA-L9-A7SV-01A-11R-A39D-07	Tumor	4.13316
TCGA-L9-A8F4-01A-11R-A39D-07	Tumor	4.38742
TCGA-MN-A4N1-01A-11R-A24X-07	Tumor	4.70767
TCGA-MN-A4N4-01A-12R-A24X-07	Tumor	3.34092
TCGA-MN-A4N5-01A-11R-A24X-07	Tumor	3.804
TCGA-MP-A4SV-01A-11R-A24X-07	Tumor	4.81046
TCGA-MP-A4SW-01A-21R-A24X-07	Tumor	4.4895
TCGA-MP-A4SY-01A-21R-A24X-07	Tumor	3.71532
TCGA-MP-A4T4-01A-11R-A262-07	Tumor	3.85322
TCGA-MP-A4T6-01A-32R-A262-07	Tumor	2.97449
TCGA-MP-A4T7-01A-11R-A24X-07	Tumor	4.15643
TCGA-MP-A4T8-01A-11R-A24X-07	Tumor	4.24806
TCGA-MP-A4T9-01A-11R-A24X-07	Tumor	3.59827
TCGA-MP-A4TA-01A-21R-A24X-07	Tumor	6.28765
TCGA-MP-A4TC-01A-11R-A24X-07	Tumor	4.79267
TCGA-MP-A4TD-01A-32R-A262-07	Tumor	3.54483
TCGA-MP-A4TE-01A-22R-A466-07	Tumor	3.95971
TCGA-MP-A4TF-01A-11R-A262-07	Tumor	3.73827
TCGA-MP-A4TH-01A-31R-A262-07	Tumor	2.03154
TCGA-MP-A4TI-01A-21R-A24X-07	Tumor	4.94202
TCGA-MP-A4TJ-01A-51R-A262-07	Tumor	3.199
TCGA-MP-A4TK-01A-11R-A24X-07	Tumor	4.20486
TCGA-MP-A5C7-01A-11R-A262-07	Tumor	2.73485
TCGA-NJ-A4YF-01A-12R-A262-07	Tumor	3.0339
TCGA-NJ-A4YG-01A-22R-A262-07	Tumor	2.9348
TCGA-NJ-A4YI-01A-11R-A262-07	Tumor	3.48063
TCGA-NJ-A4YP-01A-11R-A262-07	Tumor	4.63008
TCGA-NJ-A4YQ-01A-11R-A262-07	Tumor	3.82265
TCGA-NJ-A55A-01A-11R-A262-07	Tumor	2.54735
TCGA-NJ-A55O-01A-11R-A262-07	Tumor	3.37167
TCGA-NJ-A55R-01A-11R-A262-07	Tumor	3.34026
TCGA-NJ-A7XG-01A-12R-A39D-07	Tumor	2.61843
TCGA-O1-A52J-01A-11R-A262-07	Tumor	3.10262
TCGA-S2-AA1A-01A-12R-A39D-07	Tumor	2.1903
