# Supplementary material for: PLK1 overexpression as a dual-role biomarker and therapeutic vulnerability in pulmonary adenocarcinoma
Source: PeerJ journal article supplement (doi:10.7717/peerj.20618), 2026-01-15
Supplement: additional_files.tar [file Figure 1C related data.xlsx]

## Sheet: Sheet 1
pair_info
