# Supplementary material for: PLK1 overexpression as a dual-role biomarker and therapeutic vulnerability in pulmonary adenocarcinoma
Source: PeerJ journal article supplement (doi:10.7717/peerj.20618), 2026-01-15

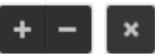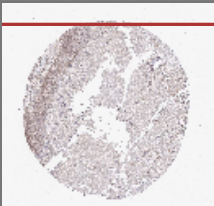

**Lung cancer**  
**HPA053229**  
Male, age 66  
Lung (T-28000)  
Lymph node (T-08000)  
Squamous cell carcinoma,  
NOS (M-80703)  
Normal tissue, NOS (M-00100)  
Patient id: 3185

**Tumor cells**  
Staining: **Medium**  
Intensity: **Moderate**  
Quantity: **75%-25%**  
Location: **Nuclear**

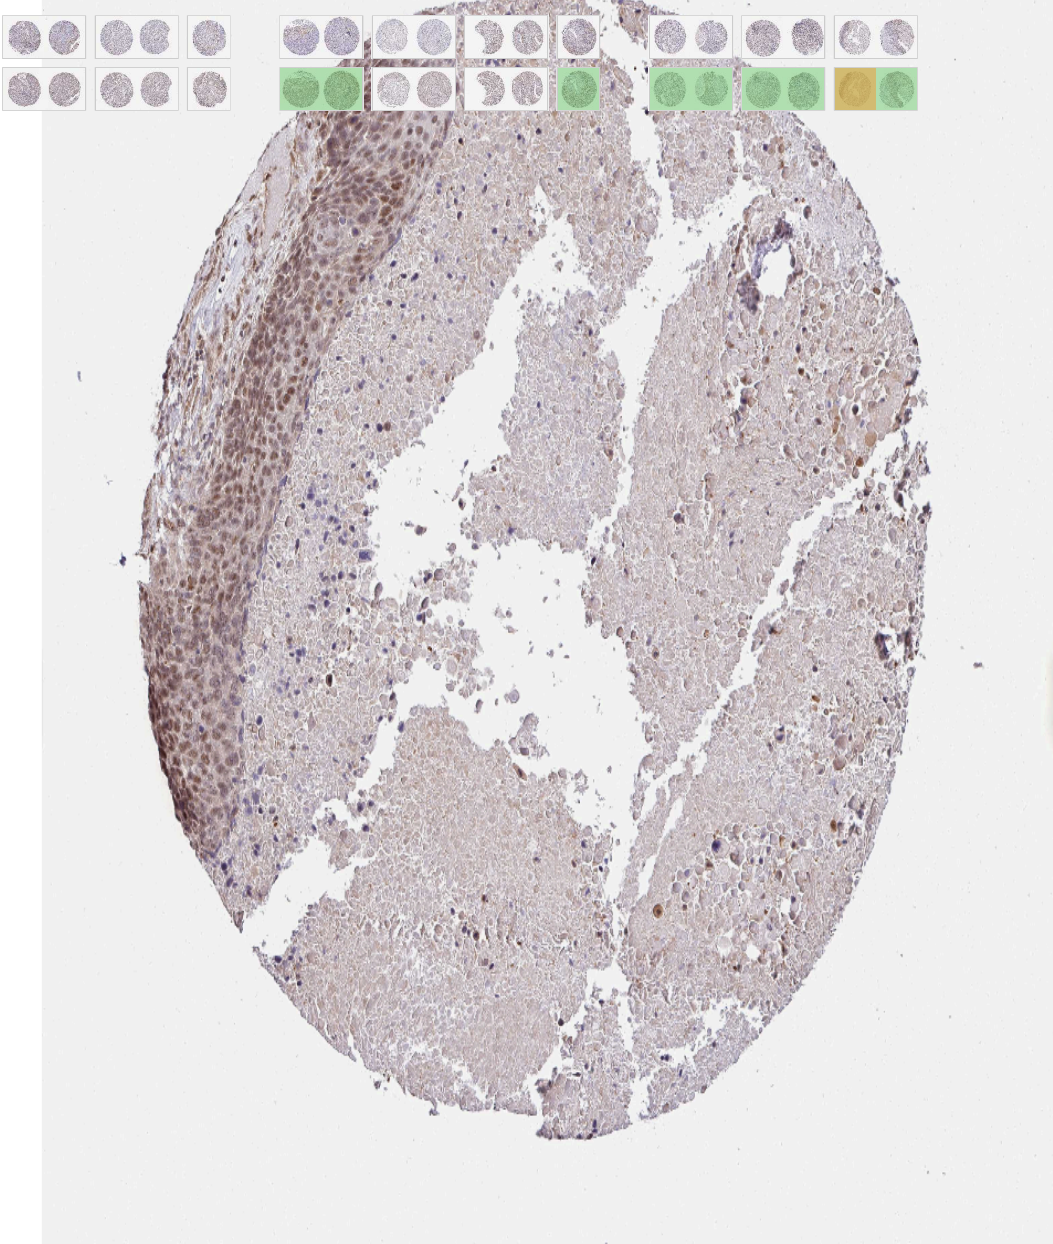

Supplement: additional_files.tar [file Figure 1F Expression of PLK1 in lung cancer - The Human Protein Atlas.pdf › additional files/Figure 1F Expression of PLK1 in lung cancer - The Human Protein Atlas.pdf]
