# Supplementary material for: PLK1 overexpression as a dual-role biomarker and therapeutic vulnerability in pulmonary adenocarcinoma
Source: PeerJ journal article supplement (doi:10.7717/peerj.20618), 2026-01-15
Supplement: additional_files.tar [file Figure 3 related data1.xlsx]

## Sheet: Sheet 1
event	time	value	group
live	0	4.26745	High
live	1523	2.80387	Low
dead	121	5.42726	High
live	607	3.70512	High
live	426	2.09484	Low
live	1369	3.94462	High
live	1126	5.25834	High
dead	0	4.75397	High
dead	303	2.98163	Low
dead	731	6.32535	High
live	1431	5.05154	High
dead	244	3.74069	High
live	578	2.83368	Low
live	610	2.5901	Low
live	0	3.55481	Low
dead	91	5.56587	High
live	455	3.43796	Low
dead	274	3.48486	Low
live	912	4.12326	High
live	365	3.58499	Low
live	913	4.35165	High
live	669	3.67831	High
live	791	2.8405	Low
live	791	4.11812	High
live	761	3.76931	High
live	761	4.19152	High
live	730	4.3961	High
dead	457	4.73565	High
live	457	2.93009	Low
live	151	2.99166	Low
live	882	4.19548	High
live	670	3.95424	High
dead	275	4.02672	High
live	62	3.62821	High
live	14	1.90524	Low
live	225	3.68585	High
live	182	3.53495	Low
live	264	3.4223	Low
live	2973	6.21454	High
live	3674	2.52857	Low
dead	1147	2.87869	Low
dead	1492	3.62018	High
dead	864	4.98727	High
dead	1073	6.06927	High
dead	354	5.10045	High
dead	1357	4.49228	High
live	448	3.59297	High
dead	800	2.44424	Low
live	133	2.3838	Low
live	1324	2.19257	Low
live	1429	3.46905	Low
live	1429	2.11876	Low
live	1429	2.02811	Low
live	1351	3.12073	Low
live	1367	2.57388	Low
live	1159	2.08165	Low
live	1280	5.56017	High
live	1280	4.09362	High
live	1280	3.1992	Low
live	1301	3.50833	Low
live	1301	2.22571	Low
dead	97	4.24124	High
dead	97	2.66364	Low
dead	97	3.50456	Low
dead	761	5.78047	High
dead	761	4.37102	High
dead	761	3.82156	High
live	1130	3.56238	Low
live	1163	2.29016	Low
live	1183	2.96811	Low
live	1183	3.49604	Low
live	1036	3.22137	Low
live	1036	1.56164	Low
live	1036	2.03221	Low
dead	1026	3.59386	High
dead	808	3.7986	High
dead	808	1.72897	Low
live	1013	4.9213	High
live	863	4.37598	High
live	852	2.54614	Low
live	852	1.54265	Low
live	852	2.18552	Low
live	595	3.66125	High
live	728	3.28388	Low
live	728	2.57061	Low
live	728	2.75253	Low
live	845	2.69586	Low
live	845	1.778	Low
live	845	1.2364	Low
live	704	1.42616	Low
live	658	3.21168	Low
live	705	4.44206	High
live	705	3.99108	High
live	705	2.33362	Low
live	2616	2.02772	Low
dead	987	2.79467	Low
live	1864	4.50115	High
dead	500	5.02717	High
live	691	1.75894	Low
live	592	4.13523	High
dead	557	5.18693	High
live	218	4.35229	High
live	1097	6.2373	High
dead	574	5.92182	High
live	882	6.01205	High
live	889	2.8863	Low
live	719	3.29706	Low
live	385	3.06908	Low
live	285	3.77979	High
live	260	3.31457	Low
live	486	3.46651	Low
live	466	4.08265	High
live	287	3.14112	Low
live	351	2.95103	Low
live	415	3.76471	High
dead	409	3.07979	Low
dead	2318	1.41164	Low
dead	855	4.2951	High
dead	869	3.40219	Low
dead	385	2.98743	Low
dead	1081	4.12567	High
dead	1421	2.18495	Low
dead	428	2.55528	Low
dead	999	4.01373	High
dead	268	4.27771	High
dead	896	1.42218	Low
dead	905	2.82615	Low
live	1700	4.22719	High
dead	488	4.76751	High
live	1621	5.13553	High
live	1683	3.00214	Low
live	522	4.40722	High
live	354	4.1398	High
live	677	4.56335	High
dead	677	3.54418	Low
live	4765	4.35292	High
live	2224	3.27462	Low
live	1893	4.51583	High
dead	879	3.25072	Low
dead	260	5.34229	High
dead	1229	4.91272	High
dead	1135	3.07574	Low
live	3759	3.92118	High
live	6732	2.68421	Low
live	4992	2.12181	Low
dead	300	4.26635	High
dead	624	4.36937	High
dead	2174	3.16538	Low
live	3094	3.29038	Low
dead	478	4.05662	High
dead	1830	2.92488	Low
live	1442	3.64356	High
live	1442	4.70869	High
dead	1499	2.20664	Low
dead	250	5.81689	High
dead	282	2.86221	Low
dead	434	4.99141	High
dead	1235	3.55724	Low
dead	2393	4.84962	High
dead	653	2.76477	Low
dead	257	4.60112	High
dead	460	4.16029	High
live	1474	4.15381	High
live	1847	1.94295	Low
live	1750	2.44353	Low
live	1617	5.4736	High
live	1617	4.81123	High
dead	1288	4.78676	High
dead	119	5.69304	High
dead	777	4.89102	High
dead	336	4.9723	High
dead	370	4.96066	High
dead	189	5.49299	High
dead	1268	1.38962	Low
dead	22	3.90446	High
dead	308	3.51128	Low
live	1125	1.53107	Low
live	1119	2.68921	Low
live	829	2.65109	Low
dead	1043	5.64165	High
dead	929	3.11288	Low
live	424	2.46019	Low
live	1071	4.24717	High
dead	701	3.93336	High
live	1178	4.53457	High
live	1479	3.4486	Low
live	2065	5.08828	High
live	930	4.94497	High
live	435	1.97849	Low
live	2449	2.51758	Low
dead	171	3.73773	High
dead	1293	5.4116	High
live	1239	3.84095	High
dead	464	3.63972	High
live	1400	3.18307	Low
dead	1632	2.14545	Low
dead	118	5.24396	High
dead	176	4.84643	High
dead	237	3.80179	High
live	2109	1.93493	Low
dead	1379	3.68558	High
dead	995	4.01518	High
live	2823	2.623	Low
dead	760	3.79419	High
live	1233	3.86131	High
live	3261	3.05198	Low
live	2137	3.21557	Low
dead	952	3.13305	Low
live	872	2.8928	Low
live	609	3.73391	High
dead	243	3.11121	Low
live	824	5.75534	High
live	487	2.39613	Low
dead	995	3.09677	Low
live	670	3.68197	High
live	705	3.3412	Low
live	442	1.93365	Low
live	652	4.77185	High
live	119	3.48872	Low
live	704	3.01037	Low
live	773	2.9602	Low
dead	468	2.58782	Low
live	567	4.23058	High
dead	343	3.60103	High
live	1040	3.80556	High
live	537	4.17761	High
dead	561	4.54781	High
dead	187	2.26129	Low
live	603	4.88378	High
live	889	5.28007	High
live	904	4.48679	High
live	462	1.98736	Low
dead	702	4.48567	High
dead	598	3.39259	Low
live	600	2.46506	Low
dead	154	3.5623	Low
live	541	3.71789	High
dead	719	3.45298	Low
live	476	2.27259	Low
live	547	3.75102	High
live	515	3.55129	Low
live	599	5.3222	High
live	888	2.15843	Low
live	977	1.42562	Low
live	674	3.33444	Low
dead	469	3.9706	High
live	534	3.82142	High
live	478	4.35269	High
live	440	4.08716	High
live	11	4.7699	High
live	418	4.29154	High
live	617	3.39825	Low
live	539	3.68997	High
live	552	4.57757	High
dead	607	2.22774	Low
live	791	2.49075	Low
live	520	2.42086	Low
live	536	3.90565	High
live	446	3.35455	Low
live	48	3.00556	Low
live	416	2.73147	Low
dead	375	5.55711	High
live	515	2.89769	Low
live	689	3.23645	Low
live	630	3.50848	Low
live	651	3.61517	High
dead	99	5.01538	High
live	626	1.97735	Low
live	596	1.67157	Low
live	28	6.09828	High
live	481	4.31822	High
dead	614	4.92081	High
live	608	2.3197	Low
live	546	3.03865	Low
dead	139	4.55513	High
live	1216	2.26571	Low
live	1289	1.32008	Low
dead	444	5.40197	High
live	2696	3.70837	High
dead	1498	4.25966	High
dead	1454	4.67263	High
dead	594	2.18865	Low
dead	1725	3.24275	Low
dead	1653	2.1173	Low
live	2067	3.61893	High
live	2199	2.56203	Low
dead	414	3.19683	Low
dead	1194	3.44582	Low
live	1246	4.60198	High
live	910	3.82177	High
live	1728	2.98896	Low
dead	628	3.16216	Low
live	1189	4.03872	High
live	2488	4.53635	High
live	1126	2.40081	Low
dead	1167	2.90626	Low
live	2676	5.27375	High
dead	62	5.08264	High
live	1305	2.85748	Low
live	864	3.18303	Low
live	1559	3.52247	Low
live	866	3.65628	High
live	610	1.70097	Low
live	610	3.51276	Low
live	573	2.37835	Low
live	427	1.62377	Low
live	385	2.37387	Low
live	448	2.13169	Low
live	174	3.75481	High
live	141	2.76613	Low
live	422	1.87015	Low
live	202	3.79144	High
live	186	3.97849	High
live	690	2.25776	Low
live	414	2.47516	Low
live	165	3.16551	Low
live	230	5.30609	High
live	184	4.31623	High
live	134	3.85293	High
live	408	3.82323	High
live	411	3.24565	Low
live	426	2.57126	Low
live	409	4.13012	High
live	129	5.04637	High
live	813	3.86133	High
live	591	3.93657	High
live	256	3.15249	Low
dead	210	4.45045	High
dead	1600	3.44887	Low
dead	711	4.50181	High
live	2515	2.81332	Low
live	800	5.85791	High
live	467	4.21773	High
live	131	5.232	High
dead	922	3.27657	Low
dead	281	4.57379	High
dead	38	1.81073	Low
live	1189	1.93716	Low
dead	1531	4.12026	High
dead	340	4.59978	High
dead		4.33299	High
dead	2027	5.23091	High
live		5.26842	High
live	2368	1.82847	Low
live	1333	4.27456	High
live		1.83552	Low
dead		4.19166	High
live	2590	1.17989	Low
dead		4.29006	High
dead		3.95583	High
dead	1516	2.39199	Low
dead	1115	4.99011	High
live	3305	2.25281	Low
live	3059	5.19682	High
live		2.02591	Low
live		3.74291	High
dead	4961	4.39793	High
dead	826	4.0678	High
dead	173	5.88528	High
dead	586	3.68151	High
dead	626	4.07059	High
live	3940	2.20433	Low
dead	666	5.07307	High
dead	1215	3.43389	Low
live	3635	2.58138	Low
dead	593	5.02068	High
dead	1171	6.21372	High
dead	976	1.86845	Low
dead	179	3.07365	Low
live	1974	4.25688	High
dead	697	4.24976	High
dead	291	2.2122	Low
dead	3169	1.90254	Low
live	7248	1.81262	Low
dead	258	3.05048	Low
dead	2681	1.31956	Low
dead	807	4.98324	High
dead	949	3.68732	High
dead	244	4.95541	High
dead	1622	1.74106	Low
live	791	2.05731	Low
dead	1197	2.88098	Low
dead	321	5.97037	High
dead	1528	2.18177	Low
live	7062	4.74482	High
dead	1209	2.98202	Low
live	2360	3.27005	Low
dead	321	5.39997	High
dead	3361	4.6668	High
live		4.16701	High
live	2832	4.06302	High
live	2595	5.05351	High
live	824	5.48003	High
dead	376	3.68388	High
live	179	3.22268	Low
live	947	4.48054	High
dead	1046	4.52966	High
live	1157	4.62215	High
dead	625	2.67593	Low
live	997	5.59476	High
live	605	4.4323	High
live	1072	5.23756	High
live	1148	5.07705	High
dead	124	3.95934	High
live	139	1.96938	Low
live	740	3.05235	Low
live	24	4.5736	High
dead	694	4.04398	High
live	993	2.05807	Low
live	944	3.53284	Low
live	949	3.87315	High
live	701	2.97308	Low
live	0	2.14303	Low
live	653	6.53732	High
dead	444	3.33982	Low
live	353	4.33121	High
live	423	3.07733	Low
live	938	2.89616	Low
live	839	3.18653	Low
dead	19	4.58813	High
live	862	3.77454	High
live	806	3.24025	Low
live	896	2.64141	Low
dead	116	5.46879	High
dead	737	4.40102	High
live	415	3.2719	Low
live	805	1.87129	Low
live	323	3.60722	High
dead	1258	4.11383	High
live	60	3.42112	Low
live	310	4.87624	High
live	79	3.86731	High
live	417	5.80917	High
live	372	4.50197	High
live	842	4.3422	High
live	224	5.6714	High
live	35	1.18789	Low
live	492	2.44522	Low
live	505	1.81721	Low
dead	434	1.95453	Low
live	36	5.24004	High
live	44	3.89626	High
live	603	1.61636	Low
live	683	3.00317	Low
live	531	2.5634	Low
live	186	5.06827	High
live	718	4.37739	High
dead	33	3.09229	Low
live	578	3.86599	High
live	526	4.02318	High
live	1272	4.51361	High
dead	503	4.19885	High
dead	87	4.44655	High
live	568	3.54504	Low
live	377	4.53659	High
live	477	5.24941	High
live	476	2.98381	Low
live	830	3.29182	Low
live	84	5.09665	High
live	651	3.72612	High
live	553	5.02858	High
live	605	3.84731	High
live	1285	2.78494	Low
live	1965	1.93667	Low
live	1932	2.58017	Low
live	1870	3.31129	Low
live	775	2.91244	Low
live	564	3.42485	Low
dead	18	1.78906	Low
live	484	2.76269	Low
live	568	2.47576	Low
live	545	2.21757	Low
dead	164	2.07015	Low
live	551	3.21014	Low
dead	468	5.47895	High
live	499	2.90658	Low
live	435	4.18764	High
live	657	3.27371	Low
live	626	1.68912	Low
live	614	3.81808	High
live	652	2.85192	Low
live	601	2.49797	Low
live	624	2.40893	Low
live	540	2.21282	Low
live	634	3.7377	High
live	568	3.05169	Low
live	629	3.30864	Low
live	747	2.849	Low
live	1060	3.93631	High
live	1118	2.15416	Low
live	44	3.20474	Low
dead	656	5.36932	High
live	658	2.00838	Low
live	739	2.39898	Low
live	724	1.79123	Low
dead	550	4.27462	High
live	1079	2.23958	Low
live	988	2.32392	Low
live	578	3.99646	High
live	435	1.99114	Low
dead	193	2.2306	Low
live	307	2.86152	Low
dead	442	2.5581	Low
dead	58	4.68778	High
live	664	3.69286	High
live	565	4.13316	High
live	476	4.38742	High
live	827	4.70767	High
live	1175	3.34092	Low
live	84	3.804	High
dead	2620	4.81046	High
dead	1778	4.4895	High
dead	1501	3.71532	High
dead	2617	3.85322	High
dead	1790	2.97449	Low
dead	167	4.15643	High
dead	161	4.24806	High
dead	1265	3.59827	High
dead	950	6.28765	High
dead	74	4.79267	High
dead	307	3.54483	Low
dead	896	3.95971	High
dead	336	3.73827	High
live	741	2.03154	Low
dead	429	4.94202	High
dead	339	3.199	Low
dead	582	4.20486	High
live	2248	2.73485	Low
live	2161	3.0339	Low
live	2261	2.9348	Low
dead	4	3.48063	Low
live	50	4.63008	High
live	1432	3.82265	High
live	15	2.54735	Low
live	13	3.37167	Low
live	603	3.34026	Low
live	617	2.61843	Low
dead	1798	3.10262	Low
live	513	2.1903	Low
