# Supplementary material for: PLK1 overexpression as a dual-role biomarker and therapeutic vulnerability in pulmonary adenocarcinoma
Source: PeerJ journal article supplement (doi:10.7717/peerj.20618), 2026-01-15
Supplement: additional_files.tar [file Figure 4A related data.xlsx]

## Sheet: sheet1
sample_id	event	time	PLK1	RiskScore
TCGA-05-4244-01A-01R-1107-07	live	0	High	1.23075
TCGA-05-4249-01A-01R-1107-07	live	1523	Low	0
TCGA-05-4250-01A-01R-1107-07	dead	121	High	1.94413
TCGA-05-4382-01A-01R-1206-07	live	607	High	0.448954
TCGA-05-4384-01A-01R-1755-07	live	426	Low	0.781799
TCGA-05-4389-01A-01R-1206-07	live	1369	High	0.448954
TCGA-05-4390-01A-02R-1755-07	live	1126	High	0.448954
TCGA-05-4395-01A-01R-1206-07	dead	0	High	1.94413
TCGA-05-4396-01A-21R-1858-07	dead	303	Low	1.49518
TCGA-05-4397-01A-01R-1206-07	dead	731	High	1.23075
TCGA-05-4398-01A-01R-1206-07	live	1431	High	1.94413
TCGA-05-4402-01A-01R-1206-07	dead	244	High
TCGA-05-4403-01A-01R-1206-07	live	578	Low	0
TCGA-05-4405-01A-21R-1858-07	live	610	Low	0
TCGA-05-4410-01A-21R-1858-07	live	0	Low	0
TCGA-05-4415-01A-22R-1858-07	dead	91	High	1.94413
TCGA-05-4417-01A-22R-1858-07	live	455	Low	0
TCGA-05-4418-01A-01R-1206-07	dead	274	Low	1.49518
TCGA-05-4420-01A-01R-1206-07	live	912	High	0.448954
TCGA-05-4422-01A-01R-1206-07	live	365	Low	0
TCGA-05-4424-01A-22R-1858-07	live	913	High	1.16233
TCGA-05-4425-01A-01R-1755-07	live	669	High	0.448954
TCGA-05-4426-01A-01R-1206-07	live	791	Low	0
TCGA-05-4427-01A-21R-1858-07	live	791	High	1.23075
TCGA-05-4430-01A-02R-1206-07	live	761	High	0.448954
TCGA-05-4432-01A-01R-1206-07	live	761	High	1.23075
TCGA-05-4433-01A-22R-1858-07	live	730	High	0.448954
TCGA-05-4434-01A-01R-1206-07	dead	457	High	1.94413
TCGA-05-5420-01A-01R-1628-07	live	457	Low	0.781799
TCGA-05-5423-01A-01R-1628-07	live	151	Low	0.781799
TCGA-05-5425-01A-02R-1628-07	live	882	High	1.23075
TCGA-05-5428-01A-01R-1628-07	live	670	High	1.23075
TCGA-05-5429-01A-01R-1628-07	dead	275	High	1.94413
TCGA-05-5715-01A-01R-1628-07	live	62	High	0.448954
TCGA-35-3615-01A-01R-0946-07	live	14	Low	0
TCGA-35-4122-01A-01R-1107-07	live	225	High	0.448954
TCGA-35-4123-01A-01R-1107-07	live	182	Low	0
TCGA-35-5375-01A-01R-1628-07	live	264	Low	0.781799
TCGA-38-4625-01A-01R-1206-07	live	2973	High	0.448954
TCGA-38-4626-01A-01R-1206-07	live	3674	Low	0
TCGA-38-4627-01A-01R-1206-07	dead	1147	Low	0.781799
TCGA-38-4628-01A-01R-1206-07	dead	1492	High	1.23075
TCGA-38-4629-01A-02R-1206-07	dead	864	High	1.16233
TCGA-38-4630-01A-01R-1206-07	dead	1073	High	0.448954
TCGA-38-4631-01A-01R-1755-07	dead	354	High	0.448954
TCGA-38-4632-01A-01R-1755-07	dead	1357	High	1.23075
TCGA-38-6178-01A-11R-1755-07	live	448	High	1.23075
TCGA-38-7271-01A-11R-2039-07	dead	800	Low	0
TCGA-38-A44F-01A-11R-A24H-07	live	133	Low	0
TCGA-44-2655-01A-01R-0946-07	live	1324	Low	0
TCGA-44-2656-01A-02R-0946-07	live	1429	Low	0
TCGA-44-2656-01A-02R-A278-07	live	1429	Low	0
TCGA-44-2656-01B-06R-A277-07	live	1429	Low	0
TCGA-44-2657-01A-01R-1107-07	live	1351	Low
TCGA-44-2659-01A-01R-0946-07	live	1367	Low	0.781799
TCGA-44-2661-01A-01R-1107-07	live	1159	Low	0
TCGA-44-2662-01A-01R-0946-07	live	1280	High	0.448954
TCGA-44-2662-01A-01R-A278-07	live	1280	High	0.448954
TCGA-44-2662-01B-02R-A277-07	live	1280	Low	0
TCGA-44-2665-01A-01R-0946-07	live	1301	Low	0.781799
TCGA-44-2665-01B-06R-A277-07	live	1301	Low	0.781799
TCGA-44-2666-01A-01R-0946-07	dead	97	High	0.448954
TCGA-44-2666-01A-01R-A278-07	dead	97	Low	0
TCGA-44-2666-01B-02R-A277-07	dead	97	Low	0
TCGA-44-2668-01A-01R-0946-07	dead	761	High	0.448954
TCGA-44-2668-01A-01R-A278-07	dead	761	High	0.448954
TCGA-44-2668-01B-02R-A277-07	dead	761	High	0.448954
TCGA-44-3396-01A-01R-1206-07	live	1130	Low	0.781799
TCGA-44-3398-01A-01R-1107-07	live	1163	Low	0
TCGA-44-3917-01A-01R-A278-07	live	1183	Low	0
TCGA-44-3917-01B-02R-A277-07	live	1183	Low	0
TCGA-44-3918-01A-01R-1107-07	live	1036	Low	0
TCGA-44-3918-01A-01R-A278-07	live	1036	Low	0
TCGA-44-3918-01B-02R-A277-07	live	1036	Low	0
TCGA-44-3919-01A-02R-1107-07	dead	1026	High	0.448954
TCGA-44-4112-01A-01R-1107-07	dead	808	High	0.448954
TCGA-44-4112-01B-06R-A277-07	dead	808	Low	0
TCGA-44-5643-01A-01R-1628-07	live	1013	High	1.23075
TCGA-44-5644-01A-21R-2039-07	live	863	High	0.448954
TCGA-44-5645-01A-01R-1628-07	live	852	Low
TCGA-44-5645-01A-01R-A278-07	live	852	Low
TCGA-44-5645-01B-04R-A277-07	live	852	Low
TCGA-44-6145-01A-11R-1755-07	live	595	High	0.448954
TCGA-44-6146-01A-11R-1755-07	live	728	Low	0.713376
TCGA-44-6146-01A-11R-A278-07	live	728	Low	0.713376
TCGA-44-6146-01B-04R-A277-07	live	728	Low	0.713376
TCGA-44-6147-01A-11R-1755-07	live	845	Low
TCGA-44-6147-01A-11R-A278-07	live	845	Low
TCGA-44-6147-01B-06R-A277-07	live	845	Low
TCGA-44-6148-01A-11R-1755-07	live	704	Low	0
TCGA-44-6774-01A-21R-1858-07	live	658	Low	0.781799
TCGA-44-6775-01A-11R-1858-07	live	705	High	0.448954
TCGA-44-6775-01A-11R-A278-07	live	705	High	0.448954
TCGA-44-6775-01C-02R-A277-07	live	705	Low	0
TCGA-44-6776-01A-11R-1858-07	live	2616	Low	0
TCGA-44-6777-01A-11R-1858-07	dead	987	Low
TCGA-44-6778-01A-11R-1858-07	live	1864	High	0.448954
TCGA-44-6779-01A-11R-1858-07	dead	500	High	1.23075
TCGA-44-7659-01A-11R-2066-07	live	691	Low	0
TCGA-44-7660-01A-11R-2066-07	live	592	High	0.448954
TCGA-44-7661-01A-11R-2066-07	dead	557	High	0.448954
TCGA-44-7662-01A-11R-2066-07	live	218	High	0.448954
TCGA-44-7667-01A-31R-2066-07	live	1097	High	1.16233
TCGA-44-7669-01A-21R-2066-07	dead	574	High	1.23075
TCGA-44-7670-01A-11R-2066-07	live	882	High	1.23075
TCGA-44-7671-01A-11R-2066-07	live	889	Low	0
TCGA-44-7672-01A-11R-2066-07	live	719	Low	0
TCGA-44-8117-01A-11R-2241-07	live	385	Low	0
TCGA-44-8119-01A-11R-2241-07	live	285	High	1.16233
TCGA-44-8120-01A-11R-2241-07	live	260	Low	0
TCGA-44-A479-01A-31R-A24H-07	live	486	Low	0
TCGA-44-A47A-01A-21R-A24H-07	live	466	High	0.448954
TCGA-44-A47B-01A-11R-A24H-07	live	287	Low	0
TCGA-44-A47G-01A-21R-A24H-07	live	351	Low	0
TCGA-44-A4SS-01A-11R-A24X-07	live	415	High	0.448954
TCGA-44-A4SU-01A-11R-A24X-07	dead	409	Low	0
TCGA-49-4486-01A-01R-1206-07	dead	2318	Low	0
TCGA-49-4487-01A-21R-1858-07	dead	855	High	0.448954
TCGA-49-4488-01A-01R-1755-07	dead	869	Low	0
TCGA-49-4490-01A-21R-1858-07	dead	385	Low	1.49518
TCGA-49-4494-01A-01R-1206-07	dead	1081	High	1.94413
TCGA-49-4501-01A-01R-1206-07	dead	1421	Low	0
TCGA-49-4505-01A-01R-1206-07	dead	428	Low	0.781799
TCGA-49-4506-01A-01R-1206-07	dead	999	High	1.23075
TCGA-49-4507-01A-01R-1206-07	dead	268	High	1.94413
TCGA-49-4510-01A-01R-1206-07	dead	896	Low	0.781799
TCGA-49-4512-01A-21R-1858-07	dead	905	Low	0.781799
TCGA-49-4514-01A-21R-1858-07	live	1700	High	0.448954
TCGA-49-6742-01A-11R-1858-07	dead	488	High	1.23075
TCGA-49-6743-01A-11R-1858-07	live	1621	High	1.23075
TCGA-49-6744-01A-11R-1858-07	live	1683	Low	0.781799
TCGA-49-6745-01A-11R-1858-07	live	522	High	1.23075
TCGA-49-6761-01A-31R-1949-07	live	354	High	1.23075
TCGA-49-6767-01A-11R-1858-07	live	677	High	1.16233
TCGA-49-AAQV-01A-11R-A39D-07	dead	677	Low	0.781799
TCGA-49-AAR0-01A-21R-A39D-07	live	4765	High	0.448954
TCGA-49-AAR2-01A-11R-A39D-07	live	2224	Low	0
TCGA-49-AAR3-01A-11R-A41B-07	live	1893	High	1.23075
TCGA-49-AAR4-01A-12R-A41B-07	dead	879	Low	0.781799
TCGA-49-AAR9-01A-21R-A41B-07	dead	260	High	1.16233
TCGA-49-AARE-01A-11R-A41B-07	dead	1229	High	0.448954
TCGA-49-AARN-01A-21R-A41B-07	dead	1135	Low	0
TCGA-49-AARO-01A-12R-A41B-07	live	3759	High	0.448954
TCGA-49-AARQ-01A-11R-A41B-07	live	6732	Low	0
TCGA-49-AARR-01A-11R-A41B-07	live	4992	Low	0
TCGA-4B-A93V-01A-11R-A39D-07	dead	300	High	0.448954
TCGA-50-5044-01A-21R-1858-07	dead	624	High	1.94413
TCGA-50-5045-01A-01R-1628-07	dead	2174	Low	0.781799
TCGA-50-5049-01A-01R-1628-07	live	3094	Low	0
TCGA-50-5051-01A-21R-1858-07	dead	478	High	1.23075
TCGA-50-5055-01A-01R-1628-07	dead	1830	Low	0.781799
TCGA-50-5066-01A-01R-1628-07	live	1442	High	0.448954
TCGA-50-5066-02A-11R-2090-07	live	1442	High	0.448954
TCGA-50-5068-01A-01R-1628-07	dead	1499	Low	0.781799
TCGA-50-5072-01A-21R-1858-07	dead	250	High	1.23075
TCGA-50-5930-01A-11R-1755-07	dead	282	Low	0.781799
TCGA-50-5931-01A-11R-1755-07	dead	434	High	0.448954
TCGA-50-5932-01A-11R-1755-07	dead	1235	Low	0.781799
TCGA-50-5933-01A-11R-1755-07	dead	2393	High	1.94413
TCGA-50-5935-01A-11R-1755-07	dead	653	Low	0
TCGA-50-5936-01A-11R-1628-07	dead	257	High	1.23075
TCGA-50-5939-01A-11R-1628-07	dead	460	High	0.448954
TCGA-50-5941-01A-11R-1755-07	live	1474	High	1.23075
TCGA-50-5942-01A-21R-1755-07	live	1847	Low	0
TCGA-50-5944-01A-11R-1755-07	live	1750	Low	0
TCGA-50-5946-01A-11R-1755-07	live	1617	High	0.448954
TCGA-50-5946-02A-11R-2090-07	live	1617	High	0.448954
TCGA-50-6590-01A-12R-1858-07	dead	1288	High	0.448954
TCGA-50-6591-01A-11R-1755-07	dead	119	High	0.448954
TCGA-50-6592-01A-11R-1755-07	dead	777	High	0.448954
TCGA-50-6593-01A-11R-1755-07	dead	336	High	1.23075
TCGA-50-6594-01A-11R-1755-07	dead	370	High	1.94413
TCGA-50-6595-01A-12R-1858-07	dead	189	High	1.23075
TCGA-50-6597-01A-11R-1858-07	dead	1268	Low	0
TCGA-50-6673-01A-11R-1949-07	dead	22	High	0.448954
TCGA-50-7109-01A-11R-2039-07	dead	308	Low	0
TCGA-50-8457-01A-11R-2326-07	live	1125	Low	0
TCGA-50-8459-01A-11R-2326-07	live	1119	Low	0.713376
TCGA-50-8460-01A-11R-2326-07	live	829	Low	0
TCGA-53-7624-01A-11R-2066-07	dead	1043	High	0.448954
TCGA-53-7626-01A-12R-2066-07	dead	929	Low	0.781799
TCGA-53-7813-01A-11R-2170-07	live	424	Low	0.713376
TCGA-53-A4EZ-01A-12R-A24X-07	live	1071	High	1.23075
TCGA-55-1592-01A-01R-0946-07	dead	701	High	0.448954
TCGA-55-1594-01A-01R-0946-07	live	1178	High	1.23075
TCGA-55-1595-01A-01R-0946-07	live	1479	Low	0
TCGA-55-1596-01A-01R-0946-07	live	2065	High	1.23075
TCGA-55-5899-01A-11R-1628-07	live	930	High	1.23075
TCGA-55-6543-01A-11R-1755-07	live	435	Low	0
TCGA-55-6642-01A-11R-1858-07	live	2449	Low	0
TCGA-55-6712-01A-11R-1858-07	dead	171	High	1.23075
TCGA-55-6968-01A-11R-1949-07	dead	1293	High	0.448954
TCGA-55-6969-01A-11R-1949-07	live	1239	High	0.448954
TCGA-55-6970-01A-11R-1949-07	dead	464	High	1.23075
TCGA-55-6971-01A-11R-1949-07	live	1400	Low	0
TCGA-55-6972-01A-11R-1949-07	dead	1632	Low	0
TCGA-55-6975-01A-11R-1949-07	dead	118	High	1.23075
TCGA-55-6978-01A-11R-1949-07	dead	176	High	0.448954
TCGA-55-6979-01A-11R-1949-07	dead	237	High	1.23075
TCGA-55-6980-01A-11R-1949-07	live	2109	Low	0
TCGA-55-6981-01A-11R-1949-07	dead	1379	High	1.23075
TCGA-55-6982-01A-11R-1949-07	dead	995	High	1.23075
TCGA-55-6983-01A-11R-1949-07	live	2823	Low	0.781799
TCGA-55-6984-01A-11R-1949-07	dead	760	High	1.23075
TCGA-55-6985-01A-11R-1949-07	live	1233	High	0.448954
TCGA-55-6986-01A-11R-1949-07	live	3261	Low	0
TCGA-55-6987-01A-11R-1949-07	live	2137	Low	0
TCGA-55-7227-01A-11R-2039-07	dead	952	Low	1.49518
TCGA-55-7281-01A-11R-2039-07	live	872	Low	0
TCGA-55-7283-01A-11R-2039-07	live	609	High	1.94413
TCGA-55-7284-01B-11R-2241-07	dead	243	Low	0.713376
TCGA-55-7570-01A-11R-2039-07	live	824	High	0.448954
TCGA-55-7573-01A-11R-2039-07	live	487	Low	0
TCGA-55-7574-01A-11R-2039-07	dead	995	Low	0
TCGA-55-7576-01A-11R-2066-07	live	670	High	0.448954
TCGA-55-7724-01A-11R-2170-07	live	705	Low	0
TCGA-55-7725-01A-11R-2170-07	live	442	Low	0
TCGA-55-7726-01A-11R-2170-07	live	652	High	0.448954
TCGA-55-7727-01A-11R-2170-07	live	119	Low	0.781799
TCGA-55-7728-01A-11R-2187-07	live	704	Low	0
TCGA-55-7815-01A-11R-2170-07	live	773	Low	0
TCGA-55-7816-01A-11R-2170-07	dead	468	Low
TCGA-55-7903-01A-11R-2170-07	live	567	High	0.448954
TCGA-55-7907-01A-11R-2170-07	dead	343	High	1.23075
TCGA-55-7910-01A-11R-2170-07	live	1040	High	0.448954
TCGA-55-7911-01A-11R-2170-07	live	537	High	0.448954
TCGA-55-7913-01B-11R-2241-07	dead	561	High	0.448954
TCGA-55-7914-01A-11R-2170-07	dead	187	Low	0.781799
TCGA-55-7994-01A-11R-2187-07	live	603	High	1.16233
TCGA-55-7995-01A-11R-2187-07	live	889	High	0.448954
TCGA-55-8085-01A-11R-2241-07	live	904	High	0.448954
TCGA-55-8087-01A-11R-2241-07	live	462	Low	0
TCGA-55-8089-01A-11R-2241-07	dead	702	High	0.448954
TCGA-55-8090-01A-11R-2241-07	dead	598	Low	0
TCGA-55-8091-01A-11R-2241-07	live	600	Low	0
TCGA-55-8092-01A-11R-2241-07	dead	154	Low	0.713376
TCGA-55-8094-01A-11R-2241-07	live	541	High	0.448954
TCGA-55-8096-01A-11R-2241-07	dead	719	Low	0
TCGA-55-8097-01A-11R-2241-07	live	476	Low	0
TCGA-55-8203-01A-11R-2241-07	live	547	High	0.448954
TCGA-55-8204-01A-11R-2241-07	live	515	Low	0
TCGA-55-8205-01A-11R-2241-07	live	599	High	0.448954
TCGA-55-8206-01A-11R-2241-07	live	888	Low	0
TCGA-55-8207-01A-11R-2241-07	live	977	Low	0
TCGA-55-8208-01A-11R-2241-07	live	674	Low	0
TCGA-55-8299-01A-11R-2287-07	dead	469	High	0.448954
TCGA-55-8301-01A-11R-2287-07	live	534	High	0.448954
TCGA-55-8302-01A-11R-2326-07	live	478	High	0.448954
TCGA-55-8505-01A-11R-2403-07	live	440	High	1.23075
TCGA-55-8506-01A-11R-2403-07	live	11	High	1.16233
TCGA-55-8507-01A-11R-2403-07	live	418	High	0.448954
TCGA-55-8508-01A-11R-2403-07	live	617	Low	0.781799
TCGA-55-8510-01A-11R-2403-07	live	539	High	0.448954
TCGA-55-8511-01A-11R-2403-07	live	552	High	0.448954
TCGA-55-8512-01A-11R-2403-07	dead	607	Low	0.781799
TCGA-55-8513-01A-11R-2403-07	live	791	Low	0.713376
TCGA-55-8514-01A-11R-2403-07	live	520	Low	0
TCGA-55-8614-01A-11R-2403-07	live	536	High	0.448954
TCGA-55-8615-01A-11R-2403-07	live	446	Low	1.49518
TCGA-55-8616-01A-11R-2403-07	live	48	Low	0
TCGA-55-8619-01A-11R-2403-07	live	416	Low	0.713376
TCGA-55-8620-01A-11R-2403-07	dead	375	High	1.23075
TCGA-55-8621-01A-11R-2403-07	live	515	Low	0
TCGA-55-A48X-01A-11R-A24H-07	live	689	Low	0.781799
TCGA-55-A48Y-01A-11R-A24H-07	live	630	Low	0
TCGA-55-A48Z-01A-12R-A24X-07	live	651	High	1.23075
TCGA-55-A490-01A-11R-A466-07	dead	99	High	0.448954
TCGA-55-A491-01A-11R-A24H-07	live	626	Low	0
TCGA-55-A492-01A-11R-A24H-07	live	596	Low	0
TCGA-55-A493-01A-11R-A24H-07	live	28	High	0.448954
TCGA-55-A494-01A-11R-A24X-07	live	481	High	0.448954
TCGA-55-A4DF-01A-11R-A24H-07	dead	614	High	0.448954
TCGA-55-A4DG-01A-11R-A24H-07	live	608	Low	0
TCGA-55-A57B-01A-12R-A39D-07	live	546	Low	0
TCGA-62-8394-01A-11R-2326-07	dead	139	High	1.94413
TCGA-62-8395-01A-11R-2326-07	live	1216	Low	0.713376
TCGA-62-8397-01A-11R-2326-07	live	1289	Low	0.713376
TCGA-62-8398-01A-11R-2326-07	dead	444	High	1.23075
TCGA-62-8399-01A-21R-2326-07	live	2696	High	1.23075
TCGA-62-8402-01A-11R-2326-07	dead	1498	High	1.23075
TCGA-62-A46O-01A-11R-A24H-07	dead	1454	High	0.448954
TCGA-62-A46P-01A-11R-A24H-07	dead	594	Low	0
TCGA-62-A46R-01A-11R-A24H-07	dead	1725	Low	0
TCGA-62-A46S-01A-11R-A24H-07	dead	1653	Low	0
TCGA-62-A46U-01A-11R-A24H-07	live	2067	High	1.23075
TCGA-62-A46V-01A-11R-A24H-07	live	2199	Low	0
TCGA-62-A46Y-01A-11R-A24H-07	dead	414	Low	0.781799
TCGA-62-A470-01A-11R-A24H-07	dead	1194	Low	0
TCGA-62-A471-01A-12R-A24H-07	live	1246	High	1.23075
TCGA-62-A472-01A-11R-A24H-07	live	910	High	1.16233
TCGA-64-1676-01A-01R-0946-07	live	1728	Low	0
TCGA-64-1677-01A-01R-0946-07	dead	628	Low	0.781799
TCGA-64-1678-01A-01R-0946-07	live	1189	High	0.448954
TCGA-64-1679-01A-21R-2066-07	live	2488	High	1.23075
TCGA-64-1680-01A-02R-0946-07	live	1126	Low	0.781799
TCGA-64-1681-01A-11R-2066-07	dead	1167	Low	0
TCGA-64-5774-01A-01R-1628-07	live	2676	High	0.448954
TCGA-64-5775-01A-01R-1628-07	dead	62	High	1.16233
TCGA-64-5778-01A-01R-1628-07	live	1305	Low	0
TCGA-64-5779-01A-01R-1628-07	live	864	Low	0.781799
TCGA-64-5781-01A-01R-1628-07	live	1559	Low	0
TCGA-64-5815-01A-01R-1628-07	live	866	High	1.23075
TCGA-67-3770-01A-01R-0946-07	live	610	Low	0
TCGA-67-3771-01A-01R-0946-07	live	610	Low	0
TCGA-67-3772-01A-01R-0946-07	live	573	Low	0
TCGA-67-3773-01A-01R-0946-07	live	427	Low	0
TCGA-67-3774-01A-01R-0946-07	live	385	Low	0
TCGA-67-4679-01B-01R-1755-07	live	448	Low	0.713376
TCGA-67-6215-01A-11R-1755-07	live	174	High	0.448954
TCGA-67-6216-01A-11R-1755-07	live	141	Low	0
TCGA-67-6217-01A-11R-1755-07	live	422	Low	0.781799
TCGA-69-7760-01A-11R-2170-07	live	202	High	1.16233
TCGA-69-7761-01A-11R-2170-07	live	186	High	0.448954
TCGA-69-7763-01A-11R-2170-07	live	690	Low	0
TCGA-69-7764-01A-11R-2170-07	live	414	Low	0
TCGA-69-7765-01A-11R-2170-07	live	165	Low	0.713376
TCGA-69-7973-01A-11R-2187-07	live	230	High	0.448954
TCGA-69-7974-01A-11R-2187-07	live	184	High	1.23075
TCGA-69-7978-01A-11R-2187-07	live	134	High	1.23075
TCGA-69-7979-01A-11R-2187-07	live	408	High	0.448954
TCGA-69-7980-01A-11R-2187-07	live	411	Low	0
TCGA-69-8253-01A-11R-2287-07	live	426	Low	0.781799
TCGA-69-8254-01A-11R-2287-07	live	409	High
TCGA-69-8255-01A-11R-2287-07	live	129	High	0.448954
TCGA-69-8453-01A-12R-2326-07	live	813	High	1.16233
TCGA-69-A59K-01A-11R-A262-07	live	591	High	1.16233
TCGA-71-6725-01A-11R-1858-07	live	256	Low	0
TCGA-71-8520-01A-11R-2403-07	dead	210	High	0.448954
TCGA-73-4658-01A-01R-1755-07	dead	1600	Low	0
TCGA-73-4659-01A-01R-1206-07	dead	711	High	1.23075
TCGA-73-4662-01A-01R-1206-07	live	2515	Low	0
TCGA-73-4666-01A-01R-1206-07	live	800	High	0.448954
TCGA-73-4668-01A-01R-1206-07	live	467	High	1.23075
TCGA-73-4670-01A-01R-1206-07	live	131	High	0.448954
TCGA-73-4675-01A-01R-1206-07	dead	922	Low	1.49518
TCGA-73-4676-01A-01R-1755-07	dead	281	High	1.23075
TCGA-73-4677-01A-01R-1206-07	dead	38	Low	0
TCGA-73-7498-01A-12R-2187-07	live	1189	Low	0
TCGA-73-7499-01A-11R-2187-07	dead	1531	High	0.448954
TCGA-73-A9RS-01A-11R-A41B-07	dead	340	High	1.16233
TCGA-75-5125-01A-01R-1755-07	dead	2027	High	1.23075
TCGA-75-5146-01A-01R-1628-07	live	2368	Low	0
TCGA-75-5147-01A-01R-1628-07	live	1333	High	0.448954
TCGA-75-6206-01A-11R-1755-07	live	2590	Low	0
TCGA-75-6212-01A-11R-1755-07	dead	1516	Low	0.781799
TCGA-75-6214-01A-41R-1949-07	dead	1115	High	1.23075
TCGA-75-7025-01A-12R-1949-07	live	3305	Low	0
TCGA-75-7027-01A-11R-1949-07	live	3059	High	0.448954
TCGA-78-7143-01A-11R-2039-07	dead	4961	High	0.448954
TCGA-78-7145-01A-11R-2039-07	dead	826	High	1.94413
TCGA-78-7146-01A-11R-2039-07	dead	173	High	1.23075
TCGA-78-7147-01A-11R-2039-07	dead	586	High	1.23075
TCGA-78-7148-01A-11R-2039-07	dead	626	High	1.23075
TCGA-78-7149-01A-11R-2039-07	live	3940	Low	0.713376
TCGA-78-7150-01A-21R-2039-07	dead	666	High	1.23075
TCGA-78-7152-01A-11R-2039-07	dead	1215	Low	0
TCGA-78-7153-01A-11R-2039-07	live	3635	Low	0
TCGA-78-7154-01A-11R-2039-07	dead	593	High	1.94413
TCGA-78-7155-01A-11R-2039-07	dead	1171	High	0.448954
TCGA-78-7156-01A-11R-2039-07	dead	976	Low	1.49518
TCGA-78-7158-01A-11R-2039-07	dead	179	Low	1.49518
TCGA-78-7159-01A-11R-2039-07	live	1974	High
TCGA-78-7160-01A-11R-2039-07	dead	697	High	1.94413
TCGA-78-7161-01A-11R-2039-07	dead	291	Low	0.713376
TCGA-78-7162-01A-21R-2066-07	dead	3169	Low	0
TCGA-78-7163-01A-12R-2066-07	live	7248	Low	0
TCGA-78-7166-01A-12R-2066-07	dead	258	Low	0.781799
TCGA-78-7167-01A-11R-2066-07	dead	2681	Low	0
TCGA-78-7220-01A-11R-2039-07	dead	807	High	1.23075
TCGA-78-7535-01A-11R-2066-07	dead	949	High	0.448954
TCGA-78-7536-01A-11R-2066-07	dead	244	High	1.23075
TCGA-78-7537-01A-11R-2066-07	dead	1622	Low	0
TCGA-78-7539-01A-11R-2066-07	live	791	Low	0
TCGA-78-7540-01A-11R-2066-07	dead	1197	Low	0
TCGA-78-7542-01A-21R-2066-07	dead	321	High	0.448954
TCGA-78-7633-01A-11R-2066-07	dead	1528	Low	0
TCGA-78-8640-01A-11R-2403-07	live	7062	High	1.23075
TCGA-78-8648-01A-11R-2403-07	dead	1209	Low	0.713376
TCGA-78-8655-01A-11R-2403-07	live	2360	Low	0
TCGA-78-8660-01A-11R-2403-07	dead	321	High	1.23075
TCGA-78-8662-01A-11R-2403-07	dead	3361	High	0.448954
TCGA-80-5608-01A-31R-1949-07	live	2832	High	0.448954
TCGA-80-5611-01A-01R-1628-07	live	2595	High	0.448954
TCGA-83-5908-01A-21R-2287-07	live	824	High	0.448954
TCGA-86-6562-01A-11R-1755-07	dead	376	High	1.23075
TCGA-86-6851-01A-11R-1949-07	live	179	Low	0.781799
TCGA-86-7701-01A-11R-2170-07	live	947	High	0.448954
TCGA-86-7711-01A-11R-2066-07	dead	1046	High	1.23075
TCGA-86-7713-01A-11R-2066-07	live	1157	High	0.448954
TCGA-86-7714-01A-12R-2170-07	dead	625	Low	0.781799
TCGA-86-7953-01A-11R-2187-07	live	997	High	0.448954
TCGA-86-7954-01A-11R-2187-07	live	605	High	0.448954
TCGA-86-7955-01A-11R-2187-07	live	1072	High	0.448954
TCGA-86-8054-01A-11R-2241-07	live	1148	High	1.23075
TCGA-86-8055-01A-11R-2241-07	dead	124	High	1.23075
TCGA-86-8056-01A-11R-2241-07	live	139	Low	0.713376
TCGA-86-8073-01A-11R-2241-07	live	740	Low	0
TCGA-86-8074-01A-11R-2241-07	live	24	High	1.23075
TCGA-86-8075-01A-11R-2241-07	dead	694	High	0.448954
TCGA-86-8076-01A-31R-2241-07	live	993	Low	0
TCGA-86-8278-01A-11R-2287-07	live	944	Low	0.781799
TCGA-86-8279-01A-11R-2287-07	live	949	High	1.23075
TCGA-86-8280-01A-11R-2287-07	live	701	Low	0
TCGA-86-8281-01A-11R-2287-07	live	0	Low
TCGA-86-8358-01A-11R-2326-07	live	653	High	0.448954
TCGA-86-8359-01A-11R-2326-07	dead	444	Low	1.49518
TCGA-86-8585-01A-11R-2403-07	live	353	High	0.448954
TCGA-86-8668-01A-11R-2403-07	live	423	Low	0
TCGA-86-8669-01A-11R-2403-07	live	938	Low	0
TCGA-86-8671-01A-11R-2403-07	live	839	Low	0.781799
TCGA-86-8672-01A-21R-2403-07	dead	19	High	1.16233
TCGA-86-8673-01A-11R-2403-07	live	862	High	0.448954
TCGA-86-8674-01A-21R-2403-07	live	806	Low	0.781799
TCGA-86-A456-01A-11R-A24H-07	live	896	Low	0
TCGA-86-A4D0-01A-11R-A24H-07	dead	116	High	0.448954
TCGA-86-A4JF-01A-11R-A24X-07	dead	737	High	1.16233
TCGA-86-A4P7-01A-11R-A24X-07	live	415	Low	0
TCGA-86-A4P8-01A-11R-A24X-07	live	805	Low	0.781799
TCGA-91-6828-01A-11R-1858-07	live	323	High	0.448954
TCGA-91-6829-01A-21R-1858-07	dead	1258	High	0.448954
TCGA-91-6830-01A-11R-1949-07	live	60	Low	0.781799
TCGA-91-6831-01A-11R-1858-07	live	310	High	0.448954
TCGA-91-6835-01A-11R-1858-07	live	79	High	0.448954
TCGA-91-6836-01A-21R-1858-07	live	417	High	0.448954
TCGA-91-6840-01A-11R-1949-07	live	372	High	0.448954
TCGA-91-6847-01A-11R-1949-07	live	842	High	0.448954
TCGA-91-6848-01A-11R-1949-07	live	224	High	1.23075
TCGA-91-6849-01A-11R-1949-07	live	35	Low	0.781799
TCGA-91-7771-01A-11R-2170-07	live	492	Low	0.713376
TCGA-91-8496-01A-11R-2403-07	live	505	Low
TCGA-91-8497-01A-11R-2403-07	dead	434	Low	0
TCGA-91-8499-01A-11R-2403-07	live	36	High	0.448954
TCGA-91-A4BC-01A-11R-A24H-07	live	44	High	0.448954
TCGA-91-A4BD-01A-11R-A24H-07	live	603	Low	0.781799
TCGA-93-7347-01A-11R-2187-07	live	683	Low	0
TCGA-93-7348-01A-21R-2039-07	live	531	Low	0
TCGA-93-8067-01A-11R-2287-07	live	186	High	0.448954
TCGA-93-A4JN-01A-11R-A24X-07	live	718	High	0.448954
TCGA-93-A4JO-01A-21R-A24X-07	dead	33	Low	0
TCGA-93-A4JP-01A-11R-A24X-07	live	578	High
TCGA-93-A4JQ-01A-11R-A24X-07	live	526	High	0.448954
TCGA-95-7039-01A-11R-1949-07	live	1272	High	1.16233
TCGA-95-7043-01A-11R-1949-07	dead	503	High	0.448954
TCGA-95-7562-01A-11R-2241-07	dead	87	High	1.23075
TCGA-95-7567-01A-11R-2066-07	live	568	Low	0.781799
TCGA-95-7944-01A-11R-2187-07	live	377	High	0.448954
TCGA-95-7947-01A-11R-2187-07	live	477	High	0.448954
TCGA-95-7948-01A-11R-2187-07	live	476	Low	0
TCGA-95-8039-01A-11R-2241-07	live	830	Low	0
TCGA-95-8494-01A-11R-2326-07	live	84	High	1.23075
TCGA-95-A4VK-01A-11R-A262-07	live	651	High	1.23075
TCGA-95-A4VN-01A-11R-A262-07	live	553	High	1.23075
TCGA-95-A4VP-01A-21R-A262-07	live	605	High	1.23075
TCGA-97-7546-01A-11R-2039-07	live	1285	Low	0
TCGA-97-7547-01A-11R-2039-07	live	1965	Low	0
TCGA-97-7552-01A-11R-2039-07	live	1932	Low	0
TCGA-97-7553-01A-21R-2039-07	live	1870	Low	0
TCGA-97-7554-01A-11R-2039-07	live	775	Low	0.781799
TCGA-97-7937-01A-11R-2170-07	live	564	Low	0
TCGA-97-7938-01A-11R-2170-07	dead	18	Low	0
TCGA-97-7941-01A-11R-2187-07	live	484	Low	0
TCGA-97-8171-01A-11R-2287-07	live	568	Low	0.781799
TCGA-97-8172-01A-11R-2287-07	live	545	Low	0
TCGA-97-8174-01A-11R-2287-07	dead	164	Low	0
TCGA-97-8175-01A-11R-2287-07	live	551	Low	0
TCGA-97-8176-01A-11R-2403-07	dead	468	High	1.94413
TCGA-97-8177-01A-11R-2287-07	live	499	Low	0
TCGA-97-8179-01A-11R-2287-07	live	435	High	0.448954
TCGA-97-8547-01A-11R-2403-07	live	657	Low	0.781799
TCGA-97-8552-01A-11R-2403-07	live	626	Low	0
TCGA-97-A4LX-01A-11R-A24X-07	live	614	High	0.448954
TCGA-97-A4M0-01A-11R-A24X-07	live	652	Low	0
TCGA-97-A4M1-01A-11R-A24X-07	live	601	Low	0
TCGA-97-A4M2-01A-12R-A24X-07	live	624	Low	0
TCGA-97-A4M3-01A-11R-A24X-07	live	540	Low	0
TCGA-97-A4M5-01A-11R-A24X-07	live	634	High	0.448954
TCGA-97-A4M6-01A-11R-A24X-07	live	568	Low	0
TCGA-97-A4M7-01A-11R-A24X-07	live	629	Low	0
TCGA-99-7458-01A-11R-2039-07	live	747	Low	0.713376
TCGA-99-8025-01A-11R-2241-07	live	1060	High	1.94413
TCGA-99-8028-01A-11R-2241-07	live	1118	Low	0
TCGA-99-8032-01A-11R-2241-07	live	44	Low	0
TCGA-99-8033-01A-11R-2241-07	dead	656	High
TCGA-99-AA5R-01A-11R-A39D-07	live	658	Low	0
TCGA-J2-8192-01A-11R-2241-07	live	739	Low	0.781799
TCGA-J2-8194-01A-11R-2241-07	live	724	Low	0.713376
TCGA-J2-A4AD-01A-11R-A24H-07	dead	550	High	0.448954
TCGA-J2-A4AE-01A-21R-A24H-07	live	1079	Low	0
TCGA-J2-A4AG-01A-11R-A24H-07	live	988	Low	0
TCGA-L4-A4E5-01A-11R-A24X-07	live	578	High	0.448954
TCGA-L4-A4E6-01A-11R-A24H-07	live	435	Low	0
TCGA-L9-A443-01A-12R-A24H-07	dead	193	Low	0
TCGA-L9-A444-01A-21R-A24H-07	live	307	Low	0
TCGA-L9-A50W-01A-12R-A39D-07	dead	442	Low	0.781799
TCGA-L9-A5IP-01A-21R-A39D-07	dead	58	High	1.94413
TCGA-L9-A743-01A-43R-A39D-07	live	664	High	1.23075
TCGA-L9-A7SV-01A-11R-A39D-07	live	565	High	1.23075
TCGA-L9-A8F4-01A-11R-A39D-07	live	476	High	0.448954
TCGA-MN-A4N1-01A-11R-A24X-07	live	827	High	1.23075
TCGA-MN-A4N4-01A-12R-A24X-07	live	1175	Low	0
TCGA-MN-A4N5-01A-11R-A24X-07	live	84	High	0.448954
TCGA-MP-A4SV-01A-11R-A24X-07	dead	2620	High	0.448954
TCGA-MP-A4SW-01A-21R-A24X-07	dead	1778	High	1.23075
TCGA-MP-A4SY-01A-21R-A24X-07	dead	1501	High	1.23075
TCGA-MP-A4T4-01A-11R-A262-07	dead	2617	High	1.23075
TCGA-MP-A4T6-01A-32R-A262-07	dead	1790	Low	0.781799
TCGA-MP-A4T7-01A-11R-A24X-07	dead	167	High	0.448954
TCGA-MP-A4T8-01A-11R-A24X-07	dead	161	High	1.23075
TCGA-MP-A4T9-01A-11R-A24X-07	dead	1265	High	1.23075
TCGA-MP-A4TA-01A-21R-A24X-07	dead	950	High	0.448954
TCGA-MP-A4TC-01A-11R-A24X-07	dead	74	High	1.23075
TCGA-MP-A4TD-01A-32R-A262-07	dead	307	Low	0.781799
TCGA-MP-A4TE-01A-22R-A466-07	dead	896	High	0.448954
TCGA-MP-A4TF-01A-11R-A262-07	dead	336	High	0.448954
TCGA-MP-A4TH-01A-31R-A262-07	live	741	Low	0
TCGA-MP-A4TI-01A-21R-A24X-07	dead	429	High	1.23075
TCGA-MP-A4TJ-01A-51R-A262-07	dead	339	Low	0
TCGA-MP-A4TK-01A-11R-A24X-07	dead	582	High	1.23075
TCGA-MP-A5C7-01A-11R-A262-07	live	2248	Low	0
TCGA-NJ-A4YF-01A-12R-A262-07	live	2161	Low	0
TCGA-NJ-A4YG-01A-22R-A262-07	live	2261	Low	0
TCGA-NJ-A4YI-01A-11R-A262-07	dead	4	Low	0.781799
TCGA-NJ-A4YP-01A-11R-A262-07	live	50	High	0.448954
TCGA-NJ-A4YQ-01A-11R-A262-07	live	1432	High	0.448954
TCGA-NJ-A55A-01A-11R-A262-07	live	15	Low	0
TCGA-NJ-A55O-01A-11R-A262-07	live	13	Low	0.781799
TCGA-NJ-A55R-01A-11R-A262-07	live	603	Low	0
TCGA-NJ-A7XG-01A-12R-A39D-07	live	617	Low	1.49518
TCGA-O1-A52J-01A-11R-A262-07	dead	1798	Low	0
TCGA-S2-AA1A-01A-12R-A39D-07	live	513	Low	0

## Sheet: multivariateCox
multifactor model variables	coefficient
Intercept	0
Pathologic T stageT3&T4	0.713376
Pathologic N stageN1&N2&N3	0.781799
PLK1High	0.448954
