# Supplementary material for: PLK1 overexpression as a dual-role biomarker and therapeutic vulnerability in pulmonary adenocarcinoma
Source: PeerJ journal article supplement (doi:10.7717/peerj.20618), 2026-01-15
Supplement: additional_files.tar [file Figure 5 related data(input data for volcano).xlsx]

## Sheet: Sheet1
gene_name	log2FoldChange	padj
TSPAN6	0.0557493	0.475074
TNMD	-1.03334	0.000761157
DPM1	0.233531	5.3247e-06
SCYL3	-0.293904	2.00086e-12
C1orf112	0.719308	1.55839e-34
FGR	-0.227774	0.0175643
CFH	-0.256461	0.0139673
FUCA2	0.394649	4.87304e-12
GCLC	1.22942	7.79252e-19
NFYA	0.287511	9.13543e-09
STPG1	-0.0632811	0.307559
NIPAL3	-0.491313	6.00957e-18
LAS1L	0.232988	1.83126e-09
ENPP4	-0.421301	3.58587e-10
SEMA3F	0.455552	1.83762e-07
CFTR	-1.08641	3.15779e-11
ANKIB1	0.346355	3.3936e-11
CYP51A1	0.365847	8.96757e-05
KRIT1	-0.19272	0.000584424
RAD52	0.0853009	0.180773
BAD	-0.0376422	0.62276
LAP3	0.221122	0.000125024
CD99	0.305696	5.00374e-06
CD99
HS3ST1	-0.0399302	0.763633
AOC1	-0.162394	0.481471
WNT16	0.324779	0.108549
HECW1	0.170077	0.203274
MAD1L1	-0.102463	0.352452
LASP1	0.405578	2.43479e-14
SNX11	0.10421	0.0323318
TMEM176A	0.138459	0.25854
M6PR	0.303199	3.52332e-08
KLHL13	0.497826	0.000423346
CYP26B1	0.49943	8.29212e-06
ICA1	0.0733557	0.320483
DBNDD1	0.42622	2.59901e-07
ALS2	0.11581	0.00561332
CASP10	-0.185872	0.00235895
CFLAR	-0.252204	2.83478e-05
TFPI	-0.370953	0.00338752
NDUFAF7	-0.0250664	0.587305
RBM5	-0.432467	7.68696e-18
MTMR7	0.758243	1.59783e-06
SLC7A2	0.0105402	0.962013
ARF5	0.280309	9.29585e-06
SARM1	-0.404989	5.72933e-10
POLDIP2	0.304065	6.34386e-11
PLXND1	-0.104581	0.214506
AK2	-0.174178	0.000869357
CD38	-0.147115	0.253774
FKBP4	0.889159	9.15924e-36
KDM1A	0.426382	4.4749e-24
RBM6	-0.261966	5.29754e-06
CAMKK1	-0.331998	5.42984e-06
RECQL	0.619628	1.11986e-20
VPS50	0.0971964	0.0513639
HSPB6	-0.631115	3.84576e-06
ARHGAP33	0.552632	1.06001e-07
NDUFAB1	0.17071	0.0028285
PDK4	-0.47728	0.000223553
SLC22A16	-0.425804	0.00374719
ZMYND10	-1.04673	6.87043e-11
ABCB5	0.0101559	0.964674
ARX	-0.28587	0.20965
SLC25A13	0.541812	2.58144e-23
ST7	-0.200098	0.000263971
CDC27	0.285028	1.14834e-12
SLC4A1	0.0518588	0.783392
CALCR	0.200931	0.286843
HCCS	0.250062	6.46159e-08
DVL2	0.277899	9.04798e-09
PRSS22	0.390847	0.000465325
UPF1	0.0217261	0.721106
SKAP2	0.32491	1.3955e-06
SLC25A5	0.218235	0.000734858
MCUB	0.263459	0.000719587
HOXA11	2.71454	9.80881e-23
POLR2J	0.328871	1.66017e-06
DHX33	0.336088	1.69029e-13
MEOX1	-0.724055	1.03907e-08
THSD7A	0.253304	0.0536327
LIG3	0.420265	3.50961e-20
RPAP3	0.294513	4.29133e-14
ACSM3	-0.810589	5.6895e-15
REXO5	0.65452	6.37027e-25
CIAPIN1	0.151702	0.00146726
SPPL2B	0.0539851	0.50798
FAM214B	0.0950327	0.108468
COPZ2	-0.0773442	0.444395
PRKAR2B	-0.200817	0.0719363
MSL3	-0.118692	0.00169057
CREBBP	-0.0270306	0.623738
TSPOAP1	-0.650927	4.47426e-10
MPO	0.521771	3.2197e-05
PON1	-0.555498	0.000924742
GCFC2	0.0950443	0.0727102
WDR54	0.179326	0.0254397
CROT	-0.118813	0.0757473
ABCB4	-0.22094	0.0930556
KMT2E	-0.194071	3.73961e-05
RHBDD2	-0.065881	0.305329
SOX8	-0.768339	8.35734e-08
IBTK	0.0178596	0.761321
ZNF195	-0.0879373	0.174365
MYCBP2	-0.317946	2.37094e-06
FBXL3	-0.347249	7.08324e-14
ITGAL	-0.22234	0.0202186
PDK2	-0.26273	3.70606e-05
ITGA3	0.29969	0.00276336
ZFX	-0.306705	3.74819e-09
LAMP2	0.0026799	0.969102
ITGA2B	0.355676	0.0188715
ASB4	-0.595324	0.000257172
GDE1	-0.206251	0.000291957
REX1BD	-0.0691632	0.407432
CRLF1	-0.45773	0.0568707
OSBPL7	-0.208655	0.0127692
TMEM98	-0.447824	7.83381e-07
YBX2	1.4507	9.23145e-17
KRT33A	0.0636995	0.914656
MAP3K14	0.0142446	0.867159
ABCC8	0.17695	0.457954
CACNG3	0.208187	0.532791
TMEM132A	0.858254	9.39381e-20
AP2B1	0.319401	2.47009e-11
TAC1	3.27684	1.16937e-15
ZNF263	-0.0479314	0.205968
CX3CL1	-0.326668	0.0159601
SPATA20	-0.0433451	0.576406
CACNA1G	-0.378858	0.0187451
TNFRSF12A	0.190659	0.0775012
DLX6	1.62936	3.72317e-10
MAP3K9	0.0977976	0.211151
RALA	0.342119	5.63012e-14
BAIAP2L1	0.389105	9.44969e-09
KDM7A	-0.240752	7.99805e-05
ETV1	-0.797648	3.81643e-15
AGK	0.0819373	0.0570217
ALDH3B1	-0.52779	1.90771e-06
TTC22	0.0894004	0.325534
PHTF2	0.166657	0.00708481
CCL26	1.07716	9.38542e-13
FARP2	0.240769	2.49827e-06
USH1C	-0.027662	0.927298
GGCT	0.164899	0.0323085
DBF4	0.864263	1.18494e-41
TBXA2R	0.145186	0.0764532
IFRD1	0.138391	0.139243
LGALS14	1.29483	0.00414895
COX10	0.133318	0.00189517
GTF2IRD1	0.441572	1.09543e-16
PAF1	0.148376	0.00486924
VPS41	-0.0501971	0.314046
ARHGAP44	-0.695337	4.2605e-13
ELAC2	0.112606	0.00985841
SCIN	0.153061	0.359853
ARSD	-0.428661	4.40324e-08
PNPLA4	-0.277115	0.000106988
MYH13	0.28352	0.14302
ADIPOR2	0.41196	3.26256e-14
CDKL3	-0.400931	1.31139e-06
UPP2	-0.731128	1.32223e-06
PRSS21	0.772049	0.000181453
MARK4	0.333972	7.1391e-12
PROM1	0.111722	0.637318
CCDC124	0.250776	0.000297959
CEACAM21	-0.397811	0.000148426
PAFAH1B1	-0.150765	8.43507e-05
NOS2	0.490343	0.000115694
DNAH9	-1.70427	8.73805e-15
KIAA0100	0.157212	0.00143196
SLC13A2	-1.20401	6.23797e-05
GAS7	-0.445269	1.00184e-07
TRAPPC6A	-0.079013	0.383489
MATK	-0.156433	0.155813
CEACAM7	0.470529	0.0195902
CD79B	-0.793551	2.79963e-11
SCN4A	0.313785	0.134456
ST7L	-0.171666	0.000386165
TKTL1	1.28546	2.40781e-08
PAX6	0.659437	0.0129008
RPUSD1	0.357477	1.58231e-07
RHBDF1	-0.119408	0.0900465
LUC7L	-0.292842	3.82173e-06
CACNA2D2	-1.79218	9.95327e-32
BAIAP3	-0.170179	0.181931
TSR3	0.124769	0.0352705
PIGQ	-0.214908	0.00148145
CRAMP1	-0.0809414	0.137112
TEAD3	0.114111	0.0692334
SELE	-0.286573	0.0555183
DNAJC11	0.384171	1.48664e-24
FMO3	-0.516218	2.07578e-06
MYLIP	-0.444766	1.53891e-13
NOX1	-0.0527315	0.643028
E2F2	1.4166	3.4143e-80
PSMB1	0.196708	0.000572504
SYN1	0.0203084	0.890274
JARID2	0.309325	2.1546e-08
CDKL5	-0.453824	3.6632e-10
CAMK1G	-0.237844	0.00473299
CDK11A	-0.199667	0.0099181
NADK	0.0865007	0.104918
TFAP2B	0.881532	0.0050583
TFAP2D	0.12938	0.748541
DLEC1	-1.45008	7.90156e-23
CYTH3	-0.426163	2.49695e-06
ADAM22	0.140808	0.16959
SYPL1	0.0409328	0.481077
CYB561	-0.0384163	0.56776
SPAG9	-0.252119	1.41453e-05
CELSR3	0.681826	3.16106e-09
AASS	-0.497903	6.77208e-07
PLEKHG6	0.805112	2.34735e-16
SS18L2	-0.0511099	0.386179
MPND	-0.0543255	0.404391
MGST1	0.131272	0.208327
CRY1	0.230786	5.93492e-06
PGLYRP1	-0.243159	0.114903
NFIX	-1.09843	4.47108e-36
ST3GAL1	-0.174306	0.0901358
MMP25	0.294783	0.00199313
IL32	0.258183	0.0110753
PKD1	-0.0870208	0.270872
MAPK8IP2	0.784388	8.01416e-09
MED24	0.32727	3.37743e-11
RHOBTB2	-0.978811	3.35316e-21
HEATR5B	-0.0657243	0.169858
SEC62	-0.137941	0.00393403
RPS20	-0.0775178	0.293775
CSDE1	0.0726084	0.102501
UBE3C	0.311456	7.4435e-14
REV3L	-0.531525	3.93351e-12
TENM1	-0.674354	0.00205531
PAX7	-1.32851	0.000444892
MASP2	-0.7361	2.17797e-13
IYD	-0.973344	1.40404e-07
FAM76A	-0.255249	2.38054e-10
TRAF3IP3	-0.473629	3.98337e-07
POMT2	0.176599	0.000744826
VTA1	0.354911	8.75801e-16
MLXIPL	0.0522668	0.759955
BAZ1B	0.283205	1.20511e-10
RANBP9	-0.0846409	0.0836703
ETV7	0.258592	0.00543643
SPRTN	0.119209	0.006062
EEF1AKNMT	0.227476	5.51691e-08
DYRK4	-0.118259	0.0664145
ZNF207	-0.0563772	0.160472
UQCRC1	0.212106	0.000257329
STARD3NL	0.184167	0.00312809
CD9	-0.0184817	0.849195
HHATL	-1.73766	4.15634e-12
NCAPD2	1.14706	7.21265e-91
IFFO1	-0.106895	0.224862
GIPR	-0.888722	6.91447e-16
PHF7	-0.172062	0.000723619
SEMA3G	-0.373088	3.70527e-05
NISCH	-0.291881	8.33907e-09
STAB1	0.144618	0.124609
FUZ	-0.0436058	0.537152
SLC6A13	-0.941734	8.42007e-10
IDS	-0.0173116	0.857605
PRSS3	1.84704	3.90419e-16
ZNF200	0.196408	9.16842e-07
CD4	-0.176406	0.042978
LRRC23	-0.344205	5.48599e-05
BTK	-0.453229	1.52076e-07
HFE	-0.0156348	0.841476
SCMH1	-0.103678	0.0353233
FYN	-0.109508	0.146666
HIVEP2	0.0819535	0.180203
FMO1	0.0528106	0.716461
ELOA	-0.135169	0.00187972
LYPLA2	0.0686851	0.307127
CLCN6	-0.202365	0.000413332
MRC2	-0.101622	0.27615
NME1-NME2
SLC6A7	-0.127955	0.333869
TSPAN9	-0.165353	0.0240638
BTBD7	-0.0578299	0.293379
APBA3	0.1034	0.0517993
MKS1	0.0616294	0.195779
ABHD5	0.053558	0.295328
ANOS1	-0.592513	6.93586e-08
AKAP8L	0.0151054	0.79218
MBTD1	-0.0256861	0.678186
UTP18	0.376541	1.20522e-19
RNF216	0.234901	1.24928e-08
TTC19	-0.37652	4.6317e-15
PTBP1	0.413706	3.41329e-35
DPF1	1.1767	1.24808e-23
SYT7	0.198427	0.176762
LARS2	0.223388	1.48117e-08
PIK3C2A	-0.199919	0.000339531
PLAUR	0.552606	4.84443e-09
ANLN	1.86269	6.78539e-96
WIZ	0.260912	4.07885e-07
RABGAP1	-0.071589	0.103208
DCN	-0.547278	9.16581e-09
QPCTL	0.00280645	0.97311
PPP5C	0.194206	2.55088e-05
CEP68	-0.213002	2.4665e-06
MAP4K3	0.107992	0.0363073
ZBTB32	-0.0618697	0.570422
TYROBP	-0.175864	0.105196
TMEM159	-0.319938	6.20898e-05
GABRA3	1.8564	3.60867e-09
BRCA1	1.31211	2.4817e-83
ERCC1	0.0882531	0.107213
CD22	-0.85161	9.38417e-13
SEMA3B	-0.138348	0.364106
MBTPS2	0.180918	0.000356413
PRICKLE3	0.342908	5.60177e-09
LTF	-0.752822	7.22375e-05
EXTL3	0.153118	0.0160541
NR1H4	0.94336	0.00100358
ELOVL5	0.252773	4.79912e-06
ALOX5	-0.132956	0.195779
KDM5D	-0.274682	0.459577
CALCOCO1	-0.521392	1.90011e-24
UBR7	0.218157	1.55509e-07
MAP4K5	0.0477967	0.385085
EHD3	0.222788	0.00134051
PSMC4	0.47014	1.08027e-17
MAN2B2	-0.116706	0.038546
SLC7A14	-0.61426	0.00952272
CLDN11	0.331994	0.0139382
SLC25A39	0.434219	1.21336e-12
MVP	-0.238469	0.00126208
NUB1	0.132273	0.00132517
PGM3	0.207112	0.000209406
RWDD2A	-0.118515	0.0336636
CLK1	-0.408041	2.94841e-13
POLR3B	0.0957726	0.0422832
ANGEL1	-0.0174835	0.765362
RNF14	-0.117706	0.0132054
DNASE1L1	0.0770228	0.224446
DDX11	0.725022	4.35555e-22
HEBP1	-0.0361252	0.536953
GPRC5A	-0.0932095	0.434549
MAMLD1	0.132219	0.263536
CD6	-0.161541	0.106425
TACC3	1.25576	6.28671e-98
UFL1	-0.128428	0.00194699
POLA2	0.557187	4.17121e-20
ZC3H3	0.335556	1.62411e-08
CAPN1	0.193038	0.000823516
ACP3	-0.156805	0.0862958
MDH1	0.245493	3.82244e-08
SLC30A9	-0.0702606	0.130437
MTMR11	0.353066	0.000264657
COX15	-0.00667323	0.902172
CCDC88C	-0.0137755	0.867437
YAF2	-0.141181	0.0181326
ZMYND11	-0.198796	3.52616e-06
WAS	-0.155741	0.0745386
DPEP1	-0.0499125	0.772516
BID	0.415065	1.54373e-09
MATR3	-1.50042	7.49043e-34
NPC1L1	0.444746	0.0517272
XYLT2	0.0781555	0.15747
RGPD5	-0.397498	0.0746088
STMN4	0.108196	0.684813
NUDCD3	0.135176	0.00404467
ISL1	-0.831427	0.00675563
CHDH	-0.142259	0.141446
IL20RA	-0.113643	0.440095
CLCA1	1.02593	0.00866936
CLCA4	-0.433993	0.0575982
GLT8D1	-0.106624	0.00107512
ATP2C1	0.303505	6.33665e-09
IGF1	-0.311472	0.0118869
SLC38A5	0.0141349	0.91396
RALBP1	0.295291	5.19601e-10
RUFY3	-0.490233	8.86492e-18
CNTN1	0.8309	2.65762e-06
SLC11A1	-0.0816103	0.474228
WWTR1	-0.0523256	0.474057
AGPS	0.298804	1.9961e-11
CXorf56	0.15852	3.61934e-05
ATP1A2	-1.48511	1.00214e-31
TTC27	0.313308	2.16049e-14
ZNF582	-0.223238	0.00411928
VSIG2	-1.35004	1.22214e-16
PHLDB1	-0.085015	0.202689
MARCO	-0.238676	0.150752
CYP24A1	0.830471	9.56025e-05
PRDM11	-0.199193	0.00182277
SYT13	0.938522	0.000658739
SNAI2	0.609868	3.46977e-07
CD74	-0.555239	9.32873e-09
HGF	-0.452056	5.24927e-05
ZRANB1	0.0533865	0.332382
NCDN	-0.0567533	0.3338
ADGRA2	-0.098462	0.276314
ZFP64	0.324987	7.02506e-15
MNAT1	0.126824	0.0159908
SAMD4A	-0.0275748	0.804617
RUNX3	-0.0993939	0.30797
MRE11	0.116196	0.0115435
PLEKHB1	-0.0644799	0.599908
SERPINB1	0.120031	0.162338
CYP3A43	-0.5078	0.00221401
SLC7A9	1.0167	1.14604e-07
SPAST	0.213926	8.10122e-06
NRXN3	-0.50685	0.000137579
OSBPL5	0.05559	0.584068
AQR	0.0242251	0.636669
CPS1	1.07973	0.00023807
C8B	0.0173528	0.950028
FHL1	-1.00958	8.37008e-20
RTF2	0.0969674	0.0186925
GABRA1	0.728515	0.088795
NLRP2	0.428015	0.0294989
SLC45A4	0.243894	0.00841266
RNF10	0.0722921	0.0670849
ZNF839	0.00672238	0.913986
ZDHHC6	0.0290846	0.500607
GRAMD1B	0.864898	3.22902e-08
RNH1	-0.148686	0.00694557
NDUFS1	0.189689	2.70865e-05
RB1CC1	6.29314e-05	0.999315
ERP44	-0.0582117	0.188515
ALAS1	-0.000324128	0.99626
BIRC3	0.506951	2.29576e-05
AKAP11	-0.249331	1.45481e-05
GLRX2	-0.0585777	0.213812
SNAPC1	0.275698	3.7393e-06
DERA	0.45693	4.65336e-12
STRAP	0.658272	8.15083e-31
ABCC2	2.39003	5.88277e-26
DEF6	-0.114636	0.0752814
PLEKHO1	0.145183	0.0632037
GCLM	0.655489	1.03239e-10
UBR2	-0.152821	0.00043505
EHD2	-0.167401	0.065792
DEPDC1	1.70172	1.25373e-69
CCDC28A	-0.440822	1.02931e-15
RRAGD	0.111851	0.267023
HSF2	0.136768	0.00351759
PHF20	0.111269	0.00813504
HSD17B6	-1.57672	6.27224e-29
NR1H3	-0.00200249	0.981484
TYMP	0.27414	0.000498655
NCAPH2	0.241814	1.32346e-05
TOMM34	0.410522	1.79001e-14
SEC63	-0.0373134	0.429889
KPNA6	0.108365	0.00888776
VIM	-0.117716	0.163474
RTEL1-TNFRSF6B	-0.0759714	0.534232
FAS	-0.0909975	0.375981
RNASET2	-0.246878	0.00242115
CD44	-0.0901168	0.334064
KCNG1	1.40242	4.36387e-17
AGPAT4	-0.108492	0.242305
SLAMF7	-0.0984863	0.447476
BTN3A1	-0.123185	0.0658535
MIPEP	-0.0922792	0.109156
PRKCH	-0.152057	0.00517533
INSRR	0.337814	0.051981
IFNGR1	-0.267192	4.76926e-05
B4GALT7	-0.0452266	0.450057
SH2D2A	0.539686	1.4291e-10
VRK2	0.417234	2.8801e-17
TNFRSF1B	-0.133923	0.0814968
VEZT	0.0749719	0.121314
POU2F2	-0.225671	0.0222473
BRD9	0.325085	6.03896e-09
SNX1	-0.321566	1.15115e-20
TBPL1	0.131644	0.0203624
ARNTL2	1.40245	5.24415e-31
BCLAF1	-0.0575475	0.15749
SLC39A9	0.0494611	0.269611
ANK1	0.389946	0.0110494
IBSP	0.0562323	0.821999
TFB1M	-0.0293562	0.624071
RABEP1	-0.0780569	0.0652422
HMGB3	0.419108	0.000613454
NUP160	0.177137	0.000161313
BAK1	0.197628	0.00160785
MUSK	-1.57991	2.6933e-26
IKZF2	-0.401146	9.85933e-07
GRN	-0.015173	0.845117
FAM13B	-0.511495	1.49789e-20
ARHGAP31	-0.583635	4.50054e-13
CENPQ	0.516025	6.0637e-16
SARS1	0.0268396	0.600296
RANBP3	0.00988684	0.817593
ARID4A	-0.375677	2.41386e-15
EIPR1	0.423837	8.80164e-19
PNPLA6	0.0798064	0.203409
IFT88	-0.334502	2.40532e-11
ALG1	-0.123909	0.0220101
ZCCHC8	0.163074	4.77549e-06
ABCF2	0.328332	1.84792e-12
CHPF2	0.170827	0.0019149
LRRC7	-0.268825	0.0114996
FUT8	-0.0305366	0.739228
UBA6	0.298348	1.84303e-07
GAB2	-0.0100734	0.908238
ATP6V0A1	-0.175338	0.000845611
PIAS1	-0.19266	1.14703e-05
SLC4A7	-0.225796	0.00840617
APBA2	0.0529529	0.721775
MAP2K3	0.0384639	0.558617
EFCAB1	-1.32218	7.26057e-12
TMSB10	0.301993	0.000215954
ASTE1	-0.0435919	0.324247
RNF19A	-0.159293	0.0517272
PEX3	0.0180295	0.776239
GABARAPL2	-0.250549	6.45811e-07
MYOC	-1.66166	4.98957e-21
SH3YL1	-0.24667	8.64596e-05
FAM136A	0.478148	8.34141e-28
VCL	0.23313	0.000164629
DEPDC1B	1.60653	2.34445e-69
DAPK2	-1.00284	2.33869e-31
NSMAF	0.0440805	0.369751
ADSS2	0.0725971	0.116393
STAP1	-0.882404	2.45916e-16
TIMP2	0.204985	0.0167525
RFC1	0.177423	5.35508e-05
TBC1D23	0.0498609	0.317797
CUL3	0.0594108	0.162812
MYOM2	-0.667106	2.90471e-10
OTC	-1.39646	3.53868e-11
CYP46A1	-0.436048	2.47508e-05
ZZZ3	0.077944	0.144365
SLC18A1	-0.355642	0.050235
USP2	-0.310461	0.00932198
CASR	-1.99045	1.16169e-15
TUBG2	0.0939215	0.16698
RPL26L1	0.163992	0.0173192
FLT4	-0.061589	0.511923
NSUN2	0.574316	1.64451e-28
FBXO42	-0.0542673	0.097027
MFAP3	0.0254395	0.730677
MRI1	-0.132692	0.0206438
METTL1	0.438171	4.01196e-09
HOXC8	0.811321	2.49351e-05
AGA	-0.428692	6.05649e-08
PI4K2B	-0.0434748	0.498962
BOD1L1	-0.0232832	0.730728
MAT2B	-0.247324	9.28709e-07
TLL1	-0.131962	0.271596
EDC4	0.196217	8.54132e-05
TRIO	0.448429	1.52649e-10
VCAN	0.236357	0.0618846
CLEC16A	-0.172194	0.000429668
MSR1	-0.0855035	0.496025
CDH1	0.112587	0.130071
MTREX	0.00894087	0.875624
DNAH5	-0.547817	3.50857e-06
ZFYVE16	-0.250481	3.74684e-05
RIPOR1	0.125726	0.0774096
C6	-1.69559	4.64453e-19
RAI14	0.0688303	0.424402
SOX30	0.741411	5.74082e-06
PNKP	0.205599	0.000112474
BEST2	0.493005	0.0211974
PHLPP2	0.125075	0.0506114
SPDL1	0.771424	1.73489e-43
STAU2	-0.0092887	0.903103
SLC66A1	0.116484	0.0503686
CTNS	-0.153491	0.00172644
RTN4R	0.205176	0.0410088
PHF23	0.0218588	0.690827
CDH10	-0.0902436	0.705238
INPP4A	-0.140307	0.00176214
RAB27B	-0.0359377	0.808156
PSMA4	0.222542	4.473e-05
MYO16	0.40867	0.0116141
LSG1	0.50538	1.03546e-26
PARP3	-0.22774	0.000102762
TNC	0.18276	0.247805
THAP3	-0.09049	0.127988
RIPOR3	0.313204	0.00147846
TDP1	0.615316	3.50572e-21
AIFM2	0.238094	0.00240844
C2orf83	0.614473	0.0228329
SPATA7	-0.199891	0.0001004
MED17	-0.439617	4.89707e-13
RETSAT	-0.179379	0.00350012
CAPG	0.112917	0.186984
AP2S1	0.377578	2.17677e-11
USH2A	-0.830233	2.58154e-09
ZPBP	-1.29599	1.66074e-08
TG	0.243867	0.0702193
ADAM28	-0.482775	2.06492e-05
BARX2	0.117311	0.51191
DCUN1D1	0.260957	1.05637e-06
JADE2	-0.193168	0.00261188
ZIC2	1.26695	6.75842e-08
LCP2	-0.0244807	0.800386
TRIT1	0.151634	0.00950933
ADRB1	-0.861336	2.081e-08
GUCA2B	1.05022	0.00916392
CUL7	0.156443	0.00716478
CTNNA1	-0.0239372	0.664728
PHKA2	-0.0362637	0.521572
CNTLN	0.224942	0.0146516
EPHA3	-0.96508	1.3363e-11
HSPA5	0.0550237	0.361809
DSG2	0.682956	4.52111e-15
GEMIN8	-0.299306	1.82751e-10
OFD1	-0.301289	1.79734e-09
GPM6B	-0.631656	1.55327e-10
MAGEC2	2.91542	2.74055e-11
PREX2	-1.03272	1.14404e-21
WDR37	-0.196838	9.24945e-06
YTHDC2	-0.284298	2.91659e-09
CTPS2	0.0310282	0.597396
ATP6V1H	0.0278035	0.605614
POLR2B	0.227329	1.28566e-07
FAM214A	-0.469747	3.8873e-15
ARAP2	-0.222569	0.00635845
TPR	0.094554	0.072967
CP	0.477565	0.00160091
KATNIP	-0.0103546	0.86492
DTNBP1	-0.0524835	0.227153
XK	-0.197721	0.185493
ANO2	-0.787935	4.14572e-13
C12orf4	0.221549	4.95764e-06
SCML1	-0.0823538	0.375541
WWC3	-0.304466	2.39468e-06
ARHGAP6	-0.741248	1.02678e-19
FAM184B	-0.437098	9.14643e-05
MAP4	0.145399	0.00164138
GOPC	0.0645079	0.124113
ROS1	-1.04401	3.22738e-13
USP28	0.157519	0.00709576
HDAC9	-0.0123332	0.936086
TSPAN17	0.100154	0.0793731
NOP16	0.25529	7.37168e-05
CC2D2A	-0.565503	5.32774e-15
RRM2B	-0.566594	6.5007e-21
ZNF800	-0.1387	0.00723795
TNFRSF17	-0.860229	1.93124e-10
SNX29	-0.32003	8.57664e-10
LMO3	-0.869414	9.6928e-11
MRPS10	0.38454	4.04821e-13
GUCA1A	0.465988	0.0185251
RSF1	0.0070471	0.91309
VPS13D	-0.451351	1.19759e-13
CELF2	-0.799105	1.0804e-24
FAM120A	0.0408675	0.38615
R3HDM1	0.48749	8.88568e-30
COL9A2	-0.0315945	0.849018
KITLG	-0.333849	0.000266384
ERCC8	-0.17276	0.00106705
ADAMTS6	0.303207	0.00994614
H6PD	-0.022807	0.753973
VAMP3	-0.0866469	0.0354866
PER3	-0.564171	1.56351e-09
UTS2	0.0989394	0.626394
TNFRSF9	0.339873	0.00583603
EPN3	0.579082	1.23697e-08
LTBP1	0.0203573	0.850657
RCN1	0.106059	0.152368
ELN	-1.04903	1.11044e-19
RFC2	0.667863	2.66477e-34
ARID1B	-0.143475	0.0115528
CLPTM1L	-0.0803608	0.302174
NEDD4L	-0.669234	1.50027e-17
FOXP3	0.0314798	0.771049
PPP1R3F	0.122587	0.169536
HEXB	-0.141266	0.0124491
PTCD2	-0.094014	0.0557861
NEXMIF	-1.22308	8.30714e-14
JKAMP	-0.017741	0.707079
DKK3	-0.257438	0.00789495
ARHGEF5	0.210133	0.000388838
NFE2L3	0.0126747	0.91376
MCUR1	-0.0137583	0.804384
LIMA1	0.0219798	0.776361
LETMD1	-0.279732	2.56592e-08
SLC4A8	-0.107299	0.467363
LAMC3	-0.10972	0.378781
PTGER3	-0.811755	1.30004e-07
TNIP3	0.392037	0.0120503
MAPK9	-0.149372	0.00417442
COL23A1	-0.0166749	0.911614
BCAR1	0.248076	0.000268999
FAM160A2	-0.20925	3.61263e-06
HERPUD1	-0.490333	1.11814e-19
HOMER3	0.424504	1.5968e-08
RAD51	1.36924	4.81562e-79
POLQ	1.37233	3.02686e-46
PIK3CB	0.103931	0.0889983
CYBA	-0.02066	0.847311
THOC3	0.38075	5.92817e-09
HEBP2	0.181154	0.00320989
MPHOSPH9	0.370044	7.46137e-08
PLEKHA5	0.116185	0.134162
PRSS8	-0.06522	0.524326
SIKE1	0.0816995	0.116668
RRP12	0.410884	6.72552e-13
FNIP2	-0.597127	1.35873e-12
MSMO1	0.189279	0.0111239
TTC17	-0.233806	1.40517e-08
ALX4	0.286537	0.192244
FSTL4	-0.382353	0.0641216
FOXN3	-0.13196	0.0489757
METTL24	-0.258761	0.0290862
AKR7A2	-0.0283847	0.645127
MRTO4	0.375185	5.13008e-11
NNAT	-0.140609	0.252102
USE1	-0.0965196	0.123658
MCF2L2	0.639881	1.28912e-10
NRIP2	-0.600851	2.28183e-25
LAMA3	0.655666	2.7948e-05
AP5M1	-0.0354216	0.43912
ANAPC4	-0.152865	0.000452045
KCNQ1	-0.780666	2.31218e-11
TRAPPC3	-0.0312234	0.55113
THRAP3	0.0950633	0.00386306
PHPT1	-0.254548	0.00139349
ENTPD2	0.4216	0.00536089
LY75	-0.0140416	0.893218
ARID4B	-0.160583	0.000375331
OPN3	0.56229	9.16283e-06
SDCCAG8	-0.313282	6.98308e-12
PTPRN	1.62344	2.27563e-16
HHAT	-0.388342	2.66583e-07
KIF1B	0.106059	0.0608604
FOXC1	0.160911	0.203216
TBC1D22A	-0.0878029	0.0555464
SYNE2	-0.258863	0.00123161
PLEKHH1	0.901505	6.42399e-12
ATP9A	-0.144629	0.0474503
SPO11	0.0139672
CBLN4	-1.02488	8.39074e-12
CHRDL2	-0.476924	0.00269192
FAM168A	0.231534	4.77365e-06
RELT	0.386248	1.16456e-08
GALC	-0.155773	0.0102021
NOP58	0.377588	6.50904e-22
SZRD1	0.17802	3.67461e-05
KCNH2	1.00172	1.26556e-09
CUL1	0.138699	3.87236e-05
FAM114A2	-0.241433	7.92009e-09
CYFIP2	-0.706565	2.19916e-18
TAB2	0.0976548	0.0333985
GINM1	-0.0273018	0.615896
EIF2AK2	0.234311	9.69891e-06
USP36	0.178924	1.77932e-05
KMT2C	-0.242792	0.00038699
MCOLN3	0.373894	0.0119363
CCDC85A	-0.432952	0.000525322
PUM2	-0.0430114	0.229581
MRPL43	-0.0842006	0.193201
ITIH4	-0.227587	0.106815
ITIH1	-0.228386	0.147754
HPF1	0.0335278	0.557481
ZFR	0.202262	2.76579e-08
ZNF280C	0.0640565	0.300492
NPFFR2	1.84271	2.20598e-11
PHF21B	0.424375	0.0323997
TRAF1	-0.0360659	0.692505
RC3H2	0.076871	0.192603
IL17RB	0.11113	0.311986
TRAF3IP2	-0.0890006	0.100498
GYG2	-0.0771997	0.517735
DCBLD2	0.843433	2.01954e-12
SERPINB3	0.676815	0.0308433
SOAT1	0.042635	0.468147
PKP2	1.23879	2.40472e-17
MSH4	0.164701	0.280437
F7	1.19341	1.4471e-08
GDI2	0.145434	0.00268952
PRDM1	-0.181898	0.0344124
ATG5	0.119505	0.018777
TMCC3	0.360555	2.15926e-05
PITHD1	-0.0739881	0.0739537
MTA3	0.313624	8.52866e-12
USP13	-0.0528819	0.516101
ATP11B	0.148557	0.0255787
LAMC2	1.35912	3.67805e-25
CDK14	-0.155279	0.093996
SEC61A1	0.256219	2.40939e-09
PPP1R12A	0.177715	0.000504619
RASGRF1	-1.45401	3.34443e-20
CAMK2B	1.20835	1.23674e-09
CROCC	-0.340551	8.43738e-06
POLR3E	0.0754717	0.0948942
ATP2B4	-0.181484	0.0206192
ZC3H11A	-1.31507	2.99628e-23
RIOK2	-0.16177	5.00168e-05
YIPF1	0.0207542	0.692549
NDC1	0.742921	1.16678e-41
DGKG	0.557243	4.21197e-08
FLYWCH1	-0.143813	0.0123198
UNKL	0.0859514	0.204027
TBXAS1	-0.0432042	0.641422
PARP12	0.344927	1.84358e-10
ALDH18A1	0.205895	0.000147779
TARBP1	-0.256717	0.0001306
GATB	0.154722	0.00325925
MXD1	0.322888	0.000175291
CDK17	-0.0415817	0.444777
DNAJC25	0.0160858	0.759955
SLC2A3	0.511221	2.90493e-06
PSD	-0.146872	0.136195
CTDP1	0.137298	0.00440262
YBX3	0.26108	9.26783e-06
STYK1	0.581015	3.48552e-08
WNK1	-0.0821041	0.26525
CCAR1	0.17175	2.0376e-06
OGFR	0.107977	0.0779496
GNA15	0.225325	0.00564293
CREB3L3	0.702042	0.000157093
PIGV	-0.170599	0.000814683
PTPRU	-0.443318	1.13546e-05
SNRNP40	0.274073	3.43834e-10
RIMBP2	0.337734	0.179745
COL11A1	0.667272	0.000914345
QSER1	0.0937402	0.13857
MPC1	-0.358859	1.13352e-08
ACAA1	-0.345677	5.47028e-11
BCAT1	-0.278017	0.0411885
HDAC7	-0.0211248	0.724701
LZTS1	0.274077	0.00182423
PRDM6	-0.832905	2.08057e-19
WNT8A	-0.390895	0.268204
SPAG4	0.273585	0.0055646
NCKAP1	0.217936	3.60091e-06
MRPS35	0.681495	1.00678e-25
GUCY1B1	-0.235722	0.00138392
SFSWAP	0.151842	0.000444708
TNK2	0.021261	0.788366
MON2	-0.226612	0.000112326
CDH3	0.872848	7.65648e-11
ARSF	-0.45508	0.00616849
GPBP1	-0.111824	0.00169349
DGAT2	0.310603	0.00230591
ZNF112	-0.0789241	0.210942
CS	0.366429	4.37981e-17
LTK	0.239267	0.141303
MRPS24	0.268184	0.0111702
ELMO2	-0.0416548	0.33751
WAPL	0.0945678	0.0282652
VMP1	-0.164498	0.0308534
APPBP2	-0.0737545	0.0892553
POLD1	0.65191	2.98844e-32
SEZ6	-0.460654	0.0151047
EIF4B	-0.0690733	0.194009
SLC6A16	-0.180072	0.0817578
BICRA	0.141183	0.037546
SPHK2	0.11011	0.0876884
RPL18	-0.0303668	0.723283
CA11	0.0627869	0.600296
ISOC2	0.103925	0.150568
U2AF2	0.397382	2.00913e-19
EPN1	0.258796	3.71156e-06
MED29	-0.0500901	0.349595
AHRR	0.334704	0.0659802
GSC2	0.751895	0.0170732
ZNF275	-0.137865	0.014347
MTMR1	0.0232248	0.62394
GPC1	0.401378	6.0394e-05
ADCK1	-0.0815027	0.174444
HAGH	-0.321008	1.66074e-08
RNF4	0.261089	1.92527e-15
CASP8	0.0427325	0.41719
LIMCH1	-0.377003	1.39746e-05
INTS13	0.680074	1.47449e-31
TM7SF3	0.109717	0.167743
DLX3	-0.863305	3.03725e-08
SPA17	-0.5418	1.18086e-10
TSPAN32	-0.496884	4.03055e-06
CCN5	-0.196943	0.102501
DMRT3	0.367021	0.150702
ST3GAL6	-0.700019	1.8494e-17
ATP2C2	-0.191172	0.113401
NGFR	-0.429408	0.00220325
CDON	0.0230738	0.868358
TAF2	0.332505	6.54223e-11
HIPK2	0.121528	0.163433
TNPO3	0.416892	5.78074e-25
BORCS8-MEF2B	-0.656923	0.000121135
RFXANK	0.0341719	0.625989
TMEM161A	0.0738716	0.286558
LPAR2	0.137518	0.0291018
CTSA	0.107463	0.108381
SUGP2	0.00106887	0.98787
SLC12A2	0.147401	0.191454
SNX24	-0.109487	0.0336091
EYA2	0.977889	3.19929e-08
CNN2	0.0452945	0.509943
ABCA7	-0.0392012	0.68506
SNCAIP	-0.343712	0.00376127
DDX20	0.1174	0.00241564
BTBD1	0.0282157	0.493218
FAR2	0.267881	0.0102889
BCAS1	-0.725885	0.000126796
POU1F1	-0.845156	2.61355e-10
CHI3L2	-0.910412	1.26459e-10
SBNO2	0.282862	4.66563e-05
PMS1	0.103407	0.0251662
HMG20B	0.249438	5.13223e-06
CALCRL	-0.659814	6.11931e-15
TAF11	0.226221	6.47566e-07
ANKS1A	0.0948449	0.0805949
AP3D1	0.265543	5.38011e-09
ZNF76	-0.104835	0.0483336
SLC9A3R2	-0.206187	0.0175926
NTHL1	0.00279507	0.977708
UHRF1BP1	0.176241	0.00145466
GNAI3	0.281177	6.23385e-12
IPO5	0.30733	2.98013e-09
OAT	-0.0853838	0.377202
WDR3	0.353303	1.11531e-11
PKN2	0.164977	0.00198824
WDR18	0.433477	3.22492e-11
TRAM2	0.163354	0.00632859
NTN1	0.223375	0.110021
GLP2R	0.0946809	0.668859
MCM10	1.78077	2.88147e-85
DGKA	-0.0171726	0.845212
ERBB3	-0.18618	0.0274722
ROPN1	0.120792	0.701198
ANKRD44	-0.874484	3.10771e-28
KARS1	0.245715	4.75245e-08
ADAT1	0.0651538	0.186125
PDIA5	0.109102	0.0923938
TBC1D22B	0.0585799	0.144854
NDUFB4	0.21735	0.000388115
SPEN	-0.000230839	0.997455
MYLK	-0.25817	0.00449717
ZC3H15	0.355869	1.86323e-18
MAP2K4	-0.0328312	0.468217
PACC1	0.532032	2.95923e-19
SNAP91	0.877199	6.3776e-05
SLK	-0.00716916	0.920844
CYB5R4	-0.0180488	0.790965
COL17A1	0.0977774	0.680429
GSTO2	0.0475921	0.722177
SEC61A2	0.291063	8.583e-06
PRKCQ	-0.364673	0.000323198
TLE2	-0.227499	0.00757947
ASB1	0.134209	0.0016368
FAM107B	-0.231545	0.00169203
ME1	0.466508	1.41077e-05
TBC1D1	0.456819	7.43605e-12
CDK13	-0.0818886	0.0924089
MTHFD2	0.943956	1.24328e-37
SLC9A7	0.362947	2.4998e-06
FOXJ2	0.0516825	0.311298
YBX1	0.41791	1.95672e-16
PDE4A	-0.166042	0.0141242
PPP2R5A	-0.49531	2.52675e-19
CTNNA2	-0.00550757	0.985194
ELAVL1	0.255307	1.35982e-20
TIE1	-0.197059	0.0200153
DIP2B	0.365146	9.13959e-12
SMARCD1	0.387053	9.0273e-19
KDM4A	0.0062	0.895387
NFYC	-0.0486603	0.299445
ZMYND12	-0.723917	2.54907e-15
SLC9A3	-0.0284717	0.86424
NGEF	0.987788	4.9518e-13
ASPM	1.39001	9.37429e-45
CD84	-0.208192	0.0497657
ELOVL1	-0.0350928	0.553695
SPI1	-0.0848762	0.418874
POLR1H	0.00478259	0.945932
MPPED2	-0.126267	0.345559
CLDN18	-1.57977	5.99591e-12
ZBTB11	-0.0142119	0.757348
ATXN3	-0.158859	0.00133268
GOLGA5	0.204294	1.29909e-06
FGFR2	-0.578023	8.75046e-07
LRRC40	0.225602	1.35425e-05
ISOC1	-0.0310944	0.597689
EML1	-0.279971	0.00145699
TRMT11	0.0400789	0.489266
THUMPD1	-0.22989	6.01794e-10
MSANTD3	0.40151	2.27195e-14
KIF26A	0.160121	0.270055
ATG2B	-0.244606	7.45097e-06
ARFGEF1	-0.0226263	0.751658
ACSM2B	-1.21498	4.42679e-07
ZFAT	0.0535283	0.514164
MTFR1	0.344466	2.47296e-06
STAG3	0.448017	0.000449316
FECH	0.187257	0.00665865
MYO9A	-0.549627	1.47053e-16
DDX3Y	-0.0176675	0.96467
PFKP	0.900299	1.30035e-21
IDI1	0.0653243	0.408408
SP100	-0.0517333	0.326517
KLF6	0.00121721	0.989272
PLPP1	-0.185616	0.0226744
NEO1	-0.125162	0.178283
TRAM1	-0.339867	2.84102e-06
PHKA1	0.379464	4.40921e-09
TNFRSF1A	0.169063	0.00692522
CACNB1	-0.697396	1.41616e-12
EVI5	-0.328425	6.95992e-09
STOML1	-0.0525918	0.479684
PKM	0.442512	5.65123e-13
DHX29	-0.175421	0.000500928
DNTTIP2	0.321674	1.86068e-12
METTL22	0.109202	0.0174117
TP53BP1	0.0909516	0.131826
TRO	0.432765	6.53256e-05
RRP15	0.133983	0.00626003
RHOA	-0.0328679	0.473589
DHX8	0.234239	1.88987e-11
PRKCZ	-0.420016	1.72289e-06
ZFY	-0.17687	0.669809
IARS2	0.167604	0.000732454
SYT1	1.10597	1.10782e-11
NAV3	0.191295	0.147513
IDH3G	0.102994	0.0714101
ROGDI	-0.412144	4.63115e-11
PDZD4	0.0995029	0.51485
ATP2B3	-0.182245	0.396978
ROCK1	0.0167937	0.793029
CBFB	0.00237697	0.961169
PDK3	-0.16422	0.0268872
HYAL2	-0.0384901	0.565421
HDAC4	0.136281	0.0283692
RASSF1	-0.0107026	0.845972
FGFR3	-0.548434	0.000396159
IFI35	0.416106	3.79831e-07
HEATR6	0.196188	3.90276e-06
COASY	0.354266	3.94879e-13
PLEKHH3	0.0742785	0.295154
MEF2A	-0.246548	9.95287e-09
OTUD5	0.0446514	0.364829
TFE3	0.162417	0.00064244
TBC1D25	0.0547827	0.281672
ACSL4	0.094136	0.295625
INPP5A	-0.116931	0.0168783
GPKOW	0.319777	2.14093e-10
GRIPAP1	0.176871	0.00121516
FTSJ1	0.367244	6.29995e-15
PRR11	1.71712	6.40392e-119
REEP1	0.128182	0.438174
ATP11A	-0.56315	4.01619e-09
POLR1A	0.370352	3.36983e-15
LAPTM4A	-0.137165	0.00521552
TTC7A	0.150184	0.00493209
IP6K2	-0.146166	0.00056335
STON1-GTF2A1L	-0.27161	0.198634
SRBD1	0.0242237	0.595214
KIF2A	0.160406	0.00376853
RASGRP2	-0.704738	5.62036e-13
PSME4	0.353003	4.3549e-16
IFT80	-0.388887	4.88286e-09
SIRT2	-0.0964726	0.0957231
ERLEC1	-0.177674	0.00102924
PPP2R5B	0.11049	0.059865
PYGM	-0.625552	6.52444e-10
PAGE1	3.43153	3.05041e-13
PITX1	1.02699	1.12517e-09
TRPC7	-0.810772	0.0127956
MAST4	-0.591118	8.03216e-15
ADGRF5	-1.21604	1.00518e-26
SDK2	-0.438973	0.00294737
ADAM7	-1.26239	0.00271646
NUP133	0.0796447	0.0624962
NUCKS1	0.110811	0.0288112
VPS35	0.0529913	0.230276
DNAJA2	0.00794535	0.875154
BCL3	0.259136	0.00202909
KCNAB2	-0.101967	0.209831
ABCC9	-0.858267	4.19389e-16
GAL	2.38256	4.85053e-30
CLEC2D	-0.49938	9.65705e-09
FUNDC1	0.0989401	0.0987131
MAOB	-0.544374	1.35128e-06
RORA	-0.882229	3.10041e-23
DRD4	0.393769	0.0017756
TGFBR3	-0.631846	3.00328e-09
PLA2G10	-1.67052	1.6916e-24
HES2	1.24638	3.28354e-17
ATP1B3	0.45172	1.37331e-13
NEDD4	0.308202	5.71151e-05
PIGB	-0.262563	5.7282e-07
MAPK6	0.523619	1.92294e-17
GNB5	0.000491564	0.993518
RAB27A	-0.532483	1.18689e-15
HDHD5	0.242701	8.25025e-06
UFD1	0.297466	2.99331e-10
LRP6	-0.240674	0.000367
GUCY2C	-0.171338	0.28696
SCT	0.111736	0.408256
PHRF1	0.158868	0.00191773
ELP1	0.00999096	0.844506
NUCB2	-0.29039	6.82438e-06
PFN2	1.01722	1.39965e-20
PTPN3	-0.177418	0.00893299
SPTB	0.108842	0.59721
DAPP1	-0.0850576	0.39541
FGF10	-0.850899	9.75497e-08
SLC44A1	0.190902	0.00150593
TMEM260	-0.0711622	0.277043
SMG6	-0.155058	0.00560141
EXOC5	0.188389	0.0002096
CLTCL1	0.49683	6.28542e-10
FGF22	-0.376355	0.0026276
FSTL3	0.272362	0.0133647
DGCR2	-0.0165383	0.803183
RNF126	0.332586	5.65272e-09
MNT	0.0748595	0.114372
ZXDC	-0.106521	0.0184835
JMJD6	0.418887	1.09643e-21
POLB	0.213462	0.00776576
ST6GALNAC1	-0.332288	0.0212017
WIPI1	0.0990091	0.074674
FRMPD1	0.699977	5.78609e-05
GBA2	0.0328489	0.581868
NDST1	-0.0338143	0.610862
ASNS	-0.000277852	0.998439
AP3M2	0.227613	8.32029e-05
CNGB1	-0.583537	0.000462592
ST6GALNAC2	-0.0343707	0.812734
CHAT	0.0555848	0.889026
PABPC1	0.251008	0.000178495
TESK2	-0.0814517	0.186641
CFAP20	0.133593	0.00340306
CSNK2A2	0.138828	0.00122532
PTPN21	-0.350069	9.58184e-07
EIF2B3	0.135587	0.00279023
CAMK2A	-0.378939	0.00035404
TCOF1	0.55932	7.68982e-28
CDC42	-0.113624	0.0230353
OSBPL3	0.132616	0.0877099
EPHA8	0.710373	0.00137813
SLC12A3	-0.0742591	0.590197
RAD18	0.332401	1.14222e-13
ATP2B1	0.522348	7.1164e-12
TRPM5	-0.318883	0.142017
NCK2	0.158509	0.001849
MAP4K4	0.587686	8.21044e-19
MGAT4A	0.0426885	0.601327
RPL31	-0.131559	0.0833725
WDR1	0.276797	2.25449e-11
SNX13	-0.37912	3.15562e-09
MS4A12	-0.435419	0.397033
ARHGAP10	0.21989	0.00419423
RPS6KA2	-0.49775	1.19192e-10
ING3	-0.0909121	0.0499479
VASH1	-0.11575	0.120349
LMCD1	-0.223397	0.00116912
BUD23	0.17403	0.00109209
SEL1L	-0.0907858	0.131662
TRIP13	1.66819	1.43375e-76
ATP6AP1	0.0346963	0.52539
TCF3	0.464807	2.02921e-17
TRIB2	0.17128	0.0526381
DAZAP1	0.277961	1.18659e-14
MBD3	0.314839	2.29181e-08
PRLH	-0.949855	0.000649914
HLTF	0.649787	4.83618e-17
FAM50A	0.204075	0.00253127
FAM3A	0.00803044	0.918525
CPSF1	0.277839	2.61086e-05
MYO3B	0.720357	7.86902e-05
CYBRD1	-1.04761	3.58233e-33
CDH19	0.352912	0.0783661
PDCD2	0.111407	0.0144839
SLC6A15	2.87367	5.48803e-23
RDH11	0.252705	2.08437e-06
PRKACA	0.0196415	0.705226
ADGRL1	0.0110461	0.908694
SPP2	-0.695563	0.00366092
ACTN1	0.569667	1.15709e-17
ZFYVE26	0.015025	0.794841
RPS6KA6	0.212143	0.13948
EPN2	0.124545	0.0531927
PTPN18	-0.13995	0.00326806
LIMS2	-0.478819	3.033e-08
ASIC4	0.0440774	0.79349
SPEG	0.0487028	0.753139
LNX1	-0.0788054	0.359479
ALDH3A2	-0.721981	5.72111e-15
TFRC	0.822316	1.54472e-20
SREBF1	0.0925746	0.261072
TRPC5	-2.11358	1.07025e-13
AFF4	-0.184484	0.00131469
UBE2D1	0.265654	7.32235e-08
MPP5	-0.0862222	0.107585
RHOBTB1	-0.156684	0.0331913
SMC1A	0.481558	3.56856e-21
HSD17B10	0.324536	2.74473e-08
MARK2	0.280965	5.33297e-11
HMMR	1.56844	7.31281e-80
CHFR	0.325546	3.86207e-14
TRHDE	0.193381	0.376987
P4HA2	0.262566	0.000108059
FCGR2B	-0.105538	0.346233
NFATC3	-0.343149	1.02842e-07
TRNT1	-0.0957353	0.0534575
ACADVL	-0.177072	0.00573634
STK10	0.0407024	0.578458
FBXW11	-0.178897	0.000174782
ACAP1	-0.296062	0.00106925
CRMP1	0.330823	0.000551741
EVC	-0.111449	0.132059
DERL2	-0.112383	0.016346
SIDT1	-0.23296	0.0271485
NDE1	0.438783	3.16995e-14
IRAG1	-0.37045	1.18205e-05
TMEM38A	0.0490258	0.625358
AP1M1	0.0579943	0.231662
PVR	0.569591	2.19385e-20
XRCC1	0.131877	0.0158742
SCARB1	0.705889	5.77188e-16
CYP2W1	0.0776087	0.751214
MCM2	1.56927	8.42156e-102
MOV10L1	0.203397	0.174906
PANX2	0.428396	0.00131606
SELENOO	-0.0854139	0.243879
TP63	-0.267117	0.172897
ALPK1	-0.231023	4.28925e-05
LLGL2	-0.0116825	0.897712
PDE8A	-0.261311	4.14814e-06
CLCN4	0.234476	0.0140268
NLE1	0.435533	2.58528e-17
SDHA	0.124324	0.0750954
SMARCE1	-0.401879	8.36003e-09
FNDC8	0.367627	0.00482214
GSDMB	-0.0398714	0.731327
KDM5A	0.116605	0.0347627
ADAM11	0.64999	2.5572e-08
PPP2R3A	-0.185988	0.0285999
FERMT2	0.0385877	0.591172
ABCB11	-0.0402468	0.847248
DHRS9	-0.0674622	0.722751
CD5L	-0.480371	0.0108979
PTGS2	0.58036	0.000554587
IGF2BP2	1.05723	5.00258e-19
MAP3K13	0.0466725	0.435784
ST6GAL1	-0.320189	6.54238e-05
TBX21	0.538687	1.5837e-05
FRY	-0.630942	6.90019e-16
PICALM	0.147059	0.000506555
NSF	0.203956	5.83494e-06
GLI2	0.0133695	0.908232
CLASP1	0.0937576	0.0372252
MRPS34	0.147463	0.0214549
NOTCH3	0.421795	1.68762e-07
CLNS1A	0.198948	1.30632e-05
PPP2R2C	1.3046	3.94222e-09
TEAD2	0.0155055	0.869947
EED	0.282031	1.3785e-10
CDHR2	0.309821	0.120631
SNCB	0.670296	6.49343e-05
TSG101	0.047792	0.326192
NCBP3	-0.0254215	0.678263
ATP2A3	0.280369	0.0190723
CA12	0.117831	0.573166
MGLL	-0.534046	9.54515e-10
NTN4	-0.426882	2.11222e-06
BCS1L	0.160625	0.000388605
NUAK1	0.143561	0.120881
DPP8	-0.152027	0.00056178
SLC24A1	-0.113589	0.0511283
ZNF532	0.142543	0.0220768
SCARF1	-0.572092	2.49419e-11
LMAN1	0.204161	0.000212594
HACD3	0.0525418	0.423699
IPCEF1	-0.345603	0.0139458
ZZEF1	-0.190835	0.000462069
NOX3	0.161234
ENO1	0.456492	2.9641e-13
SLC12A1	-0.270861	0.204394
MYDGF	0.0966836	0.183291
ANO8	0.0122478	0.896921
TUBE1	-0.168379	0.00218423
ARHGEF10L	0.0093617	0.905903
TXK	-0.450856	8.9669e-06
WSCD2	-0.476416	0.000584763
KCNQ2	0.320693	0.272816
TACR2	-0.0287972	0.826988
ACTR6	0.263419	7.71246e-08
TIPIN	0.568703	1.00268e-28
SRI	-0.0477342	0.531102
EIF4G3	0.115182	0.0140583
NUP37	0.565149	4.31712e-26
SEMA3A	0.952033	1.20199e-10
GTSE1	1.71435	4.1575e-119
SEMA3C	0.190261	0.0888053
TTC38	-0.162566	0.00484984
ACAT1	-0.392735	5.01879e-09
GRAMD4	0.015698	0.867259
CELSR1	-0.102234	0.200797
WNT8B	-0.0312635	0.843536
ZNF638	-0.133601	0.00424459
SLC25A40	0.211471	2.01065e-05
TIMM21	0.175863	0.000173721
ADD2	0.954392	1.54585e-10
FGF4	1.78794	2.20467e-05
RASAL2	0.211206	0.00396724
VPS9D1	0.0877523	0.238712
ZNF37A	-0.179127	0.00673284
MARK3	-0.0801729	0.096869
SLC25A3	0.22231	8.8493e-07
FNDC3B	0.238647	0.000225563
FOSL2	0.250846	0.000550224
CACNG5	0.684247	0.000733979
CACNG4	0.949693	3.06855e-07
FRYL	-0.126367	0.0639286
TMEM131	0.0236126	0.642173
FSCN1	1.24047	2.04222e-29
ACTB	0.271496	5.39619e-08
MOCOS	0.643861	5.12298e-14
PLD1	0.321753	3.13538e-05
ATP12A	0.340475	0.144411
WDR62	1.30142	9.15345e-46
DLG1	0.053695	0.335698
RAB7A	0.260423	1.93547e-10
BCAP29	-0.166011	0.050235
SEC31B	-0.524105	2.13228e-07
SART3	0.316044	1.92042e-22
ARHGAP15	-0.716429	9.02346e-19
TUBA3D	-0.252384	0.0120682
PAX2	1.08124	0.000109954
EXOSC7	-0.0518386	0.29902
KIFAP3	-0.0535134	0.278905
MKRN2	0.0112005	0.764467
MCM6	1.05128	7.92603e-79
REXO2	-0.0539601	0.2905
RBM7	-0.047604	0.355161
RBMS2	-0.248842	1.07867e-05
BAZ2A	0.331499	6.531e-11
PTPN23	0.114847	0.0191369
MLH1	-0.0358649	0.338115
UNG	0.737488	4.23605e-47
FMO4	-0.566131	1.95082e-14
KLHL20	-0.20687	2.55957e-07
RGS11	-0.298421	0.0269876
SLC46A1	-0.160086	0.0115895
PLXNA2	-0.658611	1.78515e-12
SPAG5	1.56689	3.67229e-103
ANKRD13A	-0.0582989	0.285443
TPD52	0.368362	1.26026e-05
ACACB	-0.350415	7.95314e-06
TRAF4	0.315356	1.29572e-07
PAG1	-0.333503	0.00045385
GPATCH1	0.242648	5.05955e-07
ICAM3	-0.469455	1.36428e-06
NT5C2	-0.00849363	0.902691
MCAM	0.453237	5.57207e-08
GPC4	-0.533077	3.97234e-08
MBNL3	-0.416469	8.67411e-07
CAMSAP3	-0.000737835	0.993959
RAP1GAP	-1.08329	1.0572e-18
XAB2	0.0565497	0.30777
ARHGEF1	-0.19726	0.00248211
STXBP2	-0.015936	0.82378
MAP2K7	0.0352052	0.486135
NMRK2	0.00102861	0.997405
DGKD	-0.139244	0.0731699
CTTNBP2	-0.154745	0.241676
ACTL6B	0.443058	0.0762758
RARB	0.0522117	0.597124
TOP2B	-0.0611791	0.21104
TM9SF3	-0.0193218	0.747586
NFKB2	0.272527	2.77959e-05
UBE2T	1.26822	2.59097e-54
PPP1R12B	-0.531934	6.13245e-10
DNAJC10	0.360141	5.715e-10
GTF3C1	0.226698	3.91522e-07
IL4R	0.123573	0.032683
USP33	0.0216835	0.658575
PAK3	-0.614262	0.00133437
CAPN6	-1.09106	8.74251e-07
DCX	0.0258522	0.937373
SNRPA	0.369799	2.83569e-13
SPAG6	-1.02193	5.1571e-07
EXOSC5	0.281577	0.000251555
DYNC1I2	0.158749	2.11272e-05
APBB1IP	-0.128432	0.153347
LRCH4	-0.135957	0.0222074
FAM76B	-0.0370067	0.482341
SIRT6	0.166175	0.00607613
TYR	-1.08199	0.00112294
POLD3	0.390814	8.28205e-24
ACTN2	-0.723023	1.57622e-07
CAPZB	0.115128	0.00467045
GPR137B	0.0957084	0.192943
NAALAD2	-0.51797	3.06508e-08
JADE1	-0.242675	0.00173408
SLC25A43	0.234914	2.46468e-05
UBE2A	0.0162387	0.775862
FGFR1	0.198802	0.0490717
FKBP6	-0.481296	0.000602347
SMC1B	1.36167	2.29091e-14
FBLN1	-0.246292	0.016463
ITGA8	-1.02155	1.65669e-25
CST7	0.00796142	0.954143
MAP2	0.278754	0.0467253
PIAS2	-0.167159	0.0138984
AMPH	-0.24815	0.152248
ARAF	-0.0474664	0.384233
MCCC1	-0.252494	0.000186701
LAMP3	-0.649432	1.59486e-07
FAP	0.0100206	0.94246
NEBL	-0.00385067	0.97388
ACER3	-0.0295079	0.625826
UBE2K	0.231296	5.23403e-07
PIK3C3	-0.151187	0.0068765
N4BP2	0.0566253	0.503204
TIGAR	-0.0550204	0.428112
TULP3	0.317472	1.78296e-11
SYNJ2	0.463952	2.30406e-13
ADCY2	-1.37113	1.61995e-19
PPP2R5C	-0.224006	5.81336e-08
RBFOX1	-1.44921	1.1526e-07
GNB1	0.245026	1.52961e-10
HOXA9	1.15804	1.3052e-13
EDN1	0.099098	0.432067
MLLT10	-0.0908959	0.0603561
ZCWPW1	-0.237232	0.00198839
ADCYAP1R1	-0.328989	0.00889731
FGF20	-0.352343	0.0834563
P2RY10	-0.504276	7.834e-07
ITM2A	-0.660573	2.2645e-14
NRDC	0.261947	6.09168e-12
VDAC3	0.511792	1.23694e-14
PCM1	-0.060768	0.443805
TNRC6C	-0.231634	0.000445303
CBFA2T2	0.18587	0.00127093
BRINP1	-0.749218	0.00247912
ITCH	0.106899	0.0289599
PKD2L2	-1.27393	1.04985e-19
TP53INP2	0.375813	1.88273e-06
SDF4	0.0805701	0.161549
MYH7B	-0.0736024	0.562022
BPIFB2	0.578724	0.0556586
TP73	0.0568964	0.652041
TOLLIP	-0.125418	0.0101844
UBE2D4	-0.074632	0.141724
CLUL1	-0.810015	3.17872e-09
RUNX1T1	-0.649994	1.2401e-10
CDH17	1.42972	6.7521e-10
THOC1	0.102648	0.0733366
FKBP7	-0.102248	0.11634
OSBPL6	-0.49421	3.09782e-05
SLC1A3	-0.122205	0.284444
XRCC5	0.297161	2.39331e-15
LXN	-0.0685732	0.384434
SP140	-0.176466	0.0957515
MKNK1	-0.0355999	0.420246
TNS1	-0.647969	2.34465e-17
REXO1	0.289338	6.94732e-09
SAR1A	-0.0356283	0.362389
CDC14A	-0.372099	5.09142e-07
RAPGEF3	-0.569554	1.80439e-11
CEACAM1	-0.0373355	0.755258
SENP1	0.434984	1.26301e-25
DUSP13	1.38502	2.12536e-09
CIC	0.125713	0.0292524
LIPE	-0.000298741	0.998105
FDFT1	0.0365613	0.668343
PAFAH1B3	0.540865	2.28677e-10
OPHN1	-0.610793	4.63299e-15
AFM	0.0531242	0.880366
KIF22	0.798106	2.16772e-56
SCGN	0.371349	0.238687
CARMIL1	0.0987576	0.126408
PGM1	0.275741	2.65499e-06
DDX1	0.255434	1.55288e-10
DNM2	-0.0977422	0.0371337
EPB41L2	-0.0982349	0.238557
RIMS1	-1.25906	1.22842e-10
MOXD1	-0.486717	4.29123e-07
STX7	-0.201421	2.16033e-05
RABL2B	-0.290022	3.98085e-07
KEAP1	0.113224	0.06181
DDX43	0.0478998	0.829566
PTPRH	0.646106	4.37873e-05
DCT	-1.01976	9.12615e-12
SLC35C2	0.0864665	0.0740685
CRYBG3	-0.131906	0.221395
EPHA6	0.720166	0.0011881
SCTR	-1.62195	4.39965e-22
RFX3	-0.447682	1.25849e-07
RIF1	0.130292	0.035409
RAB21	0.0138504	0.807676
SLC4A4	-0.870867	5.86971e-12
SMARCA2	-0.454569	3.17146e-14
RDH8	0.0520318	0.886175
SESN1	-0.585798	5.00592e-21
MID2	-0.248325	0.000197763
DNAAF6	-1.53603	6.42025e-12
COL5A3	0.386673	0.000586917
SRCAP	-0.108098	0.0896159
PUM3	0.23587	2.96786e-05
CPB2	-1.79197	2.69837e-17
CHRNA3	0.101582	0.524078
KCNN2	-0.0736886	0.545229
CNOT4	0.00248758	0.957256
PSEN1	0.048399	0.226377
CPOX	0.15901	0.00753697
CLDND1	0.138165	0.0103386
MOK	-0.107569	0.189904
HSP90AA1	0.500794	2.91673e-20
RBL1	0.640515	3.53976e-26
DLGAP4	0.310717	6.22532e-10
IGSF9B	-1.32358	2.46199e-18
CFHR2	-0.115879	0.831093
NDC80	1.63903	1.86767e-84
AP4E1	0.0181828	0.743307
RSBN1	-0.262851	2.11808e-08
MAGI3	-0.532312	6.73392e-11
CXCL2	-0.421127	0.00114215
AFP	1.81704	2.49304e-11
COL4A4	-0.612724	3.67171e-08
TCF7	-0.128211	0.141275
OSTM1	-0.0616429	0.300992
CDH7	2.10221	3.33971e-16
IMPG2	-0.45146	1.80063e-05
PCNP	0.029747	0.555194
EXD2	0.0714846	0.104827
ARG2	0.374499	0.000968979
MEF2C	-0.7521	2.0265e-21
PTPRC	-0.368563	0.000239051
CACNA1S	-0.0684628	0.770448
PKP1	-0.678141	0.00300581
UBA5	0.00428474	0.931236
STK17B	-0.448171	1.03155e-12
CDC14B	-0.166855	0.00500224
ZNF510	-0.234032	1.00487e-06
LRP2	-0.489525	0.0116172
ZNF506	-0.490243	1.98965e-11
JMJD4	0.105582	0.0631148
DUSP12	0.223992	2.01917e-07
AACS	0.450481	3.36958e-14
DELE1	-0.409906	7.23957e-24
SLC13A1	-0.456206	0.227769
CADPS2	-0.32466	5.63145e-06
PCDHB4	-0.396928	1.41454e-05
PCDHA6	0.622274	0.000916399
PCDHGA2	0.156448	0.28893
HSPB11	0.133786	0.0151115
PHLPP1	0.26802	8.32727e-05
ATP8B1	-0.024936	0.807645
IL12RB2	0.955323	2.70436e-12
SMARCD3	-0.602872	2.12876e-13
WDR70	0.0965577	0.0564643
FYB1	-0.0385723	0.744985
MPP4	-0.357613	0.0220189
STRADB	-0.0631621	0.361173
BZW1	0.458349	2.87956e-15
PGR	-1.18194	1.81848e-27
C1QTNF3	-0.291583	0.0181406
ME2	0.0264143	0.662488
C5orf22	0.391099	1.09946e-14
CCNT2	-0.234009	1.38587e-07
FAM135A	0.0481621	0.565025
COL19A1	-0.969599	4.10008e-09
EPB41L3	0.208103	0.0424781
COBLL1	-0.459476	4.55929e-10
DLG3	-0.022452	0.705333
KCNK2	0.929814	5.86741e-06
SERTAD4	-0.176608	0.139165
TRAF5	-0.235524	0.00288307
MRPL22	0.0797648	0.190845
GEMIN5	0.199365	1.14183e-05
OPRK1	0.123267	0.690396
NFE2L1	0.190849	0.000116081
SEMA5B	0.66949	7.71135e-08
GSK3B	0.173184	0.000434235
ITGB5	0.115267	0.106815
ERC1	0.235792	6.54309e-05
XPO1	0.26909	4.08869e-10
RNF13	-0.135968	0.00515084
TRPM3	-0.883958	4.92304e-09
PALB2	0.245185	8.78927e-10
DOP1A	-0.442021	5.20181e-12
LYRM2	-0.0189858	0.722939
BCKDHB	-0.133639	0.0147942
KAT6A	0.120155	0.0817759
TUT7	-0.068434	0.251673
ULK2	-0.266259	3.75634e-06
GRHL2	0.147106	0.0284652
TNPO1	0.108151	0.0551484
PLOD1	0.420808	7.75339e-12
P2RX5	-0.00106657	0.994608
ITGAE	0.0714756	0.313817
DIS3	0.0222387	0.662314
PIBF1	-0.257826	8.91354e-07
TDRD3	-0.444818	8.23665e-20
NUFIP1	0.26025	1.31453e-09
PDS5B	-0.0598649	0.279449
OXCT1	0.366937	0.000231157
RRAGB	-0.189143	1.27883e-05
EPYC	0.389456	0.119313
CYLD	-0.356407	1.95423e-11
SLC27A5	0.146402	0.120653
ZNF324	-0.0307494	0.524036
ZNF671	-0.505014	5.33289e-13
ZNF416	-0.00938543	0.884032
ZNF586	-0.417756	3.99714e-13
ZNF446	-0.0255076	0.636708
ZNF264	-0.346297	4.38894e-10
RPS5	0.0470248	0.641229
FAT1	0.275403	0.00795629
YTHDC1	-0.0311486	0.323417
CHMP2B	0.0848033	0.106358
SMAP2	-0.265053	1.20136e-06
PPIE	-0.0122845	0.815482
ZMPSTE24	0.108853	0.0229726
STARD7	0.126759	0.000635264
NOA1	0.0932824	0.0536758
REST	-0.0902332	0.0889455
HAL	0.943473	4.22503e-08
SSH1	0.162605	0.00220015
GSTP1	0.00691527	0.948032
APLP2	-0.256335	0.000131797
FAM234B	0.416463	2.3843e-08
SLCO1A2	0.709194	0.00539476
WBP11	0.508644	3.14795e-30
EIF3I	0.156633	0.00322969
NKAIN1	2.32791	1.40081e-38
COL16A1	-0.139899	0.143379
TXLNA	0.0489232	0.205212
APOB	0.540787	0.0111293
NCOA1	0.00746168	0.908917
AGBL5	0.272309	5.30469e-08
EFR3B	0.272413	0.0402424
KIF3C	0.957765	2.83779e-23
RAB10	0.459234	2.17416e-22
GCKR	0.443954	0.0195865
HADHA	0.164561	1.39071e-05
MAPRE3	-0.223529	0.0017866
CAD	0.774578	2.17669e-43
CD59	-0.458005	2.17533e-11
CD82	-0.26989	0.00178752
BCORL1	0.267401	2.68698e-05
ATRX	-0.276091	5.55119e-06
AK6	0.0160489	0.745149
FCN1	-0.544216	1.01698e-05
MYNN	0.00467011	0.941251
MECOM	-0.905669	3.72362e-19
SCAMP1	-0.0875586	0.131155
PREP	0.151905	0.000664022
HACE1	-0.0247931	0.722108
SEH1L	0.341562	8.38507e-11
WDR47	-0.126002	0.00804846
WDFY1	0.0546054	0.284382
OVGP1	-0.657324	3.70505e-10
SLC25A24	0.21333	0.000884978
MAP3K4	0.0483285	0.325142
PILRA	0.0387701	0.716043
IGSF9	0.675114	1.08074e-10
ABCB1	-0.10393	0.382149
ZNF213	-0.025635	0.709591
AKR1B1	0.826152	3.4134e-14
CPNE3	-0.0855869	0.14614
RRN3	0.0817511	0.0578116
CTTN	0.094798	0.0985821
WNT11	-0.671934	1.22611e-06
MTIF2	0.39905	3.62187e-27
DDHD2	0.414266	8.15299e-09
TTC39A	-0.0159476	0.891646
EPS15	-0.184131	8.63709e-07
ORC1	1.6377	3.64669e-100
MGST2	-0.200852	0.000918306
CHERP	0.378552	7.18469e-13
ATG16L1	0.211773	8.54058e-08
USP40	0.0946808	0.0670793
POMGNT1	-0.0810555	0.125153
RAD54L	1.63597	4.93087e-93
MAST2	0.417627	6.71065e-15
DNAJA1	0.349693	2.03076e-13
B4GALT1	0.40642	4.72217e-11
CHMP5	0.0970424	0.102574
NFX1	-0.0868589	0.0476498
AQP6	-0.779937	9.03449e-05
DIMT1	0.0688131	0.233442
IPO11	0.0388203	0.49461
FOLH1	0.400299	0.000396981
EIF2AK1	0.285552	4.76301e-10
NME8	-0.346121	0.00173151
EPDR1	-0.638401	8.29076e-10
SNX10	0.208179	0.0287996
SEPHS1	0.296867	7.27888e-13
MRPL28	0.21518	0.000531535
HBQ1	1.91491	5.10087e-15
ITPKC	0.0594281	0.471066
CEACAM6	-0.212379	0.156701
FAT2	0.687898	0.000639838
RBM22	-0.00757613	0.844198
TMED2	0.27134	1.76931e-06
ERO1B	-0.696315	1.32627e-08
ZFAND6	-0.091568	0.0601179
HSD17B2	-0.931656	1.68462e-05
TXLNG	-0.0354324	0.515724
PPEF1	-0.00314011	0.984869
LAT2	-0.00634811	0.949606
HUWE1	0.298813	9.61456e-09
ZW10	0.341297	3.88102e-16
ALG9	0.209641	0.00850795
MYBPC2	-0.30798	0.039055
NOX4	-0.0246268	0.845212
ACOX3	-0.185112	0.00047726
MTMR2	0.227105	2.74044e-05
PPP1R15A	-0.0315486	0.702572
HSD17B14	0.197423	0.0896118
TRIP6	0.0921648	0.325846
ACHE	0.051617	0.791665
FTL	0.0710598	0.477543
SRRT	0.411497	1.25186e-20
BAX	0.25583	2.92432e-06
NLK	0.0419079	0.369834
PIGS	0.292693	2.99888e-09
ADAMTS2	0.317984	0.00207155
TMPRSS11E	0.986027	6.94933e-06
ATXN7L3	0.327484	8.31532e-16
PGS1	-0.130305	0.00737515
PSMC5	0.264481	2.58625e-08
UIMC1	-0.0427406	0.294803
CETP	-0.0887543	0.27951
MMP2	-0.0758421	0.504825
MT3	0.407855	0.0487263
LPCAT2	-0.384958	2.27071e-07
GNAO1	-0.219692	0.0788826
OGFOD1	0.10138	0.00797488
SH3BP2	0.282628	1.83336e-07
NOP14	0.298419	3.75765e-12
ADD1	-0.0409305	0.278595
L2HGDH	0.301786	3.22016e-07
TXNDC16	0.167787	0.029814
RTRAF	0.170909	0.000433375
NID2	0.389981	0.000325499
GMCL1	0.0777716	0.0914869
SF3B2	0.333834	5.67594e-19
KLHL42	0.270558	4.31858e-06
GNAS	0.0292804	0.679423
DNM1L	0.419603	1.3738e-15
PTHLH	0.615334	0.00042752
PHACTR3	-0.241537	0.253791
ERGIC2	0.358391	1.3859e-10
TFAP2C	0.145226	0.148707
AURKA	1.39578	8.84558e-59
CASS4	-0.666372	1.34746e-14
PIR	0.34428	0.00479622
AAMDC	-0.0867976	0.13242
RFX2	-0.481878	2.56637e-09
METTL2A	0.22201	7.10489e-07
SULT2B1	0.811663	7.38065e-10
ALG6	0.0989269	0.0425752
CNOT3	0.326745	9.86671e-12
GP6	-0.381862	0.0113202
PTPN4	-0.599498	9.4221e-24
DDX18	0.288994	8.71163e-14
KHSRP	0.434541	3.11025e-23
GNA11	0.10481	0.0475525
ASAP3	-0.245706	0.00227612
EDEM2	-0.0711719	0.216737
DNMT3B	1.28698	5.02059e-40
REM1	-0.576163	5.09222e-11
TPX2	2.04083	1.11756e-134
PDRG1	0.370466	8.58326e-10
EPB41L1	-0.120638	0.0731578
SLC15A1	1.22143	7.58437e-09
DOCK9	-0.436083	1.11477e-09
ANKRD10	-0.319164	6.02113e-07
TGDS	0.0228839	0.724804
DOCK3	0.378387	0.00695429
C3orf18	-0.395209	2.62441e-10
COQ9	0.0669354	0.229128
TMEM40	0.783784	6.09726e-07
KIF9	-0.26517	1.04857e-05
ARHGAP28	-0.0761111	0.501478
CRLS1	-0.586365	4.29419e-09
DEFB127	-0.29668
PPP1R13B	-0.390387	4.31545e-08
ATRN	-0.0680525	0.246652
SMOX	0.80903	2.20104e-15
SIGLEC1	-0.0366875	0.778635
FKBP1A	0.091698	0.0350297
NSFL1C	0.166333	0.000198234
SLC4A11	0.443127	0.00202583
C20orf194	-0.386643	1.40812e-11
ZNF343	0.0408767	0.444147
EBF4	-0.345958	0.000536135
CPXM1	0.334236	0.00630924
MAVS	-0.0120518	0.838547
LZTS3	-0.217322	0.0133567
F11	-1.76187	5.31991e-17
XRN2	0.170503	0.000227976
KIZ	-0.305159	1.93821e-10
DYNLL1	0.278236	2.90911e-08
TESC	0.253843	0.213049
SNX5	-0.00810004	0.876684
RPL6	0.0138277	0.839287
SIRPG	0.0704149	0.573501
MAPKAPK5	0.153901	4.99369e-05
P2RX7	-0.0609912	0.602657
ESF1	0.361543	2.54848e-12
RBBP9	-0.161346	0.00458421
ANAPC5	0.196728	6.47082e-07
SLC23A2	0.0705761	0.312177
SLC8B1	0.151454	0.00447473
TMEM230	-0.0253835	0.659303
DZANK1	-0.124434	0.0640835
KDM2B	0.148476	0.000443838
CFAP61	-1.01825	1.04558e-10
LHX5	1.38819	2.82046e-07
TASP1	-0.0727297	0.15111
OAS1	0.625533	2.78401e-10
GCN1	0.480025	3.96712e-24
RPLP0	0.258336	0.000635348
PXN	0.362949	9.13186e-10
SIRT4	-0.349496	2.98433e-07
RPH3A	0.210478	0.199031
KIF16B	-0.290404	6.43904e-07
TRMT6	0.410991	4.86412e-15
CHGB	1.26831	5.59965e-07
PEBP1	-0.245051	3.10406e-05
TBX5	-0.773707	3.02489e-20
BRAP	0.164396	1.35513e-06
ERP29	-0.0244533	0.76012
NOS1	0.574855	0.00452545
FUS	0.145452	0.00156344
IGBP1	-0.135373	0.0107342
FXYD5	-0.0197109	0.858751
ZNF302	-0.189246	0.000543257
GRAMD1A	0.109842	0.16873
FXYD3	-0.294677	0.0669444
HEPH	-0.195225	0.0729577
CDIP1	-0.304703	6.57604e-06
CMTM1	0.165635	0.0348246
KCNH4	0.180842	0.140549
GANAB	0.384036	8.76974e-18
GMIP	0.00426608	0.944755
RBM41	-0.0345134	0.576906
BIRC5	1.73607	6.8178e-77
LAG3	0.468031	0.000135156
MLF2	0.399538	2.01933e-11
OTUB2	0.55852	4.68546e-13
DDX24	-0.0783382	0.0602253
ZBTB25	-0.372355	3.61851e-11
NECAP1	0.0922362	0.0504131
ARHGAP4	0.251557	0.00455947
ANKRD24	-0.479988	6.04655e-05
DHX32	-0.0358495	0.604397
RCOR1	0.0855102	0.141602
GPATCH2L	-0.126331	0.0489326
LTBP4	-0.343962	0.000146358
BLVRB	0.211324	0.0338552
SLC9A1	-0.099841	0.215602
SPTLC1	0.0960756	0.0175067
PAPOLA	0.136655	0.00478083
CCNK	0.314633	3.2953e-10
PCBP4	0.135289	0.0442381
RGS1	-0.469833	3.46262e-05
YPEL3	-0.336676	1.20973e-06
MRPS33	0.170557	0.00899727
NDUFB2	0.0329412	0.623825
NUDC	0.24192	5.42867e-06
MAEA	0.223955	4.13127e-08
ICAM1	-0.103168	0.379675
STRN4	0.404868	1.9032e-16
IRAK3	-0.379959	0.0013991
LYZ	-0.492227	0.00038699
SI	-0.0846727	0.889285
MUL1	0.0677629	0.191443
TFAP4	0.167319	0.00238875
PDCD7	-0.00304441	0.936521
SPG21	-0.00713946	0.876255
FETUB	0.914837	0.000404493
DNAJB11	0.442348	9.78824e-22
P3H2	-0.594869	5.03238e-05
THPO	0.561261	0.00283143
CHRD	-0.0257536	0.876573
FLT3LG	-0.517689	1.14317e-06
RAB11FIP3	-0.166769	0.00947155
GNPTG	-0.321019	2.05204e-08
ZNF268	-0.0780019	0.144776
GOLGA3	0.143188	0.00723575
PABPC4	0.0301805	0.577958
CD209	0.423175	0.000154997
CERS4	-0.223913	0.0405099
MCOLN1	0.0214271	0.741222
USP48	-0.168327	1.3826e-05
EFNB1	-0.0497249	0.665404
PDPR	-0.161626	0.0059121
AARS1	0.244649	6.23705e-06
GLG1	0.063174	0.199397
KIF4A	1.91673	2.99182e-129
TNRC6A	-0.129885	0.0143244
PLEKHG2	0.258044	0.00996487
DLL3	1.88615	5.66784e-15
NAT14	-0.0331522	0.714538
PITPNM2	0.219478	0.00399297
EXOC1	0.0547635	0.220158
RBM27	-0.0345745	0.462675
POU4F3	0.0227177	0.889338
OSBPL8	-0.0619767	0.357318
DTX2	0.332488	2.58945e-05
NLRC4	-0.242306	0.00451787
PUS7	0.472778	7.13243e-16
LAMB4	0.00294864	0.984793
NRCAM	1.14271	8.73612e-14
LAMB1	0.307197	0.000155028
SLC26A4	-0.241741	0.252498
SLC26A3	-0.878439	8.43209e-06
DLD	0.324741	1.43055e-11
WDR7	-0.166523	0.00132094
TXNL1	0.0160978	0.806074
IL5RA	-1.369	5.12842e-20
ABCC6	-0.868627	4.33195e-19
CMTM6	0.0107786	0.851291
ITGA6	0.614855	1.2891e-07
RAPGEF4	-0.04611	0.649624
MAP3K20	0.201811	0.00409012
SMPX	-0.320109	0.133792
FH	0.251163	6.53077e-07
SEL1L3	-0.196624	0.00162259
TF	1.17677	1.47901e-07
CDV3	0.252592	1.09024e-08
MYO15A	-0.356956	0.000158466
ALKBH5	0.0306063	0.515486
APOH	-0.963338	1.53842e-06
NLRP1	-0.62491	7.83369e-13
PITPNM3	-0.423472	1.98937e-06
SPAG7	-0.15879	0.00683707
ORC6	1.27409	3.97667e-59
ZFHX4	0.424194	0.0138704
SLC17A6	-0.8241	0.225828
CPA1	0.733216	0.00074176
ZC3HC1	0.384654	3.96411e-19
ESR1	0.00390993	0.983287
RGS17	0.0325365	0.839439
ANGPT2	0.423147	0.000207155
TMEM101	-0.0364889	0.605337
CD200	-0.155157	0.0524638
CCDC80	-0.2082	0.0703204
CMA1	-1.26483	1.42816e-15
PSME1	0.0713649	0.297385
PPP2R3C	0.0149051	0.846631
HAUS4	-0.0740856	0.276383
JPH4	-0.639192	1.70956e-10
MYH7	0.857237	5.30081e-05
CEBPE	-0.22586	0.113606
SLC7A8	-0.531776	8.77021e-06
OSGEP	-0.0950563	0.0721655
SLC22A17	-0.267259	0.017585
RNF31	-0.0763701	0.429433
SCFD1	0.000261897	0.997443
G2E3	0.500117	4.25034e-12
HECTD1	-0.0602438	0.32169
HNRNPC	0.259654	6.67504e-11
RPGRIP1	-0.0785431	0.348553
SUPT16H	0.485677	2.56129e-27
TOX4	0.148902	5.70637e-05
GEMIN2	0.402493	3.06765e-07
TGM1	-0.109207	0.311544
TINF2	0.0524414	0.243337
DAZL	0.0542226	0.815867
TBL1Y	-0.396064	0.356069
SEMA6A	-0.155899	0.167884
TRPM7	-0.303008	1.25623e-07
TYRO3	0.303178	0.000589997
WDR76	1.02545	7.48389e-63
CAPN3	-1.47332	5.94526e-36
SNAP23	-0.132157	0.0114782
TBX15	0.236551	0.16578
PHGDH	1.27814	2.29541e-23
COL9A3	0.609051	4.36453e-06
EZR	-0.0899562	0.219587
MYL6	0.104642	0.125831
AGO1	0.0336631	0.537029
TEKT2	-0.811678	1.96186e-06
CLSPN	1.61012	3.64945e-95
RFFL	0.447028	1.99099e-19
UNC13D	0.592337	5.95549e-09
MFSD11	0.148929	0.000933005
DPYSL2	-0.71779	6.22074e-24
TGFB2	0.198629	0.144712
GPATCH2	-0.000848254	0.98987
NUP50	0.22577	5.88459e-08
CDC45	1.71381	4.0909e-96
COMT	0.00323777	0.969102
ADA2	-0.214708	0.015201
VNN3	-0.417896	0.0163611
ECHDC1	-0.368271	4.53998e-10
LRRFIP2	-0.151871	0.00018446
SEC22C	-0.104756	0.00163974
XYLB	0.381119	3.77417e-08
HDAC6	0.121482	0.0261311
OR1I1	-0.220441	0.252247
GABRP	0.322658	0.16925
KRT31	1.32659	2.82122e-05
CDC6	1.74404	3.97995e-106
UPRT	-0.277498	7.12599e-11
CDC23	0.0966313	0.00691307
AAAS	0.171746	0.00020978
CBX5	0.227524	0.000391589
[truncated: 17,963 more rows]
