# Supplementary material for: PLK1 overexpression as a dual-role biomarker and therapeutic vulnerability in pulmonary adenocarcinoma
Source: PeerJ journal article supplement (doi:10.7717/peerj.20618), 2026-01-15
Supplement: additional_files.tar [file Figure 7A related data.xlsx]

## Sheet: Sheet1
	Ctrl			GSK461364
0	0.1214	0.166	0.163	0.168	0.164	0.17
1	0.4511	0.517	0.478	0.322	0.315	0.318
2	0.787167	0.835	0.848	0.695	0.712	0.696
3	1.28373	1.52	1.55	1.09	0.996	0.889
4	1.9337	1.97	1.83	1.39	1.26	1.27
