# Supplementary material for: PLK1 overexpression as a dual-role biomarker and therapeutic vulnerability in pulmonary adenocarcinoma
Source: PeerJ journal article supplement (doi:10.7717/peerj.20618), 2026-01-15
Supplement: additional_files.tar [file Figure 7D related data.xlsx]

## Sheet: Sheet1
Sample	PBS-1	PBS-2	PBS-3	GSK461364-1	GSK461364-2	GSK461364-3
Early Apoptosis Rate	0.32	0.33	1.13	1.2	1.63	2.07
Late Apoptosis Rate	2.01	2.16	3.22	9.56	9.69	10.7
Total Apoptosis Rate	2.33	2.49	4.35	10.76	11.32	12.77
