# Supplementary material for: PLK1 overexpression as a dual-role biomarker and therapeutic vulnerability in pulmonary adenocarcinoma
Source: PeerJ journal article supplement (doi:10.7717/peerj.20618), 2026-01-15
Supplement: additional_files.tar [file Figure 7G related data.xlsx]

## Sheet: Sheet1
	PBS			GSK461364
G1	17.6	27	25.5	33.1	23.8	46.3
S	55.5	53.7	53.3	28.7	38.4	20.1
M	24.2	18.5	20.2	38.2	37.7	34.6
	PBS			GSK461364
G1/S	73.1	80.7	78.8	61.8	62.2	66.4
G2/M	24.2	18.5	20.2	38.2	37.7	34.6
