# Supplementary material for: PLK1 overexpression as a dual-role biomarker and therapeutic vulnerability in pulmonary adenocarcinoma
Source: PeerJ. 2026 Jan 15;14:e20618. doi: 10.7717/peerj.20618 (PMC12812279; doi:10.7717/peerj.20618)
Supplement: Supplemental Information 1 [file peerj-14-20618-s001.xlsx]

## Sheet: Sheet 1
ONTOLOGY	ID	Description	GeneRatio	BgRatio	pvalue	p.adjust	qvalue	geneID	Count
BP	GO:0007059	chromosome segregation	80/260	348/18800	3.09218e-76	5.92771e-73	4.62851e-73	CDCA5/CDC20/KIF4A/KIF2C/NCAPH/CDCA8/KIF18B/KIFC1/ESPL1/HJURP/KIF23/SKA3/BUB1B/NEK2/SPAG5/NCAPG/AURKB/CDC6/DLGAP5/BUB1/ZWINT/NDC80/CDT1/SKA1/RACGAP1/CCNB1/TACC3/FEN1/SPC25/MKI67/TOP2A/MAD2L1/TTK/NUF2/SPC24/CDCA2/KIF14/FAM83D/SGO1/UBE2C/INCENP/TRIP13/CENPF/CENPW/CENPE/EME1/NCAPD2/PSRC1/DSCC1/NCAPG2/HASPIN/CENPN/ESCO2/BRCA1/SGO2/KNL1/FBXO5/KIF22/ECT2/CCNE1/KIF18A/CENPH/KNSTRN/MIS18A/PSMC3IP/PTTG1/OI…	80
BP	GO:0000280	nuclear division	83/260	446/18800	4.2442e-71	4.06806e-68	3.17645e-68	TPX2/CDCA5/CDC20/KIF4A/KIF2C/NCAPH/CDCA8/KIF18B/KIFC1/PKMYT1/ESPL1/MYBL2/CCNB2/KIF23/BUB1B/NEK2/SPAG5/NCAPG/AURKB/CDC6/RAD51/DLGAP5/BUB1/KIF11/ZWINT/NDC80/CDT1/RACGAP1/CCNB1/TACC3/RAD54L/MKI67/CDC25C/TOP2A/MAD2L1/TTK/NUF2/AURKA/ANLN/KIF15/CHEK1/CDCA2/KIF14/SGO1/UBE2C/INCENP/RAD51AP1/TRIP13/CENPF/CENPE/EME1/NCAPD2/UBE2S/PSRC1/DSCC1/ASPM/NCAPG2/HASPIN/SGO2/FBXO5/FANCA/KIF22/RANBP1/CCNE1/KIF18A/KNST…	83
BP	GO:0048285	organelle fission	85/260	493/18800	5.61156e-70	3.58578e-67	2.79987e-67	TPX2/CDCA5/CDC20/KIF4A/KIF2C/NCAPH/CDCA8/KIF18B/KIFC1/PKMYT1/ESPL1/MYBL2/CCNB2/KIF23/BUB1B/NEK2/SPAG5/NCAPG/AURKB/CDC6/RAD51/DLGAP5/BUB1/KIF11/ZWINT/NDC80/CDT1/RACGAP1/CCNB1/TACC3/MTFR2/RAD54L/MKI67/CDC25C/TOP2A/MAD2L1/TTK/NUF2/AURKA/ANLN/KIF15/CHEK1/CDCA2/KIF14/SGO1/UBE2C/INCENP/RAD51AP1/TRIP13/CENPF/CENPE/EME1/NCAPD2/UBE2S/PSRC1/DSCC1/ASPM/NCAPG2/HASPIN/SGO2/FBXO5/FANCA/KIF22/RANBP1/CCNE1/KIF18…	85
BP	GO:0098813	nuclear chromosome segregation	68/260	287/18800	2.87735e-65	1.37897e-62	1.07674e-62	CDCA5/CDC20/KIF4A/KIF2C/NCAPH/CDCA8/KIF18B/KIFC1/ESPL1/KIF23/BUB1B/NEK2/SPAG5/NCAPG/AURKB/CDC6/DLGAP5/BUB1/ZWINT/NDC80/CDT1/RACGAP1/CCNB1/TACC3/FEN1/SPC25/TOP2A/MAD2L1/TTK/NUF2/SPC24/KIF14/FAM83D/SGO1/UBE2C/INCENP/TRIP13/CENPF/CENPE/EME1/NCAPD2/PSRC1/DSCC1/NCAPG2/HASPIN/ESCO2/SGO2/KNL1/FBXO5/KIF22/ECT2/CCNE1/KIF18A/KNSTRN/PSMC3IP/PTTG1/TUBG1/FANCD2/RMI2/SPDL1/ZWILCH/BRIP1/NDC1/CENPK/DSN1/RAN/SMC2…	68
BP	GO:0140014	mitotic nuclear division	67/260	293/18800	3.82995e-63	1.4684e-60	1.14657e-60	TPX2/CDCA5/CDC20/KIF4A/KIF2C/NCAPH/CDCA8/KIF18B/KIFC1/PKMYT1/ESPL1/MYBL2/KIF23/BUB1B/NEK2/SPAG5/NCAPG/AURKB/CDC6/DLGAP5/BUB1/KIF11/ZWINT/NDC80/CDT1/RACGAP1/CCNB1/TACC3/MKI67/CDC25C/MAD2L1/TTK/NUF2/AURKA/ANLN/KIF15/CHEK1/CDCA2/KIF14/SGO1/UBE2C/TRIP13/CENPF/CENPE/NCAPD2/UBE2S/PSRC1/DSCC1/NCAPG2/HASPIN/SGO2/FBXO5/KIF22/RANBP1/KIF18A/KNSTRN/KIF20B/PTTG1/TUBG1/SPDL1/ZWILCH/CENPK/DSN1/BORA/RAN/SMC2/NCA…	67
BP	GO:0006260	DNA replication	62/260	280/18800	2.44311e-57	7.66321e-55	5.98363e-55	CCNA2/CDC45/RRM2/CDC6/RAD51/MCM10/CDT1/ORC1/FEN1/TICRR/CHEK1/CDK1/DTL/MCM4/ORC6/EME1/MCM6/MCM2/TIMELESS/CHAF1A/DSCC1/GINS2/RFC4/TRAIP/MCM7/ESCO2/GINS1/HMGA1/FBXO5/E2F8/BLM/ALYREF/POLQ/CHAF1B/GINS4/RECQL4/CCNE1/GINS3/DBF4/CDK2/WDHD1/DBF4B/FAM111B/PIF1/RFC3/E2F7/MCM5/PCLAF/CDC7/RFC5/PCNA/RMI2/PRIM1/TONSL/RFC2/MCM3/POLE2/POLE/RRM1/TOPBP1/RUVBL1/SSRP1	62
BP	GO:0000819	sister chromatid segregation	56/260	205/18800	2.79825e-57	7.66321e-55	5.98363e-55	CDCA5/CDC20/KIF4A/KIF2C/NCAPH/CDCA8/KIF18B/KIFC1/ESPL1/KIF23/BUB1B/NEK2/SPAG5/NCAPG/AURKB/CDC6/DLGAP5/BUB1/ZWINT/NDC80/CDT1/RACGAP1/CCNB1/TACC3/FEN1/TOP2A/MAD2L1/TTK/NUF2/KIF14/SGO1/UBE2C/TRIP13/CENPF/CENPE/NCAPD2/PSRC1/DSCC1/NCAPG2/HASPIN/ESCO2/SGO2/FBXO5/KIF22/KIF18A/KNSTRN/PTTG1/TUBG1/RMI2/SPDL1/ZWILCH/CENPK/DSN1/RAN/SMC2/NCAPD3	56
BP	GO:0000070	mitotic sister chromatid segregation	52/260	171/18800	7.06484e-56	1.69291e-53	1.32187e-53	CDCA5/CDC20/KIF4A/KIF2C/NCAPH/CDCA8/KIF18B/KIFC1/ESPL1/KIF23/BUB1B/NEK2/SPAG5/NCAPG/AURKB/CDC6/DLGAP5/BUB1/ZWINT/NDC80/CDT1/RACGAP1/CCNB1/TACC3/MAD2L1/TTK/NUF2/KIF14/SGO1/UBE2C/TRIP13/CENPF/CENPE/NCAPD2/PSRC1/DSCC1/NCAPG2/HASPIN/SGO2/FBXO5/KIF22/KIF18A/KNSTRN/PTTG1/TUBG1/SPDL1/ZWILCH/CENPK/DSN1/RAN/SMC2/NCAPD3	52
BP	GO:0006261	DNA-templated DNA replication	48/260	159/18800	2.31974e-51	4.94105e-49	3.8581e-49	CDC45/CDC6/RAD51/MCM10/CDT1/ORC1/FEN1/TICRR/MCM4/ORC6/EME1/MCM6/MCM2/TIMELESS/DSCC1/GINS2/RFC4/TRAIP/MCM7/GINS1/HMGA1/FBXO5/E2F8/BLM/ALYREF/POLQ/GINS4/RECQL4/CCNE1/GINS3/DBF4/CDK2/WDHD1/DBF4B/RFC3/E2F7/MCM5/CDC7/RFC5/PCNA/PRIM1/TONSL/RFC2/MCM3/POLE2/POLE/RRM1/TOPBP1	48
BP	GO:0044772	mitotic cell cycle phase transition	61/260	440/18800	1.624e-43	3.11321e-41	2.43087e-41	CDCA5/FOXM1/GTSE1/PKMYT1/ESPL1/CCNA2/CCNB2/BUB1B/AURKB/RRM2/CDC6/DLGAP5/BUB1/ZWINT/NDC80/CDT1/ORC1/CCNB1/MELK/TACC3/CDC25C/MAD2L1/TTK/TICRR/CDC25A/AURKA/ANLN/CHEK1/CDK1/KIF14/CDKN3/DTL/UBE2C/CLSPN/TRIP13/IQGAP3/CENPF/CENPE/CCNF/UBE2S/STIL/E2F1/BRCA1/FBXO5/BLM/CCNE1/DBF4/CDK2/EZH2/DBF4B/CKS1B/E2F7/CDC7/MASTL/SPDL1/ZWILCH/EIF4EBP1/POLE/CKS2/RRM1/TOPBP1	61
BP	GO:0007346	regulation of mitotic cell cycle	56/260	478/18800	7.79724e-36	1.30105e-33	1.01589e-33	CDCA5/GTSE1/PKMYT1/ESPL1/BUB1B/NEK2/AURKB/RRM2/CDC6/DLGAP5/BUB1/ZWINT/NDC80/CDT1/ORC1/CCNB1/MKI67/CDC25C/MAD2L1/TTK/TICRR/CDC25A/AURKA/ANLN/CHEK1/CDCA2/CDK1/KIF14/DTL/UBE2C/CLSPN/TRIP13/CENPF/CENPE/EME1/STIL/E2F1/BRCA1/FBXO5/BLM/CDK2/EZH2/DBF4B/CKS1B/KIF20B/E2F7/CDC7/FANCD2/WDR62/SPDL1/ZWILCH/EIF4EBP1/BORA/CKS2/RRM1/TOPBP1	56
BP	GO:1901987	regulation of cell cycle phase transition	53/260	415/18800	8.14426e-36	1.30105e-33	1.01589e-33	CDCA5/GTSE1/ESPL1/BUB1B/CDC45/AURKB/RRM2/CDC6/DLGAP5/BUB1/ZWINT/NDC80/CDT1/ORC1/CCNB1/CDC25C/MAD2L1/TTK/TICRR/CDC25A/AURKA/ANLN/CHEK1/CDK1/KIF14/DTL/FAM83D/UBE2C/CLSPN/TRIP13/CENPF/CENPE/EME1/TIMELESS/STIL/E2F1/BRCA1/FBXO5/BLM/H2AX/DBF4/CDK2/WDR76/EZH2/DBF4B/E2F7/CDC7/FANCD2/SPDL1/ZWILCH/BRIP1/RRM1/TOPBP1	53
BP	GO:0051321	meiotic cell cycle	43/260	266/18800	1.99552e-33	2.94263e-31	2.29768e-31	CDC20/NCAPH/PKMYT1/ESPL1/CCNB2/BUB1B/NEK2/EXO1/RAD51/BUB1/NDC80/RAD54L/CDC25C/TOP2A/TTK/NUF2/CDC25A/AURKA/SGO1/INCENP/RAD51AP1/TRIP13/EME1/NCAPD2/ASPM/SGO2/FBXO5/FANCA/CCNE1/XRCC2/H2AX/KIF18A/CDK2/PSMC3IP/PTTG1/TUBG1/FANCD2/MASTL/BRIP1/NDC1/SMC2/NCAPD3/CKS2	43
BP	GO:0007051	spindle organization	37/260	188/18800	4.43901e-32	6.07827e-30	4.74606e-30	TPX2/CDC20/KIF4A/KIFC1/ESPL1/MYBL2/CCNB2/KIF23/NEK2/SPAG5/AURKB/DLGAP5/KIF11/NDC80/RACGAP1/CCNB1/TACC3/SPC25/TTK/NUF2/AURKA/AUNIP/KIF15/INCENP/CENPE/PSRC1/ASPM/STIL/FBXO5/CENPH/KNSTRN/TUBG1/WDR62/TUBB/BORA/RAN/STMN1	37
BP	GO:1901990	regulation of mitotic cell cycle phase transition	44/260	321/18800	4.89555e-31	6.25651e-29	4.88525e-29	CDCA5/GTSE1/ESPL1/BUB1B/AURKB/RRM2/CDC6/DLGAP5/BUB1/ZWINT/NDC80/CDT1/ORC1/CCNB1/CDC25C/MAD2L1/TTK/TICRR/CDC25A/AURKA/ANLN/CHEK1/CDK1/KIF14/DTL/UBE2C/CLSPN/TRIP13/CENPF/CENPE/STIL/E2F1/BRCA1/FBXO5/BLM/CDK2/EZH2/DBF4B/E2F7/CDC7/SPDL1/ZWILCH/RRM1/TOPBP1	44
BP	GO:1903046	meiotic cell cycle process	37/260	207/18800	1.81607e-30	2.17587e-28	1.69898e-28	CDC20/NCAPH/ESPL1/CCNB2/BUB1B/RAD51/BUB1/NDC80/RAD54L/CDC25C/TOP2A/TTK/NUF2/CDC25A/AURKA/SGO1/INCENP/RAD51AP1/TRIP13/EME1/NCAPD2/ASPM/SGO2/FBXO5/FANCA/CCNE1/KIF18A/PSMC3IP/PTTG1/TUBG1/FANCD2/MASTL/BRIP1/NDC1/SMC2/NCAPD3/CKS2	37
BP	GO:1902850	microtubule cytoskeleton organization involved in mitosis	33/260	151/18800	2.86937e-30	3.23564e-28	2.52647e-28	TPX2/CDC20/KIF4A/KIFC1/ESPL1/CENPA/MYBL2/KIF23/NEK2/AURKB/DLGAP5/KIF11/NDC80/RACGAP1/CCNB1/TACC3/SPC25/MAD2L1/TTK/NUF2/AURKA/KIF15/CENPE/SAPCD2/PSRC1/STIL/CENPH/TUBG1/WDR62/SPDL1/BORA/RAN/STMN1	33
BP	GO:0032392	DNA geometric change	28/260	96/18800	1.14676e-29	1.2213e-27	9.53618e-28	CDC45/RAD51/RAD54L/TOP2A/MCM4/MCM6/MCM2/DSCC1/GINS2/RFC4/MCM7/GINS1/ERCC6L/HMGA1/BLM/POLQ/GINS4/RECQL4/GINS3/HMGB2/PIF1/RFC3/MCM5/RFC5/RFC2/MCM3/BRIP1/RUVBL1	28
BP	GO:0032508	DNA duplex unwinding	27/260	90/18800	5.13749e-29	5.18345e-27	4.04737e-27	CDC45/RAD51/RAD54L/TOP2A/MCM4/MCM6/MCM2/DSCC1/GINS2/RFC4/MCM7/GINS1/ERCC6L/HMGA1/BLM/POLQ/GINS4/RECQL4/GINS3/PIF1/RFC3/MCM5/RFC5/RFC2/MCM3/BRIP1/RUVBL1	27
BP	GO:0033044	regulation of chromosome organization	36/260	212/18800	7.79739e-29	7.25564e-27	5.66539e-27	CDCA5/NCAPH/ESPL1/BUB1B/NEK2/NCAPG/AURKB/CDC6/DLGAP5/BUB1/ZWINT/NDC80/CDT1/CCNB1/TACC3/FEN1/TOP2A/MAD2L1/TTK/UBE2C/TRIP13/CENPF/CENPE/NCAPD2/MCM2/FBXO5/CDK2/PIF1/PTTG1/RMI2/SPDL1/ZWILCH/DKC1/CCT5/SMC2/RUVBL1	36
BP	GO:0010948	negative regulation of cell cycle process	41/260	301/18800	7.94828e-29	7.25564e-27	5.66539e-27	GTSE1/ESPL1/BUB1B/NEK2/CDC45/AURKB/CDC6/BUB1/ZWINT/NDC80/CDT1/ORC1/CCNB1/MAD2L1/TTK/TICRR/CHEK1/CDK1/DTL/CLSPN/TRIP13/CENPF/EME1/TIMELESS/CCNF/E2F1/BRCA1/FBXO5/E2F8/BLM/H2AX/CDK2/WDR76/EZH2/E2F7/PTTG1/FANCD2/SPDL1/ZWILCH/BRIP1/TOPBP1	41
BP	GO:0071103	DNA conformation change	28/260	103/18800	1.05225e-28	9.16893e-27	7.15933e-27	CDC45/RAD51/RAD54L/TOP2A/MCM4/MCM6/MCM2/DSCC1/GINS2/RFC4/MCM7/GINS1/ERCC6L/HMGA1/BLM/POLQ/GINS4/RECQL4/GINS3/HMGB2/PIF1/RFC3/MCM5/RFC5/RFC2/MCM3/BRIP1/RUVBL1	28
BP	GO:0000075	cell cycle checkpoint signaling	33/260	170/18800	1.80019e-28	1.50042e-26	1.17156e-26	GTSE1/BUB1B/CDC45/AURKB/CDC6/BUB1/ZWINT/NDC80/CDT1/ORC1/CCNB1/MAD2L1/TTK/TICRR/CHEK1/CDK1/DTL/CLSPN/TRIP13/CENPF/EME1/TIMELESS/E2F1/BRCA1/BLM/H2AX/CDK2/WDR76/FANCD2/SPDL1/ZWILCH/BRIP1/TOPBP1	33
BP	GO:0006310	DNA recombination	41/260	324/18800	1.54002e-27	1.23009e-25	9.60487e-26	CDC45/EXO1/RAD51/KPNA2/RAD54L/FEN1/TOP2A/AUNIP/CHEK1/RAD51AP1/MCM4/TRIP13/EME1/MCM6/MCM2/HROB/TIMELESS/GINS2/MCM7/BRCA1/BLM/ALYREF/POLQ/GINS4/RECQL4/XRCC2/H2AX/PARPBP/HMGB2/PIF1/PSMC3IP/UNG/MCM5/CDC7/FANCD2/RMI2/TONSL/MCM3/BRIP1/HSPD1/RUVBL1	41
BP	GO:0045787	positive regulation of cell cycle	41/260	329/18800	2.83941e-27	2.17726e-25	1.70006e-25	CDCA5/ESPL1/KIF23/SPAG5/AURKB/RRM2/CDC6/DLGAP5/NDC80/CDT1/RACGAP1/CCNB1/FEN1/CDC25C/MAD2L1/CDC25A/AURKA/CHEK1/CDK1/KIF14/DTL/FAM83D/PLK4/UBE2C/RAD51AP1/PSRC1/STIL/FBXO5/E2F8/RANBP1/ECT2/DBF4/EZH2/DBF4B/CKS1B/KIF20B/E2F7/CDC7/EIF4EBP1/CKS2/RRM1	41
BP	GO:0090068	positive regulation of cell cycle process	36/260	247/18800	2.02424e-26	1.49249e-24	1.16537e-24	CDCA5/ESPL1/KIF23/SPAG5/AURKB/RRM2/CDC6/DLGAP5/NDC80/CDT1/RACGAP1/CCNB1/FEN1/CDC25C/MAD2L1/CDC25A/AURKA/CDK1/KIF14/DTL/FAM83D/PLK4/UBE2C/RAD51AP1/STIL/FBXO5/E2F8/RANBP1/ECT2/DBF4/EZH2/DBF4B/KIF20B/E2F7/CDC7/RRM1	36
BP	GO:0007052	mitotic spindle organization	28/260	124/18800	3.10912e-26	2.20748e-24	1.72365e-24	TPX2/CDC20/KIF4A/KIFC1/MYBL2/KIF23/NEK2/AURKB/DLGAP5/KIF11/NDC80/RACGAP1/CCNB1/TACC3/SPC25/TTK/NUF2/AURKA/KIF15/CENPE/PSRC1/STIL/CENPH/TUBG1/WDR62/BORA/RAN/STMN1	28
BP	GO:0090329	regulation of DNA-templated DNA replication	21/260	52/18800	5.25126e-26	3.59524e-24	2.80725e-24	CDT1/TICRR/TIMELESS/DSCC1/GINS2/RFC4/GINS1/FBXO5/E2F8/BLM/GINS4/GINS3/DBF4/CDK2/DBF4B/RFC3/E2F7/CDC7/RFC5/PCNA/RFC2	21
BP	GO:1901988	negative regulation of cell cycle phase transition	36/260	255/18800	6.33974e-26	4.19079e-24	3.27227e-24	GTSE1/BUB1B/CDC45/AURKB/CDC6/BUB1/ZWINT/NDC80/CDT1/ORC1/CCNB1/MAD2L1/TTK/TICRR/CHEK1/CDK1/DTL/CLSPN/TRIP13/CENPF/EME1/TIMELESS/E2F1/BRCA1/FBXO5/BLM/H2AX/CDK2/WDR76/EZH2/E2F7/FANCD2/SPDL1/ZWILCH/BRIP1/TOPBP1	36
BP	GO:0051983	regulation of chromosome segregation	25/260	91/18800	7.35709e-26	4.70118e-24	3.6708e-24	KIF2C/ESPL1/BUB1B/AURKB/CDC6/DLGAP5/BUB1/ZWINT/NDC80/CDT1/CCNB1/TACC3/MKI67/MAD2L1/TTK/CDCA2/UBE2C/TRIP13/CENPF/CENPE/FBXO5/PTTG1/RMI2/SPDL1/ZWILCH	25
BP	GO:0140013	meiotic nuclear division	32/260	188/18800	9.664e-26	5.97609e-24	4.66628e-24	CDC20/NCAPH/ESPL1/CCNB2/BUB1B/RAD51/BUB1/NDC80/RAD54L/TOP2A/TTK/NUF2/AURKA/SGO1/INCENP/RAD51AP1/TRIP13/EME1/ASPM/SGO2/FBXO5/FANCA/CCNE1/KIF18A/PSMC3IP/PTTG1/FANCD2/MASTL/BRIP1/NDC1/SMC2/CKS2	32
BP	GO:0045786	negative regulation of cell cycle	42/260	387/18800	1.66736e-25	9.98852e-24	7.79929e-24	GTSE1/ESPL1/BUB1B/NEK2/CDC45/AURKB/CDC6/BUB1/ZWINT/NDC80/CDT1/ORC1/CCNB1/MAD2L1/TTK/TICRR/CHEK1/CDK1/DTL/CLSPN/TRIP13/CENPF/EME1/TIMELESS/CCNF/E2F1/BRCA1/FBXO5/E2F8/BLM/H2AX/CDK2/WDR76/SUV39H1/EZH2/E2F7/PTTG1/FANCD2/SPDL1/ZWILCH/BRIP1/TOPBP1	42
BP	GO:0044839	cell cycle G2/M phase transition	29/260	155/18800	1.23249e-24	7.15965e-23	5.59044e-23	FOXM1/PKMYT1/CCNA2/CCNB2/AURKB/CDC6/NDC80/ORC1/CCNB1/MELK/CDC25C/TICRR/CDC25A/AURKA/CHEK1/CDK1/KIF14/DTL/CLSPN/CENPF/BRCA1/FBXO5/BLM/CDK2/DBF4B/CDC7/MASTL/RRM1/TOPBP1	29
BP	GO:0007093	mitotic cell cycle checkpoint signaling	27/260	130/18800	2.76188e-24	1.55721e-22	1.21591e-22	GTSE1/BUB1B/AURKB/CDC6/BUB1/ZWINT/NDC80/CDT1/ORC1/CCNB1/MAD2L1/TTK/TICRR/CHEK1/CDK1/DTL/CLSPN/TRIP13/CENPF/EME1/BRCA1/BLM/CDK2/FANCD2/SPDL1/ZWILCH/TOPBP1	27
BP	GO:0033045	regulation of sister chromatid segregation	22/260	72/18800	4.9481e-24	2.64481e-22	2.06514e-22	ESPL1/BUB1B/AURKB/CDC6/DLGAP5/BUB1/ZWINT/NDC80/CDT1/CCNB1/TACC3/MAD2L1/TTK/UBE2C/TRIP13/CENPF/CENPE/FBXO5/PTTG1/RMI2/SPDL1/ZWILCH	22
BP	GO:0006270	DNA replication initiation	18/260	38/18800	4.96679e-24	2.64481e-22	2.06514e-22	CDC45/CDC6/MCM10/CDT1/ORC1/TICRR/MCM4/ORC6/MCM6/MCM2/MCM7/CCNE1/GINS3/CDK2/MCM5/PRIM1/MCM3/TOPBP1	18
BP	GO:0051052	regulation of DNA metabolic process	44/260	472/18800	5.56712e-24	2.88437e-22	2.25219e-22	FOXM1/CCNA2/NEK2/AURKB/CDC6/RAD51/CDT1/KPNA2/TICRR/AUNIP/CHEK1/CDK1/RAD51AP1/TIMELESS/DSCC1/GINS2/RFC4/ESCO2/BRCA1/GINS1/FBXO5/E2F8/BLM/ALYREF/POLQ/GINS4/GINS3/H2AX/DBF4/CDK2/PARPBP/DBF4B/PIF1/MIS18A/RFC3/E2F7/CDC7/RFC5/PCNA/RMI2/RFC2/DKC1/CCT5/RUVBL1	44
BP	GO:0006302	double-strand break repair	35/260	273/18800	8.82024e-24	4.44958e-22	3.47434e-22	CDCA5/FOXM1/CDC45/RAD51/RAD54L/FEN1/AUNIP/CHEK1/RAD51AP1/MCM4/TRIP13/EME1/MCM6/MCM2/TIMELESS/GINS2/MCM7/ESCO2/BRCA1/BLM/POLQ/GINS4/RECQL4/XRCC2/H2AX/PARPBP/HMGB2/MCM5/CDC7/FANCD2/RMI2/TONSL/MCM3/BRIP1/RUVBL1	35
BP	GO:0051304	chromosome separation	24/260	97/18800	1.16194e-23	5.71139e-22	4.4596e-22	NCAPH/ESPL1/BUB1B/AURKB/CDC6/DLGAP5/BUB1/ZWINT/NDC80/CDT1/CCNB1/TACC3/TOP2A/MAD2L1/TTK/UBE2C/TRIP13/CENPF/CENPE/EME1/FBXO5/PTTG1/SPDL1/ZWILCH	24
BP	GO:0006268	DNA unwinding involved in DNA replication	15/260	22/18800	1.35006e-23	6.47015e-22	5.05205e-22	CDC45/RAD51/MCM4/MCM6/MCM2/GINS2/MCM7/GINS1/HMGA1/BLM/GINS4/RECQL4/GINS3/MCM5/MCM3	15
BP	GO:0010965	regulation of mitotic sister chromatid separation	21/260	65/18800	1.41676e-23	6.62421e-22	5.17235e-22	ESPL1/BUB1B/AURKB/CDC6/DLGAP5/BUB1/ZWINT/NDC80/CDT1/CCNB1/TACC3/MAD2L1/TTK/UBE2C/TRIP13/CENPF/CENPE/FBXO5/PTTG1/SPDL1/ZWILCH	21
BP	GO:0007088	regulation of mitotic nuclear division	25/260	111/18800	1.69087e-23	7.71762e-22	6.02612e-22	PKMYT1/ESPL1/BUB1B/NEK2/AURKB/DLGAP5/BUB1/ZWINT/NDC80/CDT1/CCNB1/MKI67/CDC25C/MAD2L1/TTK/AURKA/CHEK1/CDCA2/TRIP13/CENPF/FBXO5/KIF20B/SPDL1/ZWILCH/BORA	25
BP	GO:0051783	regulation of nuclear division	27/260	139/18800	1.84738e-23	8.23589e-22	6.43079e-22	CDC20/PKMYT1/ESPL1/BUB1B/NEK2/AURKB/DLGAP5/BUB1/ZWINT/NDC80/CDT1/CCNB1/MKI67/CDC25C/MAD2L1/TTK/AURKA/CHEK1/CDCA2/RAD51AP1/TRIP13/CENPF/FBXO5/KIF20B/SPDL1/ZWILCH/BORA	27
BP	GO:0000086	G2/M transition of mitotic cell cycle	27/260	140/18800	2.26129e-23	9.85204e-22	7.69272e-22	FOXM1/PKMYT1/CCNA2/AURKB/CDC6/ORC1/CCNB1/MELK/CDC25C/TICRR/CDC25A/AURKA/CHEK1/CDK1/KIF14/DTL/CLSPN/CENPF/BRCA1/FBXO5/BLM/CDK2/DBF4B/CDC7/MASTL/RRM1/TOPBP1	27
BP	GO:0051306	mitotic sister chromatid separation	21/260	68/18800	4.22097e-23	1.79813e-21	1.40403e-21	ESPL1/BUB1B/AURKB/CDC6/DLGAP5/BUB1/ZWINT/NDC80/CDT1/CCNB1/TACC3/MAD2L1/TTK/UBE2C/TRIP13/CENPF/CENPE/FBXO5/PTTG1/SPDL1/ZWILCH	21
BP	GO:0006275	regulation of DNA replication	26/260	131/18800	6.98099e-23	2.90925e-21	2.27162e-21	CCNA2/CDC6/CDT1/TICRR/CDK1/TIMELESS/DSCC1/GINS2/RFC4/ESCO2/GINS1/FBXO5/E2F8/BLM/GINS4/GINS3/DBF4/CDK2/DBF4B/RFC3/E2F7/CDC7/RFC5/PCNA/RFC2/RUVBL1	26
BP	GO:0044786	cell cycle DNA replication	18/260	43/18800	8.46257e-23	3.45165e-21	2.69513e-21	CDC45/RAD51/CDT1/FEN1/MCM4/MCM6/MCM2/GINS1/FBXO5/E2F8/BLM/GINS3/DBF4/DBF4B/E2F7/CDC7/PCNA/MCM3	18
BP	GO:0000725	recombinational repair	28/260	164/18800	1.13548e-22	4.53484e-21	3.54092e-21	CDC45/RAD51/RAD54L/FEN1/AUNIP/CHEK1/RAD51AP1/MCM4/MCM6/MCM2/HROB/TIMELESS/GINS2/MCM7/BRCA1/BLM/POLQ/GINS4/RECQL4/XRCC2/H2AX/PARPBP/MCM5/CDC7/RMI2/TONSL/MCM3/RUVBL1	28
BP	GO:1905818	regulation of chromosome separation	21/260	72/18800	1.65468e-22	6.47351e-21	5.05468e-21	ESPL1/BUB1B/AURKB/CDC6/DLGAP5/BUB1/ZWINT/NDC80/CDT1/CCNB1/TACC3/MAD2L1/TTK/UBE2C/TRIP13/CENPF/CENPE/FBXO5/PTTG1/SPDL1/ZWILCH	21
BP	GO:0007091	metaphase/anaphase transition of mitotic cell cycle	20/260	62/18800	1.72072e-22	6.59725e-21	5.1513e-21	ESPL1/BUB1B/AURKB/CDC6/DLGAP5/BUB1/ZWINT/NDC80/CDT1/CCNB1/TACC3/MAD2L1/TTK/UBE2C/TRIP13/CENPF/CENPE/FBXO5/SPDL1/ZWILCH	20
BP	GO:0044784	metaphase/anaphase transition of cell cycle	20/260	65/18800	5.10553e-22	1.91908e-20	1.49847e-20	ESPL1/BUB1B/AURKB/CDC6/DLGAP5/BUB1/ZWINT/NDC80/CDT1/CCNB1/TACC3/MAD2L1/TTK/UBE2C/TRIP13/CENPF/CENPE/FBXO5/SPDL1/ZWILCH	20
BP	GO:0000724	double-strand break repair via homologous recombination	27/260	162/18800	1.31283e-21	4.83981e-20	3.77905e-20	CDC45/RAD51/RAD54L/FEN1/AUNIP/CHEK1/RAD51AP1/MCM4/MCM6/MCM2/TIMELESS/GINS2/MCM7/BRCA1/BLM/POLQ/GINS4/RECQL4/XRCC2/H2AX/PARPBP/MCM5/CDC7/RMI2/TONSL/MCM3/RUVBL1	27
BP	GO:1901991	negative regulation of mitotic cell cycle phase transition	28/260	183/18800	2.54129e-21	9.1918e-20	7.17719e-20	GTSE1/BUB1B/AURKB/CDC6/BUB1/ZWINT/NDC80/CDT1/ORC1/CCNB1/MAD2L1/TTK/TICRR/CHEK1/CDK1/DTL/CLSPN/TRIP13/CENPF/BRCA1/FBXO5/BLM/CDK2/EZH2/E2F7/SPDL1/ZWILCH/TOPBP1	28
BP	GO:0030071	regulation of mitotic metaphase/anaphase transition	19/260	60/18800	3.0127e-21	1.06951e-19	8.35098e-20	ESPL1/BUB1B/AURKB/CDC6/DLGAP5/BUB1/ZWINT/NDC80/CDT1/CCNB1/MAD2L1/TTK/UBE2C/TRIP13/CENPF/CENPE/FBXO5/SPDL1/ZWILCH	19
BP	GO:0010389	regulation of G2/M transition of mitotic cell cycle	22/260	97/18800	7.02091e-21	2.44711e-19	1.91076e-19	AURKB/CDC6/ORC1/CCNB1/CDC25C/TICRR/CDC25A/AURKA/CHEK1/CDK1/KIF14/DTL/CLSPN/CENPF/BRCA1/FBXO5/BLM/CDK2/DBF4B/CDC7/RRM1/TOPBP1	22
BP	GO:1902099	regulation of metaphase/anaphase transition of cell cycle	19/260	63/18800	8.7067e-21	2.98049e-19	2.32724e-19	ESPL1/BUB1B/AURKB/CDC6/DLGAP5/BUB1/ZWINT/NDC80/CDT1/CCNB1/MAD2L1/TTK/UBE2C/TRIP13/CENPF/CENPE/FBXO5/SPDL1/ZWILCH	19
BP	GO:0008608	attachment of spindle microtubules to kinetochore	16/260	37/18800	1.11905e-20	3.76354e-19	2.93867e-19	KIF2C/NEK2/SPAG5/AURKB/NDC80/CDT1/RACGAP1/CCNB1/SPC25/NUF2/SPC24/SGO1/CENPE/KNL1/ECT2/KNSTRN	16
BP	GO:0045930	negative regulation of mitotic cell cycle	30/260	234/18800	1.68635e-20	5.54733e-19	4.3315e-19	GTSE1/BUB1B/AURKB/CDC6/BUB1/ZWINT/NDC80/CDT1/ORC1/CCNB1/MAD2L1/TTK/TICRR/CHEK1/CDK1/DTL/CLSPN/TRIP13/CENPF/EME1/BRCA1/FBXO5/BLM/CDK2/EZH2/E2F7/FANCD2/SPDL1/ZWILCH/TOPBP1	30
BP	GO:0051310	metaphase plate congression	19/260	65/18800	1.70732e-20	5.54733e-19	4.3315e-19	CDCA5/KIF2C/CDCA8/KIFC1/SPAG5/AURKB/NDC80/CDT1/CCNB1/NUF2/KIF14/FAM83D/INCENP/CENPF/CENPE/PSRC1/KIF22/KIF18A/SPDL1	19
BP	GO:0051303	establishment of chromosome localization	20/260	81/18800	6.95089e-20	2.22081e-18	1.73406e-18	CDCA5/KIF2C/CDCA8/KIFC1/SPAG5/AURKB/DLGAP5/NDC80/CDT1/CCNB1/NUF2/KIF14/FAM83D/INCENP/CENPF/CENPE/PSRC1/KIF22/KIF18A/SPDL1	20
BP	GO:1902749	regulation of cell cycle G2/M phase transition	22/260	108/18800	8.65494e-20	2.71992e-18	2.12378e-18	AURKB/CDC6/ORC1/CCNB1/CDC25C/TICRR/CDC25A/AURKA/CHEK1/CDK1/KIF14/DTL/CLSPN/CENPF/BRCA1/FBXO5/BLM/CDK2/DBF4B/CDC7/RRM1/TOPBP1	22
BP	GO:0050000	chromosome localization	20/260	83/18800	1.18181e-19	3.65409e-18	2.85321e-18	CDCA5/KIF2C/CDCA8/KIFC1/SPAG5/AURKB/DLGAP5/NDC80/CDT1/CCNB1/NUF2/KIF14/FAM83D/INCENP/CENPF/CENPE/PSRC1/KIF22/KIF18A/SPDL1	20
BP	GO:0033260	nuclear DNA replication	15/260	38/18800	1.0059e-18	3.0608e-17	2.38995e-17	CDC45/RAD51/CDT1/FEN1/MCM4/MCM6/MCM2/GINS1/BLM/GINS3/DBF4/DBF4B/CDC7/PCNA/MCM3	15
BP	GO:0140694	non-membrane-bounded organelle assembly	34/260	379/18800	3.85083e-18	1.15344e-16	9.00637e-17	TPX2/CDC20/KIF4A/KIFC1/CENPA/MYBL2/CCNB2/KIF23/NEK2/SPAG5/AURKB/DLGAP5/KIF11/NDC80/RACGAP1/AURKA/ANLN/KIF15/PLK4/INCENP/CENPF/CENPW/CENPE/ASPM/CENPN/STIL/BRCA1/FBXO5/CDK2/CENPH/WDR62/TUBB/CENPK/DHX37	34
BP	GO:0051054	positive regulation of DNA metabolic process	29/260	263/18800	5.04947e-18	1.4892e-16	1.16281e-16	FOXM1/NEK2/AURKB/RAD51/CDT1/CDK1/RAD51AP1/TIMELESS/DSCC1/GINS2/RFC4/BRCA1/GINS1/E2F8/GINS4/GINS3/H2AX/DBF4/CDK2/DBF4B/RFC3/E2F7/CDC7/RFC5/PCNA/RFC2/DKC1/CCT5/RUVBL1	29
BP	GO:0033046	negative regulation of sister chromatid segregation	15/260	43/18800	9.26443e-18	2.61175e-16	2.03932e-16	BUB1B/AURKB/BUB1/ZWINT/NDC80/CDT1/CCNB1/MAD2L1/TTK/TRIP13/CENPF/FBXO5/PTTG1/SPDL1/ZWILCH	15
BP	GO:0033048	negative regulation of mitotic sister chromatid segregation	15/260	43/18800	9.26443e-18	2.61175e-16	2.03932e-16	BUB1B/AURKB/BUB1/ZWINT/NDC80/CDT1/CCNB1/MAD2L1/TTK/TRIP13/CENPF/FBXO5/PTTG1/SPDL1/ZWILCH	15
BP	GO:2000816	negative regulation of mitotic sister chromatid separation	15/260	43/18800	9.26443e-18	2.61175e-16	2.03932e-16	BUB1B/AURKB/BUB1/ZWINT/NDC80/CDT1/CCNB1/MAD2L1/TTK/TRIP13/CENPF/FBXO5/PTTG1/SPDL1/ZWILCH	15
BP	GO:2001251	negative regulation of chromosome organization	19/260	89/18800	1.16912e-17	3.24813e-16	2.53622e-16	ESPL1/BUB1B/AURKB/BUB1/ZWINT/NDC80/CDT1/CCNB1/TOP2A/MAD2L1/TTK/TRIP13/CENPF/MCM2/FBXO5/PIF1/PTTG1/SPDL1/ZWILCH	19
BP	GO:0000727	double-strand break repair via break-induced replication	10/260	12/18800	1.38698e-17	3.79834e-16	2.96584e-16	CDC45/MCM4/MCM6/MCM2/GINS2/MCM7/GINS4/MCM5/CDC7/MCM3	10
BP	GO:0061982	meiosis I cell cycle process	22/260	136/18800	1.61687e-17	4.36555e-16	3.40873e-16	ESPL1/CCNB2/RAD51/NDC80/RAD54L/CDC25C/TOP2A/CDC25A/AURKA/SGO1/RAD51AP1/TRIP13/EME1/SGO2/FBXO5/CCNE1/PSMC3IP/PTTG1/FANCD2/BRIP1/NDC1/CKS2	22
BP	GO:0051985	negative regulation of chromosome segregation	15/260	45/18800	2.05721e-17	5.40229e-16	4.21824e-16	BUB1B/AURKB/BUB1/ZWINT/NDC80/CDT1/CCNB1/MAD2L1/TTK/TRIP13/CENPF/FBXO5/PTTG1/SPDL1/ZWILCH	15
BP	GO:1905819	negative regulation of chromosome separation	15/260	45/18800	2.05721e-17	5.40229e-16	4.21824e-16	BUB1B/AURKB/BUB1/ZWINT/NDC80/CDT1/CCNB1/MAD2L1/TTK/TRIP13/CENPF/FBXO5/PTTG1/SPDL1/ZWILCH	15
BP	GO:0071897	DNA biosynthetic process	25/260	194/18800	2.63736e-17	6.8322e-16	5.33475e-16	NEK2/AURKB/CHEK1/DTL/CENPF/TK1/HROB/DSCC1/GINS2/RFC4/GINS1/POLQ/GINS4/TYMS/GINS3/PIF1/RFC3/PCLAF/RFC5/PCNA/RFC2/POLE2/DKC1/CCT5/POLE	25
BP	GO:0031570	DNA integrity checkpoint signaling	21/260	123/18800	2.83565e-17	7.24793e-16	5.65937e-16	GTSE1/CDC45/CDC6/CDT1/ORC1/TICRR/CHEK1/CDK1/DTL/CLSPN/EME1/TIMELESS/E2F1/BRCA1/BLM/H2AX/CDK2/WDR76/FANCD2/BRIP1/TOPBP1	21
BP	GO:0033047	regulation of mitotic sister chromatid segregation	15/260	46/18800	3.01531e-17	7.60572e-16	5.93874e-16	BUB1B/AURKB/BUB1/ZWINT/NDC80/CDT1/CCNB1/MAD2L1/TTK/TRIP13/CENPF/FBXO5/PTTG1/SPDL1/ZWILCH	15
BP	GO:0051383	kinetochore organization	12/260	23/18800	4.48588e-17	1.11681e-15	8.72033e-16	CENPA/DLGAP5/NDC80/CDT1/NUF2/CENPF/CENPW/CENPE/CENPN/CENPH/CENPK/SMC2	12
BP	GO:1900262	regulation of DNA-directed DNA polymerase activity	10/260	13/18800	5.93756e-17	1.4408e-15	1.12501e-15	DSCC1/GINS2/RFC4/GINS1/GINS4/GINS3/RFC3/RFC5/PCNA/RFC2	10
BP	GO:1900264	positive regulation of DNA-directed DNA polymerase activity	10/260	13/18800	5.93756e-17	1.4408e-15	1.12501e-15	DSCC1/GINS2/RFC4/GINS1/GINS4/GINS3/RFC3/RFC5/PCNA/RFC2	10
BP	GO:0045839	negative regulation of mitotic nuclear division	15/260	48/18800	6.28523e-17	1.5061e-15	1.176e-15	BUB1B/AURKB/BUB1/ZWINT/NDC80/CDT1/CCNB1/MAD2L1/TTK/CHEK1/TRIP13/CENPF/FBXO5/SPDL1/ZWILCH	15
BP	GO:0034508	centromere complex assembly	13/260	31/18800	8.28638e-17	1.96111e-15	1.53128e-15	HJURP/CENPA/DLGAP5/CENPF/CENPW/CENPE/CENPI/CENPN/CENPO/CENPH/MIS18A/OIP5/CENPK	13
BP	GO:0045841	negative regulation of mitotic metaphase/anaphase transition	14/260	40/18800	1.11068e-16	2.59655e-15	2.02745e-15	BUB1B/AURKB/BUB1/ZWINT/NDC80/CDT1/CCNB1/MAD2L1/TTK/TRIP13/CENPF/FBXO5/SPDL1/ZWILCH	14
BP	GO:0007080	mitotic metaphase plate congression	15/260	51/18800	1.76676e-16	4.08059e-15	3.18623e-15	CDCA5/KIF2C/CDCA8/KIFC1/AURKB/NDC80/CDT1/CCNB1/NUF2/KIF14/CENPE/PSRC1/KIF22/KIF18A/SPDL1	15
BP	GO:1902100	negative regulation of metaphase/anaphase transition of cell cycle	14/260	42/18800	2.46843e-16	5.6333e-15	4.39863e-15	BUB1B/AURKB/BUB1/ZWINT/NDC80/CDT1/CCNB1/MAD2L1/TTK/TRIP13/CENPF/FBXO5/SPDL1/ZWILCH	14
BP	GO:0051784	negative regulation of nuclear division	15/260	55/18800	6.27672e-16	1.41558e-14	1.10532e-14	BUB1B/AURKB/BUB1/ZWINT/NDC80/CDT1/CCNB1/MAD2L1/TTK/CHEK1/TRIP13/CENPF/FBXO5/SPDL1/ZWILCH	15
BP	GO:0045132	meiotic chromosome segregation	18/260	96/18800	9.91858e-16	2.21092e-14	1.72634e-14	NCAPH/ESPL1/BUB1B/BUB1/TOP2A/TTK/NUF2/SGO1/TRIP13/EME1/SGO2/CCNE1/PSMC3IP/PTTG1/FANCD2/BRIP1/NDC1/SMC2	18
BP	GO:0007127	meiosis I	20/260	130/18800	1.35843e-15	2.99324e-14	2.3372e-14	ESPL1/CCNB2/RAD51/NDC80/RAD54L/TOP2A/AURKA/SGO1/RAD51AP1/TRIP13/EME1/SGO2/FBXO5/CCNE1/PSMC3IP/PTTG1/FANCD2/BRIP1/NDC1/CKS2	20
BP	GO:0007094	mitotic spindle assembly checkpoint signaling	13/260	38/18800	1.99631e-15	4.25214e-14	3.32018e-14	BUB1B/AURKB/BUB1/ZWINT/NDC80/CDT1/CCNB1/MAD2L1/TTK/TRIP13/CENPF/SPDL1/ZWILCH	13
BP	GO:0071173	spindle assembly checkpoint signaling	13/260	38/18800	1.99631e-15	4.25214e-14	3.32018e-14	BUB1B/AURKB/BUB1/ZWINT/NDC80/CDT1/CCNB1/MAD2L1/TTK/TRIP13/CENPF/SPDL1/ZWILCH	13
BP	GO:0071174	mitotic spindle checkpoint signaling	13/260	38/18800	1.99631e-15	4.25214e-14	3.32018e-14	BUB1B/AURKB/BUB1/ZWINT/NDC80/CDT1/CCNB1/MAD2L1/TTK/TRIP13/CENPF/SPDL1/ZWILCH	13
BP	GO:0031577	spindle checkpoint signaling	13/260	39/18800	2.95792e-15	6.23114e-14	4.86543e-14	BUB1B/AURKB/BUB1/ZWINT/NDC80/CDT1/CCNB1/MAD2L1/TTK/TRIP13/CENPF/SPDL1/ZWILCH	13
BP	GO:0071824	protein-DNA complex subunit organization	25/260	237/18800	3.15804e-15	6.5804e-14	5.13814e-14	HJURP/CENPA/CDC45/RAD51/DLGAP5/CDT1/ASF1B/CENPF/CENPW/CENPE/CENPI/MCM2/CHAF1A/CENPN/CENPO/HMGA1/CHAF1B/DNAJC9/H2AX/CENPH/HMGB2/MIS18A/OIP5/CENPK/SSRP1	25
BP	GO:0051225	spindle assembly	19/260	121/18800	4.82062e-15	9.9367e-14	7.75883e-14	TPX2/CDC20/KIF4A/KIFC1/MYBL2/CCNB2/KIF23/NEK2/SPAG5/AURKB/KIF11/NDC80/RACGAP1/AURKA/KIF15/INCENP/ASPM/FBXO5/TUBB	19
BP	GO:1901989	positive regulation of cell cycle phase transition	19/260	123/18800	6.58907e-15	1.34375e-13	1.04923e-13	CDCA5/ESPL1/RRM2/CDC6/DLGAP5/CDT1/CCNB1/CDC25C/CDC25A/CDK1/DTL/FAM83D/UBE2C/STIL/FBXO5/EZH2/DBF4B/CDC7/RRM1	19
BP	GO:0065004	protein-DNA complex assembly	23/260	203/18800	8.97304e-15	1.81066e-13	1.41381e-13	HJURP/CENPA/CDC45/RAD51/DLGAP5/CDT1/ASF1B/CENPF/CENPW/CENPE/CENPI/MCM2/CHAF1A/CENPN/CENPO/CHAF1B/DNAJC9/H2AX/CENPH/HMGB2/MIS18A/OIP5/CENPK	23
BP	GO:1901992	positive regulation of mitotic cell cycle phase transition	17/260	100/18800	3.50237e-14	6.99379e-13	5.46093e-13	CDCA5/ESPL1/RRM2/CDC6/DLGAP5/CDT1/CCNB1/CDC25C/CDC25A/CDK1/DTL/UBE2C/STIL/FBXO5/DBF4B/CDC7/RRM1	17
BP	GO:0070192	chromosome organization involved in meiotic cell cycle	15/260	72/18800	4.94448e-14	9.77172e-13	7.63e-13	NCAPH/BUB1B/RAD51/BUB1/SGO1/TRIP13/NCAPD2/SGO2/CCNE1/PSMC3IP/FANCD2/BRIP1/NDC1/SMC2/NCAPD3	15
BP	GO:0045931	positive regulation of mitotic cell cycle	18/260	128/18800	1.85533e-13	3.62926e-12	2.83382e-12	CDCA5/ESPL1/RRM2/CDC6/DLGAP5/CDT1/CCNB1/CDC25C/CDC25A/CDK1/DTL/UBE2C/STIL/FBXO5/DBF4B/CDC7/EIF4EBP1/RRM1	18
BP	GO:0000910	cytokinesis	20/260	174/18800	4.04204e-13	7.82686e-12	6.11141e-12	KIF4A/ESPL1/CENPA/KIF23/CEP55/AURKB/CDC6/KIF20A/RACGAP1/AURKA/ANLN/KIF14/PLK4/INCENP/E2F8/ECT2/CKAP2/KIF20B/E2F7/STMN1	20
BP	GO:0071459	protein localization to chromosome, centromeric region	10/260	25/18800	5.86454e-13	1.12423e-11	8.77829e-12	CENPA/AURKB/NDC80/CDT1/TTK/CDK1/HASPIN/KNL1/SPDL1/ZWILCH	10
BP	GO:2000573	positive regulation of DNA biosynthetic process	14/260	73/18800	1.17943e-12	2.23858e-11	1.74794e-11	NEK2/AURKB/DSCC1/GINS2/RFC4/GINS1/GINS4/GINS3/RFC3/RFC5/PCNA/RFC2/DKC1/CCT5	14
BP	GO:0034501	protein localization to kinetochore	9/260	19/18800	1.31957e-12	2.45594e-11	1.91766e-11	AURKB/NDC80/CDT1/TTK/CDK1/HASPIN/KNL1/SPDL1/ZWILCH	9
BP	GO:1903083	protein localization to condensed chromosome	9/260	19/18800	1.31957e-12	2.45594e-11	1.91766e-11	AURKB/NDC80/CDT1/TTK/CDK1/HASPIN/KNL1/SPDL1/ZWILCH	9
BP	GO:0034502	protein localization to chromosome	15/260	93/18800	2.58173e-12	4.75883e-11	3.71581e-11	CDCA5/CENPA/AURKB/NDC80/CDT1/TTK/CDK1/HASPIN/ESCO2/KNL1/EZH2/SPDL1/ZWILCH/DKC1/CCT5	15
BP	GO:1902969	mitotic DNA replication	8/260	14/18800	3.35939e-12	6.13329e-11	4.78903e-11	CDC45/RAD51/MCM4/MCM6/MCM2/GINS1/GINS3/MCM3	8
BP	GO:0010639	negative regulation of organelle organization	26/260	356/18800	4.9312e-12	8.91803e-11	6.96342e-11	TPX2/ESPL1/BUB1B/AURKB/BUB1/ZWINT/NDC80/CDT1/CCNB1/TOP2A/MAD2L1/TTK/CHEK1/TRIP13/CENPF/MCM2/CCNF/BRCA1/FBXO5/PIF1/CKAP2/PTTG1/SPDL1/ZWILCH/STMN1/PPIF	26
BP	GO:0000077	DNA damage checkpoint signaling	16/260	115/18800	4.98616e-12	8.93316e-11	6.97523e-11	GTSE1/TICRR/CHEK1/CDK1/DTL/CLSPN/EME1/E2F1/BRCA1/BLM/H2AX/CDK2/WDR76/FANCD2/BRIP1/TOPBP1	16
BP	GO:0006271	DNA strand elongation involved in DNA replication	8/260	15/18800	7.11294e-12	1.26255e-10	9.85829e-11	MCM4/RFC4/MCM7/GINS1/RFC3/PCNA/MCM3/POLE	8
BP	GO:2000278	regulation of DNA biosynthetic process	16/260	119/18800	8.52516e-12	1.49933e-10	1.17072e-10	NEK2/AURKB/CHEK1/DSCC1/GINS2/RFC4/GINS1/GINS4/GINS3/PIF1/RFC3/RFC5/PCNA/RFC2/DKC1/CCT5	16
BP	GO:0044774	mitotic DNA integrity checkpoint signaling	14/260	85/18800	1.04584e-11	1.82261e-10	1.42314e-10	GTSE1/CDC6/ORC1/TICRR/CHEK1/CDK1/DTL/CLSPN/EME1/BRCA1/BLM/CDK2/FANCD2/TOPBP1	14
BP	GO:0000281	mitotic cytokinesis	13/260	71/18800	1.42863e-11	2.46728e-10	1.92651e-10	KIF4A/ESPL1/CENPA/KIF23/CEP55/KIF20A/RACGAP1/ANLN/INCENP/ECT2/CKAP2/KIF20B/STMN1	13
BP	GO:0000076	DNA replication checkpoint signaling	8/260	17/18800	2.62348e-11	4.49037e-10	3.50619e-10	CDC45/CDC6/CDT1/ORC1/TICRR/CLSPN/TIMELESS/TOPBP1	8
BP	GO:0042770	signal transduction in response to DNA damage	18/260	174/18800	3.73176e-11	6.33077e-10	4.94323e-10	FOXM1/GTSE1/TICRR/CHEK1/CDK1/DTL/CLSPN/EME1/E2F1/BRCA1/BLM/H2AX/CDK2/WDR76/E2F7/FANCD2/BRIP1/TOPBP1	18
BP	GO:0007098	centrosome cycle	16/260	131/18800	3.78393e-11	6.36298e-10	4.96838e-10	NEK2/KIF11/NDC80/AURKA/CHEK1/CDK1/PLK4/SGO1/CCNF/STIL/BRCA1/RANBP1/XRCC2/CDK2/PCLAF/WDR62	16
BP	GO:0051382	kinetochore assembly	8/260	18/18800	4.66603e-11	7.77807e-10	6.07331e-10	CENPA/DLGAP5/CENPF/CENPW/CENPE/CENPN/CENPH/CENPK	8
BP	GO:0007062	sister chromatid cohesion	12/260	63/18800	5.42382e-11	8.96333e-10	6.99879e-10	CDCA5/CDC20/ESPL1/BUB1B/BUB1/FEN1/SGO1/DSCC1/HASPIN/ESCO2/SGO2/KIF22	12
BP	GO:0000079	regulation of cyclin-dependent protein serine/threonine kinase activity	14/260	98/18800	7.6547e-11	1.25419e-09	9.79305e-10	PKMYT1/CCNA2/CCNB2/CDC6/CCNB1/CDC25C/CDC25A/CDKN3/CCNF/PSRC1/BLM/CCNE1/CKS1B/CKS2	14
BP	GO:0010971	positive regulation of G2/M transition of mitotic cell cycle	9/260	28/18800	8.84962e-11	1.43769e-09	1.12258e-09	CCNB1/CDC25C/CDC25A/CDK1/DTL/FBXO5/DBF4B/CDC7/RRM1	9
BP	GO:0061640	cytoskeleton-dependent cytokinesis	14/260	100/18800	1.01152e-10	1.62948e-09	1.27234e-09	KIF4A/ESPL1/CENPA/KIF23/CEP55/AURKB/KIF20A/RACGAP1/ANLN/INCENP/ECT2/CKAP2/KIF20B/STMN1	14
BP	GO:1904029	regulation of cyclin-dependent protein kinase activity	14/260	101/18800	1.15995e-10	1.85302e-09	1.44688e-09	PKMYT1/CCNA2/CCNB2/CDC6/CCNB1/CDC25C/CDC25A/CDKN3/CCNF/PSRC1/BLM/CCNE1/CKS1B/CKS2	14
BP	GO:0051988	regulation of attachment of spindle microtubules to kinetochore	7/260	13/18800	1.42715e-10	2.26104e-09	1.76548e-09	NEK2/SPAG5/AURKB/RACGAP1/CCNB1/ECT2/KNSTRN	7
BP	GO:0031023	microtubule organizing center organization	16/260	145/18800	1.77922e-10	2.79571e-09	2.18296e-09	NEK2/KIF11/NDC80/AURKA/CHEK1/CDK1/PLK4/SGO1/CCNF/STIL/BRCA1/RANBP1/XRCC2/CDK2/PCLAF/WDR62	16
BP	GO:1902751	positive regulation of cell cycle G2/M phase transition	9/260	31/18800	2.49115e-10	3.88255e-09	3.03159e-09	CCNB1/CDC25C/CDC25A/CDK1/DTL/FBXO5/DBF4B/CDC7/RRM1	9
BP	GO:2000105	positive regulation of DNA-templated DNA replication	7/260	14/18800	2.82072e-10	4.36074e-09	3.40497e-09	CDT1/E2F8/DBF4/CDK2/DBF4B/E2F7/CDC7	7
BP	GO:0051656	establishment of organelle localization	25/260	404/18800	4.41202e-10	6.76628e-09	5.28328e-09	CDCA5/KIF2C/CDCA8/KIFC1/ESPL1/CENPA/SPAG5/AURKB/DLGAP5/NDC80/CDT1/CCNB1/MAD2L1/NUF2/KIF14/FAM83D/INCENP/CENPF/CENPE/SAPCD2/PSRC1/KIF22/KIF18A/SPDL1/RAN	25
BP	GO:0044843	cell cycle G1/S phase transition	20/260	255/18800	4.51708e-10	6.87242e-09	5.36616e-09	GTSE1/CCNA2/RRM2/CDC6/CDC25A/KIF14/CDKN3/FAM83D/IQGAP3/STIL/E2F1/CCNE1/DBF4/CDK2/EZH2/E2F7/CDC7/EIF4EBP1/POLE/RRM1	20
BP	GO:0007143	female meiotic nuclear division	9/260	33/18800	4.65198e-10	7.02193e-09	5.4829e-09	NCAPH/CCNB2/NDC80/TOP2A/TTK/AURKA/TRIP13/FBXO5/MASTL	9
BP	GO:0000212	meiotic spindle organization	7/260	15/18800	5.2266e-10	7.82766e-09	6.11203e-09	ESPL1/CCNB2/NDC80/AURKA/ASPM/FBXO5/TUBG1	7
BP	GO:0010972	negative regulation of G2/M transition of mitotic cell cycle	11/260	62/18800	7.81193e-10	1.16089e-08	9.06452e-09	AURKB/CDC6/ORC1/TICRR/CHEK1/CDK1/DTL/CLSPN/BRCA1/BLM/TOPBP1	11
BP	GO:0044818	mitotic G2/M transition checkpoint	10/260	48/18800	8.87359e-10	1.30851e-08	1.02172e-08	CDC6/ORC1/TICRR/CHEK1/CDK1/DTL/CLSPN/BRCA1/BLM/TOPBP1	10
BP	GO:1902750	negative regulation of cell cycle G2/M phase transition	11/260	64/18800	1.11534e-09	1.63214e-08	1.27441e-08	AURKB/CDC6/ORC1/TICRR/CHEK1/CDK1/DTL/CLSPN/BRCA1/BLM/TOPBP1	11
BP	GO:0044773	mitotic DNA damage checkpoint signaling	12/260	81/18800	1.1533e-09	1.67491e-08	1.30781e-08	GTSE1/TICRR/CHEK1/CDK1/DTL/CLSPN/EME1/BRCA1/BLM/CDK2/FANCD2/TOPBP1	12
BP	GO:0022616	DNA strand elongation	9/260	37/18800	1.42983e-09	2.0609e-08	1.6092e-08	MCM4/RFC4/MCM7/GINS1/RFC3/PCNA/MCM3/POLE/RUVBL1	9
BP	GO:0000082	G1/S transition of mitotic cell cycle	18/260	225/18800	2.51638e-09	3.59993e-08	2.81092e-08	GTSE1/RRM2/CDC6/CDC25A/KIF14/CDKN3/IQGAP3/STIL/E2F1/CCNE1/DBF4/CDK2/EZH2/E2F7/CDC7/EIF4EBP1/POLE/RRM1	18
BP	GO:0090307	mitotic spindle assembly	11/260	69/18800	2.57376e-09	3.65475e-08	2.85372e-08	TPX2/CDC20/KIF4A/KIFC1/MYBL2/KIF23/NEK2/AURKB/KIF11/RACGAP1/KIF15	11
BP	GO:0045740	positive regulation of DNA replication	9/260	40/18800	3.03104e-09	4.27242e-08	3.33602e-08	CDT1/CDK1/E2F8/DBF4/CDK2/DBF4B/E2F7/CDC7/PCNA	9
BP	GO:0032465	regulation of cytokinesis	12/260	91/18800	4.5525e-09	6.37017e-08	4.97399e-08	KIF23/AURKB/CDC6/KIF20A/RACGAP1/AURKA/KIF14/PLK4/E2F8/ECT2/KIF20B/E2F7	12
BP	GO:0051302	regulation of cell division	16/260	186/18800	7.01583e-09	9.7459e-08	7.60984e-08	KIF18B/KIF23/AURKB/CDC6/KIF20A/RACGAP1/AURKA/KIF14/PLK4/ORC6/ASPM/E2F8/BLM/ECT2/KIF20B/E2F7	16
BP	GO:0016572	histone phosphorylation	9/260	45/18800	9.24805e-09	1.27543e-07	9.9589e-08	CCNA2/AURKB/AURKA/CHEK1/CDK1/INCENP/HASPIN/CDK2/VRK1	9
BP	GO:0045143	homologous chromosome segregation	10/260	65/18800	1.97586e-08	2.70552e-07	2.11254e-07	ESPL1/SGO1/TRIP13/SGO2/CCNE1/PSMC3IP/PTTG1/FANCD2/BRIP1/NDC1	10
BP	GO:0030261	chromosome condensation	9/260	49/18800	2.04308e-08	2.745e-07	2.14336e-07	CDCA5/NCAPH/NCAPG/TOP2A/CDK1/NCAPD2/NCAPG2/SMC2/NCAPD3	9
BP	GO:0045005	DNA-templated DNA replication maintenance of fidelity	9/260	49/18800	2.04308e-08	2.745e-07	2.14336e-07	RAD51/EME1/TIMELESS/TRAIP/BLM/ALYREF/PCNA/TONSL/POLE	9
BP	GO:0007095	mitotic G2 DNA damage checkpoint signaling	8/260	35/18800	2.04765e-08	2.745e-07	2.14336e-07	TICRR/CHEK1/CDK1/DTL/CLSPN/BRCA1/BLM/TOPBP1	8
BP	GO:0051315	attachment of mitotic spindle microtubules to kinetochore	6/260	15/18800	2.97785e-08	3.96426e-07	3.0954e-07	KIF2C/AURKB/NDC80/CDT1/NUF2/CENPE	6
BP	GO:2001252	positive regulation of chromosome organization	11/260	89/18800	4.03886e-08	5.33965e-07	4.16934e-07	NCAPH/NEK2/NCAPG/AURKB/CDT1/FEN1/NCAPD2/CDK2/DKC1/CCT5/SMC2	11
BP	GO:0032886	regulation of microtubule-based process	17/260	249/18800	7.35828e-08	9.66152e-07	7.54396e-07	TPX2/SKA3/SPAG5/SKA1/TACC3/AURKA/KIF15/PLK4/CCNF/PSRC1/STIL/BRCA1/KIF18A/CKAP2/WDR62/BORA/STMN1	17
BP	GO:0007131	reciprocal meiotic recombination	9/260	57/18800	8.12432e-08	1.05232e-06	8.21677e-07	RAD51/RAD54L/TOP2A/RAD51AP1/TRIP13/EME1/PSMC3IP/FANCD2/BRIP1	9
BP	GO:0140527	reciprocal homologous recombination	9/260	57/18800	8.12432e-08	1.05232e-06	8.21677e-07	RAD51/RAD54L/TOP2A/RAD51AP1/TRIP13/EME1/PSMC3IP/FANCD2/BRIP1	9
BP	GO:0051782	negative regulation of cell division	6/260	18/18800	1.06665e-07	1.37232e-06	1.07154e-06	AURKB/ORC6/ASPM/E2F8/BLM/E2F7	6
BP	GO:0035825	homologous recombination	9/260	59/18800	1.10774e-07	1.41569e-06	1.10541e-06	RAD51/RAD54L/TOP2A/RAD51AP1/TRIP13/EME1/PSMC3IP/FANCD2/BRIP1	9
BP	GO:0033314	mitotic DNA replication checkpoint signaling	5/260	10/18800	1.15939e-07	1.47189e-06	1.14929e-06	CDC6/ORC1/TICRR/CLSPN/TOPBP1	5
BP	GO:0007076	mitotic chromosome condensation	6/260	19/18800	1.54093e-07	1.94339e-06	1.51745e-06	CDCA5/NCAPH/NCAPG/NCAPD2/SMC2/NCAPD3	6
BP	GO:0006282	regulation of DNA repair	13/260	152/18800	1.99473e-07	2.49928e-06	1.9515e-06	FOXM1/RAD51/AUNIP/CHEK1/RAD51AP1/TIMELESS/BRCA1/POLQ/H2AX/PARPBP/PCNA/RMI2/RUVBL1	13
BP	GO:0007135	meiosis II	5/260	11/18800	2.10156e-07	2.59915e-06	2.02949e-06	BUB1B/BUB1/SGO1/SGO2/MASTL	5
BP	GO:0061983	meiosis II cell cycle process	5/260	11/18800	2.10156e-07	2.59915e-06	2.02949e-06	BUB1B/BUB1/SGO1/SGO2/MASTL	5
BP	GO:0000723	telomere maintenance	12/260	132/18800	3.05093e-07	3.74913e-06	2.92741e-06	NEK2/EXO1/AURKB/RAD51/FEN1/BLM/RECQL4/CCNE1/PIF1/PCNA/DKC1/CCT5	12
BP	GO:0034728	nucleosome organization	13/260	159/18800	3.36686e-07	4.111e-06	3.20997e-06	HJURP/ASF1B/CENPW/MCM2/CHAF1A/HMGA1/CHAF1B/DNAJC9/H2AX/HMGB2/MIS18A/OIP5/SSRP1	13
BP	GO:2001020	regulation of response to DNA damage stimulus	16/260	246/18800	3.46847e-07	4.20826e-06	3.28592e-06	FOXM1/RAD51/AUNIP/CHEK1/RAD51AP1/DDIAS/TIMELESS/BRCA1/FBXO5/POLQ/H2AX/WDR76/PARPBP/PCNA/RMI2/RUVBL1	16
BP	GO:0044771	meiotic cell cycle phase transition	5/260	12/18800	3.56201e-07	4.26773e-06	3.33235e-06	CCNB2/NDC80/CDC25C/TTK/CDC25A	5
BP	GO:0051255	spindle midzone assembly	5/260	12/18800	3.56201e-07	4.26773e-06	3.33235e-06	KIF4A/KIF23/AURKB/RACGAP1/INCENP	5
BP	GO:0032200	telomere organization	13/260	162/18800	4.178e-07	4.97468e-06	3.88435e-06	NEK2/EXO1/AURKB/RAD51/FEN1/BLM/RECQL4/CCNE1/EZH2/PIF1/PCNA/DKC1/CCT5	13
BP	GO:0051445	regulation of meiotic cell cycle	8/260	51/18800	4.57607e-07	5.41501e-06	4.22818e-06	CDC20/CDC25C/TTK/CDC25A/RAD51AP1/TRIP13/ASPM/FBXO5	8
BP	GO:0007144	female meiosis I	5/260	13/18800	5.72295e-07	6.73061e-06	5.25543e-06	CCNB2/NDC80/AURKA/TRIP13/FBXO5	5
BP	GO:0000731	DNA synthesis involved in DNA repair	7/260	37/18800	6.44776e-07	7.5368e-06	5.88493e-06	DTL/HROB/RFC3/PCLAF/PCNA/POLE2/POLE	7
BP	GO:1904666	regulation of ubiquitin protein ligase activity	6/260	24/18800	7.21287e-07	8.38004e-06	6.54335e-06	CDC20/MAD2L1/UBE2C/UBE2S/FBXO5/MASTL	6
BP	GO:0007100	mitotic centrosome separation	5/260	14/18800	8.80195e-07	1.01647e-05	7.93682e-06	NEK2/KIF11/AURKA/CHEK1/RANBP1	5
BP	GO:0032506	cytokinetic process	7/260	39/18800	9.40806e-07	1.07995e-05	8.43256e-06	CEP55/AURKB/KIF20A/RACGAP1/ANLN/ECT2/KIF20B	7
BP	GO:0031497	chromatin assembly	14/260	205/18800	1.06377e-06	1.21384e-05	9.47798e-06	HJURP/ASF1B/CENPW/MCM2/CHAF1A/CHAF1B/DNAJC9/H2AX/CDK2/HMGB2/SUV39H1/EZH2/MIS18A/OIP5	14
BP	GO:0031109	microtubule polymerization or depolymerization	11/260	123/18800	1.12682e-06	1.27817e-05	9.9803e-06	TPX2/KIF2C/KIF18B/SKA3/SKA1/PSRC1/FBXO5/KIF18A/CKAP2/TUBG1/STMN1	11
BP	GO:0051299	centrosome separation	5/260	15/18800	1.3054e-06	1.47203e-05	1.1494e-05	NEK2/KIF11/AURKA/CHEK1/RANBP1	5
BP	GO:0031297	replication fork processing	7/260	41/18800	1.3431e-06	1.50569e-05	1.17568e-05	RAD51/EME1/TRAIP/BLM/ALYREF/PCNA/TONSL	7
BP	GO:0006334	nucleosome assembly	11/260	126/18800	1.4323e-06	1.59635e-05	1.24647e-05	HJURP/ASF1B/CENPW/MCM2/CHAF1A/CHAF1B/DNAJC9/H2AX/HMGB2/MIS18A/OIP5	11
BP	GO:0032467	positive regulation of cytokinesis	7/260	42/18800	1.59283e-06	1.76501e-05	1.37816e-05	KIF23/AURKB/CDC6/RACGAP1/KIF14/ECT2/KIF20B	7
BP	GO:0000018	regulation of DNA recombination	11/260	131/18800	2.10477e-06	2.31887e-05	1.81064e-05	RAD51/KPNA2/CHEK1/RAD51AP1/TIMELESS/BLM/ALYREF/POLQ/PARPBP/RMI2/RUVBL1	11
BP	GO:2000779	regulation of double-strand break repair	10/260	110/18800	3.00143e-06	3.28785e-05	2.56724e-05	FOXM1/RAD51/AUNIP/CHEK1/RAD51AP1/TIMELESS/POLQ/PARPBP/RMI2/RUVBL1	10
BP	GO:0010638	positive regulation of organelle organization	21/260	487/18800	4.52934e-06	4.93337e-05	3.8521e-05	NCAPH/ESPL1/NEK2/SPAG5/NCAPG/AURKB/DLGAP5/CDT1/FEN1/AURKA/PLK4/RAD51AP1/NCAPD2/PSRC1/STIL/CDK2/PGAM5/DKC1/CCT5/SMC2/PPIF	21
BP	GO:0010212	response to ionizing radiation	11/260	142/18800	4.62643e-06	5.00318e-05	3.90661e-05	RAD51/RAD54L/TICRR/RAD51AP1/BRCA1/BLM/ECT2/XRCC2/H2AX/FANCD2/TOPBP1	11
BP	GO:0071900	regulation of protein serine/threonine kinase activity	18/260	372/18800	4.64562e-06	5.00318e-05	3.90661e-05	PKMYT1/CCNA2/CCNB2/CDC6/CCNB1/CDC25C/CDC25A/CDKN3/INCENP/CCNF/PSRC1/BLM/CCNE1/DBF4/EZH2/DBF4B/CKS1B/CKS2	18
BP	GO:0010569	regulation of double-strand break repair via homologous recombination	8/260	70/18800	5.40917e-06	5.79295e-05	4.52328e-05	RAD51/CHEK1/RAD51AP1/TIMELESS/POLQ/PARPBP/RMI2/RUVBL1	8
BP	GO:0051053	negative regulation of DNA metabolic process	11/260	148/18800	6.89412e-06	7.34224e-05	5.73301e-05	CDC6/CDT1/AUNIP/CHEK1/TIMELESS/FBXO5/BLM/POLQ/PARPBP/PIF1/RMI2	11
BP	GO:0045144	meiotic sister chromatid segregation	4/260	10/18800	7.03128e-06	7.36555e-05	5.75121e-05	BUB1B/BUB1/SGO1/SGO2	4
BP	GO:0051177	meiotic sister chromatid cohesion	4/260	10/18800	7.03128e-06	7.36555e-05	5.75121e-05	BUB1B/BUB1/SGO1/SGO2	4
BP	GO:0051231	spindle elongation	4/260	10/18800	7.03128e-06	7.36555e-05	5.75121e-05	KIF4A/KIF23/AURKB/RACGAP1	4
BP	GO:0040001	establishment of mitotic spindle localization	6/260	35/18800	7.65661e-06	7.97702e-05	6.22866e-05	ESPL1/CENPA/NDC80/MAD2L1/SAPCD2/SPDL1	6
BP	GO:0070507	regulation of microtubule cytoskeleton organization	11/260	152/18800	8.89709e-06	9.21931e-05	7.19867e-05	TPX2/SKA3/SPAG5/SKA1/TACC3/KIF15/PSRC1/KIF18A/CKAP2/BORA/STMN1	11
BP	GO:0051653	spindle localization	7/260	55/18800	1.02804e-05	0.000105955	8.27323e-05	ESPL1/CENPA/NDC80/MAD2L1/SAPCD2/ASPM/SPDL1	7
BP	GO:0031055	chromatin remodeling at centromere	4/260	11/18800	1.09291e-05	0.000110852	8.6556e-05	HJURP/CENPW/MIS18A/OIP5	4
BP	GO:0060623	regulation of chromosome condensation	4/260	11/18800	1.09291e-05	0.000110852	8.6556e-05	NCAPH/NCAPG/NCAPD2/SMC2	4
BP	GO:1904668	positive regulation of ubiquitin protein ligase activity	4/260	11/18800	1.09291e-05	0.000110852	8.6556e-05	CDC20/UBE2C/UBE2S/MASTL	4
BP	GO:0051438	regulation of ubiquitin-protein transferase activity	7/260	56/18800	1.16117e-05	0.000117156	9.14783e-05	CDC20/BUB1B/MAD2L1/UBE2C/UBE2S/FBXO5/MASTL	7
BP	GO:0009314	response to radiation	19/260	438/18800	1.20073e-05	0.000120513	9.40998e-05	AURKB/RAD51/RAD54L/FEN1/TICRR/CDC25A/CHEK1/DTL/RAD51AP1/PBK/BRCA1/BLM/ECT2/XRCC2/H2AX/PCLAF/FANCD2/PCNA/TOPBP1	19
BP	GO:0007292	female gamete generation	11/260	158/18800	1.28477e-05	0.000128276	0.000100161	NCAPH/CCNB2/NDC80/TOP2A/TTK/AURKA/TRIP13/HROB/ASPM/FBXO5/MASTL	11
BP	GO:0070601	centromeric sister chromatid cohesion	4/260	12/18800	1.62155e-05	0.000161063	0.000125762	BUB1B/BUB1/SGO1/SGO2	4
BP	GO:0051307	meiotic chromosome separation	5/260	25/18800	2.06231e-05	0.000203786	0.000159121	NCAPH/ESPL1/TOP2A/TTK/EME1	5
BP	GO:0006338	chromatin remodeling	14/260	266/18800	2.14812e-05	0.000211177	0.000164892	HJURP/ASF1B/CENPW/MCM2/CHAF1A/HMGA1/CHAF1B/DNAJC9/H2AX/HMGB2/MIS18A/OIP5/RUVBL1/SSRP1	14
BP	GO:0001833	inner cell mass cell proliferation	4/260	13/18800	2.3168e-05	0.000225447	0.000176035	CHEK1/NCAPG2/GINS1/GINS4	4
BP	GO:0033262	regulation of nuclear cell cycle DNA replication	4/260	13/18800	2.3168e-05	0.000225447	0.000176035	CDT1/DBF4/DBF4B/CDC7	4
BP	GO:0006284	base-excision repair	6/260	43/18800	2.62146e-05	0.00025253	0.000197182	FEN1/POLQ/UNG/PCNA/NEIL3/POLE	6
BP	GO:0090224	regulation of spindle organization	6/260	43/18800	2.62146e-05	0.00025253	0.000197182	TPX2/SPAG5/TACC3/KIF15/PSRC1/BORA	6
BP	GO:0051984	positive regulation of chromosome segregation	4/260	14/18800	3.20832e-05	0.000307517	0.000240117	AURKB/CDC6/CDT1/CCNB1	4
BP	GO:0007064	mitotic sister chromatid cohesion	5/260	28/18800	3.6877e-05	0.000351707	0.000274622	CDCA5/CDC20/SGO1/DSCC1/HASPIN	5
BP	GO:0007019	microtubule depolymerization	6/260	46/18800	3.89044e-05	0.000369207	0.000288286	TPX2/KIF2C/KIF18B/KIF18A/CKAP2/STMN1	6
BP	GO:2000104	negative regulation of DNA-templated DNA replication	4/260	15/18800	4.32751e-05	0.000408662	0.000319093	CDT1/TIMELESS/FBXO5/BLM	4
BP	GO:0000132	establishment of mitotic spindle orientation	5/260	30/18800	5.22775e-05	0.000491254	0.000383584	CENPA/NDC80/MAD2L1/SAPCD2/SPDL1	5
BP	GO:0009263	deoxyribonucleotide biosynthetic process	4/260	16/18800	5.70743e-05	0.000528558	0.000412711	RRM2/TYMS/DTYMK/RRM1	4
BP	GO:0009265	2'-deoxyribonucleotide biosynthetic process	4/260	16/18800	5.70743e-05	0.000528558	0.000412711	RRM2/TYMS/DTYMK/RRM1	4
BP	GO:0046385	deoxyribose phosphate biosynthetic process	4/260	16/18800	5.70743e-05	0.000528558	0.000412711	RRM2/TYMS/DTYMK/RRM1	4
BP	GO:0071478	cellular response to radiation	11/260	187/18800	6.10438e-05	0.000562601	0.000439293	AURKB/RAD51/CDC25A/CHEK1/RAD51AP1/PBK/BRCA1/BLM/ECT2/H2AX/PCNA	11
BP	GO:0045737	positive regulation of cyclin-dependent protein serine/threonine kinase activity	5/260	31/18800	6.16312e-05	0.000565297	0.000441398	CDC6/CCNB1/PSRC1/CKS1B/CKS2	5
BP	GO:0051293	establishment of spindle localization	6/260	50/18800	6.30211e-05	0.000575292	0.000449203	ESPL1/CENPA/NDC80/MAD2L1/SAPCD2/SPDL1	6
BP	GO:1902806	regulation of cell cycle G1/S phase transition	11/260	188/18800	6.40571e-05	0.000581978	0.000454424	GTSE1/RRM2/CDC6/KIF14/FAM83D/STIL/E2F1/CDK2/EZH2/E2F7/RRM1	11
BP	GO:0008156	negative regulation of DNA replication	5/260	32/18800	7.22248e-05	0.000650024	0.000507555	CDC6/CDT1/TIMELESS/FBXO5/BLM	5
BP	GO:0036297	interstrand cross-link repair	5/260	32/18800	7.22248e-05	0.000650024	0.000507555	RAD51/RAD51AP1/HROB/FANCD2/NEIL3	5
BP	GO:0051298	centrosome duplication	7/260	74/18800	7.29341e-05	0.000652191	0.000509247	NDC80/PLK4/CCNF/STIL/BRCA1/CDK2/WDR62	7
BP	GO:0090231	regulation of spindle checkpoint	4/260	17/18800	7.38265e-05	0.000652191	0.000509247	NDC80/CDT1/CCNB1/MAD2L1	4
BP	GO:0090266	regulation of mitotic cell cycle spindle assembly checkpoint	4/260	17/18800	7.38265e-05	0.000652191	0.000509247	NDC80/CDT1/CCNB1/MAD2L1	4
BP	GO:1903504	regulation of mitotic spindle checkpoint	4/260	17/18800	7.38265e-05	0.000652191	0.000509247	NDC80/CDT1/CCNB1/MAD2L1	4
BP	GO:0046605	regulation of centrosome cycle	6/260	52/18800	7.88976e-05	0.000693792	0.000541731	AURKA/PLK4/CCNF/STIL/BRCA1/WDR62	6
BP	GO:2000045	regulation of G1/S transition of mitotic cell cycle	10/260	160/18800	7.96046e-05	0.000696813	0.000544089	GTSE1/RRM2/CDC6/KIF14/STIL/E2F1/CDK2/EZH2/E2F7/RRM1	10
BP	GO:0006336	DNA replication-independent chromatin assembly	5/260	33/18800	8.41673e-05	0.000733403	0.00057266	HJURP/ASF1B/CENPW/MIS18A/OIP5	5
BP	GO:0007129	homologous chromosome pairing at meiosis	6/260	53/18800	8.7949e-05	0.000759452	0.000592999	TRIP13/CCNE1/PSMC3IP/FANCD2/BRIP1/NDC1	6
BP	GO:0072698	protein localization to microtubule cytoskeleton	6/260	53/18800	8.7949e-05	0.000759452	0.000592999	SPAG5/TTK/AURKA/FAM83D/STIL/KIF20B	6
BP	GO:0031145	anaphase-promoting complex-dependent catabolic process	4/260	18/18800	9.38912e-05	0.000807128	0.000630226	CDC20/UBE2C/UBE2S/CDK2	4
BP	GO:0006301	postreplication repair	5/260	34/18800	9.75724e-05	0.000827638	0.000646241	DTL/BRCA1/PCLAF/PCNA/POLE2	5
BP	GO:0034724	DNA replication-independent chromatin organization	5/260	34/18800	9.75724e-05	0.000827638	0.000646241	HJURP/ASF1B/CENPW/MIS18A/OIP5	5
BP	GO:1901976	regulation of cell cycle checkpoint	5/260	34/18800	9.75724e-05	0.000827638	0.000646241	NDC80/CDT1/CCNB1/MAD2L1/WDR76	5
BP	GO:1904031	positive regulation of cyclin-dependent protein kinase activity	5/260	35/18800	0.000112558	0.000950548	0.000742212	CDC6/CCNB1/PSRC1/CKS1B/CKS2	5
BP	GO:0051294	establishment of spindle orientation	5/260	36/18800	0.000129248	0.0010867	0.000848526	CENPA/NDC80/MAD2L1/SAPCD2/SPDL1	5
BP	GO:0044380	protein localization to cytoskeleton	6/260	57/18800	0.000132752	0.00111129	0.000867724	SPAG5/TTK/AURKA/FAM83D/STIL/KIF20B	6
BP	GO:2000241	regulation of reproductive process	10/260	176/18800	0.000174901	0.00145777	0.00113826	CDC20/CDC25C/TTK/CDC25A/AURKA/RAD51AP1/TRIP13/ASPM/FBXO5/DHX37	10
BP	GO:0001824	blastocyst development	8/260	113/18800	0.000175968	0.0014603	0.00114024	NEK2/RRM2/ASF1B/CHEK1/NCAPG2/GINS1/GINS4/TEAD4	8
BP	GO:0001832	blastocyst growth	4/260	21/18800	0.00017774	0.00146235	0.00114184	CHEK1/NCAPG2/GINS1/GINS4	4
BP	GO:0007063	regulation of sister chromatid cohesion	4/260	21/18800	0.00017774	0.00146235	0.00114184	CDCA5/ESPL1/BUB1/FEN1	4
BP	GO:0022412	cellular process involved in reproduction in multicellular organism	16/260	406/18800	0.000179657	0.0014718	0.00114922	NCAPH/CCNB2/NDC80/TOP2A/TTK/AURKA/TRIP13/ASPM/KNL1/FBXO5/FANCA/KIF18A/HMGB2/MASTL/BRIP1/RAN	16
BP	GO:0060236	regulation of mitotic spindle organization	5/260	39/18800	0.000190834	0.00155672	0.00121553	TPX2/TACC3/KIF15/PSRC1/BORA	5
BP	GO:0043486	histone exchange	4/260	22/18800	0.000214888	0.00173814	0.00135719	HJURP/CENPW/MIS18A/OIP5	4
BP	GO:0051444	negative regulation of ubiquitin-protein transferase activity	4/260	22/18800	0.000214888	0.00173814	0.00135719	CDC20/BUB1B/MAD2L1/FBXO5	4
BP	GO:0051781	positive regulation of cell division	7/260	89/18800	0.000234269	0.00188695	0.00147338	KIF23/AURKB/CDC6/RACGAP1/KIF14/ECT2/KIF20B	7
BP	GO:0007099	centriole replication	5/260	42/18800	0.000272595	0.00218646	0.00170724	PLK4/STIL/BRCA1/CDK2/WDR62	5
BP	GO:0031100	animal organ regeneration	6/260	65/18800	0.000275576	0.00220116	0.00171872	CCNA2/AURKA/CDK1/TYMS/EZH2/PCNA	6
BP	GO:1901993	regulation of meiotic cell cycle phase transition	3/260	10/18800	0.000292009	0.00232275	0.00181366	CDC25C/TTK/CDC25A	3
BP	GO:1902808	positive regulation of cell cycle G1/S phase transition	6/260	66/18800	0.000299667	0.00237381	0.00185353	RRM2/CDC6/FAM83D/STIL/EZH2/RRM1	6
BP	GO:0009394	2'-deoxyribonucleotide metabolic process	5/260	43/18800	0.000305013	0.00239971	0.00187375	RRM2/TYMS/DTYMK/UNG/RRM1	5
BP	GO:0019985	translesion synthesis	4/260	24/18800	0.00030544	0.00239971	0.00187375	DTL/PCLAF/PCNA/POLE2	4
BP	GO:0045739	positive regulation of DNA repair	7/260	94/18800	0.000328263	0.00256849	0.00200554	FOXM1/RAD51AP1/TIMELESS/BRCA1/H2AX/PCNA/RUVBL1	7
BP	GO:0001701	in utero embryonic development	15/260	387/18800	0.000340072	0.00264088	0.00206207	CCNB2/NEK2/RRM2/CCNB1/ASF1B/CHEK1/PLK4/NCAPG2/STIL/GINS1/E2F8/GINS4/XRCC2/E2F7/TEAD4	15
BP	GO:0009262	deoxyribonucleotide metabolic process	5/260	44/18800	0.00034027	0.00264088	0.00206207	RRM2/TYMS/DTYMK/UNG/RRM1	5
BP	GO:0019692	deoxyribose phosphate metabolic process	5/260	45/18800	0.000378526	0.00292595	0.00228465	RRM2/TYMS/DTYMK/UNG/RRM1	5
BP	GO:0035404	histone-serine phosphorylation	3/260	11/18800	0.000397414	0.00305961	0.00238902	AURKB/AURKA/VRK1	3
BP	GO:0098534	centriole assembly	5/260	46/18800	0.000419944	0.00322013	0.00251436	PLK4/STIL/BRCA1/CDK2/WDR62	5
BP	GO:0045860	positive regulation of protein kinase activity	15/260	396/18800	0.000432796	0.00330546	0.00258099	TPX2/CDC6/CCNB1/KIF14/INCENP/CLSPN/CENPE/PSRC1/ECT2/DBF4/EZH2/DBF4B/CKS1B/BORA/CKS2	15
BP	GO:0072711	cellular response to hydroxyurea	3/260	12/18800	0.000524481	0.0039898	0.00311534	RAD51/TIMELESS/BLM	3
BP	GO:0021543	pallium development	9/260	169/18800	0.000588915	0.00446226	0.00348424	TACC3/KIF14/ASPM/H2AX/EZH2/WDR62/FBXO45/RAN/SLC2A1	9
BP	GO:0071479	cellular response to ionizing radiation	6/260	75/18800	0.000598876	0.00451986	0.00352922	RAD51/RAD51AP1/BRCA1/BLM/ECT2/H2AX	6
BP	GO:0097421	liver regeneration	4/260	29/18800	0.000646656	0.00486133	0.00379585	AURKA/TYMS/EZH2/PCNA	4
BP	GO:0072710	response to hydroxyurea	3/260	13/18800	0.000674875	0.00505365	0.00394602	RAD51/TIMELESS/BLM	3
BP	GO:0010458	exit from mitosis	4/260	30/18800	0.000738099	0.00550558	0.0042989	CDCA5/ANLN/UBE2C/UBE2S	4
BP	GO:0032210	regulation of telomere maintenance via telomerase	5/260	53/18800	0.000812749	0.00603891	0.00471534	NEK2/AURKB/PIF1/DKC1/CCT5	5
BP	GO:0006287	base-excision repair, gap-filling	3/260	14/18800	0.000850181	0.00629265	0.00491346	FEN1/PCNA/POLE	3
BP	GO:0010833	telomere maintenance via telomere lengthening	6/260	81/18800	0.000901053	0.00664353	0.00518744	NEK2/AURKB/RAD51/PIF1/DKC1/CCT5	6
BP	GO:0021987	cerebral cortex development	7/260	112/18800	0.000941819	0.00688201	0.00537365	TACC3/KIF14/ASPM/H2AX/WDR62/FBXO45/SLC2A1	7
BP	GO:0040020	regulation of meiotic nuclear division	4/260	32/18800	0.000947757	0.00688201	0.00537365	CDC20/RAD51AP1/TRIP13/FBXO5	4
BP	GO:0051443	positive regulation of ubiquitin-protein transferase activity	4/260	32/18800	0.000947757	0.00688201	0.00537365	CDC20/UBE2C/UBE2S/MASTL	4
BP	GO:0051642	centrosome localization	4/260	32/18800	0.000947757	0.00688201	0.00537365	DLGAP5/MAD2L1/AURKA/ASPM	4
BP	GO:2001021	negative regulation of response to DNA damage stimulus	6/260	82/18800	0.000961113	0.00695266	0.00542881	AUNIP/DDIAS/FBXO5/POLQ/PARPBP/RMI2	6
BP	GO:0009411	response to UV	8/260	146/18800	0.000981058	0.00707026	0.00552064	AURKB/FEN1/CDC25A/CHEK1/DTL/PBK/PCLAF/PCNA	8
BP	GO:0016446	somatic hypermutation of immunoglobulin genes	3/260	15/18800	0.00105191	0.00744099	0.00581011	EXO1/POLQ/UNG	3
BP	GO:0045842	positive regulation of mitotic metaphase/anaphase transition	3/260	15/18800	0.00105191	0.00744099	0.00581011	ESPL1/DLGAP5/CDT1	3
BP	GO:0060707	trophoblast giant cell differentiation	3/260	15/18800	0.00105191	0.00744099	0.00581011	PLK4/E2F8/E2F7	3
BP	GO:1901970	positive regulation of mitotic sister chromatid separation	3/260	15/18800	0.00105191	0.00744099	0.00581011	ESPL1/DLGAP5/CDT1	3
BP	GO:1904874	positive regulation of telomerase RNA localization to Cajal body	3/260	15/18800	0.00105191	0.00744099	0.00581011	DKC1/CCT5/RUVBL1	3
BP	GO:0061842	microtubule organizing center localization	4/260	33/18800	0.00106687	0.0075191	0.00587111	DLGAP5/MAD2L1/AURKA/ASPM	4
BP	GO:0032212	positive regulation of telomere maintenance via telomerase	4/260	34/18800	0.00119611	0.00836843	0.00653428	NEK2/AURKB/DKC1/CCT5	4
BP	GO:2000780	negative regulation of double-strand break repair	4/260	34/18800	0.00119611	0.00836843	0.00653428	AUNIP/POLQ/PARPBP/RMI2	4
BP	GO:0007018	microtubule-based movement	14/260	395/18800	0.00126481	0.00881687	0.00688444	KIF4A/KIF2C/KIF18B/KIFC1/KIF23/KIF20A/DLGAP5/KIF11/KIF15/KIF14/CENPE/KIF22/KIF18A/KIF20B	14
BP	GO:0002566	somatic diversification of immune receptors via somatic mutation	3/260	16/18800	0.00128148	0.00883671	0.00689993	EXO1/POLQ/UNG	3
BP	GO:0051447	negative regulation of meiotic cell cycle	3/260	16/18800	0.00128148	0.00883671	0.00689993	TTK/TRIP13/FBXO5	3
BP	GO:1902101	positive regulation of metaphase/anaphase transition of cell cycle	3/260	16/18800	0.00128148	0.00883671	0.00689993	ESPL1/DLGAP5/CDT1	3
BP	GO:0051785	positive regulation of nuclear division	5/260	59/18800	0.00132578	0.0091094	0.00711285	ESPL1/DLGAP5/CDT1/AURKA/RAD51AP1	5
BP	GO:0031110	regulation of microtubule polymerization or depolymerization	6/260	88/18800	0.00138874	0.00950788	0.00742399	TPX2/SKA3/SKA1/PSRC1/CKAP2/STMN1	6
BP	GO:0045738	negative regulation of DNA repair	4/260	36/18800	0.00148676	0.0100902	0.00787872	AUNIP/POLQ/PARPBP/RMI2	4
BP	GO:0071312	cellular response to alkaloid	4/260	36/18800	0.00148676	0.0100902	0.00787872	CCNA2/RAD51/CHEK1/BLM	4
BP	GO:0016570	histone modification	16/260	494/18800	0.00148959	0.0100902	0.00787872	CCNA2/AURKB/UHRF1/AURKA/CHEK1/CDK1/INCENP/NCAPG2/HASPIN/BRCA1/CDK2/SUV39H1/EZH2/VRK1/PHF19/RUVBL1	16
BP	GO:1904356	regulation of telomere maintenance via telomere lengthening	5/260	61/18800	0.0015406	0.0103991	0.00811985	NEK2/AURKB/PIF1/DKC1/CCT5	5
BP	GO:1904358	positive regulation of telomere maintenance via telomere lengthening	4/260	37/18800	0.00164906	0.0110921	0.00866101	NEK2/AURKB/DKC1/CCT5	4
BP	GO:0007096	regulation of exit from mitosis	3/260	18/18800	0.00182954	0.0121779	0.00950882	CDCA5/ANLN/UBE2C	3
BP	GO:1904872	regulation of telomerase RNA localization to Cajal body	3/260	18/18800	0.00182954	0.0121779	0.00950882	DKC1/CCT5/RUVBL1	3
BP	GO:1905820	positive regulation of chromosome separation	3/260	18/18800	0.00182954	0.0121779	0.00950882	ESPL1/DLGAP5/CDT1	3
BP	GO:0071214	cellular response to abiotic stimulus	12/260	323/18800	0.00187961	0.0124249	0.00970164	AURKB/RAD51/CDC25A/CHEK1/RAD51AP1/PBK/BRCA1/BLM/ECT2/H2AX/PCNA/SLC2A1	12
BP	GO:0104004	cellular response to environmental stimulus	12/260	323/18800	0.00187961	0.0124249	0.00970164	AURKB/RAD51/CDC25A/CHEK1/RAD51AP1/PBK/BRCA1/BLM/ECT2/H2AX/PCNA/SLC2A1	12
BP	GO:2001022	positive regulation of response to DNA damage stimulus	7/260	129/18800	0.00213252	0.0139276	0.010875	FOXM1/RAD51AP1/TIMELESS/BRCA1/H2AX/PCNA/RUVBL1	7
BP	GO:0090670	RNA localization to Cajal body	3/260	19/18800	0.00215053	0.0139276	0.010875	DKC1/CCT5/RUVBL1	3
BP	GO:0090671	telomerase RNA localization to Cajal body	3/260	19/18800	0.00215053	0.0139276	0.010875	DKC1/CCT5/RUVBL1	3
BP	GO:0090672	telomerase RNA localization	3/260	19/18800	0.00215053	0.0139276	0.010875	DKC1/CCT5/RUVBL1	3
BP	GO:0090685	RNA localization to nucleus	3/260	19/18800	0.00215053	0.0139276	0.010875	DKC1/CCT5/RUVBL1	3
BP	GO:2000042	negative regulation of double-strand break repair via homologous recombination	3/260	19/18800	0.00215053	0.0139276	0.010875	POLQ/PARPBP/RMI2	3
BP	GO:0071902	positive regulation of protein serine/threonine kinase activity	9/260	208/18800	0.00250254	0.0161528	0.0126125	CDC6/CCNB1/INCENP/PSRC1/DBF4/EZH2/DBF4B/CKS1B/CKS2	9
BP	GO:0072331	signal transduction by p53 class mediator	8/260	170/18800	0.00257079	0.0165376	0.012913	FOXM1/GTSE1/AURKB/AURKA/CHEK1/E2F2/E2F1/E2F7	8
BP	GO:0007004	telomere maintenance via telomerase	5/260	69/18800	0.00266172	0.0170653	0.013325	NEK2/AURKB/PIF1/DKC1/CCT5	5
BP	GO:0033674	positive regulation of kinase activity	15/260	476/18800	0.00269592	0.017227	0.0134512	TPX2/CDC6/CCNB1/KIF14/INCENP/CLSPN/CENPE/PSRC1/ECT2/DBF4/EZH2/DBF4B/CKS1B/BORA/CKS2	15
BP	GO:0031396	regulation of protein ubiquitination	9/260	213/18800	0.00293312	0.0186804	0.0145861	CDC20/BUB1B/MAD2L1/UBE2C/FANCI/UBE2S/BRCA1/FBXO5/MASTL	9
BP	GO:0006997	nucleus organization	7/260	138/18800	0.00311442	0.0197693	0.0154364	CHEK1/CDK1/LMNB1/HMGB2/SUV39H1/VRK1/NDC1	7
BP	GO:0009124	nucleoside monophosphate biosynthetic process	4/260	44/18800	0.00314311	0.0198202	0.0154761	TK1/TYMS/PAICS/GMPS	4
BP	GO:0045840	positive regulation of mitotic nuclear division	4/260	44/18800	0.00314311	0.0198202	0.0154761	ESPL1/DLGAP5/CDT1/AURKA	4
BP	GO:0008584	male gonad development	7/260	140/18800	0.00337316	0.0212012	0.0165544	ASPM/FANCA/KIF18A/HMGB2/BRIP1/NUDT1/DHX37	7
BP	GO:0045910	negative regulation of DNA recombination	4/260	45/18800	0.00341283	0.0213804	0.0166943	BLM/POLQ/PARPBP/RMI2	4
BP	GO:0046546	development of primary male sexual characteristics	7/260	141/18800	0.00350853	0.0219083	0.0171065	ASPM/FANCA/KIF18A/HMGB2/BRIP1/NUDT1/DHX37	7
BP	GO:0046599	regulation of centriole replication	3/260	23/18800	0.00377349	0.0234103	0.0182793	PLK4/STIL/BRCA1	3
BP	GO:1902410	mitotic cytokinetic process	3/260	23/18800	0.00377349	0.0234103	0.0182793	CEP55/KIF20A/KIF20B	3
BP	GO:0006278	RNA-templated DNA biosynthetic process	5/260	75/18800	0.00382352	0.0236442	0.018462	NEK2/AURKB/PIF1/DKC1/CCT5	5
BP	GO:0010824	regulation of centrosome duplication	4/260	47/18800	0.00399863	0.0245685	0.0191837	PLK4/CCNF/STIL/BRCA1	4
BP	GO:0051972	regulation of telomerase activity	4/260	47/18800	0.00399863	0.0245685	0.0191837	NEK2/AURKB/PIF1/DKC1	4
BP	GO:0048146	positive regulation of fibroblast proliferation	4/260	48/18800	0.00431551	0.0264308	0.0206378	CCNA2/CDC6/CCNB1/E2F1	4
BP	GO:0009123	nucleoside monophosphate metabolic process	5/260	78/18800	0.00452338	0.0276157	0.021563	TK1/TYMS/DTYMK/PAICS/GMPS	5
BP	GO:0009219	pyrimidine deoxyribonucleotide metabolic process	3/260	25/18800	0.004802	0.0292236	0.0228185	TYMS/DTYMK/UNG	3
BP	GO:0002200	somatic diversification of immune receptors	5/260	80/18800	0.00503778	0.030465	0.0237879	EXO1/POLQ/HMGB2/UNG/HSPD1	5
BP	GO:0032204	regulation of telomere maintenance	5/260	80/18800	0.00503778	0.030465	0.0237879	NEK2/AURKB/PIF1/DKC1/CCT5	5
BP	GO:0051446	positive regulation of meiotic cell cycle	3/260	26/18800	0.0053735	0.0322915	0.025214	CDC25C/CDC25A/RAD51AP1	3
BP	GO:0060706	cell differentiation involved in embryonic placenta development	3/260	26/18800	0.0053735	0.0322915	0.025214	PLK4/E2F8/E2F7	3
BP	GO:0032206	positive regulation of telomere maintenance	4/260	52/18800	0.00575194	0.0344577	0.0269055	NEK2/AURKB/DKC1/CCT5	4
BP	GO:0001556	oocyte maturation	3/260	27/18800	0.00598415	0.0357162	0.0278881	AURKA/TRIP13/FBXO5	3
BP	GO:0051261	protein depolymerization	6/260	118/18800	0.00599928	0.0357162	0.0278881	TPX2/KIF2C/KIF18B/KIF18A/CKAP2/STMN1	6
BP	GO:0006403	RNA localization	8/260	196/18800	0.00605469	0.0359345	0.0280586	ALYREF/NDC1/DKC1/CCT5/RAN/DDX39A/NUP37/RUVBL1	8
BP	GO:1900087	positive regulation of G1/S transition of mitotic cell cycle	4/260	53/18800	0.00615514	0.0363913	0.0284153	RRM2/CDC6/STIL/RRM1	4
BP	GO:0046785	microtubule polymerization	5/260	84/18800	0.00618861	0.0363913	0.0284153	TPX2/PSRC1/FBXO5/TUBG1/STMN1	5
BP	GO:1900182	positive regulation of protein localization to nucleus	5/260	84/18800	0.00618861	0.0363913	0.0284153	CDK1/ECT2/DKC1/CCT5/RAN	5
BP	GO:2000243	positive regulation of reproductive process	5/260	85/18800	0.00650291	0.0381225	0.0297671	CDC25C/CDC25A/AURKA/RAD51AP1/DHX37	5
BP	GO:0031398	positive regulation of protein ubiquitination	6/260	121/18800	0.00676321	0.0395277	0.0308642	CDC20/UBE2C/FANCI/UBE2S/BRCA1/MASTL	6
BP	GO:1903320	regulation of protein modification by small protein conjugation or removal	9/260	246/18800	0.00743365	0.043314	0.0338207	CDC20/BUB1B/MAD2L1/UBE2C/FANCI/UBE2S/BRCA1/FBXO5/MASTL	9
BP	GO:0010332	response to gamma radiation	4/260	56/18800	0.00747625	0.0434302	0.0339114	RAD51/XRCC2/H2AX/FANCD2	4
BP	GO:0034644	cellular response to UV	5/260	88/18800	0.00751273	0.0435103	0.0339739	AURKB/CDC25A/CHEK1/PBK/PCNA	5
BP	GO:0021537	telencephalon development	9/260	247/18800	0.00762443	0.0440242	0.0343752	TACC3/KIF14/ASPM/H2AX/EZH2/WDR62/FBXO45/RAN/SLC2A1	9
BP	GO:0046661	male sex differentiation	7/260	164/18800	0.00791635	0.0451947	0.0352892	ASPM/FANCA/KIF18A/HMGB2/BRIP1/NUDT1/DHX37	7
BP	GO:0009113	purine nucleobase biosynthetic process	2/260	10/18800	0.00796861	0.0451947	0.0352892	PAICS/GMPS	2
BP	GO:0009157	deoxyribonucleoside monophosphate biosynthetic process	2/260	10/18800	0.00796861	0.0451947	0.0352892	TK1/TYMS	2
BP	GO:0035999	tetrahydrofolate interconversion	2/260	10/18800	0.00796861	0.0451947	0.0352892	TYMS/MTHFD2	2
BP	GO:1903867	extraembryonic membrane development	2/260	10/18800	0.00796861	0.0451947	0.0352892	E2F8/E2F7	2
BP	GO:1904851	positive regulation of establishment of protein localization to telomere	2/260	10/18800	0.00796861	0.0451947	0.0352892	DKC1/CCT5	2
BP	GO:0070979	protein K11-linked ubiquitination	3/260	30/18800	0.00805748	0.045564	0.0355775	UBE2C/UBE2T/UBE2S	3
BP	GO:0070301	cellular response to hydrogen peroxide	5/260	90/18800	0.00824363	0.0464795	0.0362924	CDK1/ECT2/EZH2/PCNA/PPIF	5
BP	GO:0006335	DNA replication-dependent chromatin assembly	3/260	32/18800	0.00964646	0.0524112	0.040924	ASF1B/CHAF1A/CHAF1B	3
BP	GO:0010165	response to X-ray	3/260	32/18800	0.00964646	0.0524112	0.040924	RAD51/BLM/XRCC2	3
BP	GO:0034723	DNA replication-dependent chromatin organization	3/260	32/18800	0.00964646	0.0524112	0.040924	ASF1B/CHAF1A/CHAF1B	3
BP	GO:0071168	protein localization to chromatin	3/260	32/18800	0.00964646	0.0524112	0.040924	CDCA5/ESCO2/EZH2	3
BP	GO:0071539	protein localization to centrosome	3/260	32/18800	0.00964646	0.0524112	0.040924	SPAG5/AURKA/STIL	3
BP	GO:0009120	deoxyribonucleoside metabolic process	2/260	11/18800	0.00965109	0.0524112	0.040924	TK1/DTYMK	2
BP	GO:0070203	regulation of establishment of protein localization to telomere	2/260	11/18800	0.00965109	0.0524112	0.040924	DKC1/CCT5	2
BP	GO:0075522	IRES-dependent viral translational initiation	2/260	11/18800	0.00965109	0.0524112	0.040924	DENR/PTBP1	2
BP	GO:0090657	telomeric loop disassembly	2/260	11/18800	0.00965109	0.0524112	0.040924	BLM/RECQL4	2
BP	GO:1901978	positive regulation of cell cycle checkpoint	2/260	11/18800	0.00965109	0.0524112	0.040924	NDC80/MAD2L1	2
BP	GO:1904869	regulation of protein localization to Cajal body	2/260	11/18800	0.00965109	0.0524112	0.040924	DKC1/CCT5	2
BP	GO:1904871	positive regulation of protein localization to Cajal body	2/260	11/18800	0.00965109	0.0524112	0.040924	DKC1/CCT5	2
BP	GO:2000615	regulation of histone H3-K9 acetylation	2/260	11/18800	0.00965109	0.0524112	0.040924	CHEK1/BRCA1	2
BP	GO:0009112	nucleobase metabolic process	3/260	33/18800	0.0105044	0.0568841	0.0444165	TYMS/PAICS/GMPS	3
BP	GO:0001889	liver development	6/260	134/18800	0.0109032	0.0588773	0.0459729	AURKA/E2F8/TYMS/EZH2/E2F7/PCNA	6
BP	GO:0043279	response to alkaloid	5/260	97/18800	0.0111885	0.0599463	0.0468076	CCNA2/RAD51/CHEK1/BLM/EFTUD2	5
BP	GO:0051973	positive regulation of telomerase activity	3/260	34/18800	0.0114052	0.0599463	0.0468076	NEK2/AURKB/DKC1	3
BP	GO:1905508	protein localization to microtubule organizing center	3/260	34/18800	0.0114052	0.0599463	0.0468076	SPAG5/AURKA/STIL	3
BP	GO:0006285	base-excision repair, AP site formation	2/260	12/18800	0.0114764	0.0599463	0.0468076	UNG/NEIL3	2
BP	GO:0010826	negative regulation of centrosome duplication	2/260	12/18800	0.0114764	0.0599463	0.0468076	CCNF/BRCA1	2
BP	GO:0010992	ubiquitin recycling	2/260	12/18800	0.0114764	0.0599463	0.0468076	UBE2C/UBE2S	2
BP	GO:0046606	negative regulation of centrosome cycle	2/260	12/18800	0.0114764	0.0599463	0.0468076	CCNF/BRCA1	2
BP	GO:0070202	regulation of establishment of protein localization to chromosome	2/260	12/18800	0.0114764	0.0599463	0.0468076	DKC1/CCT5	2
BP	GO:1903405	protein localization to nuclear body	2/260	12/18800	0.0114764	0.0599463	0.0468076	DKC1/CCT5	2
BP	GO:1904667	negative regulation of ubiquitin protein ligase activity	2/260	12/18800	0.0114764	0.0599463	0.0468076	MAD2L1/FBXO5	2
BP	GO:1904816	positive regulation of protein localization to chromosome, telomeric region	2/260	12/18800	0.0114764	0.0599463	0.0468076	DKC1/CCT5	2
BP	GO:1904867	protein localization to Cajal body	2/260	12/18800	0.0114764	0.0599463	0.0468076	DKC1/CCT5	2
BP	GO:2000781	positive regulation of double-strand break repair	4/260	64/18800	0.0118739	0.0618539	0.0482971	FOXM1/RAD51AP1/TIMELESS/RUVBL1	4
BP	GO:0071241	cellular response to inorganic substance	8/260	221/18800	0.0120189	0.0623564	0.0486895	CCNA2/RAD51/TIMELESS/BLM/ECT2/CDK2/EIF4A3/PPIF	8
BP	GO:0022411	cellular component disassembly	13/260	460/18800	0.0120371	0.0623564	0.0486895	TPX2/KIF2C/KIF18B/TOP2A/CDK1/HMGA1/KIF18A/CKAP2/CTSV/VRK1/STMN1/DENR/SSRP1	13
BP	GO:0061008	hepaticobiliary system development	6/260	137/18800	0.0120679	0.0623564	0.0486895	AURKA/E2F8/TYMS/EZH2/E2F7/PCNA	6
BP	GO:1903322	positive regulation of protein modification by small protein conjugation or removal	6/260	140/18800	0.0133176	0.0686288	0.0535871	CDC20/UBE2C/FANCI/UBE2S/BRCA1/MASTL	6
BP	GO:0043970	histone H3-K9 acetylation	2/260	13/18800	0.0134403	0.0688907	0.0537916	CHEK1/BRCA1	2
BP	GO:0072520	seminiferous tubule development	2/260	13/18800	0.0134403	0.0688907	0.0537916	KIF18A/BRIP1	2
BP	GO:0032147	activation of protein kinase activity	6/260	142/18800	0.0141994	0.0725875	0.0566781	TPX2/KIF14/CLSPN/ECT2/DBF4B/BORA	6
BP	GO:1905168	positive regulation of double-strand break repair via homologous recombination	3/260	37/18800	0.014368	0.0732538	0.0571984	RAD51AP1/TIMELESS/RUVBL1	3
BP	GO:0030010	establishment of cell polarity	6/260	143/18800	0.0146552	0.074323	0.0580333	CENPA/NDC80/MAD2L1/SAPCD2/KIF20B/SPDL1	6
BP	GO:0061351	neural precursor cell proliferation	6/260	143/18800	0.0146552	0.074323	0.0580333	RACGAP1/MELK/SHCBP1/KIF14/ASPM/WDR62	6
BP	GO:0016445	somatic diversification of immunoglobulins	4/260	69/18800	0.0153182	0.0774802	0.0604985	EXO1/POLQ/UNG/HSPD1	4
BP	GO:0006177	GMP biosynthetic process	2/260	14/18800	0.0155387	0.0777746	0.0607284	PAICS/GMPS	2
BP	GO:0010457	centriole-centriole cohesion	2/260	14/18800	0.0155387	0.0777746	0.0607284	NEK2/SGO1	2
BP	GO:1904814	regulation of protein localization to chromosome, telomeric region	2/260	14/18800	0.0155387	0.0777746	0.0607284	DKC1/CCT5	2
BP	GO:1990173	protein localization to nucleoplasm	2/260	14/18800	0.0155387	0.0777746	0.0607284	DKC1/CCT5	2
BP	GO:0030900	forebrain development	11/260	376/18800	0.0159511	0.079631	0.0621779	TACC3/KIF14/ASPM/STIL/E2F1/H2AX/EZH2/WDR62/FBXO45/RAN/SLC2A1	11
BP	GO:0002562	somatic diversification of immune receptors via germline recombination within a single locus	4/260	70/18800	0.0160748	0.0798325	0.0623352	EXO1/HMGB2/UNG/HSPD1	4
BP	GO:0016444	somatic cell DNA recombination	4/260	70/18800	0.0160748	0.0798325	0.0623352	EXO1/HMGB2/UNG/HSPD1	4
BP	GO:0042307	positive regulation of protein import into nucleus	3/260	39/18800	0.0165627	0.0818316	0.0638962	CDK1/ECT2/RAN	3
BP	GO:1902275	regulation of chromatin organization	3/260	39/18800	0.0165627	0.0818316	0.0638962	MKI67/CDK2/SSRP1	3
BP	GO:0000266	mitochondrial fission	3/260	40/18800	0.0177265	0.0851504	0.0664876	MTFR2/AURKA/PGAM5	3
BP	GO:0030866	cortical actin cytoskeleton organization	3/260	40/18800	0.0177265	0.0851504	0.0664876	RACGAP1/ANLN/ECT2	3
BP	GO:0031111	negative regulation of microtubule polymerization or depolymerization	3/260	40/18800	0.0177265	0.0851504	0.0664876	TPX2/CKAP2/STMN1	3
BP	GO:0071392	cellular response to estradiol stimulus	3/260	40/18800	0.0177265	0.0851504	0.0664876	CCNA2/H2AZ1/KIF18A	3
BP	GO:0001325	formation of extrachromosomal circular DNA	2/260	15/18800	0.0177674	0.0851504	0.0664876	EXO1/BLM	2
BP	GO:0048308	organelle inheritance	2/260	15/18800	0.0177674	0.0851504	0.0664876	CDK1/VRK1	2
BP	GO:0048313	Golgi inheritance	2/260	15/18800	0.0177674	0.0851504	0.0664876	CDK1/VRK1	2
BP	GO:0051290	protein heterotetramerization	2/260	15/18800	0.0177674	0.0851504	0.0664876	RRM2/RRM1	2
BP	GO:0070316	regulation of G0 to G1 transition	2/260	15/18800	0.0177674	0.0851504	0.0664876	CHEK1/RRM1	2
BP	GO:0070365	hepatocyte differentiation	2/260	15/18800	0.0177674	0.0851504	0.0664876	E2F8/E2F7	2
BP	GO:0090656	t-circle formation	2/260	15/18800	0.0177674	0.0851504	0.0664876	EXO1/BLM	2
BP	GO:0090737	telomere maintenance via telomere trimming	2/260	15/18800	0.0177674	0.0851504	0.0664876	EXO1/BLM	2
BP	GO:0032984	protein-containing complex disassembly	8/260	239/18800	0.0184265	0.0880889	0.0687821	TPX2/KIF2C/KIF18B/HMGA1/KIF18A/CKAP2/STMN1/SSRP1	8
BP	GO:0043462	regulation of ATP-dependent activity	4/260	73/18800	0.0184837	0.0881425	0.0688239	UHRF1/MCM2/DNAJC9/PPIF	4
BP	GO:0006266	DNA ligation	2/260	16/18800	0.0201226	0.0947787	0.0740056	RAD51/TOP2A	2
BP	GO:0009200	deoxyribonucleoside triphosphate metabolic process	2/260	16/18800	0.0201226	0.0947787	0.0740056	TYMS/DTYMK	2
BP	GO:0023035	CD40 signaling pathway	2/260	16/18800	0.0201226	0.0947787	0.0740056	FANCA/FANCD2	2
BP	GO:0035970	peptidyl-threonine dephosphorylation	2/260	16/18800	0.0201226	0.0947787	0.0740056	PPM1G/PGAM5	2
BP	GO:2001224	positive regulation of neuron migration	2/260	16/18800	0.0201226	0.0947787	0.0740056	KIF20B/WDR62	2
BP	GO:1904591	positive regulation of protein import	3/260	42/18800	0.0201876	0.0948519	0.0740628	CDK1/ECT2/RAN	3
CC	GO:0098687	chromosomal region	74/271	366/19594	1.42829e-65	3.99922e-63	2.97686e-63	CDCA5/KIF2C/CDCA8/HJURP/CENPA/SKA3/BUB1B/NEK2/SPAG5/NCAPG/BIRC5/AURKB/RAD51/BUB1/ZWINT/NDC80/CDT1/SKA1/ORC1/CCNB1/FEN1/SPC25/TOP2A/MAD2L1/TTK/NUF2/SPC24/CHEK1/CDK1/SGO1/INCENP/RAD51AP1/MCM4/CENPF/CENPW/CENPE/NCAPD2/MCM6/CENPI/MCM2/DSCC1/CENPN/CENPM/MCM7/ESCO2/CENPU/SGO2/CENPO/KNL1/ERCC6L/BLM/ALYREF/KIF22/RECQL4/H2AX/KIF18A/CDK2/CENPH/KNSTRN/SUV39H1/EZH2/PIF1/MIS18A/MCM5/OIP5/PCNA/SPDL1/ZWILCH/MCM…	74
CC	GO:0000793	condensed chromosome	60/271	255/19594	5.03701e-57	7.05182e-55	5.2491e-55	KIF2C/HJURP/CENPA/SKA3/BUB1B/NEK2/SPAG5/NCAPG/BIRC5/AURKB/RAD51/BUB1/ZWINT/NDC80/CDT1/SKA1/CCNB1/SPC25/MKI67/TOP2A/MAD2L1/TTK/NUF2/SPC24/CHEK1/SGO1/INCENP/CENPF/CENPW/CENPE/NCAPD2/CENPI/CENPN/CENPM/CENPU/BRCA1/SGO2/CENPO/KNL1/ERCC6L/BLM/KIF22/H2AX/KIF18A/CDK2/CENPH/KNSTRN/HMGB2/SUV39H1/PSMC3IP/TUBG1/FANCD2/SPDL1/ZWILCH/CENPK/DSN1/SMC2/NCAPD3/TOPBP1/NUP37	60
CC	GO:0000775	chromosome, centromeric region	55/271	227/19594	6.03126e-53	5.62918e-51	4.19014e-51	CDCA5/KIF2C/CDCA8/HJURP/CENPA/SKA3/BUB1B/NEK2/SPAG5/NCAPG/BIRC5/AURKB/BUB1/ZWINT/NDC80/CDT1/SKA1/CCNB1/SPC25/TOP2A/MAD2L1/TTK/NUF2/SPC24/SGO1/INCENP/CENPF/CENPW/CENPE/NCAPD2/CENPI/DSCC1/CENPN/CENPM/ESCO2/CENPU/SGO2/CENPO/KNL1/ERCC6L/KIF22/KIF18A/CENPH/KNSTRN/SUV39H1/EZH2/MIS18A/OIP5/SPDL1/ZWILCH/CENPK/DSN1/CENPL/NCAPD3/NUP37	55
CC	GO:0000779	condensed chromosome, centromeric region	45/271	156/19594	4.76896e-47	3.33827e-45	2.48488e-45	KIF2C/HJURP/CENPA/SKA3/BUB1B/NEK2/SPAG5/NCAPG/BIRC5/AURKB/BUB1/ZWINT/NDC80/CDT1/SKA1/CCNB1/SPC25/MAD2L1/TTK/NUF2/SPC24/SGO1/INCENP/CENPF/CENPW/CENPE/NCAPD2/CENPI/CENPN/CENPM/CENPU/SGO2/CENPO/KNL1/ERCC6L/KIF22/KIF18A/CENPH/KNSTRN/SPDL1/ZWILCH/CENPK/DSN1/NCAPD3/NUP37	45
CC	GO:0000776	kinetochore	42/271	146/19594	7.36472e-44	4.12424e-42	3.06993e-42	KIF2C/HJURP/CENPA/SKA3/BUB1B/NEK2/SPAG5/BIRC5/AURKB/BUB1/ZWINT/NDC80/CDT1/SKA1/CCNB1/SPC25/MAD2L1/TTK/NUF2/SPC24/SGO1/INCENP/CENPF/CENPW/CENPE/CENPI/CENPN/CENPM/CENPU/SGO2/CENPO/KNL1/ERCC6L/KIF22/KIF18A/CENPH/KNSTRN/SPDL1/ZWILCH/CENPK/DSN1/NUP37	42
CC	GO:0005819	spindle	57/271	402/19594	4.943e-41	2.30673e-39	1.71704e-39	TPX2/CDC20/KIF4A/KIF2C/CDCA8/KIF18B/KIFC1/ESPL1/KIF23/SKA3/BUB1B/NEK2/SPAG5/BIRC5/AURKB/CDC6/KIF20A/DLGAP5/CKAP2L/KIF11/SKA1/RACGAP1/CCNB1/TACC3/MAD2L1/TTK/SHCBP1/AURKA/AUNIP/KIF15/CDK1/KIF14/POC1A/FAM83D/HMMR/PLK4/SGO1/INCENP/CENPF/CENPE/PSRC1/ASPM/HASPIN/FBXO5/KIF22/ECT2/KIF18A/KNSTRN/CKAP2/KIF20B/TUBG1/CDC7/WDR62/SPDL1/VRK1/BORA/TOPBP1	57
CC	GO:0000228	nuclear chromosome	37/271	228/19594	7.83415e-29	3.13366e-27	2.33257e-27	NEK2/CDC45/BIRC5/RAD51/MCM10/ORC1/TOP2A/CHEK1/INCENP/MCM4/ORC6/NCAPD2/MCM6/MCM2/TIMELESS/GINS2/MCM7/BRCA1/GINS1/BLM/GINS4/GINS3/H2AX/WDHD1/SUV39H1/PSMC3IP/MCM5/TUBG1/PCNA/PRIM1/TONSL/MCM3/POLE2/SMC2/POLE/TOPBP1/RUVBL1	37
CC	GO:0072686	mitotic spindle	28/271	160/19594	5.92025e-23	2.07209e-21	1.54238e-21	TPX2/KIF18B/KIFC1/ESPL1/KIF23/SKA3/SPAG5/AURKB/CDC6/CKAP2L/KIF11/SKA1/RACGAP1/TACC3/MAD2L1/AURKA/CDK1/FAM83D/CENPE/ASPM/KIF22/ECT2/KIF18A/KNSTRN/KIF20B/TUBG1/CDC7/WDR62	28
CC	GO:0000922	spindle pole	28/271	169/19594	2.83174e-22	8.80984e-21	6.5577e-21	TPX2/CDC20/NEK2/SPAG5/AURKB/CDC6/DLGAP5/CKAP2L/KIF11/CCNB1/TACC3/MAD2L1/AURKA/AUNIP/POC1A/FAM83D/PLK4/SGO1/CENPF/PSRC1/ASPM/KNSTRN/CKAP2/KIF20B/TUBG1/WDR62/SPDL1/TOPBP1	28
CC	GO:0071162	CMG complex	11/271	11/19594	2.89218e-21	8.09811e-20	6.02791e-20	CDC45/MCM4/MCM6/MCM2/GINS2/MCM7/GINS1/GINS4/GINS3/MCM5/MCM3	11
CC	GO:0031261	DNA replication preinitiation complex	11/271	12/19594	3.42838e-20	8.72678e-19	6.49588e-19	CDC45/MCM4/MCM6/MCM2/GINS2/MCM7/GINS1/GINS4/GINS3/MCM5/MCM3	11
CC	GO:0005657	replication fork	17/271	60/19594	3.40846e-18	7.95307e-17	5.91995e-17	MCM10/UHRF1/CHEK1/TIMELESS/RFC4/BLM/XRCC2/H2AX/WDHD1/PIF1/RFC3/RFC5/PCNA/PRIM1/TONSL/RFC2/MCM3	17
CC	GO:0005874	microtubule	35/271	435/19594	4.00093e-17	8.61739e-16	6.41445e-16	TPX2/GTSE1/KIF4A/KIF2C/KIF18B/KIFC1/KIF23/SKA3/NEK2/SPAG5/BIRC5/AURKB/KIF20A/KIF11/SKA1/RACGAP1/AURKA/KIF15/CDK1/KIF14/INCENP/CENPE/PSRC1/ASPM/KIF22/TUBA1B/TUBA1C/KIF18A/KNSTRN/CKAP2/KIF20B/TUBG1/TUBB/CCT5/STMN1	35
CC	GO:0030496	midbody	24/271	203/19594	8.97846e-16	1.79569e-14	1.33664e-14	KIF4A/CDCA8/KIF23/CEP55/NEK2/SPAG5/BIRC5/AURKB/KIF20A/RACGAP1/SHCBP1/AURKA/ANLN/CDK1/KIF14/INCENP/CENPF/CENPE/PSRC1/ASPM/ECT2/KIF20B/RAN/SLC2A1	24
CC	GO:0000781	chromosome, telomeric region	20/271	166/19594	1.68704e-13	3.14914e-12	2.3441e-12	RAD51/ORC1/FEN1/CHEK1/CDK1/RAD51AP1/MCM4/MCM6/MCM2/MCM7/BLM/ALYREF/RECQL4/H2AX/CDK2/EZH2/PIF1/MCM5/PCNA/MCM3	20
CC	GO:0051233	spindle midzone	11/271	36/19594	1.2796e-12	2.2393e-11	1.66685e-11	CDCA8/KIF18B/AURKB/CDC6/RACGAP1/AURKA/KIF14/INCENP/CENPE/KIF18A/KIF20B	11
CC	GO:0005871	kinesin complex	11/271	49/19594	5.29329e-11	8.71835e-10	6.4896e-10	KIF2C/KIF18B/KIFC1/KIF23/KIF20A/KIF11/KIF15/KIF14/KIF22/KIF18A/KIF20B	11
CC	GO:0000940	outer kinetochore	7/271	12/19594	6.69012e-11	1.04069e-09	7.74645e-10	SKA3/BUB1B/NDC80/SKA1/CCNB1/CENPF/SPDL1	7
CC	GO:0005876	spindle microtubule	13/271	83/19594	1.13547e-10	1.67333e-09	1.24556e-09	KIF4A/KIF18B/SKA3/BIRC5/AURKB/KIF11/SKA1/AURKA/CDK1/CENPE/PSRC1/KIF18A/TUBG1	13
CC	GO:0005875	microtubule associated complex	16/271	160/19594	7.8913e-10	1.10478e-08	8.22356e-09	KIF2C/CDCA8/KIF18B/KIFC1/KIF23/BIRC5/AURKB/KIF20A/KIF11/AURKA/KIF15/KIF14/INCENP/KIF22/KIF18A/KIF20B	16
CC	GO:0000307	cyclin-dependent protein kinase holoenzyme complex	10/271	49/19594	1.1092e-09	1.47893e-08	1.10086e-08	CCNA2/CCNB2/CCNB1/CDK1/CCNF/CCNE1/CDK2/CKS1B/PCNA/CKS2	10
CC	GO:0032993	protein-DNA complex	18/271	220/19594	1.79033e-09	2.2786e-08	1.6961e-08	CENPA/CDC45/MCM4/MCM6/MCM2/GINS2/MCM7/GINS1/GINS4/GINS3/H2AZ1/H2AX/MCM5/PCNA/PRIM1/MCM3/TEAD4/RUVBL1	18
CC	GO:0000792	heterochromatin	11/271	69/19594	2.59499e-09	3.15911e-08	2.35152e-08	CENPA/UHRF1/INCENP/EME1/ESCO2/HMGA1/H2AZ1/WDR76/SUV39H1/EZH2/NCAPD3	11
CC	GO:0000794	condensed nuclear chromosome	11/271	74/19594	5.59492e-09	6.5274e-08	4.85874e-08	NEK2/RAD51/CHEK1/INCENP/BRCA1/BLM/H2AX/SUV39H1/PSMC3IP/TUBG1/TOPBP1	11
CC	GO:0043596	nuclear replication fork	7/271	28/19594	8.27543e-08	9.26848e-07	6.89909e-07	MCM10/TIMELESS/WDHD1/PCNA/PRIM1/TONSL/MCM3	7
CC	GO:0044815	DNA packaging complex	15/271	198/19594	1.15144e-07	1.24002e-06	9.2302e-07	NCAPH/CENPA/NCAPG/NDC80/SPC25/NUF2/SPC24/NCAPD2/NCAPG2/SGO2/H2AZ1/H2AX/SMC2/NCAPD3/RUVBL1	15
CC	GO:0045120	pronucleus	5/271	13/19594	5.73345e-07	5.9458e-06	4.42582e-06	CCNA2/AURKA/CENPF/EZH2/SLC2A1	5
CC	GO:0072687	meiotic spindle	5/271	14/19594	8.81801e-07	8.51394e-06	6.33745e-06	AURKA/INCENP/ASPM/FBXO5/BORA	5
CC	GO:1990023	mitotic spindle midzone	5/271	14/19594	8.81801e-07	8.51394e-06	6.33745e-06	KIF18B/AURKB/CENPE/KIF18A/KIF20B	5
CC	GO:1902554	serine/threonine protein kinase complex	10/271	99/19594	1.14593e-06	1.06954e-05	7.9612e-06	CCNA2/CCNB2/CCNB1/CDK1/CCNF/CCNE1/CDK2/CKS1B/PCNA/CKS2	10
CC	GO:0010369	chromocenter	5/271	15/19594	1.30777e-06	1.18121e-05	8.7925e-06	CDCA8/AURKB/INCENP/ESCO2/OIP5	5
CC	GO:1902911	protein kinase complex	10/271	115/19594	4.51689e-06	3.95228e-05	2.94192e-05	CCNA2/CCNB2/CCNB1/CDK1/CCNF/CCNE1/CDK2/CKS1B/PCNA/CKS2	10
CC	GO:0005814	centriole	11/271	147/19594	6.50279e-06	5.51752e-05	4.10703e-05	CEP55/TOP2A/AURKA/POC1A/PLK4/TEDC2/CCNF/STIL/TUBG1/WDR62/RAN	11
CC	GO:0043073	germ cell nucleus	5/271	21/19594	8.2789e-06	6.81792e-05	5.07499e-05	AURKA/TRIP13/H2AX/RAN/TOPBP1	5
CC	GO:0097431	mitotic spindle pole	6/271	36/19594	9.10415e-06	7.11216e-05	5.29401e-05	SPAG5/AURKB/AURKA/FAM83D/ASPM/KIF20B	6
CC	GO:0045171	intercellular bridge	8/271	75/19594	9.1442e-06	7.11216e-05	5.29401e-05	TPX2/CDCA8/CEP55/CDC6/KIF20A/FAM83D/KIF20B/CDC7	8
CC	GO:0005721	pericentric heterochromatin	5/271	23/19594	1.33833e-05	0.000101279	7.53884e-05	CENPA/INCENP/ESCO2/EZH2/NCAPD3	5
CC	GO:0061695	transferase complex, transferring phosphorus-containing groups	14/271	259/19594	1.6105e-05	0.000118669	8.83322e-05	CCNA2/CCNB2/CCNB1/CDK1/CCNF/CCNE1/CDK2/CKS1B/PCNA/PRIM1/MCM3/POLE2/POLE/CKS2	14
CC	GO:0000800	lateral element	4/271	13/19594	2.31946e-05	0.000166525	0.000123955	RAD51/INCENP/BRCA1/BLM	4
CC	GO:0000152	nuclear ubiquitin ligase complex	6/271	45/19594	3.43027e-05	0.000240119	0.000178735	CDC20/BUB1B/RAD51/UBE2C/UBE2S/BRCA1	6
CC	GO:0001673	male germ cell nucleus	4/271	16/19594	5.71385e-05	0.000390214	0.00029046	TRIP13/H2AX/RAN/TOPBP1	4
CC	GO:0090734	site of DNA damage	8/271	97/19594	6.02924e-05	0.00040195	0.000299196	RAD51/AUNIP/HROB/TIMELESS/TRAIP/ESCO2/H2AX/WDR76	8
CC	GO:0032153	cell division site	7/271	73/19594	6.70089e-05	0.000436337	0.000324792	CEP55/KIF20A/RACGAP1/ANLN/PLK4/ECT2/MASTL	7
CC	GO:0034399	nuclear periphery	9/271	127/19594	6.93528e-05	0.000441336	0.000328513	KIF4A/UHRF1/CENPF/CENPW/LMNB1/BLM/SUV39H1/PCNA/RUVBL1	9
CC	GO:0005881	cytoplasmic microtubule	7/271	75/19594	7.97345e-05	0.000496126	0.000369297	GTSE1/KIF2C/KIF18B/TUBA1B/TUBA1C/KIF18A/TUBG1	7
CC	GO:1990752	microtubule end	5/271	33/19594	8.4306e-05	0.000513167	0.000381982	KIF2C/KIF18B/SPAG5/ASPM/KNSTRN	5
CC	GO:0032154	cleavage furrow	6/271	55/19594	0.000108766	0.000647968	0.000482322	CEP55/KIF20A/RACGAP1/PLK4/ECT2/MASTL	6
CC	GO:0042575	DNA polymerase complex	4/271	19/19594	0.00011777	0.000686994	0.000511372	PRIM1/MCM3/POLE2/POLE	4
CC	GO:0005680	anaphase-promoting complex	4/271	21/19594	0.000177933	0.00101676	0.000756838	CDC20/BUB1B/UBE2C/UBE2S	4
CC	GO:0035371	microtubule plus-end	4/271	23/19594	0.000257591	0.00144251	0.00107375	KIF2C/KIF18B/SPAG5/KNSTRN	4
CC	GO:0005652	nuclear lamina	3/271	10/19594	0.000292196	0.00160421	0.00119411	LMNB1/SUV39H1/PCNA	3
CC	GO:0005635	nuclear envelope	17/271	479/19594	0.000389859	0.00209924	0.00156259	MAD2L1/DTL/CENPF/LMNB1/LMNB2/RANBP1/GAPDH/TUBB/TMPO/BRIP1/NDC1/NUDT1/DHX37/RAN/CSE1L/NUP37/LRRC59	17
CC	GO:0034451	centriolar satellite	7/271	107/19594	0.000720362	0.00380569	0.0028328	CEP55/SPAG5/DLGAP5/TACC3/CENPU/KNSTRN/WDR62	7
CC	GO:0000803	sex chromosome	4/271	30/19594	0.000738855	0.0038311	0.00285172	PLK4/ESCO2/H2AX/CDK2	4
CC	GO:0031461	cullin-RING ubiquitin ligase complex	9/271	175/19594	0.000759033	0.00386417	0.00287634	CDC20/BUB1B/DTL/UBE2C/CCNF/UBE2S/CKS1B/FBXO45/CKS2	9
CC	GO:0016363	nuclear matrix	7/271	109/19594	0.000804172	0.00402086	0.00299297	KIF4A/UHRF1/CENPF/CENPW/LMNB1/BLM/RUVBL1	7
CC	GO:0001741	XY body	3/271	14/19594	0.000850706	0.00410686	0.00305698	PLK4/ESCO2/H2AX	3
CC	GO:0031616	spindle pole centrosome	3/271	14/19594	0.000850706	0.00410686	0.00305698	AURKB/DLGAP5/AURKA	3
CC	GO:0030894	replisome	3/271	15/19594	0.00105255	0.00499516	0.0037182	PCNA/PRIM1/MCM3	3
CC	GO:0090543	Flemming body	4/271	35/19594	0.00133725	0.0062405	0.00464518	KIF23/CEP55/RACGAP1/KIF14	4
CC	GO:0000795	synaptonemal complex	4/271	41/19594	0.00242407	0.0109474	0.00814883	RAD51/INCENP/BRCA1/BLM	4
CC	GO:0099086	synaptonemal structure	4/271	41/19594	0.00242407	0.0109474	0.00814883	RAD51/INCENP/BRCA1/BLM	4
CC	GO:0000151	ubiquitin ligase complex	11/271	302/19594	0.00335286	0.0149016	0.0110922	CDC20/BUB1B/RAD51/DTL/UBE2C/CCNF/UBE2S/BRCA1/CKS1B/FBXO45/CKS2	11
CC	GO:0015030	Cajal body	5/271	79/19594	0.00478168	0.0209198	0.0155719	CDK2/OIP5/RDM1/DKC1/EFTUD2	5
CC	GO:0070938	contractile ring	2/271	10/19594	0.00797074	0.0343355	0.025558	ANLN/KIF20B	2
CC	GO:0005643	nuclear pore	5/271	93/19594	0.00944112	0.0391742	0.0291598	MAD2L1/RANBP1/NDC1/RAN/NUP37	5
CC	GO:0000235	astral microtubule	2/271	11/19594	0.00965365	0.0391742	0.0291598	KIF18B/KIF18A	2
CC	GO:0005818	aster	2/271	11/19594	0.00965365	0.0391742	0.0291598	KIF18B/KIF18A	2
CC	GO:0031074	nucleocytoplasmic transport complex	2/271	11/19594	0.00965365	0.0391742	0.0291598	KPNA2/RAN	2
CC	GO:0019005	SCF ubiquitin ligase complex	4/271	62/19594	0.0106584	0.0426337	0.0317349	CCNF/CKS1B/FBXO45/CKS2	4
CC	GO:0101031	chaperone complex	3/271	34/19594	0.0114111	0.0446422	0.0332299	DNAJC9/CCT5/RUVBL1	3
CC	GO:0099524	postsynaptic cytosol	2/271	12/19594	0.0114794	0.0446422	0.0332299	FBXO45/EIF4A3	2
CC	GO:0005677	chromatin silencing complex	2/271	13/19594	0.0134438	0.0508685	0.0378645	SUV39H1/EZH2	2
CC	GO:0043601	nuclear replisome	2/271	13/19594	0.0134438	0.0508685	0.0378645	PRIM1/MCM3	2
CC	GO:0099522	cytosolic region	2/271	15/19594	0.0177719	0.0663484	0.0493872	FBXO45/EIF4A3	2
CC	GO:0035861	site of double-strand break	4/271	73/19594	0.0184975	0.0681487	0.0507273	RAD51/TIMELESS/ESCO2/H2AX	4
CC	GO:0000930	gamma-tubulin complex	2/271	16/19594	0.0201276	0.0731911	0.0544806	BRCA1/TUBG1	2
CC	GO:1990391	DNA repair complex	3/271	44/19594	0.0228378	0.0819819	0.0610241	FANCI/BRCA1/FANCD2	3
CC	GO:0005828	kinetochore microtubule	2/271	18/19594	0.0252026	0.0893258	0.0664906	CENPE/KIF18A	2
CC	GO:0016607	nuclear speck	11/271	411/19594	0.0284671	0.0996348	0.0741642	CDC25C/NCAPG2/ALYREF/KIF22/H2AX/E2F7/OIP5/RMI2/DDX39A/EFTUD2/EIF4A3	11
MF	GO:0017116	single-stranded DNA helicase activity	14/265	23/18410	8.45925e-21	9.6301e-19	8.19329e-19	RAD51/MCM4/MCM6/MCM2/DSCC1/RFC4/MCM7/POLQ/PIF1/RFC3/MCM5/RFC5/RFC2/MCM3	14
MF	GO:0140097	catalytic activity, acting on DNA	30/265	222/18410	1.11831e-20	9.6301e-19	8.19329e-19	EXO1/RAD51/RAD54L/FEN1/TOP2A/MCM4/MCM6/MCM2/DSCC1/RFC4/MCM7/ERCC6L/BLM/POLQ/RECQL4/XRCC2/PIF1/RFC3/UNG/MCM5/RFC5/PCNA/NEIL3/RFC2/MCM3/POLE2/BRIP1/DKC1/POLE/RUVBL1	30
MF	GO:0003678	DNA helicase activity	20/265	72/18410	1.13423e-20	9.6301e-19	8.19329e-19	RAD51/RAD54L/MCM4/MCM6/MCM2/DSCC1/RFC4/MCM7/ERCC6L/BLM/POLQ/RECQL4/PIF1/RFC3/MCM5/RFC5/RFC2/MCM3/BRIP1/RUVBL1	20
MF	GO:0016887	ATP hydrolysis activity	35/265	325/18410	1.1363e-20	9.6301e-19	8.19329e-19	KIF2C/KIF18B/KIFC1/KIF23/KIF20A/ORC1/RAD54L/KIF15/KIF14/MCM4/TRIP13/MCM6/MCM2/RFC4/MCM7/ERCC6L/BLM/KIF22/RECQL4/KIF18A/ATAD2/PIF1/KIF20B/MCM5/RFC5/RFC2/MCM3/BRIP1/DHX37/CCT5/DDX39A/SMC2/HSPD1/EIF4A3/RUVBL1	35
MF	GO:0008094	ATP-dependent activity, acting on DNA	22/265	103/18410	6.76427e-20	4.58617e-18	3.90191e-18	RAD51/RAD54L/TOP2A/MCM4/MCM6/MCM2/DSCC1/RFC4/MCM7/ERCC6L/BLM/POLQ/RECQL4/XRCC2/PIF1/RFC3/MCM5/RFC5/RFC2/MCM3/BRIP1/RUVBL1	22
MF	GO:0004386	helicase activity	23/265	155/18410	5.10117e-17	2.88216e-15	2.45214e-15	RAD51/RAD54L/MCM4/MCM6/MCM2/DSCC1/RFC4/MCM7/ERCC6L/BLM/POLQ/RECQL4/PIF1/RFC3/MCM5/RFC5/RFC2/MCM3/BRIP1/DHX37/DDX39A/EIF4A3/RUVBL1	23
MF	GO:0008017	microtubule binding	27/265	272/18410	2.87304e-15	1.39137e-13	1.18378e-13	TPX2/GTSE1/KIF4A/KIF2C/KIF18B/KIFC1/KIF23/SPAG5/BIRC5/KIF20A/DLGAP5/KIF11/SKA1/RACGAP1/SPC24/KIF15/KIF14/FAM83D/CENPF/CENPE/PSRC1/DIAPH3/KIF22/KIF18A/KNSTRN/KIF20B/GAPDH	27
MF	GO:0015631	tubulin binding	30/265	376/18410	2.80265e-14	1.18762e-12	1.01043e-12	TPX2/GTSE1/KIF4A/KIF2C/KIF18B/KIFC1/KIF23/SPAG5/BIRC5/KIF20A/DLGAP5/KIF11/SKA1/RACGAP1/SPC24/KIF15/KIF14/FAM83D/CENPF/CENPE/PSRC1/DIAPH3/BRCA1/KIF22/KIF18A/KNSTRN/KIF20B/GAPDH/CCT5/STMN1	30
MF	GO:0003697	single-stranded DNA binding	18/265	120/18410	1.15642e-13	4.35587e-12	3.70597e-12	CDC45/RAD51/MCM10/RAD54L/RAD51AP1/MCM4/MCM6/MCM2/HROB/MCM7/BLM/RECQL4/HMGB2/MCM5/NEIL3/MCM3/SMC2/HSPD1	18
MF	GO:0003777	microtubule motor activity	13/265	67/18410	1.07828e-11	3.65535e-10	3.10997e-10	KIF4A/KIF2C/KIF18B/KIFC1/KIF23/KIF20A/KIF11/KIF15/KIF14/CENPE/KIF22/KIF18A/KIF20B	13
MF	GO:0003688	DNA replication origin binding	7/265	16/18410	1.21158e-09	3.4227e-08	2.91203e-08	CDC45/CDC6/MCM10/ORC1/MCM2/MCM5/HSPD1	7
MF	GO:0035173	histone kinase activity	7/265	16/18410	1.21158e-09	3.4227e-08	2.91203e-08	AURKB/AURKA/CHEK1/CDK1/HASPIN/CDK2/VRK1	7
MF	GO:0003684	damaged DNA binding	11/265	68/18410	3.31692e-09	8.6495e-08	7.35899e-08	FEN1/AUNIP/BRCA1/BLM/POLQ/RECQL4/H2AX/HMGB2/UNG/PCNA/NEIL3	11
MF	GO:0003774	cytoskeletal motor activity	13/265	111/18410	7.27322e-09	1.76116e-07	1.49839e-07	KIF4A/KIF2C/KIF18B/KIFC1/KIF23/KIF20A/KIF11/KIF15/KIF14/CENPE/KIF22/KIF18A/KIF20B	13
MF	GO:0000217	DNA secondary structure binding	8/265	36/18410	3.54055e-08	8.00164e-07	6.80779e-07	CLSPN/RAD51AP1/HMGA1/BLM/RECQL4/XRCC2/HMGB2/NEIL3	8
MF	GO:0008574	plus-end-directed microtubule motor activity	6/265	17/18410	9.10787e-08	1.92973e-06	1.64181e-06	KIF18B/KIF11/KIF14/CENPE/KIF18A/KIF20B	6
MF	GO:0042393	histone binding	16/265	250/18410	7.30439e-07	1.45658e-05	1.23926e-05	HJURP/UHRF1/ASF1B/NCAPD2/MCM2/NCAPG2/CHAF1B/DNAJC9/H2AX/ATAD2/CKS1B/TONSL/PHF19/NCAPD3/CKS2/SSRP1	16
MF	GO:0016538	cyclin-dependent protein serine/threonine kinase regulator activity	7/265	50/18410	6.96458e-06	0.000131166	0.000111596	CCNA2/CCNB2/CCNB1/CCNF/CCNE1/CKS1B/CKS2	7
MF	GO:0070182	DNA polymerase binding	5/265	22/18410	1.28236e-05	0.000228801	0.000194664	RAD51/CDT1/FANCI/FANCD2/PCNA	5
MF	GO:0106310	protein serine kinase activity	17/265	360/18410	1.96695e-05	0.000333399	0.000283655	PKMYT1/BUB1B/NEK2/AURKB/BUB1/MELK/TTK/AURKA/CHEK1/CDK1/PLK4/PBK/HASPIN/CDK2/CDC7/MASTL/VRK1	17
MF	GO:0043138	3'-5' DNA helicase activity	4/265	14/18410	3.74987e-05	0.000605337	0.00051502	MCM6/MCM2/BLM/MCM5	4
MF	GO:0019887	protein kinase regulator activity	12/265	207/18410	4.81079e-05	0.0007413	0.000630697	TPX2/CCNA2/CCNB2/CCNB1/INCENP/CCNF/NCAPG2/CCNE1/DBF4/DBF4B/CKS1B/CKS2	12
MF	GO:0043539	protein serine/threonine kinase activator activity	6/265	53/18410	0.000109446	0.00161314	0.00137246	CCNB1/INCENP/DBF4/DBF4B/CKS1B/CKS2	6
MF	GO:0019207	kinase regulator activity	12/265	235/18410	0.000160891	0.00227259	0.00193352	TPX2/CCNA2/CCNB2/CCNB1/INCENP/CCNF/NCAPG2/CCNE1/DBF4/DBF4B/CKS1B/CKS2	12
MF	GO:0004674	protein serine/threonine kinase activity	17/265	430/18410	0.000175298	0.00237705	0.00202239	PKMYT1/BUB1B/NEK2/AURKB/BUB1/MELK/TTK/AURKA/CHEK1/CDK1/PLK4/PBK/HASPIN/CDK2/CDC7/MASTL/VRK1	17
MF	GO:0004712	protein serine/threonine/tyrosine kinase activity	17/265	446/18410	0.000268941	0.00350658	0.00298339	PKMYT1/BUB1B/NEK2/AURKB/BUB1/MELK/TTK/AURKA/CHEK1/CDK1/PLK4/PBK/HASPIN/CDK2/CDC7/MASTL/VRK1	17
MF	GO:0043139	5'-3' DNA helicase activity	3/265	10/18410	0.000328349	0.0041226	0.0035075	PIF1/BRIP1/RUVBL1	3
MF	GO:0019104	DNA N-glycosylase activity	3/265	13/18410	0.000757902	0.00838241	0.00713175	UNG/PCNA/NEIL3	3
MF	GO:0061575	cyclin-dependent protein serine/threonine kinase activator activity	3/265	13/18410	0.000757902	0.00838241	0.00713175	CCNB1/CKS1B/CKS2	3
MF	GO:0140666	annealing activity	3/265	13/18410	0.000757902	0.00838241	0.00713175	RAD54L/BLM/RECQL4	3
MF	GO:0030295	protein kinase activator activity	7/265	104/18410	0.000766533	0.00838241	0.00713175	TPX2/CCNB1/INCENP/DBF4/DBF4B/CKS1B/CKS2	7
MF	GO:0019209	kinase activator activity	7/265	110/18410	0.00106765	0.0113104	0.00962292	TPX2/CCNB1/INCENP/DBF4/DBF4B/CKS1B/CKS2	7
MF	GO:0034061	DNA polymerase activity	4/265	36/18410	0.00172081	0.0172179	0.014649	POLQ/POLE2/DKC1/POLE	4
MF	GO:0000400	four-way junction DNA binding	3/265	17/18410	0.00172687	0.0172179	0.014649	BLM/XRCC2/HMGB2	3
MF	GO:0051010	microtubule plus-end binding	3/265	21/18410	0.00323711	0.0313538	0.0266758	KIF2C/KIF18A/KNSTRN	3
MF	GO:0008022	protein C-terminus binding	8/265	179/18410	0.0044762	0.0421508	0.0358619	CDC20/RAD51/MKI67/TOP2A/MAD2L1/CENPF/PCNA/TOPBP1	8
MF	GO:0004529	exodeoxyribonuclease activity	3/265	24/18410	0.0047722	0.042573	0.0362211	EXO1/FEN1/POLE	3
MF	GO:0016895	exodeoxyribonuclease activity, producing 5'-phosphomonoesters	3/265	24/18410	0.0047722	0.042573	0.0362211	EXO1/FEN1/POLE	3
MF	GO:0003887	DNA-directed DNA polymerase activity	3/265	25/18410	0.0053659	0.0466421	0.0396831	POLQ/POLE2/POLE	3
MF	GO:0008186	ATP-dependent activity, acting on RNA	5/265	79/18410	0.00564235	0.0478189	0.0406843	PIF1/BRIP1/DHX37/DDX39A/EIF4A3	5
MF	GO:0004523	RNA-DNA hybrid ribonuclease activity	2/265	10/18410	0.00860723	0.067857	0.0577327	EXO1/FEN1	2
MF	GO:0032356	oxidized DNA binding	2/265	10/18410	0.00860723	0.067857	0.0577327	BLM/RECQL4	2
MF	GO:0051880	G-quadruplex DNA binding	2/265	10/18410	0.00860723	0.067857	0.0577327	BLM/PIF1	2
MF	GO:0140142	nucleocytoplasmic carrier activity	3/265	30/18410	0.0089852	0.0692269	0.0588982	KPNA2/RAN/CSE1L	3
MF	GO:0005049	nuclear export signal receptor activity	2/265	11/18410	0.0104207	0.0785025	0.0667899	RAN/CSE1L	2
MF	GO:0030515	snoRNA binding	3/265	32/18410	0.0107483	0.0792107	0.0673924	DKC1/NUDT1/DHX37	3
MF	GO:0016891	endoribonuclease activity, producing 5'-phosphomonoesters	3/265	34/18410	0.0126977	0.0896772	0.0762973	EXO1/FEN1/POP1	3
MF	GO:0030332	cyclin binding	3/265	34/18410	0.0126977	0.0896772	0.0762973	NDC80/CDK1/CDK2	3
KEGG	hsa04110	Cell cycle	32/120	126/8164	7.73302e-32	9.51162e-30	8.14002e-30	CDC20/PKMYT1/ESPL1/CCNA2/CCNB2/BUB1B/CDC45/CDC6/BUB1/ORC1/CCNB1/CDC25C/MAD2L1/TTK/CDC25A/CHEK1/CDK1/MCM4/ORC6/E2F2/MCM6/MCM2/MCM7/E2F1/CCNE1/DBF4/CDK2/MCM5/PTTG1/CDC7/PCNA/MCM3	32
KEGG	hsa03030	DNA replication	15/120	36/8164	5.66539e-19	3.48421e-17	2.98178e-17	FEN1/MCM4/MCM6/MCM2/RFC4/MCM7/RFC3/MCM5/RFC5/PCNA/PRIM1/RFC2/MCM3/POLE2/POLE	15
KEGG	hsa04114	Oocyte meiosis	15/120	131/8164	6.09211e-10	2.49776e-08	2.13758e-08	CDC20/PKMYT1/ESPL1/CCNB2/BUB1/CCNB1/CDC25C/MAD2L1/AURKA/CDK1/SGO1/FBXO5/CCNE1/CDK2/PTTG1	15
KEGG	hsa03460	Fanconi anemia pathway	10/120	54/8164	4.4768e-09	1.37662e-07	1.17811e-07	RAD51/UBE2T/EME1/FANCI/BRCA1/FANCA/BLM/FANCD2/RMI2/BRIP1	10
KEGG	hsa04914	Progesterone-mediated oocyte maturation	12/120	102/8164	2.58766e-08	6.36564e-07	5.4477e-07	PKMYT1/CCNA2/CCNB2/BUB1/CCNB1/CDC25C/MAD2L1/CDC25A/AURKA/CDK1/KIF22/CDK2	12
KEGG	hsa03440	Homologous recombination	8/120	41/8164	1.09786e-07	2.2506e-06	1.92606e-06	RAD51/RAD54L/EME1/BRCA1/BLM/XRCC2/BRIP1/TOPBP1	8
KEGG	hsa04218	Cellular senescence	13/120	156/8164	4.12212e-07	7.24315e-06	6.19867e-06	FOXM1/CCNA2/MYBL2/CCNB2/CCNB1/CDC25A/CHEK1/CDK1/E2F2/E2F1/CCNE1/CDK2/EIF4EBP1	13
KEGG	hsa03430	Mismatch repair	6/120	23/8164	7.32094e-07	1.05503e-05	9.02889e-06	EXO1/RFC4/RFC3/RFC5/PCNA/RFC2	6
KEGG	hsa05166	Human T-cell leukemia virus 1 infection	15/120	222/8164	7.7197e-07	1.05503e-05	9.02889e-06	CDC20/ESPL1/CCNA2/CCNB2/BUB1B/MAD2L1/CHEK1/E2F2/E2F1/RANBP1/CCNE1/CDK2/PTTG1/RAN/SLC2A1	15
KEGG	hsa03420	Nucleotide excision repair	7/120	47/8164	4.80586e-06	5.91121e-05	5.0588e-05	RFC4/RFC3/RFC5/PCNA/RFC2/POLE2/POLE	7
KEGG	hsa03410	Base excision repair	6/120	33/8164	7.12334e-06	7.96519e-05	6.8166e-05	FEN1/UNG/PCNA/NEIL3/POLE2/POLE	6
KEGG	hsa04115	p53 signaling pathway	8/120	73/8164	1.04366e-05	0.000106975	9.15488e-05	GTSE1/CCNB2/RRM2/CCNB1/CHEK1/CDK1/CCNE1/CDK2	8
KEGG	hsa03013	Nucleocytoplasmic transport	7/120	108/8164	0.00101822	0.00963396	0.00824472	KPNA2/ALYREF/NDC1/RAN/CSE1L/EIF4A3/NUP37	7
KEGG	hsa01232	Nucleotide metabolism	6/120	85/8164	0.00151147	0.0127345	0.0108982	RRM2/TK1/TYMS/DTYMK/RRM1/GMPS	6
KEGG	hsa00240	Pyrimidine metabolism	5/120	58/8164	0.00155299	0.0127345	0.0108982	RRM2/TK1/TYMS/DTYMK/RRM1	5
KEGG	hsa05222	Small cell lung cancer	6/120	92/8164	0.00226775	0.0174333	0.0149194	E2F2/E2F1/CCNE1/CDK2/CKS1B/CKS2	6
KEGG	hsa05161	Hepatitis B	7/120	162/8164	0.00972935	0.0703947	0.0602437	CCNA2/BIRC5/E2F2/E2F1/CCNE1/CDK2/PCNA	7
