# Supplementary material for: PLK1 overexpression as a dual-role biomarker and therapeutic vulnerability in pulmonary adenocarcinoma
Source: PeerJ journal article supplement (doi:10.7717/peerj.20618), 2026-01-15
Supplement: Supporting_Figure_S1.tar [file Fig. S1B-Coexpression_Detailed_Gene_List.xlsx]

## Sheet: PLK1_Coexpression_Detailed_Gene
Gene_Symbol	Correlation	P_Value	Type
CCNE2	0.785537	0	Positive_Correlated
CENPF	0.732861	0	Positive_Correlated
KIF23	0.746862	0	Positive_Correlated
KIF4A	0.752668	0	Positive_Correlated
SGOL1	0.730214	0	Positive_Correlated
TRIP13	0.742252	0	Positive_Correlated
TUBA1C	0.729617	0	Positive_Correlated
ASF1B	0.733288	0	Positive_Correlated
AURKA	0.744557	0	Positive_Correlated
AURKB	0.768121	0	Positive_Correlated
BIRC5	0.770255	0	Positive_Correlated
BUB1	0.740545	0	Positive_Correlated
CDC20	0.75207	0	Positive_Correlated
CDC25A	0.774012	0	Positive_Correlated
CDCA3	0.73602	0	Positive_Correlated
DLGAP5	0.789635	0	Positive_Correlated
DTL	0.73269	0	Positive_Correlated
EXO1	0.741228	0	Positive_Correlated
GSG2	0.783745	0	Positive_Correlated
GTSE1	0.803893	0	Positive_Correlated
AKAP13	-0.729702	0	Negative_Correlated
USP4	-0.702369	6.51e-09	Negative_Correlated
KIAA0430	-0.702354	6.52e-09	Negative_Correlated
ATG16L2	-0.685407	2.07e-08	Negative_Correlated
KIAA1109	-0.682248	2.55e-08	Negative_Correlated
C4orf38	-0.701443	2.99e-08	Negative_Correlated
CTSH	-0.664746	7.69e-08	Negative_Correlated
SLC22A3	-0.684282	7.81e-08	Negative_Correlated
C15orf52	-0.683856	7.98e-08	Negative_Correlated
CYLD	-0.680782	9.35e-08	Negative_Correlated
ALDH2	-0.65968	1.04e-07	Negative_Correlated
USP47	-0.67805	1.07e-07	Negative_Correlated
ZNF662	-0.675318	1.23e-07	Negative_Correlated
FYCO1	-0.673269	1.36e-07	Negative_Correlated
SPTLC3	-0.671305	1.5e-07	Negative_Correlated
FAM13A-AS1	-0.670366	1.57e-07	Negative_Correlated
TP73-AS1	-0.670366	1.57e-07	Negative_Correlated
MAP3K1	-0.66661	1.89e-07	Negative_Correlated
TMOD4	-0.666012	1.95e-07	Negative_Correlated
CG030	-0.664731	2.08e-07	Negative_Correlated
PLK1	NA	NA	PLK1
