# Supplementary material for: PLK1 overexpression as a dual-role biomarker and therapeutic vulnerability in pulmonary adenocarcinoma
Source: PeerJ journal article supplement (doi:10.7717/peerj.20618), 2026-01-15
Supplement: Supporting_Figure_S1.tar [file Fig. S1C GSE115002_52tumor__PLK1(Expression&Group.xlsx]

## Sheet: Sheet1
Sample	PLK1	Group
GSM3162502	4.75827	H
GSM3162503	4.44324	H
GSM3162504	3.10231	L
GSM3162505	3.51216	H
GSM3162506	1.10304	L
GSM3162507	2.86305	L
GSM3162508	3.61024	H
GSM3162509	2.87226	L
GSM3162510	2.1374	L
GSM3162511	2.6773	L
GSM3162512	2.49491	L
GSM3162513	3.26481	L
GSM3162514	3.66427	H
GSM3162515	4.21377	H
GSM3162516	3.42806	L
GSM3162517	3.11125	L
GSM3162518	3.85851	H
GSM3162519	1.11549	L
GSM3162520	4.09733	H
GSM3162521	1.90312	L
GSM3162522	3.12935	L
GSM3162523	3.004	L
GSM3162524	4.45542	H
GSM3162525	3.07137	L
GSM3162526	3.604	H
GSM3162527	3.428	L
GSM3162528	4.09154	H
GSM3162529	1.91923	L
GSM3162530	3.12956	L
GSM3162531	2.84975	L
GSM3162532	3.68074	H
GSM3162533	4.38766	H
GSM3162534	2.87594	L
GSM3162535	3.08182	L
GSM3162536	4.01723	H
GSM3162537	3.23716	L
GSM3162538	4.3562	H
GSM3162539	3.28206	L
GSM3162540	4.55597	H
GSM3162541	4.36827	H
GSM3162542	3.78301	H
GSM3162543	6.06538	H
GSM3162544	4.81966	H
GSM3162545	3.98434	H
GSM3162546	2.22027	L
GSM3162547	4.1058	H
GSM3162548	5.58208	H
GSM3162549	3.59169	H
GSM3162550	2.8315	L
GSM3162551	4.68737	H
GSM3162552	1.92183	L
GSM3162553	4.49483	H
