# Supplementary material for: PLK1 overexpression as a dual-role biomarker and therapeutic vulnerability in pulmonary adenocarcinoma
Source: PeerJ journal article supplement (doi:10.7717/peerj.20618), 2026-01-15
Supplement: Supporting_Figure_S1.tar [file Fig. S1C GSE115002_52tumor_clinicaltriats(Stage).xlsx]

## Sheet: Sheet1
Sample	Stage
GSM3162502	IA
GSM3162503	IB
GSM3162504	IA
GSM3162505	IA
GSM3162506	IA
GSM3162507	IA
GSM3162508	IA
GSM3162509	IB
GSM3162510	IB
GSM3162511	IB
GSM3162512	IA
GSM3162513	IA
GSM3162514	IB
GSM3162515	IIB
GSM3162516	IIB
GSM3162517	IIA
GSM3162518	IIB
GSM3162519	IIB
GSM3162520	IIB
GSM3162521	IIB
GSM3162522	IIA
GSM3162523	IIA
GSM3162524	IIA
GSM3162525	IIB
GSM3162526	IIA
GSM3162527	IIA
GSM3162528	IIIB
GSM3162529	IIIA
GSM3162530	IIIA
GSM3162531	IIIA
GSM3162532	IIIA
GSM3162533	IIIA
GSM3162534	IIIA
GSM3162535	IIIA
GSM3162536	IIIA
GSM3162537	IIIA
GSM3162538	IIIA
GSM3162539	IIIB
GSM3162540	IIIB
GSM3162541	IV
GSM3162542	IV
GSM3162543	IV
GSM3162544	IVC
GSM3162545	IV
GSM3162546	IVC
GSM3162547	IVA
GSM3162548	IVC
GSM3162549	IV
GSM3162550	IV
GSM3162551	IV
GSM3162552	IV
GSM3162553	IVA
