# Supplementary material for: PLK1 overexpression as a dual-role biomarker and therapeutic vulnerability in pulmonary adenocarcinoma
Source: PeerJ journal article supplement (doi:10.7717/peerj.20618), 2026-01-15
Supplement: Supporting_Figure_S1.tar [file Fig. S1D GSE115002_52tumor_immuneinfiltration(ssGSEA).xlsx]

## Sheet: Sheet 1
Sample
