# Supplementary material for: PLK1 overexpression as a dual-role biomarker and therapeutic vulnerability in pulmonary adenocarcinoma
Source: PeerJ journal article supplement (doi:10.7717/peerj.20618), 2026-01-15
Supplement: Supporting_Figure_S1.tar [file Fig. S1E GO_Analysis_result (for top 20 PLK1 positive correlated genes).xlsx]

## Sheet: Sheet1
ID	Description	GeneRatio	BgRatio	pvalue	p.adjust	qvalue	geneID	Count	ONT							ID	Description	GeneRatio	BgRatio	pvalue	p.adjust	qvalue	geneID	Count	ONT
GO:0051301	cell division	12/18	575/17910	1.66800339757634e-14	8.40795381900207e-12	4.70408951949936e-12	CCNE2/CENPF/KIF23/KIF4A/TUBA1C/AURKA/AURKB/BIRC5/BUB1/CDC20/CDC25A/CDCA3	12	BP							GO:0051301	cell division	12/18	575/17910	1.66800339757634e-14	8.40795381900207e-12	4.70408951949936e-12	CCNE2/CENPF/KIF23/KIF4A/TUBA1C/AURKA/AURKB/BIRC5/BUB1/CDC20/CDC25A/CDCA3	12	BP
GO:1903047	mitotic cell cycle process	13/18	816/17910	2.30354899150742e-14	8.40795381900207e-12	4.70408951949936e-12	CCNE2/CENPF/KIF23/KIF4A/TRIP13/AURKA/AURKB/BUB1/CDC20/CDC25A/DLGAP5/DTL/GTSE1	13	BP							GO:1903047	mitotic cell cycle process	13/18	816/17910	2.30354899150742e-14	8.40795381900207e-12	4.70408951949936e-12	CCNE2/CENPF/KIF23/KIF4A/TRIP13/AURKA/AURKB/BUB1/CDC20/CDC25A/DLGAP5/DTL/GTSE1	13	BP
GO:0000278	mitotic cell cycle	13/18	934/17910	1.3071514104753e-13	3.18073509882323e-11	1.77956051671725e-11	CCNE2/CENPF/KIF23/KIF4A/TRIP13/AURKA/AURKB/BUB1/CDC20/CDC25A/DLGAP5/DTL/GTSE1	13	BP							GO:0000278	mitotic cell cycle	13/18	934/17910	1.3071514104753e-13	3.18073509882323e-11	1.77956051671725e-11	CCNE2/CENPF/KIF23/KIF4A/TRIP13/AURKA/AURKB/BUB1/CDC20/CDC25A/DLGAP5/DTL/GTSE1	13	BP
GO:0007049	cell cycle	15/18	1716/17910	3.07148493309857e-13	5.60546000290489e-11	3.13614777379538e-11	CCNE2/CENPF/KIF23/KIF4A/TRIP13/AURKA/AURKB/BUB1/CDC20/CDC25A/CDCA3/DLGAP5/DTL/EXO1/GTSE1	15	BP							GO:0007049	cell cycle	15/18	1716/17910	3.07148493309857e-13	5.60546000290489e-11	3.13614777379538e-11	CCNE2/CENPF/KIF23/KIF4A/TRIP13/AURKA/AURKB/BUB1/CDC20/CDC25A/CDCA3/DLGAP5/DTL/EXO1/GTSE1	15	BP
GO:0000819	sister chromatid segregation	8/18	157/17910	1.18360874178045e-12	1.72806876299945e-10	9.66821456443817e-11	CENPF/KIF23/KIF4A/TRIP13/AURKB/BUB1/CDC20/DLGAP5	8	BP							GO:0000819	sister chromatid segregation	8/18	157/17910	1.18360874178045e-12	1.72806876299945e-10	9.66821456443817e-11	CENPF/KIF23/KIF4A/TRIP13/AURKB/BUB1/CDC20/DLGAP5	8	BP
GO:0007059	chromosome segregation	9/18	275/17910	1.79377167795151e-12	2.18242220817434e-10	1.22102352814945e-10	CENPF/KIF23/KIF4A/TRIP13/AURKB/BIRC5/BUB1/CDC20/DLGAP5	9	BP							GO:0007059	chromosome segregation	9/18	275/17910	1.79377167795151e-12	2.18242220817434e-10	1.22102352814945e-10	CENPF/KIF23/KIF4A/TRIP13/AURKB/BIRC5/BUB1/CDC20/DLGAP5	9	BP
GO:0022402	cell cycle process	13/18	1280/17910	7.31387179947465e-12	6.75263220273361e-10	3.7779687017457e-10	CCNE2/CENPF/KIF23/KIF4A/TRIP13/AURKA/AURKB/BUB1/CDC20/CDC25A/DLGAP5/DTL/GTSE1	13	BP							GO:0022402	cell cycle process	13/18	1280/17910	7.31387179947465e-12	6.75263220273361e-10	3.7779687017457e-10	CCNE2/CENPF/KIF23/KIF4A/TRIP13/AURKA/AURKB/BUB1/CDC20/CDC25A/DLGAP5/DTL/GTSE1	13	BP
GO:0000075	cell cycle checkpoint	8/18	197/17910	7.40014487970806e-12	6.75263220273361e-10	3.7779687017457e-10	CENPF/TRIP13/AURKA/AURKB/BUB1/CDC20/DTL/GTSE1	8	BP							GO:0000075	cell cycle checkpoint	8/18	197/17910	7.40014487970806e-12	6.75263220273361e-10	3.7779687017457e-10	CENPF/TRIP13/AURKA/AURKB/BUB1/CDC20/DTL/GTSE1	8	BP
GO:0098813	nuclear chromosome segregation	8/18	220/17910	1.79679987184287e-11	1.45740434049477e-09	8.1538988336261e-10	CENPF/KIF23/KIF4A/TRIP13/AURKB/BUB1/CDC20/DLGAP5	8	BP							GO:0098813	nuclear chromosome segregation	8/18	220/17910	1.79679987184287e-11	1.45740434049477e-09	8.1538988336261e-10	CENPF/KIF23/KIF4A/TRIP13/AURKB/BUB1/CDC20/DLGAP5	8	BP
GO:0000070	mitotic sister chromatid segregation	7/18	132/17910	2.99288074549783e-11	1.94459356926748e-09	1.08796294863127e-09	CENPF/KIF23/KIF4A/TRIP13/AURKB/CDC20/DLGAP5	7	BP							GO:0000070	mitotic sister chromatid segregation	7/18	132/17910	2.99288074549783e-11	1.94459356926748e-09	1.08796294863127e-09	CENPF/KIF23/KIF4A/TRIP13/AURKB/CDC20/DLGAP5	7	BP
GO:0044772	mitotic cell cycle phase transition	10/18	565/17910	3.14501056071669e-11	1.94459356926748e-09	1.08796294863127e-09	CCNE2/CENPF/TRIP13/AURKA/AURKB/CDC20/CDC25A/DLGAP5/DTL/GTSE1	10	BP							GO:0044772	mitotic cell cycle phase transition	10/18	565/17910	3.14501056071669e-11	1.94459356926748e-09	1.08796294863127e-09	CCNE2/CENPF/TRIP13/AURKA/AURKB/CDC20/CDC25A/DLGAP5/DTL/GTSE1	10	BP
GO:0140014	mitotic nuclear division	8/18	237/17910	3.26179210311927e-11	1.94459356926748e-09	1.08796294863127e-09	CENPF/KIF23/KIF4A/TRIP13/AURKA/AURKB/CDC20/DLGAP5	8	BP							GO:0140014	mitotic nuclear division	8/18	237/17910	3.26179210311927e-11	1.94459356926748e-09	1.08796294863127e-09	CENPF/KIF23/KIF4A/TRIP13/AURKA/AURKB/CDC20/DLGAP5	8	BP
GO:0051276	chromosome organization	12/18	1097/17910	3.46297484938045e-11	1.94459356926748e-09	1.08796294863127e-09	CCNE2/CENPF/KIF23/KIF4A/TRIP13/ASF1B/AURKA/AURKB/BUB1/CDC20/DLGAP5/EXO1	12	BP							GO:0051276	chromosome organization	12/18	1097/17910	3.46297484938045e-11	1.94459356926748e-09	1.08796294863127e-09	CCNE2/CENPF/KIF23/KIF4A/TRIP13/ASF1B/AURKA/AURKB/BUB1/CDC20/DLGAP5/EXO1	12	BP
GO:0033045	regulation of sister chromatid segregation	6/18	70/17910	5.12222743344932e-11	2.67087573315572e-09	1.49430394299123e-09	CENPF/TRIP13/AURKB/BUB1/CDC20/DLGAP5	6	BP							GO:0033045	regulation of sister chromatid segregation	6/18	70/17910	5.12222743344932e-11	2.67087573315572e-09	1.49430394299123e-09	CENPF/TRIP13/AURKB/BUB1/CDC20/DLGAP5	6	BP
GO:0007093	mitotic cell cycle checkpoint	7/18	147/17910	6.41281592639542e-11	2.99954091276925e-09	1.6781858315133e-09	CENPF/TRIP13/AURKA/AURKB/BUB1/CDC20/GTSE1	7	BP							GO:0007093	mitotic cell cycle checkpoint	7/18	147/17910	6.41281592639542e-11	2.99954091276925e-09	1.6781858315133e-09	CENPF/TRIP13/AURKA/AURKB/BUB1/CDC20/GTSE1	7	BP
GO:0044770	cell cycle phase transition	10/18	609/17910	6.57433624716549e-11	2.99954091276925e-09	1.6781858315133e-09	CCNE2/CENPF/TRIP13/AURKA/AURKB/CDC20/CDC25A/DLGAP5/DTL/GTSE1	10	BP							GO:0044770	cell cycle phase transition	10/18	609/17910	6.57433624716549e-11	2.99954091276925e-09	1.6781858315133e-09	CCNE2/CENPF/TRIP13/AURKA/AURKB/CDC20/CDC25A/DLGAP5/DTL/GTSE1	10	BP
GO:0051983	regulation of chromosome segregation	6/18	93/17910	2.93861070583947e-10	1.26187400897812e-08	7.05994398678461e-09	CENPF/TRIP13/AURKB/BUB1/CDC20/DLGAP5	6	BP							GO:0051983	regulation of chromosome segregation	6/18	93/17910	2.93861070583947e-10	1.26187400897812e-08	7.05994398678461e-09	CENPF/TRIP13/AURKB/BUB1/CDC20/DLGAP5	6	BP
GO:0030071	regulation of mitotic metaphase/anaphase transition	5/18	44/17910	5.92108519931389e-10	2.31999493558821e-08	1.29799284067516e-08	CENPF/TRIP13/AURKB/CDC20/DLGAP5	5	BP							GO:0030071	regulation of mitotic metaphase/anaphase transition	5/18	44/17910	5.92108519931389e-10	2.31999493558821e-08	1.29799284067516e-08	CENPF/TRIP13/AURKB/CDC20/DLGAP5	5	BP
GO:0010564	regulation of cell cycle process	10/18	764/17910	6.0383429830378e-10	2.31999493558821e-08	1.29799284067516e-08	CENPF/KIF23/TRIP13/AURKA/AURKB/BUB1/CDC20/DLGAP5/DTL/GTSE1	10	BP							GO:0010564	regulation of cell cycle process	10/18	764/17910	6.0383429830378e-10	2.31999493558821e-08	1.29799284067516e-08	CENPF/KIF23/TRIP13/AURKA/AURKB/BUB1/CDC20/DLGAP5/DTL/GTSE1	10	BP
GO:1902099	regulation of metaphase/anaphase transition of cell cycle	5/18	46/17910	7.46451300097045e-10	2.68998770476821e-08	1.50499672595539e-08	CENPF/TRIP13/AURKB/CDC20/DLGAP5	5	BP							GO:1902099	regulation of metaphase/anaphase transition of cell cycle	5/18	46/17910	7.46451300097045e-10	2.68998770476821e-08	1.50499672595539e-08	CENPF/TRIP13/AURKB/CDC20/DLGAP5	5	BP
GO:0007091	metaphase/anaphase transition of mitotic cell cycle	5/18	47/17910	8.34808514354861e-10	2.68998770476821e-08	1.50499672595539e-08	CENPF/TRIP13/AURKB/CDC20/DLGAP5	5	BP							GO:0007091	metaphase/anaphase transition of mitotic cell cycle	5/18	47/17910	8.34808514354861e-10	2.68998770476821e-08	1.50499672595539e-08	CENPF/TRIP13/AURKB/CDC20/DLGAP5	5	BP
GO:0010965	regulation of mitotic sister chromatid separation	5/18	47/17910	8.34808514354861e-10	2.68998770476821e-08	1.50499672595539e-08	CENPF/TRIP13/AURKB/CDC20/DLGAP5	5	BP							GO:0010965	regulation of mitotic sister chromatid separation	5/18	47/17910	8.34808514354861e-10	2.68998770476821e-08	1.50499672595539e-08	CENPF/TRIP13/AURKB/CDC20/DLGAP5	5	BP
GO:0000280	nuclear division	8/18	357/17910	8.47530372735188e-10	2.68998770476821e-08	1.50499672595539e-08	CENPF/KIF23/KIF4A/TRIP13/AURKA/AURKB/CDC20/DLGAP5	8	BP							GO:0000280	nuclear division	8/18	357/17910	8.47530372735188e-10	2.68998770476821e-08	1.50499672595539e-08	CENPF/KIF23/KIF4A/TRIP13/AURKA/AURKB/CDC20/DLGAP5	8	BP
GO:0044784	metaphase/anaphase transition of cell cycle	5/18	49/17910	1.03651759386272e-09	3.02663137407913e-08	1.69334242702625e-08	CENPF/TRIP13/AURKB/CDC20/DLGAP5	5	BP							GO:0044784	metaphase/anaphase transition of cell cycle	5/18	49/17910	1.03651759386272e-09	3.02663137407913e-08	1.69334242702625e-08	CENPF/TRIP13/AURKB/CDC20/DLGAP5	5	BP
GO:0051306	mitotic sister chromatid separation	5/18	49/17910	1.03651759386272e-09	3.02663137407913e-08	1.69334242702625e-08	CENPF/TRIP13/AURKB/CDC20/DLGAP5	5	BP							GO:0051306	mitotic sister chromatid separation	5/18	49/17910	1.03651759386272e-09	3.02663137407913e-08	1.69334242702625e-08	CENPF/TRIP13/AURKB/CDC20/DLGAP5	5	BP
GO:1905818	regulation of chromosome separation	5/18	52/17910	1.41014045888224e-09	3.95924051916936e-08	2.2151194252887e-08	CENPF/TRIP13/AURKB/CDC20/DLGAP5	5	BP							GO:1905818	regulation of chromosome separation	5/18	52/17910	1.41014045888224e-09	3.95924051916936e-08	2.2151194252887e-08	CENPF/TRIP13/AURKB/CDC20/DLGAP5	5	BP
GO:0051726	regulation of cell cycle	11/18	1149/17910	1.5148659958582e-09	4.09574880361661e-08	2.29149320231182e-08	CENPF/KIF23/TRIP13/AURKA/AURKB/BUB1/CDC20/CDC25A/DLGAP5/DTL/GTSE1	11	BP							GO:0051726	regulation of cell cycle	11/18	1149/17910	1.5148659958582e-09	4.09574880361661e-08	2.29149320231182e-08	CENPF/KIF23/TRIP13/AURKA/AURKB/BUB1/CDC20/CDC25A/DLGAP5/DTL/GTSE1	11	BP
GO:0048285	organelle fission	8/18	395/17910	1.88181443456033e-09	4.9061590615323e-08	2.74490225793011e-08	CENPF/KIF23/KIF4A/TRIP13/AURKA/AURKB/CDC20/DLGAP5	8	BP							GO:0048285	organelle fission	8/18	395/17910	1.88181443456033e-09	4.9061590615323e-08	2.74490225793011e-08	CENPF/KIF23/KIF4A/TRIP13/AURKA/AURKB/CDC20/DLGAP5	8	BP
GO:0033047	regulation of mitotic sister chromatid segregation	5/18	57/17910	2.26495996756828e-09	5.70145095284429e-08	3.18985287628491e-08	CENPF/TRIP13/AURKB/CDC20/DLGAP5	5	BP							GO:0033047	regulation of mitotic sister chromatid segregation	5/18	57/17910	2.26495996756828e-09	5.70145095284429e-08	3.18985287628491e-08	CENPF/TRIP13/AURKB/CDC20/DLGAP5	5	BP
GO:0007346	regulation of mitotic cell cycle	9/18	622/17910	2.54957803459948e-09	6.20397321752541e-08	3.47100448219158e-08	CENPF/TRIP13/AURKA/AURKB/BUB1/CDC20/DLGAP5/DTL/GTSE1	9	BP							GO:0007346	regulation of mitotic cell cycle	9/18	622/17910	2.54957803459948e-09	6.20397321752541e-08	3.47100448219158e-08	CENPF/TRIP13/AURKA/AURKB/BUB1/CDC20/DLGAP5/DTL/GTSE1	9	BP
GO:1901988	negative regulation of cell cycle phase transition	7/18	254/17910	2.95961536229096e-09	6.96941682087871e-08	3.8992555537144e-08	CENPF/TRIP13/AURKA/AURKB/CDC20/DTL/GTSE1	7	BP							GO:1901988	negative regulation of cell cycle phase transition	7/18	254/17910	2.95961536229096e-09	6.96941682087871e-08	3.8992555537144e-08	CENPF/TRIP13/AURKA/AURKB/CDC20/DTL/GTSE1	7	BP
GO:0015630	microtubule cytoskeleton	11/18	1102/18675	6.23990520554703e-10	7.30068909049002e-08	3.1527942091185e-08	CENPF/KIF23/KIF4A/TUBA1C/AURKA/AURKB/BIRC5/CDC20/DLGAP5/DTL/GTSE1	11	CC							GO:0015630	microtubule cytoskeleton	11/18	1102/18675	6.23990520554703e-10	7.30068909049002e-08	3.1527942091185e-08	CENPF/KIF23/KIF4A/TUBA1C/AURKA/AURKB/BIRC5/CDC20/DLGAP5/DTL/GTSE1	11	CC
GO:1901990	regulation of mitotic cell cycle phase transition	8/18	428/17910	3.53595802437492e-09	8.0664042431053e-08	4.51299905742589e-08	CENPF/TRIP13/AURKA/AURKB/CDC20/DLGAP5/DTL/GTSE1	8	BP							GO:1901990	regulation of mitotic cell cycle phase transition	8/18	428/17910	3.53595802437492e-09	8.0664042431053e-08	4.51299905742589e-08	CENPF/TRIP13/AURKA/AURKB/CDC20/DLGAP5/DTL/GTSE1	8	BP
GO:0007088	regulation of mitotic nuclear division	6/18	150/17910	5.33342503647449e-09	1.17981826564436e-07	6.60085778038949e-08	CENPF/TRIP13/AURKA/AURKB/CDC20/DLGAP5	6	BP							GO:0007088	regulation of mitotic nuclear division	6/18	150/17910	5.33342503647449e-09	1.17981826564436e-07	6.60085778038949e-08	CENPF/TRIP13/AURKA/AURKB/CDC20/DLGAP5	6	BP
GO:0051304	chromosome separation	5/18	68/17910	5.60131450950035e-09	1.2026351740986e-07	6.72851402379608e-08	CENPF/TRIP13/AURKB/CDC20/DLGAP5	5	BP							GO:0051304	chromosome separation	5/18	68/17910	5.60131450950035e-09	1.2026351740986e-07	6.72851402379608e-08	CENPF/TRIP13/AURKB/CDC20/DLGAP5	5	BP
GO:1901987	regulation of cell cycle phase transition	8/18	464/17910	6.65906645038115e-09	1.38889100250807e-07	7.770579797738e-08	CENPF/TRIP13/AURKA/AURKB/CDC20/DLGAP5/DTL/GTSE1	8	BP							GO:1901987	regulation of cell cycle phase transition	8/18	464/17910	6.65906645038115e-09	1.38889100250807e-07	7.770579797738e-08	CENPF/TRIP13/AURKA/AURKB/CDC20/DLGAP5/DTL/GTSE1	8	BP
GO:0045930	negative regulation of mitotic cell cycle	7/18	308/17910	1.12433293230163e-08	2.27989733494498e-07	1.2755589992194e-07	CENPF/TRIP13/AURKA/AURKB/BUB1/CDC20/GTSE1	7	BP							GO:0045930	negative regulation of mitotic cell cycle	7/18	308/17910	1.12433293230163e-08	2.27989733494498e-07	1.2755589992194e-07	CENPF/TRIP13/AURKA/AURKB/BUB1/CDC20/GTSE1	7	BP
GO:0051783	regulation of nuclear division	6/18	172/17910	1.21281011076934e-08	2.39284156989626e-07	1.33874914076388e-07	CENPF/TRIP13/AURKA/AURKB/CDC20/DLGAP5	6	BP							GO:0051783	regulation of nuclear division	6/18	172/17910	1.21281011076934e-08	2.39284156989626e-07	1.33874914076388e-07	CENPF/TRIP13/AURKA/AURKB/CDC20/DLGAP5	6	BP
GO:0007094	mitotic spindle assembly checkpoint	4/18	30/17910	1.92512448054146e-08	3.42766066047626e-07	1.91771065070626e-07	CENPF/TRIP13/AURKB/CDC20	4	BP							GO:0007094	mitotic spindle assembly checkpoint	4/18	30/17910	1.92512448054146e-08	3.42766066047626e-07	1.91771065070626e-07	CENPF/TRIP13/AURKB/CDC20	4	BP
GO:0031577	spindle checkpoint	4/18	30/17910	1.92512448054146e-08	3.42766066047626e-07	1.91771065070626e-07	CENPF/TRIP13/AURKB/CDC20	4	BP							GO:0031577	spindle checkpoint	4/18	30/17910	1.92512448054146e-08	3.42766066047626e-07	1.91771065070626e-07	CENPF/TRIP13/AURKB/CDC20	4	BP
GO:0071173	spindle assembly checkpoint	4/18	30/17910	1.92512448054146e-08	3.42766066047626e-07	1.91771065070626e-07	CENPF/TRIP13/AURKB/CDC20	4	BP							GO:0071173	spindle assembly checkpoint	4/18	30/17910	1.92512448054146e-08	3.42766066047626e-07	1.91771065070626e-07	CENPF/TRIP13/AURKB/CDC20	4	BP
GO:0071174	mitotic spindle checkpoint	4/18	30/17910	1.92512448054146e-08	3.42766066047626e-07	1.91771065070626e-07	CENPF/TRIP13/AURKB/CDC20	4	BP							GO:0071174	mitotic spindle checkpoint	4/18	30/17910	1.92512448054146e-08	3.42766066047626e-07	1.91771065070626e-07	CENPF/TRIP13/AURKB/CDC20	4	BP
GO:0051225	spindle assembly	5/18	90/17910	2.33027008176341e-08	4.05023133258878e-07	2.26602704692783e-07	KIF23/KIF4A/AURKA/AURKB/CDC20	5	BP							GO:0051225	spindle assembly	5/18	90/17910	2.33027008176341e-08	4.05023133258878e-07	2.26602704692783e-07	KIF23/KIF4A/AURKA/AURKB/CDC20	5	BP
GO:0010948	negative regulation of cell cycle process	7/18	344/17910	2.40752684058805e-08	4.08719672937042e-07	2.28670848016687e-07	CENPF/TRIP13/AURKA/AURKB/CDC20/DTL/GTSE1	7	BP							GO:0010948	negative regulation of cell cycle process	7/18	344/17910	2.40752684058805e-08	4.08719672937042e-07	2.28670848016687e-07	CENPF/TRIP13/AURKA/AURKB/CDC20/DTL/GTSE1	7	BP
GO:0045841	negative regulation of mitotic metaphase/anaphase transition	4/18	32/17910	2.52292846705733e-08	4.09275062433744e-07	2.28981577828829e-07	CENPF/TRIP13/AURKB/CDC20	4	BP							GO:0045841	negative regulation of mitotic metaphase/anaphase transition	4/18	32/17910	2.52292846705733e-08	4.09275062433744e-07	2.28981577828829e-07	CENPF/TRIP13/AURKB/CDC20	4	BP
GO:2000816	negative regulation of mitotic sister chromatid separation	4/18	32/17910	2.52292846705733e-08	4.09275062433744e-07	2.28981577828829e-07	CENPF/TRIP13/AURKB/CDC20	4	BP							GO:2000816	negative regulation of mitotic sister chromatid separation	4/18	32/17910	2.52292846705733e-08	4.09275062433744e-07	2.28981577828829e-07	CENPF/TRIP13/AURKB/CDC20	4	BP
GO:1902100	negative regulation of metaphase/anaphase transition of cell cycle	4/18	33/17910	2.86912184846055e-08	4.45629563697064e-07	2.49321226697132e-07	CENPF/TRIP13/AURKB/CDC20	4	BP							GO:1902100	negative regulation of metaphase/anaphase transition of cell cycle	4/18	33/17910	2.86912184846055e-08	4.45629563697064e-07	2.49321226697132e-07	CENPF/TRIP13/AURKB/CDC20	4	BP
GO:1905819	negative regulation of chromosome separation	4/18	33/17910	2.86912184846055e-08	4.45629563697064e-07	2.49321226697132e-07	CENPF/TRIP13/AURKB/CDC20	4	BP							GO:1905819	negative regulation of chromosome separation	4/18	33/17910	2.86912184846055e-08	4.45629563697064e-07	2.49321226697132e-07	CENPF/TRIP13/AURKB/CDC20	4	BP
GO:0051256	mitotic spindle midzone assembly	3/18	7/17910	2.97579988750086e-08	4.52569566224089e-07	2.53204025515424e-07	KIF23/KIF4A/AURKB	3	BP							GO:0051256	mitotic spindle midzone assembly	3/18	7/17910	2.97579988750086e-08	4.52569566224089e-07	2.53204025515424e-07	KIF23/KIF4A/AURKB	3	BP
GO:0030496	midbody	6/18	171/18675	9.147793854973e-09	4.87466554429791e-07	2.10511872358344e-07	CENPF/KIF23/KIF4A/AURKA/AURKB/BIRC5	6	CC							GO:0030496	midbody	6/18	171/18675	9.147793854973e-09	4.87466554429791e-07	2.10511872358344e-07	CENPF/KIF23/KIF4A/AURKA/AURKB/BIRC5	6	CC
GO:0005819	spindle	7/18	326/18675	1.24991424212767e-08	4.87466554429791e-07	2.10511872358344e-07	CENPF/KIF23/KIF4A/AURKA/AURKB/CDC20/DLGAP5	7	CC							GO:0005819	spindle	7/18	326/18675	1.24991424212767e-08	4.87466554429791e-07	2.10511872358344e-07	CENPF/KIF23/KIF4A/AURKA/AURKB/CDC20/DLGAP5	7	CC
GO:0033048	negative regulation of mitotic sister chromatid segregation	4/18	35/17910	3.6666479715327e-08	5.46255718207933e-07	3.05619637584251e-07	CENPF/TRIP13/AURKB/CDC20	4	BP							GO:0033048	negative regulation of mitotic sister chromatid segregation	4/18	35/17910	3.6666479715327e-08	5.46255718207933e-07	3.05619637584251e-07	CENPF/TRIP13/AURKB/CDC20	4	BP
GO:0044430	cytoskeletal part	11/18	1543/18675	2.18405765839995e-08	6.38836865081984e-07	2.75880967376835e-07	CENPF/KIF23/KIF4A/TUBA1C/AURKA/AURKB/BIRC5/CDC20/DLGAP5/DTL/GTSE1	11	CC							GO:0044430	cytoskeletal part	11/18	1543/18675	2.18405765839995e-08	6.38836865081984e-07	2.75880967376835e-07	CENPF/KIF23/KIF4A/TUBA1C/AURKA/AURKB/BIRC5/CDC20/DLGAP5/DTL/GTSE1	11	CC
GO:0033046	negative regulation of sister chromatid segregation	4/18	37/17910	4.61918877637373e-08	6.74401561350564e-07	3.77314788470107e-07	CENPF/TRIP13/AURKB/CDC20	4	BP							GO:0033046	negative regulation of sister chromatid segregation	4/18	37/17910	4.61918877637373e-08	6.74401561350564e-07	3.77314788470107e-07	CENPF/TRIP13/AURKB/CDC20	4	BP
GO:0051985	negative regulation of chromosome segregation	4/18	38/17910	5.15939141724985e-08	7.38501124429881e-07	4.13177269327749e-07	CENPF/TRIP13/AURKB/CDC20	4	BP							GO:0051985	negative regulation of chromosome segregation	4/18	38/17910	5.15939141724985e-08	7.38501124429881e-07	4.13177269327749e-07	CENPF/TRIP13/AURKB/CDC20	4	BP
GO:0045786	negative regulation of cell cycle	8/18	613/17910	5.81409398001207e-08	8.16209347194002e-07	4.56653535272203e-07	CENPF/TRIP13/AURKA/AURKB/BUB1/CDC20/DTL/GTSE1	8	BP							GO:0045786	negative regulation of cell cycle	8/18	613/17910	5.81409398001207e-08	8.16209347194002e-07	4.56653535272203e-07	CENPF/TRIP13/AURKA/AURKB/BUB1/CDC20/DTL/GTSE1	8	BP
GO:0007017	microtubule-based process	8/18	627/17910	6.92280941418742e-08	9.53519032520155e-07	5.33475680775516e-07	KIF23/KIF4A/TUBA1C/AURKA/AURKB/CDC20/DLGAP5/GTSE1	8	BP							GO:0007017	microtubule-based process	8/18	627/17910	6.92280941418742e-08	9.53519032520155e-07	5.33475680775516e-07	KIF23/KIF4A/TUBA1C/AURKA/AURKB/CDC20/DLGAP5/GTSE1	8	BP
GO:0000022	mitotic spindle elongation	3/18	9/17910	7.13294867420686e-08	9.64268987439076e-07	5.39490075164184e-07	KIF23/KIF4A/AURKB	3	BP							GO:0000022	mitotic spindle elongation	3/18	9/17910	7.13294867420686e-08	9.64268987439076e-07	5.39490075164184e-07	KIF23/KIF4A/AURKB	3	BP
GO:1901991	negative regulation of mitotic cell cycle phase transition	6/18	235/17910	7.78999056649367e-08	1.03394420246189e-06	5.78472026755893e-07	CENPF/TRIP13/AURKA/AURKB/CDC20/GTSE1	6	BP							GO:1901991	negative regulation of mitotic cell cycle phase transition	6/18	235/17910	7.78999056649367e-08	1.03394420246189e-06	5.78472026755893e-07	CENPF/TRIP13/AURKA/AURKB/CDC20/GTSE1	6	BP
GO:0051231	spindle elongation	3/18	10/17910	1.01835247924887e-07	1.30420580675733e-06	7.29678230745269e-07	KIF23/KIF4A/AURKB	3	BP							GO:0051231	spindle elongation	3/18	10/17910	1.01835247924887e-07	1.30420580675733e-06	7.29678230745269e-07	KIF23/KIF4A/AURKB	3	BP
GO:0051255	spindle midzone assembly	3/18	10/17910	1.01835247924887e-07	1.30420580675733e-06	7.29678230745269e-07	KIF23/KIF4A/AURKB	3	BP							GO:0051255	spindle midzone assembly	3/18	10/17910	1.01835247924887e-07	1.30420580675733e-06	7.29678230745269e-07	KIF23/KIF4A/AURKB	3	BP
GO:0045839	negative regulation of mitotic nuclear division	4/18	45/17910	1.03686447528471e-07	1.30501908096179e-06	7.30133242124258e-07	CENPF/TRIP13/AURKB/CDC20	4	BP							GO:0045839	negative regulation of mitotic nuclear division	4/18	45/17910	1.03686447528471e-07	1.30501908096179e-06	7.30133242124258e-07	CENPF/TRIP13/AURKB/CDC20	4	BP
GO:0005654	nucleoplasm	14/18	3427/18675	6.96235607685768e-08	1.6291913219847e-06	7.03564403556145e-07	CCNE2/CENPF/KIF23/KIF4A/ASF1B/AURKA/AURKB/BIRC5/BUB1/CDC20/CDC25A/DTL/EXO1/GTSE1	14	CC							GO:0005654	nucleoplasm	14/18	3427/18675	6.96235607685768e-08	1.6291913219847e-06	7.03564403556145e-07	CCNE2/CENPF/KIF23/KIF4A/ASF1B/AURKA/AURKB/BIRC5/BUB1/CDC20/CDC25A/DTL/EXO1/GTSE1	14	CC
GO:0044839	cell cycle G2/M phase transition	6/18	257/17910	1.32311743858337e-07	1.6370775087557e-06	9.15913588171899e-07	CENPF/AURKA/AURKB/CDC25A/DTL/GTSE1	6	BP							GO:0044839	cell cycle G2/M phase transition	6/18	257/17910	1.32311743858337e-07	1.6370775087557e-06	9.15913588171899e-07	CENPF/AURKA/AURKB/CDC25A/DTL/GTSE1	6	BP
GO:0051784	negative regulation of nuclear division	4/18	52/17910	1.87574950744893e-07	2.24474941055363e-06	1.25589440705812e-06	CENPF/TRIP13/AURKB/CDC20	4	BP							GO:0051784	negative regulation of nuclear division	4/18	52/17910	1.87574950744893e-07	2.24474941055363e-06	1.25589440705812e-06	CENPF/TRIP13/AURKB/CDC20	4	BP
GO:0090307	mitotic spindle assembly	4/18	52/17910	1.87574950744893e-07	2.24474941055363e-06	1.25589440705812e-06	KIF23/KIF4A/AURKB/CDC20	4	BP							GO:0090307	mitotic spindle assembly	4/18	52/17910	1.87574950744893e-07	2.24474941055363e-06	1.25589440705812e-06	KIF23/KIF4A/AURKB/CDC20	4	BP
GO:0090068	positive regulation of cell cycle process	6/18	283/17910	2.33629251457284e-07	2.75079602522286e-06	1.53901781944696e-06	KIF23/AURKA/AURKB/DLGAP5/DTL/GTSE1	6	BP							GO:0090068	positive regulation of cell cycle process	6/18	283/17910	2.33629251457284e-07	2.75079602522286e-06	1.53901781944696e-06	KIF23/AURKA/AURKB/DLGAP5/DTL/GTSE1	6	BP
GO:0007051	spindle organization	5/18	147/17910	2.73511882140644e-07	3.16926466607413e-06	1.77314302874804e-06	KIF23/KIF4A/AURKA/AURKB/CDC20	5	BP							GO:0007051	spindle organization	5/18	147/17910	2.73511882140644e-07	3.16926466607413e-06	1.77314302874804e-06	KIF23/KIF4A/AURKA/AURKB/CDC20	5	BP
GO:0033044	regulation of chromosome organization	6/18	311/17910	4.06823843964658e-07	4.64033447022188e-06	2.59617847793236e-06	CENPF/TRIP13/AURKB/BUB1/CDC20/DLGAP5	6	BP							GO:0033044	regulation of chromosome organization	6/18	311/17910	4.06823843964658e-07	4.64033447022188e-06	2.59617847793236e-06	CENPF/TRIP13/AURKB/BUB1/CDC20/DLGAP5	6	BP
GO:0005856	cytoskeleton	11/18	2041/18675	3.96436618038829e-07	7.73051405175717e-06	3.33841362559014e-06	CENPF/KIF23/KIF4A/TUBA1C/AURKA/AURKB/BIRC5/CDC20/DLGAP5/DTL/GTSE1	11	CC							GO:0005856	cytoskeleton	11/18	2041/18675	3.96436618038829e-07	7.73051405175717e-06	3.33841362559014e-06	CENPF/KIF23/KIF4A/TUBA1C/AURKA/AURKB/BIRC5/CDC20/DLGAP5/DTL/GTSE1	11	CC
GO:0045787	positive regulation of cell cycle	6/18	373/17910	1.17747482468968e-06	1.32239480311303e-05	7.39854626687607e-06	KIF23/AURKA/AURKB/DLGAP5/DTL/GTSE1	6	BP							GO:0045787	positive regulation of cell cycle	6/18	373/17910	1.17747482468968e-06	1.32239480311303e-05	7.39854626687607e-06	KIF23/AURKA/AURKB/DLGAP5/DTL/GTSE1	6	BP
GO:1902749	regulation of cell cycle G2/M phase transition	5/18	202/17910	1.32070017348308e-06	1.46077443430705e-05	8.17275386461622e-06	CENPF/AURKA/AURKB/DTL/GTSE1	5	BP							GO:1902749	regulation of cell cycle G2/M phase transition	5/18	202/17910	1.32070017348308e-06	1.46077443430705e-05	8.17275386461622e-06	CENPF/AURKA/AURKB/DTL/GTSE1	5	BP
GO:0007052	mitotic spindle organization	4/18	95/17910	2.14712179902146e-06	2.33940136311293e-05	1.30885036609635e-05	KIF23/KIF4A/AURKB/CDC20	4	BP							GO:0007052	mitotic spindle organization	4/18	95/17910	2.14712179902146e-06	2.33940136311293e-05	1.30885036609635e-05	KIF23/KIF4A/AURKB/CDC20	4	BP
GO:0000086	G2/M transition of mitotic cell cycle	5/18	238/17910	2.95600665521813e-06	3.17336008574887e-05	1.77543433780903e-05	CENPF/AURKA/AURKB/CDC25A/DTL	5	BP							GO:0000086	G2/M transition of mitotic cell cycle	5/18	238/17910	2.95600665521813e-06	3.17336008574887e-05	1.77543433780903e-05	CENPF/AURKA/AURKB/CDC25A/DTL	5	BP
GO:0031981	nuclear lumen	14/18	4454/18675	2.13063443387985e-06	3.56120326805633e-05	1.53790154625914e-05	CCNE2/CENPF/KIF23/KIF4A/ASF1B/AURKA/AURKB/BIRC5/BUB1/CDC20/CDC25A/DTL/EXO1/GTSE1	14	CC							GO:0031981	nuclear lumen	14/18	4454/18675	2.13063443387985e-06	3.56120326805633e-05	1.53790154625914e-05	CCNE2/CENPF/KIF23/KIF4A/ASF1B/AURKA/AURKB/BIRC5/BUB1/CDC20/CDC25A/DTL/EXO1/GTSE1	14	CC
GO:0000779	condensed chromosome, centromeric region	4/18	110/18675	3.27185482113538e-06	4.76480716866508e-05	2.05767651008479e-05	CENPF/AURKB/BIRC5/BUB1	4	CC							GO:0000779	condensed chromosome, centromeric region	4/18	110/18675	3.27185482113538e-06	4.76480716866508e-05	2.05767651008479e-05	CENPF/AURKB/BIRC5/BUB1	4	CC
GO:0005813	centrosome	6/18	473/18675	3.66523628358852e-06	4.76480716866508e-05	2.05767651008479e-05	CENPF/KIF23/AURKA/CDC20/DLGAP5/DTL	6	CC							GO:0005813	centrosome	6/18	473/18675	3.66523628358852e-06	4.76480716866508e-05	2.05767651008479e-05	CENPF/KIF23/AURKA/CDC20/DLGAP5/DTL	6	CC
GO:1902850	microtubule cytoskeleton organization involved in mitosis	4/18	116/17910	4.76601687974989e-06	5.04230771335858e-05	2.82107482737293e-05	KIF23/KIF4A/AURKB/CDC20	4	BP							GO:1902850	microtubule cytoskeleton organization involved in mitosis	4/18	116/17910	4.76601687974989e-06	5.04230771335858e-05	2.82107482737293e-05	KIF23/KIF4A/AURKB/CDC20	4	BP
GO:0032133	chromosome passenger complex	2/18	4/18675	5.25870016889101e-06	5.93060220758963e-05	2.56112376036259e-05	AURKB/BIRC5	2	CC							GO:0032133	chromosome passenger complex	2/18	4/18675	5.25870016889101e-06	5.93060220758963e-05	2.56112376036259e-05	AURKB/BIRC5	2	CC
GO:0044428	nuclear part	14/18	4801/18675	5.5757798532894e-06	5.93060220758963e-05	2.56112376036259e-05	CCNE2/CENPF/KIF23/KIF4A/ASF1B/AURKA/AURKB/BIRC5/BUB1/CDC20/CDC25A/DTL/EXO1/GTSE1	14	CC							GO:0044428	nuclear part	14/18	4801/18675	5.5757798532894e-06	5.93060220758963e-05	2.56112376036259e-05	CCNE2/CENPF/KIF23/KIF4A/ASF1B/AURKA/AURKB/BIRC5/BUB1/CDC20/CDC25A/DTL/EXO1/GTSE1	14	CC
GO:0000776	kinetochore	4/18	131/18675	6.55687459784545e-06	6.39295273289932e-05	2.76078930435598e-05	CENPF/AURKB/BIRC5/BUB1	4	CC							GO:0000776	kinetochore	4/18	131/18675	6.55687459784545e-06	6.39295273289932e-05	2.76078930435598e-05	CENPF/AURKB/BIRC5/BUB1	4	CC
GO:0005829	cytosol	14/18	4909/18675	7.4034675998313e-06	6.66312083984817e-05	2.87746109143241e-05	CCNE2/CENPF/KIF23/KIF4A/AURKA/AURKB/BIRC5/BUB1/CDC20/CDC25A/CDCA3/DLGAP5/DTL/GTSE1	14	CC							GO:0005829	cytosol	14/18	4909/18675	7.4034675998313e-06	6.66312083984817e-05	2.87746109143241e-05	CCNE2/CENPF/KIF23/KIF4A/AURKA/AURKB/BIRC5/BUB1/CDC20/CDC25A/CDCA3/DLGAP5/DTL/GTSE1	14	CC
GO:2001251	negative regulation of chromosome organization	4/18	125/17910	6.41448499482357e-06	6.68939149460172e-05	3.74258673382187e-05	CENPF/TRIP13/AURKB/CDC20	4	BP							GO:2001251	negative regulation of chromosome organization	4/18	125/17910	6.41448499482357e-06	6.68939149460172e-05	3.74258673382187e-05	CENPF/TRIP13/AURKB/CDC20	4	BP
GO:0000922	spindle pole	4/18	152/18675	1.18111904106356e-05	9.87078055745972e-05	4.26268526098126e-05	CENPF/AURKA/CDC20/DLGAP5	4	CC							GO:0000922	spindle pole	4/18	152/18675	1.18111904106356e-05	9.87078055745972e-05	4.26268526098126e-05	CENPF/AURKA/CDC20/DLGAP5	4	CC
GO:0006996	organelle organization	12/18	3372/17910	1.16165874071761e-05	0.000119438152214627	6.68233641806422e-05	CCNE2/CENPF/KIF23/KIF4A/TRIP13/ASF1B/AURKA/AURKB/BUB1/CDC20/DLGAP5/EXO1	12	BP							GO:0006996	organelle organization	12/18	3372/17910	1.16165874071761e-05	0.000119438152214627	6.68233641806422e-05	CCNE2/CENPF/KIF23/KIF4A/TRIP13/ASF1B/AURKA/AURKB/BUB1/CDC20/DLGAP5/EXO1	12	BP
GO:0043232	intracellular non-membrane-bounded organelle	13/18	4464/18675	2.01976958495594e-05	0.00014288965467448	6.17067334626634e-05	CENPF/KIF23/KIF4A/TUBA1C/ASF1B/AURKA/AURKB/BIRC5/BUB1/CDC20/DLGAP5/DTL/GTSE1	13	CC							GO:0043232	intracellular non-membrane-bounded organelle	13/18	4464/18675	2.01976958495594e-05	0.00014288965467448	6.17067334626634e-05	CENPF/KIF23/KIF4A/TUBA1C/ASF1B/AURKA/AURKB/BIRC5/BUB1/CDC20/DLGAP5/DTL/GTSE1	13	CC
GO:0043228	non-membrane-bounded organelle	13/18	4473/18675	2.06751492756782e-05	0.00014288965467448	6.17067334626634e-05	CENPF/KIF23/KIF4A/TUBA1C/ASF1B/AURKA/AURKB/BIRC5/BUB1/CDC20/DLGAP5/DTL/GTSE1	13	CC							GO:0043228	non-membrane-bounded organelle	13/18	4473/18675	2.06751492756782e-05	0.00014288965467448	6.17067334626634e-05	CENPF/KIF23/KIF4A/TUBA1C/ASF1B/AURKA/AURKB/BIRC5/BUB1/CDC20/DLGAP5/DTL/GTSE1	13	CC
GO:0005694	chromosome	7/18	982/18675	2.07617446962919e-05	0.00014288965467448	6.17067334626634e-05	CENPF/KIF4A/ASF1B/AURKB/BIRC5/BUB1/DTL	7	CC							GO:0005694	chromosome	7/18	982/18675	2.07617446962919e-05	0.00014288965467448	6.17067334626634e-05	CENPF/KIF4A/ASF1B/AURKB/BIRC5/BUB1/DTL	7	CC
GO:0000775	chromosome, centromeric region	4/18	185/18675	2.5590626628955e-05	0.000166339073088208	7.18333379058387e-05	CENPF/AURKB/BIRC5/BUB1	4	CC							GO:0000775	chromosome, centromeric region	4/18	185/18675	2.5590626628955e-05	0.000166339073088208	7.18333379058387e-05	CENPF/AURKB/BIRC5/BUB1	4	CC
GO:0005815	microtubule organizing center	6/18	681/18675	2.93266112622991e-05	0.000180590185141526	7.79876642986347e-05	CENPF/KIF23/AURKA/CDC20/DLGAP5/DTL	6	CC							GO:0005815	microtubule organizing center	6/18	681/18675	2.93266112622991e-05	0.000180590185141526	7.79876642986347e-05	CENPF/KIF23/AURKA/CDC20/DLGAP5/DTL	6	CC
GO:0000793	condensed chromosome	4/18	199/18675	3.40524237436776e-05	0.000199206678900514	8.60271757735012e-05	CENPF/AURKB/BIRC5/BUB1	4	CC							GO:0000793	condensed chromosome	4/18	199/18675	3.40524237436776e-05	0.000199206678900514	8.60271757735012e-05	CENPF/AURKB/BIRC5/BUB1	4	CC
GO:0007144	female meiosis I	2/18	7/17910	1.99746918808433e-05	0.000202521181569662	0.000113306731721743	TRIP13/AURKA	2	BP							GO:0007144	female meiosis I	2/18	7/17910	1.99746918808433e-05	0.000202521181569662	0.000113306731721743	TRIP13/AURKA	2	BP
GO:0010389	regulation of G2/M transition of mitotic cell cycle	4/18	185/17910	3.01109254692058e-05	0.000301109254692058	0.000168464875011562	CENPF/AURKA/AURKB/DTL	4	BP							GO:0010389	regulation of G2/M transition of mitotic cell cycle	4/18	185/17910	3.01109254692058e-05	0.000301109254692058	0.000168464875011562	CENPF/AURKA/AURKB/DTL	4	BP
GO:0000940	condensed chromosome outer kinetochore	2/18	12/18675	5.7581927349704e-05	0.000320813595234065	0.000138542983097032	CENPF/BUB1	2	CC							GO:0000940	condensed chromosome outer kinetochore	2/18	12/18675	5.7581927349704e-05	0.000320813595234065	0.000138542983097032	CENPF/BUB1	2	CC
GO:0031616	spindle pole centrosome	2/18	13/18675	6.80125075744326e-05	0.000361702881191301	0.000156200974333625	AURKA/DLGAP5	2	CC							GO:0031616	spindle pole centrosome	2/18	13/18675	6.80125075744326e-05	0.000361702881191301	0.000156200974333625	AURKA/DLGAP5	2	CC
GO:0070925	organelle assembly	6/18	699/17910	4.29354099838554e-05	0.000421344645679179	0.000235734279053383	CENPF/KIF23/KIF4A/AURKA/AURKB/CDC20	6	BP							GO:0070925	organelle assembly	6/18	699/17910	4.29354099838554e-05	0.000421344645679179	0.000235734279053383	CENPF/KIF23/KIF4A/AURKA/AURKB/CDC20	6	BP
GO:0051321	meiotic cell cycle	4/18	203/17910	4.32888334601896e-05	0.000421344645679179	0.000235734279053383	TRIP13/AURKA/CDC20/EXO1	4	BP							GO:0051321	meiotic cell cycle	4/18	203/17910	4.32888334601896e-05	0.000421344645679179	0.000235734279053383	TRIP13/AURKA/CDC20/EXO1	4	BP
GO:0045120	pronucleus	2/18	15/18675	9.1450767128616e-05	0.00046520607626296	0.00020089871039696	CENPF/AURKA	2	CC							GO:0045120	pronucleus	2/18	15/18675	9.1450767128616e-05	0.00046520607626296	0.00020089871039696	CENPF/AURKA	2	CC
GO:0072401	signal transduction involved in DNA integrity checkpoint	3/18	73/17910	5.07321349598394e-05	0.000480966993775101	0.000269091843669415	AURKA/DTL/GTSE1	3	BP							GO:0072401	signal transduction involved in DNA integrity checkpoint	3/18	73/17910	5.07321349598394e-05	0.000480966993775101	0.000269091843669415	AURKA/DTL/GTSE1	3	BP
GO:0072422	signal transduction involved in DNA damage checkpoint	3/18	73/17910	5.07321349598394e-05	0.000480966993775101	0.000269091843669415	AURKA/DTL/GTSE1	3	BP							GO:0072422	signal transduction involved in DNA damage checkpoint	3/18	73/17910	5.07321349598394e-05	0.000480966993775101	0.000269091843669415	AURKA/DTL/GTSE1	3	BP
GO:0035404	histone-serine phosphorylation	2/18	11/17910	5.21901647616017e-05	0.00048829165715733	0.000273189852886869	AURKA/AURKB	2	BP							GO:0035404	histone-serine phosphorylation	2/18	11/17910	5.21901647616017e-05	0.00048829165715733	0.000273189852886869	AURKA/AURKB	2	BP
GO:0072395	signal transduction involved in cell cycle checkpoint	3/18	74/17910	5.28425218019576e-05	0.00048829165715733	0.000273189852886869	AURKA/DTL/GTSE1	3	BP							GO:0072395	signal transduction involved in cell cycle checkpoint	3/18	74/17910	5.28425218019576e-05	0.00048829165715733	0.000273189852886869	AURKA/DTL/GTSE1	3	BP
GO:0072686	mitotic spindle	3/18	97/18675	0.000104746146842352	0.000510637465856466	0.000220518203878636	KIF23/AURKA/AURKB	3	CC							GO:0072686	mitotic spindle	3/18	97/18675	0.000104746146842352	0.000510637465856466	0.000220518203878636	KIF23/AURKA/AURKB	3	CC
GO:0000777	condensed chromosome kinetochore	3/18	100/18675	0.000114669352470621	0.00053241879290108	0.000229924444977524	CENPF/BIRC5/BUB1	3	CC							GO:0000777	condensed chromosome kinetochore	3/18	100/18675	0.000114669352470621	0.00053241879290108	0.000229924444977524	CENPF/BIRC5/BUB1	3	CC
GO:0000780	condensed nuclear chromosome, centromeric region	2/18	17/18675	0.000118315287311351	0.00053241879290108	0.000229924444977524	AURKB/BUB1	2	CC							GO:0000780	condensed nuclear chromosome, centromeric region	2/18	17/18675	0.000118315287311351	0.00053241879290108	0.000229924444977524	AURKB/BUB1	2	CC
GO:0031145	anaphase-promoting complex-dependent catabolic process	3/18	81/17910	6.92448879998233e-05	0.000631859602998388	0.000353513375578046	AURKA/AURKB/CDC20	3	BP							GO:0031145	anaphase-promoting complex-dependent catabolic process	3/18	81/17910	6.92448879998233e-05	0.000631859602998388	0.000353513375578046	AURKA/AURKB/CDC20	3	BP
GO:0000226	microtubule cytoskeleton organization	5/18	460/17910	7.1046605819875e-05	0.000639455764699986	0.000357763282917945	KIF23/KIF4A/AURKA/AURKB/CDC20	5	BP							GO:0000226	microtubule cytoskeleton organization	5/18	460/17910	7.1046605819875e-05	0.000639455764699986	0.000357763282917945	KIF23/KIF4A/AURKA/AURKB/CDC20	5	BP
GO:0061640	cytoskeleton-dependent cytokinesis	3/18	82/17910	7.18292776786286e-05	0.000639455764699986	0.000357763282917945	KIF23/KIF4A/AURKB	3	BP							GO:0061640	cytoskeleton-dependent cytokinesis	3/18	82/17910	7.18292776786286e-05	0.000639455764699986	0.000357763282917945	KIF23/KIF4A/AURKB	3	BP
GO:0043073	germ cell nucleus	2/18	19/18675	0.000148594247343925	0.000643908405157008	0.000278071106140678	TRIP13/AURKA	2	CC							GO:0043073	germ cell nucleus	2/18	19/18675	0.000148594247343925	0.000643908405157008	0.000278071106140678	TRIP13/AURKA	2	CC
GO:0033043	regulation of organelle organization	7/18	1147/17910	7.37885036920099e-05	0.000648983225242978	0.000363093715060239	CENPF/TRIP13/AURKA/AURKB/BUB1/CDC20/DLGAP5	7	BP							GO:0033043	regulation of organelle organization	7/18	1147/17910	7.37885036920099e-05	0.000648983225242978	0.000363093715060239	CENPF/TRIP13/AURKA/AURKB/BUB1/CDC20/DLGAP5	7	BP
GO:1902750	negative regulation of cell cycle G2/M phase transition	3/18	97/17910	0.000118463474731584	0.00102950400659591	0.00057598782200319	AURKA/AURKB/DTL	3	BP							GO:1902750	negative regulation of cell cycle G2/M phase transition	3/18	97/17910	0.000118463474731584	0.00102950400659591	0.00057598782200319	AURKA/AURKB/DTL	3	BP
GO:0072331	signal transduction by p53 class mediator	4/18	264/17910	0.000119992197184452	0.00103052122287824	0.000576556935078236	AURKA/AURKB/EXO1/GTSE1	4	BP							GO:0072331	signal transduction by p53 class mediator	4/18	264/17910	0.000119992197184452	0.00103052122287824	0.000576556935078236	AURKA/AURKB/EXO1/GTSE1	4	BP
GO:0098687	chromosomal region	4/18	337/18675	0.000260931423664686	0.00109032059174172	0.000470853696838531	CENPF/AURKB/BIRC5/BUB1	4	CC							GO:0098687	chromosomal region	4/18	337/18675	0.000260931423664686	0.00109032059174172	0.000470853696838531	CENPF/AURKB/BIRC5/BUB1	4	CC
GO:0000082	G1/S transition of mitotic cell cycle	4/18	269/17910	0.000128992903877904	0.00109493976547523	0.000612597878881602	CCNE2/AURKA/CDC25A/GTSE1	4	BP							GO:0000082	G1/S transition of mitotic cell cycle	4/18	269/17910	0.000128992903877904	0.00109493976547523	0.000612597878881602	CCNE2/AURKA/CDC25A/GTSE1	4	BP
GO:0005874	microtubule	4/18	357/18675	0.000324990304664791	0.00131116778088899	0.000566226302138293	KIF4A/TUBA1C/AURKA/GTSE1	4	CC							GO:0005874	microtubule	4/18	357/18675	0.000324990304664791	0.00131116778088899	0.000566226302138293	KIF4A/TUBA1C/AURKA/GTSE1	4	CC
GO:0044843	cell cycle G1/S phase transition	4/18	288/17910	0.000167718261375712	0.00140729115866977	0.000787352515593181	CCNE2/AURKA/CDC25A/GTSE1	4	BP							GO:0044843	cell cycle G1/S phase transition	4/18	288/17910	0.000167718261375712	0.00140729115866977	0.000787352515593181	CCNE2/AURKA/CDC25A/GTSE1	4	BP
GO:0006259	DNA metabolic process	6/18	963/17910	0.000252569451841092	0.00209517840731815	0.00117221228844909	CCNE2/CENPF/TRIP13/AURKB/DTL/EXO1	6	BP							GO:0006259	DNA metabolic process	6/18	963/17910	0.000252569451841092	0.00209517840731815	0.00117221228844909	CCNE2/CENPF/TRIP13/AURKB/DTL/EXO1	6	BP
GO:0001556	oocyte maturation	2/18	25/17910	0.000282310122034307	0.00231557740544993	0.00129552131696406	TRIP13/AURKA	2	BP							GO:0001556	oocyte maturation	2/18	25/17910	0.000282310122034307	0.00231557740544993	0.00129552131696406	TRIP13/AURKA	2	BP
GO:0042770	signal transduction in response to DNA damage	3/18	131/17910	0.000287965496268395	0.0023357201363992	0.00130679079008347	AURKA/DTL/GTSE1	3	BP							GO:0042770	signal transduction in response to DNA damage	3/18	131/17910	0.000287965496268395	0.0023357201363992	0.00130679079008347	AURKA/DTL/GTSE1	3	BP
GO:0000077	DNA damage checkpoint	3/18	133/17910	0.000301083503758844	0.00241528524993358	0.00135130595093617	AURKA/DTL/GTSE1	3	BP							GO:0000077	DNA damage checkpoint	3/18	133/17910	0.000301083503758844	0.00241528524993358	0.00135130595093617	AURKA/DTL/GTSE1	3	BP
GO:0009411	response to UV	3/18	137/17910	0.000328466685830626	0.00260631174626475	0.00145818162588424	AURKB/CDC25A/DTL	3	BP							GO:0009411	response to UV	3/18	137/17910	0.000328466685830626	0.00260631174626475	0.00145818162588424	AURKB/CDC25A/DTL	3	BP
GO:0051641	cellular localization	9/18	2548/17910	0.000338165016931247	0.0026544135737614	0.00148509367933586	CCNE2/CENPF/KIF23/KIF4A/TUBA1C/AURKA/AURKB/DLGAP5/GTSE1	9	BP							GO:0051641	cellular localization	9/18	2548/17910	0.000338165016931247	0.0026544135737614	0.00148509367933586	CCNE2/CENPF/KIF23/KIF4A/TUBA1C/AURKA/AURKB/DLGAP5/GTSE1	9	BP
GO:0031570	DNA integrity checkpoint	3/18	141/17910	0.000357411085628079	0.00277293266340076	0.00155140284556524	AURKA/DTL/GTSE1	3	BP							GO:0031570	DNA integrity checkpoint	3/18	141/17910	0.000357411085628079	0.00277293266340076	0.00155140284556524	AURKA/DTL/GTSE1	3	BP
GO:0010639	negative regulation of organelle organization	4/18	352/17910	0.000360861100031605	0.00277293266340076	0.00155140284556524	CENPF/TRIP13/AURKB/CDC20	4	BP							GO:0010639	negative regulation of organelle organization	4/18	352/17910	0.000360861100031605	0.00277293266340076	0.00155140284556524	CENPF/TRIP13/AURKB/CDC20	4	BP
GO:0140013	meiotic nuclear division	3/18	142/17910	0.000364895542672708	0.00277472652240705	0.00155240647540582	TRIP13/AURKA/CDC20	3	BP							GO:0140013	meiotic nuclear division	3/18	142/17910	0.000364895542672708	0.00277472652240705	0.00155240647540582	TRIP13/AURKA/CDC20	3	BP
GO:0000910	cytokinesis	3/18	147/17910	0.000403837115604311	0.00303918654011492	0.00170036680254447	KIF23/KIF4A/AURKB	3	BP							GO:0000910	cytokinesis	3/18	147/17910	0.000403837115604311	0.00303918654011492	0.00170036680254447	KIF23/KIF4A/AURKB	3	BP
GO:0007143	female meiotic nuclear division	2/18	30/17910	0.000408133008859066	0.00304017445374611	0.00170091952134606	TRIP13/AURKA	2	BP							GO:0007143	female meiotic nuclear division	2/18	30/17910	0.000408133008859066	0.00304017445374611	0.00170091952134606	TRIP13/AURKA	2	BP
GO:1903046	meiotic cell cycle process	3/18	151/17910	0.000436848135056925	0.00322120342011672	0.00180220176929385	TRIP13/AURKA/CDC20	3	BP							GO:1903046	meiotic cell cycle process	3/18	151/17910	0.000436848135056925	0.00322120342011672	0.00180220176929385	TRIP13/AURKA/CDC20	3	BP
GO:0000723	telomere maintenance	3/18	154/17910	0.000462714093130352	0.00331158125475644	0.0018527664410173	CCNE2/AURKB/EXO1	3	BP							GO:0000723	telomere maintenance	3/18	154/17910	0.000462714093130352	0.00331158125475644	0.0018527664410173	CCNE2/AURKB/EXO1	3	BP
GO:0030705	cytoskeleton-dependent intracellular transport	3/18	154/17910	0.000462714093130352	0.00331158125475644	0.0018527664410173	KIF23/KIF4A/TUBA1C	3	BP							GO:0030705	cytoskeleton-dependent intracellular transport	3/18	154/17910	0.000462714093130352	0.00331158125475644	0.0018527664410173	KIF23/KIF4A/TUBA1C	3	BP
GO:0045931	positive regulation of mitotic cell cycle	3/18	154/17910	0.000462714093130352	0.00331158125475644	0.0018527664410173	AURKA/DLGAP5/DTL	3	BP							GO:0045931	positive regulation of mitotic cell cycle	3/18	154/17910	0.000462714093130352	0.00331158125475644	0.0018527664410173	AURKA/DLGAP5/DTL	3	BP
GO:0044427	chromosomal part	5/18	855/18675	0.00103435690222163	0.00403399191866434	0.00174207478268905	CENPF/ASF1B/AURKB/BIRC5/BUB1	5	CC							GO:0044427	chromosomal part	5/18	855/18675	0.00103435690222163	0.00403399191866434	0.00174207478268905	CENPF/ASF1B/AURKB/BIRC5/BUB1	5	CC
GO:0032200	telomere organization	3/18	167/17910	0.000586160244666397	0.00415433959812107	0.00232427363240227	CCNE2/AURKB/EXO1	3	BP							GO:0032200	telomere organization	3/18	167/17910	0.000586160244666397	0.00415433959812107	0.00232427363240227	CCNE2/AURKB/EXO1	3	BP
GO:0032467	positive regulation of cytokinesis	2/18	37/17910	0.000622267659532665	0.00432624182341758	0.00242044964309448	KIF23/AURKB	2	BP							GO:0032467	positive regulation of cytokinesis	2/18	37/17910	0.000622267659532665	0.00432624182341758	0.00242044964309448	KIF23/AURKB	2	BP
GO:0032506	cytokinetic process	2/18	37/17910	0.000622267659532665	0.00432624182341758	0.00242044964309448	KIF23/AURKB	2	BP							GO:0032506	cytokinetic process	2/18	37/17910	0.000622267659532665	0.00432624182341758	0.00242044964309448	KIF23/AURKB	2	BP
GO:0022607	cellular component assembly	9/18	2765/17910	0.000631874641129214	0.00435158950966345	0.00243463118925655	CENPF/KIF23/KIF4A/TRIP13/ASF1B/AURKA/AURKB/CDC20/EXO1	9	BP							GO:0022607	cellular component assembly	9/18	2765/17910	0.000631874641129214	0.00435158950966345	0.00243463118925655	CENPF/KIF23/KIF4A/TRIP13/ASF1B/AURKA/AURKB/CDC20/EXO1	9	BP
GO:0005876	spindle microtubule	2/18	53/18675	0.00117442901780095	0.00443252242202296	0.00191417972341072	KIF4A/AURKA	2	CC							GO:0005876	spindle microtubule	2/18	53/18675	0.00117442901780095	0.00443252242202296	0.00191417972341072	KIF4A/AURKA	2	CC
GO:0000228	nuclear chromosome	4/18	507/18675	0.00121339611091894	0.00443647953054738	0.0019158885961878	ASF1B/AURKB/BIRC5/BUB1	4	CC							GO:0000228	nuclear chromosome	4/18	507/18675	0.00121339611091894	0.00443647953054738	0.0019158885961878	ASF1B/AURKB/BIRC5/BUB1	4	CC
GO:0016572	histone phosphorylation	2/18	38/17910	0.000656447299503101	0.00447856568819872	0.00250567193514219	AURKA/AURKB	2	BP							GO:0016572	histone phosphorylation	2/18	38/17910	0.000656447299503101	0.00447856568819872	0.00250567193514219	AURKA/AURKB	2	BP
GO:1901796	regulation of signal transduction by p53 class mediator	3/18	179/17910	0.000717262288672564	0.00484816176602751	0.00271245387919059	AURKA/AURKB/EXO1	3	BP							GO:1901796	regulation of signal transduction by p53 class mediator	3/18	179/17910	0.000717262288672564	0.00484816176602751	0.00271245387919059	AURKA/AURKB/EXO1	3	BP
GO:0045171	intercellular bridge	2/18	59/18675	0.0014532527963218	0.00515244173241364	0.00222507605178457	KIF23/KIF4A	2	CC							GO:0045171	intercellular bridge	2/18	59/18675	0.0014532527963218	0.00515244173241364	0.00222507605178457	KIF23/KIF4A	2	CC
GO:0071897	DNA biosynthetic process	3/18	192/17910	0.000878963193594407	0.00578875246334468	0.0032386964034286	CENPF/AURKB/DTL	3	BP							GO:0071897	DNA biosynthetic process	3/18	192/17910	0.000878963193594407	0.00578875246334468	0.0032386964034286	CENPF/AURKB/DTL	3	BP
GO:0006974	cellular response to DNA damage stimulus	5/18	791/17910	0.000879006514525571	0.00578875246334468	0.0032386964034286	TRIP13/AURKA/DTL/EXO1/GTSE1	5	BP							GO:0006974	cellular response to DNA damage stimulus	5/18	791/17910	0.000879006514525571	0.00578875246334468	0.0032386964034286	TRIP13/AURKA/DTL/EXO1/GTSE1	5	BP
GO:0048599	oocyte development	2/18	44/17910	0.000880207566344192	0.00578875246334468	0.0032386964034286	TRIP13/AURKA	2	BP							GO:0048599	oocyte development	2/18	44/17910	0.000880207566344192	0.00578875246334468	0.0032386964034286	TRIP13/AURKA	2	BP
GO:0044085	cellular component biogenesis	9/18	2951/17910	0.00103160650380731	0.00672386381945838	0.00376187334095148	CENPF/KIF23/KIF4A/TRIP13/ASF1B/AURKA/AURKB/CDC20/EXO1	9	BP							GO:0044085	cellular component biogenesis	9/18	2951/17910	0.00103160650380731	0.00672386381945838	0.00376187334095148	CENPF/KIF23/KIF4A/TRIP13/ASF1B/AURKA/AURKB/CDC20/EXO1	9	BP
GO:0045840	positive regulation of mitotic nuclear division	2/18	48/17910	0.00104705504543177	0.00676416091296627	0.00378441879485352	AURKA/DLGAP5	2	BP							GO:0045840	positive regulation of mitotic nuclear division	2/18	48/17910	0.00104705504543177	0.00676416091296627	0.00378441879485352	AURKA/DLGAP5	2	BP
GO:0009994	oocyte differentiation	2/18	49/17910	0.0010909613651346	0.00698598067147597	0.00390852271165491	TRIP13/AURKA	2	BP							GO:0009994	oocyte differentiation	2/18	49/17910	0.0010909613651346	0.00698598067147597	0.00390852271165491	TRIP13/AURKA	2	BP
GO:0007062	sister chromatid cohesion	2/18	50/17910	0.00113574224885677	0.00720949427535169	0.004033574302576	BUB1/CDC20	2	BP							GO:0007062	sister chromatid cohesion	2/18	50/17910	0.00113574224885677	0.00720949427535169	0.004033574302576	BUB1/CDC20	2	BP
GO:0000794	condensed nuclear chromosome	2/18	75/18675	0.00233556432274889	0.00803708899298884	0.00347080766228938	AURKB/BUB1	2	CC							GO:0000794	condensed nuclear chromosome	2/18	75/18675	0.00233556432274889	0.00803708899298884	0.00347080766228938	AURKB/BUB1	2	CC
GO:0007018	microtubule-based movement	3/18	224/17910	0.00137104508692564	0.00862812856427341	0.00482727308282348	KIF23/KIF4A/DLGAP5	3	BP							GO:0007018	microtubule-based movement	3/18	224/17910	0.00137104508692564	0.00862812856427341	0.00482727308282348	KIF23/KIF4A/DLGAP5	3	BP
GO:0006977	DNA damage response, signal transduction by p53 class mediator resulting in cell cycle arrest	2/18	56/17910	0.00142270369135303	0.00887669824519411	0.00496634307013023	AURKA/GTSE1	2	BP							GO:0006977	DNA damage response, signal transduction by p53 class mediator resulting in cell cycle arrest	2/18	56/17910	0.00142270369135303	0.00887669824519411	0.00496634307013023	AURKA/GTSE1	2	BP
GO:0006511	ubiquitin-dependent protein catabolic process	4/18	510/17910	0.00144700679334674	0.00895182168765357	0.005008373200879	AURKA/AURKB/CDC20/DTL	4	BP							GO:0006511	ubiquitin-dependent protein catabolic process	4/18	510/17910	0.00144700679334674	0.00895182168765357	0.005008373200879	AURKA/AURKB/CDC20/DTL	4	BP
GO:0072431	signal transduction involved in mitotic G1 DNA damage checkpoint	2/18	57/17910	0.00147356171377779	0.00896416709214822	0.00501528021882265	AURKA/GTSE1	2	BP							GO:0072431	signal transduction involved in mitotic G1 DNA damage checkpoint	2/18	57/17910	0.00147356171377779	0.00896416709214822	0.00501528021882265	AURKA/GTSE1	2	BP
GO:1902400	intracellular signal transduction involved in G1 DNA damage checkpoint	2/18	57/17910	0.00147356171377779	0.00896416709214822	0.00501528021882265	AURKA/GTSE1	2	BP							GO:1902400	intracellular signal transduction involved in G1 DNA damage checkpoint	2/18	57/17910	0.00147356171377779	0.00896416709214822	0.00501528021882265	AURKA/GTSE1	2	BP
GO:0019941	modification-dependent protein catabolic process	4/18	515/17910	0.0015000192719937	0.00904970304591242	0.00506313595070515	AURKA/AURKB/CDC20/DTL	4	BP							GO:0019941	modification-dependent protein catabolic process	4/18	515/17910	0.0015000192719937	0.00904970304591242	0.00506313595070515	AURKA/AURKB/CDC20/DTL	4	BP
GO:0099513	polymeric cytoskeletal fiber	4/18	635/18675	0.00276953955656983	0.00913527987189091	0.00394506013361011	KIF4A/TUBA1C/AURKA/GTSE1	4	CC							GO:0099513	polymeric cytoskeletal fiber	4/18	635/18675	0.00276953955656983	0.00913527987189091	0.00394506013361011	KIF4A/TUBA1C/AURKA/GTSE1	4	CC
GO:0042585	germinal vesicle	1/18	3/18675	0.00288893466034157	0.00913527987189091	0.00394506013361011	AURKA	1	CC							GO:0042585	germinal vesicle	1/18	3/18675	0.00288893466034157	0.00913527987189091	0.00394506013361011	AURKA	1	CC
GO:0097149	centralspindlin complex	1/18	3/18675	0.00288893466034157	0.00913527987189091	0.00394506013361011	KIF23	1	CC							GO:0097149	centralspindlin complex	1/18	3/18675	0.00288893466034157	0.00913527987189091	0.00394506013361011	KIF23	1	CC
GO:0043632	modification-dependent macromolecule catabolic process	4/18	522/17910	0.00157651246319706	0.00921471132080408	0.00515545492786155	AURKA/AURKB/CDC20/DTL	4	BP							GO:0043632	modification-dependent macromolecule catabolic process	4/18	522/17910	0.00157651246319706	0.00921471132080408	0.00515545492786155	AURKA/AURKB/CDC20/DTL	4	BP
GO:0072413	signal transduction involved in mitotic cell cycle checkpoint	2/18	59/17910	0.00157786152753495	0.00921471132080408	0.00515545492786155	AURKA/GTSE1	2	BP							GO:0072413	signal transduction involved in mitotic cell cycle checkpoint	2/18	59/17910	0.00157786152753495	0.00921471132080408	0.00515545492786155	AURKA/GTSE1	2	BP
GO:1902402	signal transduction involved in mitotic DNA damage checkpoint	2/18	59/17910	0.00157786152753495	0.00921471132080408	0.00515545492786155	AURKA/GTSE1	2	BP							GO:1902402	signal transduction involved in mitotic DNA damage checkpoint	2/18	59/17910	0.00157786152753495	0.00921471132080408	0.00515545492786155	AURKA/GTSE1	2	BP
GO:1902403	signal transduction involved in mitotic DNA integrity checkpoint	2/18	59/17910	0.00157786152753495	0.00921471132080408	0.00515545492786155	AURKA/GTSE1	2	BP							GO:1902403	signal transduction involved in mitotic DNA integrity checkpoint	2/18	59/17910	0.00157786152753495	0.00921471132080408	0.00515545492786155	AURKA/GTSE1	2	BP
GO:0051785	positive regulation of nuclear division	2/18	60/17910	0.00163130014454954	0.00933722474245639	0.00522399884653652	AURKA/DLGAP5	2	BP							GO:0051785	positive regulation of nuclear division	2/18	60/17910	0.00163130014454954	0.00933722474245639	0.00522399884653652	AURKA/DLGAP5	2	BP
GO:0006464	cellular protein modification process	10/18	3851/17910	0.00163721200963619	0.00933722474245639	0.00522399884653652	CCNE2/AURKA/AURKB/BIRC5/BUB1/CDC20/CDC25A/CDCA3/DLGAP5/DTL	10	BP							GO:0006464	cellular protein modification process	10/18	3851/17910	0.00163721200963619	0.00933722474245639	0.00522399884653652	CCNE2/AURKA/AURKB/BIRC5/BUB1/CDC20/CDC25A/CDCA3/DLGAP5/DTL	10	BP
GO:0036211	protein modification process	10/18	3851/17910	0.00163721200963619	0.00933722474245639	0.00522399884653652	CCNE2/AURKA/AURKB/BIRC5/BUB1/CDC20/CDC25A/CDCA3/DLGAP5/DTL	10	BP							GO:0036211	protein modification process	10/18	3851/17910	0.00163721200963619	0.00933722474245639	0.00522399884653652	CCNE2/AURKA/AURKB/BIRC5/BUB1/CDC20/CDC25A/CDCA3/DLGAP5/DTL	10	BP
GO:0031571	mitotic G1 DNA damage checkpoint	2/18	63/17910	0.00179675183260647	0.0100894525984825	0.00564485595992963	AURKA/GTSE1	2	BP							GO:0031571	mitotic G1 DNA damage checkpoint	2/18	63/17910	0.00179675183260647	0.0100894525984825	0.00564485595992963	AURKA/GTSE1	2	BP
GO:0044819	mitotic G1/S transition checkpoint	2/18	63/17910	0.00179675183260647	0.0100894525984825	0.00564485595992963	AURKA/GTSE1	2	BP							GO:0044819	mitotic G1/S transition checkpoint	2/18	63/17910	0.00179675183260647	0.0100894525984825	0.00564485595992963	AURKA/GTSE1	2	BP
GO:0044783	G1 DNA damage checkpoint	2/18	64/17910	0.00185360907395583	0.0103292719388378	0.00577903029887394	AURKA/GTSE1	2	BP							GO:0044783	G1 DNA damage checkpoint	2/18	64/17910	0.00185360907395583	0.0103292719388378	0.00577903029887394	AURKA/GTSE1	2	BP
GO:0005875	microtubule associated complex	2/18	92/18675	0.0034891559748757	0.0107429276068541	0.00463932096382365	AURKB/BIRC5	2	CC							GO:0005875	microtubule associated complex	2/18	92/18675	0.0034891559748757	0.0107429276068541	0.00463932096382365	AURKB/BIRC5	2	CC
GO:0000942	condensed nuclear chromosome outer kinetochore	1/18	4/18675	0.0038501599803985	0.0112617179426656	0.00486335997524022	BUB1	1	CC							GO:0000942	condensed nuclear chromosome outer kinetochore	1/18	4/18675	0.0038501599803985	0.0112617179426656	0.00486335997524022	BUB1	1	CC
GO:0001674	female germ cell nucleus	1/18	4/18675	0.0038501599803985	0.0112617179426656	0.00486335997524022	AURKA	1	CC							GO:0001674	female germ cell nucleus	1/18	4/18675	0.0038501599803985	0.0112617179426656	0.00486335997524022	AURKA	1	CC
GO:0008283	cell proliferation	7/18	1969/17910	0.00203930100095055	0.0112779525052568	0.00630979895030952	CENPF/AURKB/BIRC5/BUB1/CDC20/CDC25A/DLGAP5	7	BP							GO:0008283	cell proliferation	7/18	1969/17910	0.00203930100095055	0.0112779525052568	0.00630979895030952	CENPF/AURKB/BIRC5/BUB1/CDC20/CDC25A/DLGAP5	7	BP
GO:0006260	DNA replication	3/18	259/17910	0.00207702983172653	0.0114002389260178	0.00637821586632287	CCNE2/DTL/EXO1	3	BP							GO:0006260	DNA replication	3/18	259/17910	0.00207702983172653	0.0114002389260178	0.00637821586632287	CCNE2/DTL/EXO1	3	BP
GO:0021700	developmental maturation	3/18	262/17910	0.00214627924019318	0.0116293028093632	0.00650637273256369	TRIP13/AURKA/CDC20	3	BP							GO:0021700	developmental maturation	3/18	262/17910	0.00214627924019318	0.0116293028093632	0.00650637273256369	TRIP13/AURKA/CDC20	3	BP
GO:0000281	mitotic cytokinesis	2/18	69/17910	0.00215062449214251	0.0116293028093632	0.00650637273256369	KIF23/KIF4A	2	BP							GO:0000281	mitotic cytokinesis	2/18	69/17910	0.00215062449214251	0.0116293028093632	0.00650637273256369	KIF23/KIF4A	2	BP
GO:0050000	chromosome localization	2/18	72/17910	0.00233896062580163	0.0124114845635012	0.0069439884796517	CENPF/DLGAP5	2	BP							GO:0050000	chromosome localization	2/18	72/17910	0.00233896062580163	0.0124114845635012	0.0069439884796517	CENPF/DLGAP5	2	BP
GO:0051303	establishment of chromosome localization	2/18	72/17910	0.00233896062580163	0.0124114845635012	0.0069439884796517	CENPF/DLGAP5	2	BP							GO:0051303	establishment of chromosome localization	2/18	72/17910	0.00233896062580163	0.0124114845635012	0.0069439884796517	CENPF/DLGAP5	2	BP
GO:0043412	macromolecule modification	10/18	4027/17910	0.00234628064351118	0.0124114845635012	0.0069439884796517	CCNE2/AURKA/AURKB/BIRC5/BUB1/CDC20/CDC25A/CDCA3/DLGAP5/DTL	10	BP							GO:0043412	macromolecule modification	10/18	4027/17910	0.00234628064351118	0.0124114845635012	0.0069439884796517	CCNE2/AURKA/AURKB/BIRC5/BUB1/CDC20/CDC25A/CDCA3/DLGAP5/DTL	10	BP
GO:0051603	proteolysis involved in cellular protein catabolic process	4/18	590/17910	0.00246792071175815	0.0129610224430464	0.00725144442379524	AURKA/AURKB/CDC20/DTL	4	BP							GO:0051603	proteolysis involved in cellular protein catabolic process	4/18	590/17910	0.00246792071175815	0.0129610224430464	0.00725144442379524	AURKA/AURKB/CDC20/DTL	4	BP
GO:0016363	nuclear matrix	2/18	106/18675	0.00460174924766193	0.0131318210238157	0.00567096184564243	CENPF/KIF4A	2	CC							GO:0016363	nuclear matrix	2/18	106/18675	0.00460174924766193	0.0131318210238157	0.00567096184564243	CENPF/KIF4A	2	CC
GO:0031465	Cul4B-RING E3 ubiquitin ligase complex	1/18	5/18675	0.00481051010199651	0.0134007067127046	0.00578707982195069	DTL	1	CC							GO:0031465	Cul4B-RING E3 ubiquitin ligase complex	1/18	5/18675	0.00481051010199651	0.0134007067127046	0.00578707982195069	DTL	1	CC
GO:0006890	retrograde vesicle-mediated transport, Golgi to ER	2/18	76/17910	0.00260180266296947	0.0135665424569122	0.0075902213024974	KIF23/KIF4A	2	BP							GO:0006890	retrograde vesicle-mediated transport, Golgi to ER	2/18	76/17910	0.00260180266296947	0.0135665424569122	0.0075902213024974	KIF23/KIF4A	2	BP
GO:0034644	cellular response to UV	2/18	77/17910	0.00266959693971451	0.0138213174893021	0.00773276306539178	AURKB/CDC25A	2	BP							GO:0034644	cellular response to UV	2/18	77/17910	0.00266959693971451	0.0138213174893021	0.00773276306539178	AURKB/CDC25A	2	BP
GO:0051640	organelle localization	4/18	623/17910	0.00300636739752211	0.0149008460478664	0.00833673866845301	CENPF/KIF23/AURKA/DLGAP5	4	BP							GO:0051640	organelle localization	4/18	623/17910	0.00300636739752211	0.0149008460478664	0.00833673866845301	CENPF/KIF23/AURKA/DLGAP5	4	BP
GO:0007056	spindle assembly involved in female meiosis	1/18	3/17910	0.00301221418885922	0.0149008460478664	0.00833673866845301	AURKA	1	BP							GO:0007056	spindle assembly involved in female meiosis	1/18	3/17910	0.00301221418885922	0.0149008460478664	0.00833673866845301	AURKA	1	BP
GO:0043988	histone H3-S28 phosphorylation	1/18	3/17910	0.00301221418885922	0.0149008460478664	0.00833673866845301	AURKB	1	BP							GO:0043988	histone H3-S28 phosphorylation	1/18	3/17910	0.00301221418885922	0.0149008460478664	0.00833673866845301	AURKB	1	BP
GO:0060282	positive regulation of oocyte development	1/18	3/17910	0.00301221418885922	0.0149008460478664	0.00833673866845301	AURKA	1	BP							GO:0060282	positive regulation of oocyte development	1/18	3/17910	0.00301221418885922	0.0149008460478664	0.00833673866845301	AURKA	1	BP
GO:1905881	positive regulation of oogenesis	1/18	3/17910	0.00301221418885922	0.0149008460478664	0.00833673866845301	AURKA	1	BP							GO:1905881	positive regulation of oogenesis	1/18	3/17910	0.00301221418885922	0.0149008460478664	0.00833673866845301	AURKA	1	BP
GO:0071158	positive regulation of cell cycle arrest	2/18	82/17910	0.00302099344532086	0.0149008460478664	0.00833673866845301	AURKA/GTSE1	2	BP							GO:0071158	positive regulation of cell cycle arrest	2/18	82/17910	0.00302099344532086	0.0149008460478664	0.00833673866845301	AURKA/GTSE1	2	BP
GO:1901992	positive regulation of mitotic cell cycle phase transition	2/18	82/17910	0.00302099344532086	0.0149008460478664	0.00833673866845301	DLGAP5/DTL	2	BP							GO:1901992	positive regulation of mitotic cell cycle phase transition	2/18	82/17910	0.00302099344532086	0.0149008460478664	0.00833673866845301	DLGAP5/DTL	2	BP
GO:0032465	regulation of cytokinesis	2/18	83/17910	0.00309374696129662	0.015157283770111	0.00848021067455379	KIF23/AURKB	2	BP							GO:0032465	regulation of cytokinesis	2/18	83/17910	0.00309374696129662	0.015157283770111	0.00848021067455379	KIF23/AURKB	2	BP
GO:0048477	oogenesis	2/18	84/17910	0.00316732162159039	0.0153122171109999	0.00856689291862719	TRIP13/AURKA	2	BP							GO:0048477	oogenesis	2/18	84/17910	0.00316732162159039	0.0153122171109999	0.00856689291862719	TRIP13/AURKA	2	BP
GO:0051781	positive regulation of cell division	2/18	84/17910	0.00316732162159039	0.0153122171109999	0.00856689291862719	KIF23/AURKB	2	BP							GO:0051781	positive regulation of cell division	2/18	84/17910	0.00316732162159039	0.0153122171109999	0.00856689291862719	KIF23/AURKB	2	BP
GO:0010972	negative regulation of G2/M transition of mitotic cell cycle	2/18	85/17910	0.00324171588986909	0.0155687671026607	0.00871042773732137	AURKA/AURKB	2	BP							GO:0010972	negative regulation of G2/M transition of mitotic cell cycle	2/18	85/17910	0.00324171588986909	0.0155687671026607	0.00871042773732137	AURKA/AURKB	2	BP
GO:0044773	mitotic DNA damage checkpoint	2/18	86/17910	0.0033169282317651	0.0158258667267224	0.00885427006484251	AURKA/GTSE1	2	BP							GO:0044773	mitotic DNA damage checkpoint	2/18	86/17910	0.0033169282317651	0.0158258667267224	0.00885427006484251	AURKA/GTSE1	2	BP
GO:0009416	response to light stimulus	3/18	307/17910	0.00336236530400259	0.0159384848826097	0.00891727777138076	AURKB/CDC25A/DTL	3	BP							GO:0009416	response to light stimulus	3/18	307/17910	0.00336236530400259	0.0159384848826097	0.00891727777138076	AURKB/CDC25A/DTL	3	BP
GO:0044257	cellular protein catabolic process	4/18	648/17910	0.00346480472090687	0.016236889335834	0.00908422936164902	AURKA/AURKB/CDC20/DTL	4	BP							GO:0044257	cellular protein catabolic process	4/18	648/17910	0.00346480472090687	0.016236889335834	0.00908422936164902	AURKA/AURKB/CDC20/DTL	4	BP
GO:0007127	meiosis I	2/18	88/17910	0.00346980100875357	0.016236889335834	0.00908422936164902	TRIP13/AURKA	2	BP							GO:0007127	meiosis I	2/18	88/17910	0.00346980100875357	0.016236889335834	0.00908422936164902	TRIP13/AURKA	2	BP
GO:0044774	mitotic DNA integrity checkpoint	2/18	90/17910	0.00362592771684566	0.0168594091292823	0.00943251729223007	AURKA/GTSE1	2	BP							GO:0044774	mitotic DNA integrity checkpoint	2/18	90/17910	0.00362592771684566	0.0168594091292823	0.00943251729223007	AURKA/GTSE1	2	BP
GO:0031461	cullin-RING ubiquitin ligase complex	2/18	124/18675	0.00624171655098925	0.0169832752666452	0.00733420794241087	CDC20/DTL	2	CC							GO:0031461	cullin-RING ubiquitin ligase complex	2/18	124/18675	0.00624171655098925	0.0169832752666452	0.00733420794241087	CDC20/DTL	2	CC
GO:0061982	meiosis I cell cycle process	2/18	91/17910	0.00370520747996067	0.0171189965846284	0.00957775151382239	TRIP13/AURKA	2	BP							GO:0061982	meiosis I cell cycle process	2/18	91/17910	0.00370520747996067	0.0171189965846284	0.00957775151382239	TRIP13/AURKA	2	BP
GO:0034399	nuclear periphery	2/18	126/18675	0.00643818520528567	0.0171197197504187	0.00739313133621321	CENPF/KIF4A	2	CC							GO:0034399	nuclear periphery	2/18	126/18675	0.00643818520528567	0.0171197197504187	0.00739313133621321	CENPF/KIF4A	2	CC
GO:0000778	condensed nuclear chromosome kinetochore	1/18	7/18675	0.00672858774935525	0.0174943281483237	0.00755490554313572	BUB1	1	CC							GO:0000778	condensed nuclear chromosome kinetochore	1/18	7/18675	0.00672858774935525	0.0174943281483237	0.00755490554313572	BUB1	1	CC
GO:0051129	negative regulation of cellular component organization	4/18	673/17910	0.00396929167546483	0.0179785108972657	0.0100586333498761	CENPF/TRIP13/AURKB/CDC20	4	BP							GO:0051129	negative regulation of cellular component organization	4/18	673/17910	0.00396929167546483	0.0179785108972657	0.0100586333498761	CENPF/TRIP13/AURKB/CDC20	4	BP
GO:0000912	assembly of actomyosin apparatus involved in cytokinesis	1/18	4/17910	0.00401437983048536	0.0179785108972657	0.0100586333498761	KIF23	1	BP							GO:0000912	assembly of actomyosin apparatus involved in cytokinesis	1/18	4/17910	0.00401437983048536	0.0179785108972657	0.0100586333498761	KIF23	1	BP
GO:0000915	actomyosin contractile ring assembly	1/18	4/17910	0.00401437983048536	0.0179785108972657	0.0100586333498761	KIF23	1	BP							GO:0000915	actomyosin contractile ring assembly	1/18	4/17910	0.00401437983048536	0.0179785108972657	0.0100586333498761	KIF23	1	BP
GO:0007079	mitotic chromosome movement towards spindle pole	1/18	4/17910	0.00401437983048536	0.0179785108972657	0.0100586333498761	DLGAP5	1	BP							GO:0007079	mitotic chromosome movement towards spindle pole	1/18	4/17910	0.00401437983048536	0.0179785108972657	0.0100586333498761	DLGAP5	1	BP
GO:0044878	mitotic cytokinesis checkpoint	1/18	4/17910	0.00401437983048536	0.0179785108972657	0.0100586333498761	AURKB	1	BP							GO:0044878	mitotic cytokinesis checkpoint	1/18	4/17910	0.00401437983048536	0.0179785108972657	0.0100586333498761	AURKB	1	BP
GO:0043161	proteasome-mediated ubiquitin-dependent protein catabolic process	3/18	328/17910	0.00404940479275053	0.0180247896262676	0.010084525414552	AURKA/AURKB/CDC20	3	BP							GO:0043161	proteasome-mediated ubiquitin-dependent protein catabolic process	3/18	328/17910	0.00404940479275053	0.0180247896262676	0.010084525414552	AURKA/AURKB/CDC20	3	BP
GO:0007010	cytoskeleton organization	5/18	1124/17910	0.00415517760034928	0.0182405273090469	0.0102052265261863	KIF23/KIF4A/AURKA/AURKB/CDC20	5	BP							GO:0007010	cytoskeleton organization	5/18	1124/17910	0.00415517760034928	0.0182405273090469	0.0102052265261863	KIF23/KIF4A/AURKA/AURKB/CDC20	5	BP
GO:0006508	proteolysis	6/18	1645/17910	0.0041886313836422	0.0182405273090469	0.0102052265261863	AURKA/AURKB/BIRC5/CDC20/CDC25A/DTL	6	BP							GO:0006508	proteolysis	6/18	1645/17910	0.0041886313836422	0.0182405273090469	0.0102052265261863	AURKA/AURKB/BIRC5/CDC20/CDC25A/DTL	6	BP
GO:0019886	antigen processing and presentation of exogenous peptide antigen via MHC class II	2/18	97/17910	0.00419781998345189	0.0182405273090469	0.0102052265261863	KIF23/KIF4A	2	BP							GO:0019886	antigen processing and presentation of exogenous peptide antigen via MHC class II	2/18	97/17910	0.00419781998345189	0.0182405273090469	0.0102052265261863	KIF23/KIF4A	2	BP
GO:1901989	positive regulation of cell cycle phase transition	2/18	97/17910	0.00419781998345189	0.0182405273090469	0.0102052265261863	DLGAP5/DTL	2	BP							GO:1901989	positive regulation of cell cycle phase transition	2/18	97/17910	0.00419781998345189	0.0182405273090469	0.0102052265261863	DLGAP5/DTL	2	BP
GO:0099512	supramolecular fiber	4/18	845/18675	0.00766177037582443	0.0184523277396166	0.00796861656771568	KIF4A/TUBA1C/AURKA/GTSE1	4	CC							GO:0099512	supramolecular fiber	4/18	845/18675	0.00766177037582443	0.0184523277396166	0.00796861656771568	KIF4A/TUBA1C/AURKA/GTSE1	4	CC
GO:0043203	axon hillock	1/18	8/18675	0.00768631677338116	0.0184523277396166	0.00796861656771568	AURKA	1	CC							GO:0043203	axon hillock	1/18	8/18675	0.00768631677338116	0.0184523277396166	0.00796861656771568	AURKA	1	CC
GO:0097539	ciliary transition fiber	1/18	8/18675	0.00768631677338116	0.0184523277396166	0.00796861656771568	CENPF	1	CC							GO:0097539	ciliary transition fiber	1/18	8/18675	0.00768631677338116	0.0184523277396166	0.00796861656771568	CENPF	1	CC
GO:0099081	supramolecular polymer	4/18	851/18675	0.00785336835645447	0.0184523277396166	0.00796861656771568	KIF4A/TUBA1C/AURKA/GTSE1	4	CC							GO:0099081	supramolecular polymer	4/18	851/18675	0.00785336835645447	0.0184523277396166	0.00796861656771568	KIF4A/TUBA1C/AURKA/GTSE1	4	CC
GO:0099080	supramolecular complex	4/18	852/18675	0.00788561014513531	0.0184523277396166	0.00796861656771568	KIF4A/TUBA1C/AURKA/GTSE1	4	CC							GO:0099080	supramolecular complex	4/18	852/18675	0.00788561014513531	0.0184523277396166	0.00796861656771568	KIF4A/TUBA1C/AURKA/GTSE1	4	CC
GO:0002495	antigen processing and presentation of peptide antigen via MHC class II	2/18	100/17910	0.00445494416237005	0.019243249932131	0.0107662306757993	KIF23/KIF4A	2	BP							GO:0002495	antigen processing and presentation of peptide antigen via MHC class II	2/18	100/17910	0.00445494416237005	0.019243249932131	0.0107662306757993	KIF23/KIF4A	2	BP
GO:0002504	antigen processing and presentation of peptide or polysaccharide antigen via MHC class II	2/18	101/17910	0.00454224481460895	0.0195049336156737	0.0109126376970172	KIF23/KIF4A	2	BP							GO:0002504	antigen processing and presentation of peptide or polysaccharide antigen via MHC class II	2/18	101/17910	0.00454224481460895	0.0195049336156737	0.0109126376970172	KIF23/KIF4A	2	BP
GO:0032091	negative regulation of protein binding	2/18	103/17910	0.00471922598588063	0.0201464033315372	0.0112715277471326	AURKA/AURKB	2	BP							GO:0032091	negative regulation of protein binding	2/18	103/17910	0.00471922598588063	0.0201464033315372	0.0112715277471326	AURKA/AURKB	2	BP
GO:0030330	DNA damage response, signal transduction by p53 class mediator	2/18	106/17910	0.00499062491963634	0.021164067225064	0.0118408912520906	AURKA/GTSE1	2	BP							GO:0030330	DNA damage response, signal transduction by p53 class mediator	2/18	106/17910	0.00499062491963634	0.021164067225064	0.0118408912520906	AURKA/GTSE1	2	BP
GO:0044837	actomyosin contractile ring organization	1/18	5/17910	0.00501559401361107	0.021164067225064	0.0118408912520906	KIF23	1	BP							GO:0044837	actomyosin contractile ring organization	1/18	5/17910	0.00501559401361107	0.021164067225064	0.0118408912520906	KIF23	1	BP
GO:0071156	regulation of cell cycle arrest	2/18	108/17910	0.00517549154596528	0.0217132691296244	0.0121481592246493	AURKA/GTSE1	2	BP							GO:0071156	regulation of cell cycle arrest	2/18	108/17910	0.00517549154596528	0.0217132691296244	0.0121481592246493	AURKA/GTSE1	2	BP
GO:0072687	meiotic spindle	1/18	10/18675	0.0095991589632739	0.0218220062827907	0.00942380838123217	AURKA	1	CC							GO:0072687	meiotic spindle	1/18	10/18675	0.0095991589632739	0.0218220062827907	0.00942380838123217	AURKA	1	CC
GO:0044454	nuclear chromosome part	3/18	469/18675	0.0096986694590181	0.0218220062827907	0.00942380838123217	ASF1B/AURKB/BUB1	3	CC							GO:0044454	nuclear chromosome part	3/18	469/18675	0.0096986694590181	0.0218220062827907	0.00942380838123217	ASF1B/AURKB/BUB1	3	CC
GO:0051128	regulation of cellular component organization	7/18	2340/17910	0.00550045151450409	0.0229447406033599	0.0128371439857298	CENPF/TRIP13/AURKA/AURKB/BUB1/CDC20/DLGAP5	7	BP							GO:0051128	regulation of cellular component organization	7/18	2340/17910	0.00550045151450409	0.0229447406033599	0.0128371439857298	CENPF/TRIP13/AURKA/AURKB/BUB1/CDC20/DLGAP5	7	BP
GO:1990023	mitotic spindle midzone	1/18	11/18675	0.0105542736237967	0.0232990568676266	0.010061670981971	AURKB	1	CC							GO:1990023	mitotic spindle midzone	1/18	11/18675	0.0105542736237967	0.0232990568676266	0.010061670981971	AURKB	1	CC
GO:0071482	cellular response to light stimulus	2/18	113/17910	0.00565134022412615	0.0234402179750687	0.0131143541086181	AURKB/CDC25A	2	BP							GO:0071482	cellular response to light stimulus	2/18	113/17910	0.00565134022412615	0.0234402179750687	0.0131143541086181	AURKB/CDC25A	2	BP
GO:0009838	abscission	1/18	6/17910	0.00601585758846457	0.0243976446643285	0.0136500160486798	AURKB	1	BP							GO:0009838	abscission	1/18	6/17910	0.00601585758846457	0.0243976446643285	0.0136500160486798	AURKB	1	BP
GO:0045842	positive regulation of mitotic metaphase/anaphase transition	1/18	6/17910	0.00601585758846457	0.0243976446643285	0.0136500160486798	DLGAP5	1	BP							GO:0045842	positive regulation of mitotic metaphase/anaphase transition	1/18	6/17910	0.00601585758846457	0.0243976446643285	0.0136500160486798	DLGAP5	1	BP
GO:0090306	spindle assembly involved in meiosis	1/18	6/17910	0.00601585758846457	0.0243976446643285	0.0136500160486798	AURKA	1	BP							GO:0090306	spindle assembly involved in meiosis	1/18	6/17910	0.00601585758846457	0.0243976446643285	0.0136500160486798	AURKA	1	BP
GO:1901970	positive regulation of mitotic sister chromatid separation	1/18	6/17910	0.00601585758846457	0.0243976446643285	0.0136500160486798	DLGAP5	1	BP							GO:1901970	positive regulation of mitotic sister chromatid separation	1/18	6/17910	0.00601585758846457	0.0243976446643285	0.0136500160486798	DLGAP5	1	BP
GO:0031464	Cul4A-RING E3 ubiquitin ligase complex	1/18	12/18675	0.0115085183234737	0.0249351230341929	0.0107682042792736	DTL	1	CC							GO:0031464	Cul4A-RING E3 ubiquitin ligase complex	1/18	12/18675	0.0115085183234737	0.0249351230341929	0.0107682042792736	DTL	1	CC
GO:0010498	proteasomal protein catabolic process	3/18	382/17910	0.00619130084775399	0.0249704398832067	0.0139704840298258	AURKA/AURKB/CDC20	3	BP							GO:0010498	proteasomal protein catabolic process	3/18	382/17910	0.00619130084775399	0.0249704398832067	0.0139704840298258	AURKA/AURKB/CDC20	3	BP
GO:2000134	negative regulation of G1/S transition of mitotic cell cycle	2/18	124/17910	0.00676622751280491	0.027139264199712	0.0151838997973875	AURKA/GTSE1	2	BP							GO:2000134	negative regulation of G1/S transition of mitotic cell cycle	2/18	124/17910	0.00676622751280491	0.027139264199712	0.0151838997973875	AURKA/GTSE1	2	BP
GO:0032466	negative regulation of cytokinesis	1/18	7/17910	0.00701517140456254	0.0272397613049503	0.0152401260076723	AURKB	1	BP							GO:0032466	negative regulation of cytokinesis	1/18	7/17910	0.00701517140456254	0.0272397613049503	0.0152401260076723	AURKB	1	BP
GO:0036089	cleavage furrow formation	1/18	7/17910	0.00701517140456254	0.0272397613049503	0.0152401260076723	AURKB	1	BP							GO:0036089	cleavage furrow formation	1/18	7/17910	0.00701517140456254	0.0272397613049503	0.0152401260076723	AURKB	1	BP
GO:0051305	chromosome movement towards spindle pole	1/18	7/17910	0.00701517140456254	0.0272397613049503	0.0152401260076723	DLGAP5	1	BP							GO:0051305	chromosome movement towards spindle pole	1/18	7/17910	0.00701517140456254	0.0272397613049503	0.0152401260076723	DLGAP5	1	BP
GO:0072383	plus-end-directed vesicle transport along microtubule	1/18	7/17910	0.00701517140456254	0.0272397613049503	0.0152401260076723	KIF23	1	BP							GO:0072383	plus-end-directed vesicle transport along microtubule	1/18	7/17910	0.00701517140456254	0.0272397613049503	0.0152401260076723	KIF23	1	BP
GO:1900193	regulation of oocyte maturation	1/18	7/17910	0.00701517140456254	0.0272397613049503	0.0152401260076723	AURKA	1	BP							GO:1900193	regulation of oocyte maturation	1/18	7/17910	0.00701517140456254	0.0272397613049503	0.0152401260076723	AURKA	1	BP
GO:1902101	positive regulation of metaphase/anaphase transition of cell cycle	1/18	7/17910	0.00701517140456254	0.0272397613049503	0.0152401260076723	DLGAP5	1	BP							GO:1902101	positive regulation of metaphase/anaphase transition of cell cycle	1/18	7/17910	0.00701517140456254	0.0272397613049503	0.0152401260076723	DLGAP5	1	BP
GO:0032838	plasma membrane bounded cell projection cytoplasm	2/18	181/18675	0.0129078193744473	0.0274584521238243	0.0118579010521239	CENPF/KIF4A	2	CC							GO:0032838	plasma membrane bounded cell projection cytoplasm	2/18	181/18675	0.0129078193744473	0.0274584521238243	0.0118579010521239	CENPF/KIF4A	2	CC
GO:0006468	protein phosphorylation	6/18	1835/17910	0.00719220154435307	0.0277794027903584	0.0155420451083765	CCNE2/AURKA/AURKB/BIRC5/BUB1/CDC25A	6	BP							GO:0006468	protein phosphorylation	6/18	1835/17910	0.00719220154435307	0.0277794027903584	0.0155420451083765	CCNE2/AURKA/AURKB/BIRC5/BUB1/CDC25A	6	BP
GO:0030163	protein catabolic process	4/18	799/17910	0.00729048438737224	0.0280108084356933	0.0156715121457087	AURKA/AURKB/CDC20/DTL	4	BP							GO:0030163	protein catabolic process	4/18	799/17910	0.00729048438737224	0.0280108084356933	0.0156715121457087	AURKA/AURKB/CDC20/DTL	4	BP
GO:0010369	chromocenter	1/18	14/18675	0.0134144008229991	0.0280265160051944	0.0121032187876683	AURKB	1	CC							GO:0010369	chromocenter	1/18	14/18675	0.0134144008229991	0.0280265160051944	0.0121032187876683	AURKB	1	CC
GO:1902807	negative regulation of cell cycle G1/S phase transition	2/18	130/17910	0.007413219502446	0.0283332473130135	0.0158519105370573	AURKA/GTSE1	2	BP							GO:1902807	negative regulation of cell cycle G1/S phase transition	2/18	130/17910	0.007413219502446	0.0283332473130135	0.0158519105370573	AURKA/GTSE1	2	BP
GO:0007292	female gamete generation	2/18	132/17910	0.00763490719307398	0.0290285533903334	0.0162409210028109	TRIP13/AURKA	2	BP							GO:0007292	female gamete generation	2/18	132/17910	0.00763490719307398	0.0290285533903334	0.0162409210028109	TRIP13/AURKA	2	BP
GO:0060249	anatomical structure homeostasis	3/18	413/17910	0.00767779695691889	0.0290403719095896	0.0162475332385303	CCNE2/AURKB/EXO1	3	BP							GO:0060249	anatomical structure homeostasis	3/18	413/17910	0.00767779695691889	0.0290403719095896	0.0162475332385303	CCNE2/AURKB/EXO1	3	BP
GO:0001673	male germ cell nucleus	1/18	15/18675	0.0143660401127044	0.0294881875997616	0.0127344399891008	TRIP13	1	CC							GO:0001673	male germ cell nucleus	1/18	15/18675	0.0143660401127044	0.0294881875997616	0.0127344399891008	TRIP13	1	CC
GO:2000241	regulation of reproductive process	2/18	135/17910	0.00797304615972161	0.0296948299838406	0.0166136900270082	AURKA/CDC20	2	BP							GO:2000241	regulation of reproductive process	2/18	135/17910	0.00797304615972161	0.0296948299838406	0.0166136900270082	AURKA/CDC20	2	BP
GO:0072386	plus-end-directed organelle transport along microtubule	1/18	8/17910	0.00801353631070767	0.0296948299838406	0.0166136900270082	KIF23	1	BP							GO:0072386	plus-end-directed organelle transport along microtubule	1/18	8/17910	0.00801353631070767	0.0296948299838406	0.0166136900270082	KIF23	1	BP
GO:1903431	positive regulation of cell maturation	1/18	8/17910	0.00801353631070767	0.0296948299838406	0.0166136900270082	AURKA	1	BP							GO:1903431	positive regulation of cell maturation	1/18	8/17910	0.00801353631070767	0.0296948299838406	0.0166136900270082	AURKA	1	BP
GO:1905820	positive regulation of chromosome separation	1/18	8/17910	0.00801353631070767	0.0296948299838406	0.0166136900270082	DLGAP5	1	BP							GO:1905820	positive regulation of chromosome separation	1/18	8/17910	0.00801353631070767	0.0296948299838406	0.0166136900270082	DLGAP5	1	BP
GO:0009314	response to radiation	3/18	435/17910	0.00885134236070828	0.0322450774663985	0.0180405047685114	AURKB/CDC25A/DTL	3	BP							GO:0009314	response to radiation	3/18	435/17910	0.00885134236070828	0.0322450774663985	0.0180405047685114	AURKB/CDC25A/DTL	3	BP
GO:0010970	transport along microtubule	2/18	143/17910	0.00890737286275339	0.0322450774663985	0.0180405047685114	KIF23/KIF4A	2	BP							GO:0010970	transport along microtubule	2/18	143/17910	0.00890737286275339	0.0322450774663985	0.0180405047685114	KIF23/KIF4A	2	BP
GO:0099111	microtubule-based transport	2/18	143/17910	0.00890737286275339	0.0322450774663985	0.0180405047685114	KIF23/KIF4A	2	BP							GO:0099111	microtubule-based transport	2/18	143/17910	0.00890737286275339	0.0322450774663985	0.0180405047685114	KIF23/KIF4A	2	BP
GO:0051649	establishment of localization in cell	6/18	1919/17910	0.00893813763185012	0.0322450774663985	0.0180405047685114	CENPF/KIF23/KIF4A/TUBA1C/DLGAP5/GTSE1	6	BP							GO:0051649	establishment of localization in cell	6/18	1919/17910	0.00893813763185012	0.0322450774663985	0.0180405047685114	CENPF/KIF23/KIF4A/TUBA1C/DLGAP5/GTSE1	6	BP
GO:0060281	regulation of oocyte development	1/18	9/17910	0.00901095315499356	0.0322450774663985	0.0180405047685114	AURKA	1	BP							GO:0060281	regulation of oocyte development	1/18	9/17910	0.00901095315499356	0.0322450774663985	0.0180405047685114	AURKA	1	BP
GO:0090129	positive regulation of synapse maturation	1/18	9/17910	0.00901095315499356	0.0322450774663985	0.0180405047685114	CDC20	1	BP							GO:0090129	positive regulation of synapse maturation	1/18	9/17910	0.00901095315499356	0.0322450774663985	0.0180405047685114	CDC20	1	BP
GO:1905879	regulation of oogenesis	1/18	9/17910	0.00901095315499356	0.0322450774663985	0.0180405047685114	AURKA	1	BP							GO:1905879	regulation of oogenesis	1/18	9/17910	0.00901095315499356	0.0322450774663985	0.0180405047685114	AURKA	1	BP
GO:0022414	reproductive process	5/18	1353/17910	0.00911077162089461	0.0323850404368611	0.0181188113763549	TRIP13/ASF1B/AURKA/CDC20/EXO1	5	BP							GO:0022414	reproductive process	5/18	1353/17910	0.00911077162089461	0.0323850404368611	0.0181188113763549	TRIP13/ASF1B/AURKA/CDC20/EXO1	5	BP
GO:0000003	reproduction	5/18	1354/17910	0.00913879223286765	0.0323850404368611	0.0181188113763549	TRIP13/ASF1B/AURKA/CDC20/EXO1	5	BP							GO:0000003	reproduction	5/18	1354/17910	0.00913879223286765	0.0323850404368611	0.0181188113763549	TRIP13/ASF1B/AURKA/CDC20/EXO1	5	BP
GO:0051656	establishment of organelle localization	3/18	448/17910	0.0095921116140922	0.0338272535182962	0.0189257020405175	CENPF/KIF23/DLGAP5	3	BP							GO:0051656	establishment of organelle localization	3/18	448/17910	0.0095921116140922	0.0338272535182962	0.0189257020405175	CENPF/KIF23/DLGAP5	3	BP
GO:0044267	cellular protein metabolic process	10/18	4871/17910	0.0102321619756942	0.0359109530877729	0.0200914921385089	CCNE2/AURKA/AURKB/BIRC5/BUB1/CDC20/CDC25A/CDCA3/DLGAP5/DTL	10	BP							GO:0044267	cellular protein metabolic process	10/18	4871/17910	0.0102321619756942	0.0359109530877729	0.0200914921385089	CCNE2/AURKA/AURKB/BIRC5/BUB1/CDC20/CDC25A/CDCA3/DLGAP5/DTL	10	BP
GO:0071695	anatomical structure maturation	2/18	155/17910	0.0103965220818209	0.036313211099183	0.0203165478103576	TRIP13/AURKA	2	BP							GO:0071695	anatomical structure maturation	2/18	155/17910	0.0103965220818209	0.036313211099183	0.0203165478103576	TRIP13/AURKA	2	BP
GO:1990234	transferase complex	3/18	597/18675	0.0185444793105763	0.0374086910230592	0.0161549003068542	CCNE2/CDC20/DTL	3	CC							GO:1990234	transferase complex	3/18	597/18675	0.0185444793105763	0.0374086910230592	0.0161549003068542	CCNE2/CDC20/DTL	3	CC
GO:0007100	mitotic centrosome separation	1/18	11/17910	0.0110029460468064	0.0378875028970221	0.0211973339928545	AURKA	1	BP							GO:0007100	mitotic centrosome separation	1/18	11/17910	0.0110029460468064	0.0378875028970221	0.0211973339928545	AURKA	1	BP
GO:0016446	somatic hypermutation of immunoglobulin genes	1/18	11/17910	0.0110029460468064	0.0378875028970221	0.0211973339928545	EXO1	1	BP							GO:0016446	somatic hypermutation of immunoglobulin genes	1/18	11/17910	0.0110029460468064	0.0378875028970221	0.0211973339928545	EXO1	1	BP
GO:0031915	positive regulation of synaptic plasticity	1/18	11/17910	0.0110029460468064	0.0378875028970221	0.0211973339928545	CDC20	1	BP							GO:0031915	positive regulation of synaptic plasticity	1/18	11/17910	0.0110029460468064	0.0378875028970221	0.0211973339928545	CDC20	1	BP
GO:0000151	ubiquitin ligase complex	2/18	224/18675	0.0193132246397927	0.0382991064890805	0.0165394252044612	CDC20/DTL	2	CC							GO:0000151	ubiquitin ligase complex	2/18	224/18675	0.0193132246397927	0.0382991064890805	0.0165394252044612	CDC20/DTL	2	CC
GO:0051100	negative regulation of binding	2/18	162/17910	0.0113129249444641	0.0385908187357889	0.0215908257671032	AURKA/AURKB	2	BP							GO:0051100	negative regulation of binding	2/18	162/17910	0.0113129249444641	0.0385908187357889	0.0215908257671032	AURKA/AURKB	2	BP
GO:0051302	regulation of cell division	2/18	162/17910	0.0113129249444641	0.0385908187357889	0.0215908257671032	KIF23/AURKB	2	BP							GO:0051302	regulation of cell division	2/18	162/17910	0.0113129249444641	0.0385908187357889	0.0215908257671032	KIF23/AURKB	2	BP
GO:0005680	anaphase-promoting complex	1/18	21/18675	0.0200576952463722	0.0391125057304259	0.0168906907337872	CDC20	1	CC							GO:0005680	anaphase-promoting complex	1/18	21/18675	0.0200576952463722	0.0391125057304259	0.0168906907337872	CDC20	1	CC
GO:0048469	cell maturation	2/18	167/17910	0.0119886964111782	0.0398099652931235	0.0222729149729372	TRIP13/AURKA	2	BP							GO:0048469	cell maturation	2/18	167/17910	0.0119886964111782	0.0398099652931235	0.0222729149729372	TRIP13/AURKA	2	BP
GO:0000212	meiotic spindle organization	1/18	12/17910	0.0119975237869687	0.0398099652931235	0.0222729149729372	AURKA	1	BP							GO:0000212	meiotic spindle organization	1/18	12/17910	0.0119975237869687	0.0398099652931235	0.0222729149729372	AURKA	1	BP
GO:0002566	somatic diversification of immune receptors via somatic mutation	1/18	12/17910	0.0119975237869687	0.0398099652931235	0.0222729149729372	EXO1	1	BP							GO:0002566	somatic diversification of immune receptors via somatic mutation	1/18	12/17910	0.0119975237869687	0.0398099652931235	0.0222729149729372	EXO1	1	BP
GO:0002903	negative regulation of B cell apoptotic process	1/18	12/17910	0.0119975237869687	0.0398099652931235	0.0222729149729372	AURKB	1	BP							GO:0002903	negative regulation of B cell apoptotic process	1/18	12/17910	0.0119975237869687	0.0398099652931235	0.0222729149729372	AURKB	1	BP
GO:0051299	centrosome separation	1/18	12/17910	0.0119975237869687	0.0398099652931235	0.0222729149729372	AURKA	1	BP							GO:0051299	centrosome separation	1/18	12/17910	0.0119975237869687	0.0398099652931235	0.0222729149729372	AURKA	1	BP
GO:1904668	positive regulation of ubiquitin protein ligase activity	1/18	12/17910	0.0119975237869687	0.0398099652931235	0.0222729149729372	CDC20	1	BP							GO:1904668	positive regulation of ubiquitin protein ligase activity	1/18	12/17910	0.0119975237869687	0.0398099652931235	0.0222729149729372	CDC20	1	BP
GO:2001252	positive regulation of chromosome organization	2/18	169/17910	0.0122639059220585	0.0405097344936775	0.0226644224708679	AURKB/DLGAP5	2	BP							GO:2001252	positive regulation of chromosome organization	2/18	169/17910	0.0122639059220585	0.0405097344936775	0.0226644224708679	AURKB/DLGAP5	2	BP
GO:0071478	cellular response to radiation	2/18	173/17910	0.0128226659035376	0.0421646221152363	0.0235903004768734	AURKB/CDC25A	2	BP							GO:0071478	cellular response to radiation	2/18	173/17910	0.0128226659035376	0.0421646221152363	0.0235903004768734	AURKB/CDC25A	2	BP
GO:0002478	antigen processing and presentation of exogenous peptide antigen	2/18	174/17910	0.0129640855929238	0.0423372522361402	0.0236868837312507	KIF23/KIF4A	2	BP							GO:0002478	antigen processing and presentation of exogenous peptide antigen	2/18	174/17910	0.0129640855929238	0.0423372522361402	0.0236868837312507	KIF23/KIF4A	2	BP
GO:0062033	positive regulation of mitotic sister chromatid segregation	1/18	13/17910	0.0129911568505416	0.0423372522361402	0.0236868837312507	DLGAP5	1	BP							GO:0062033	positive regulation of mitotic sister chromatid segregation	1/18	13/17910	0.0129911568505416	0.0423372522361402	0.0236868837312507	DLGAP5	1	BP
GO:0006281	DNA repair	3/18	502/17910	0.0130547025793374	0.0423552572574058	0.0236969571966452	TRIP13/DTL/EXO1	3	BP							GO:0006281	DNA repair	3/18	502/17910	0.0130547025793374	0.0423552572574058	0.0236969571966452	TRIP13/DTL/EXO1	3	BP
GO:0019884	antigen processing and presentation of exogenous antigen	2/18	176/17910	0.0132489910256078	0.0427954134897951	0.0239432161990491	KIF23/KIF4A	2	BP							GO:0019884	antigen processing and presentation of exogenous antigen	2/18	176/17910	0.0132489910256078	0.0427954134897951	0.0239432161990491	KIF23/KIF4A	2	BP
GO:2000045	regulation of G1/S transition of mitotic cell cycle	2/18	177/17910	0.013392474039222	0.0430683085842823	0.0240958957904853	AURKA/GTSE1	2	BP							GO:2000045	regulation of G1/S transition of mitotic cell cycle	2/18	177/17910	0.013392474039222	0.0430683085842823	0.0240958957904853	AURKA/GTSE1	2	BP
GO:0072425	signal transduction involved in G2 DNA damage checkpoint	1/18	14/17910	0.0139838460820711	0.0445773259384801	0.0249401621688973	DTL	1	BP							GO:0072425	signal transduction involved in G2 DNA damage checkpoint	1/18	14/17910	0.0139838460820711	0.0445773259384801	0.0249401621688973	DTL	1	BP
GO:0090128	regulation of synapse maturation	1/18	14/17910	0.0139838460820711	0.0445773259384801	0.0249401621688973	CDC20	1	BP							GO:0090128	regulation of synapse maturation	1/18	14/17910	0.0139838460820711	0.0445773259384801	0.0249401621688973	CDC20	1	BP
GO:0001325	formation of extrachromosomal circular DNA	1/18	15/17910	0.0149755923253952	0.0470449031146732	0.026320724453487	EXO1	1	BP							GO:0001325	formation of extrachromosomal circular DNA	1/18	15/17910	0.0149755923253952	0.0470449031146732	0.026320724453487	EXO1	1	BP
GO:0090656	t-circle formation	1/18	15/17910	0.0149755923253952	0.0470449031146732	0.026320724453487	EXO1	1	BP							GO:0090656	t-circle formation	1/18	15/17910	0.0149755923253952	0.0470449031146732	0.026320724453487	EXO1	1	BP
GO:0090737	telomere maintenance via telomere trimming	1/18	15/17910	0.0149755923253952	0.0470449031146732	0.026320724453487	EXO1	1	BP							GO:0090737	telomere maintenance via telomere trimming	1/18	15/17910	0.0149755923253952	0.0470449031146732	0.026320724453487	EXO1	1	BP
GO:0048002	antigen processing and presentation of peptide antigen	2/18	188/17910	0.0150157019530395	0.0470449031146732	0.026320724453487	KIF23/KIF4A	2	BP							GO:0048002	antigen processing and presentation of peptide antigen	2/18	188/17910	0.0150157019530395	0.0470449031146732	0.026320724453487	KIF23/KIF4A	2	BP
GO:0097431	mitotic spindle pole	1/18	26/18675	0.0247770148042906	0.0475231267557705	0.0205228077757714	AURKA	1	CC							GO:0097431	mitotic spindle pole	1/18	26/18675	0.0247770148042906	0.0475231267557705	0.0205228077757714	AURKA	1	CC
GO:0051233	spindle midzone	1/18	27/18675	0.0257182992556564	0.0485329195630935	0.0209588856412819	AURKB	1	CC							GO:0051233	spindle midzone	1/18	27/18675	0.0257182992556564	0.0485329195630935	0.0209588856412819	AURKB	1	CC
GO:0045732	positive regulation of protein catabolic process	2/18	192/17910	0.0156261664199312	0.0487482969510675	0.027273740759934	AURKA/DTL	2	BP							GO:0045732	positive regulation of protein catabolic process	2/18	192/17910	0.0156261664199312	0.0487482969510675	0.027273740759934	AURKA/DTL	2	BP
GO:0004712	protein serine/threonine/tyrosine kinase activity	2/18	40/16967	0.000809577827669791	0.0490503503067565	0.0252891172365662	AURKA/AURKB	2	MF							GO:0004712	protein serine/threonine/tyrosine kinase activity	2/18	40/16967	0.000809577827669791	0.0490503503067565	0.0252891172365662	AURKA/AURKB	2	MF
GO:0005524	ATP binding	6/18	1451/16967	0.00292097287838293	0.0490503503067565	0.0252891172365662	KIF23/KIF4A/TRIP13/AURKA/AURKB/BUB1	6	MF							GO:0005524	ATP binding	6/18	1451/16967	0.00292097287838293	0.0490503503067565	0.0252891172365662	KIF23/KIF4A/TRIP13/AURKA/AURKB/BUB1	6	MF
GO:0008309	double-stranded DNA exodeoxyribonuclease activity	1/18	3/16967	0.00317946064676877	0.0490503503067565	0.0252891172365662	EXO1	1	MF							GO:0008309	double-stranded DNA exodeoxyribonuclease activity	1/18	3/16967	0.00317946064676877	0.0490503503067565	0.0252891172365662	EXO1	1	MF
GO:0032559	adenyl ribonucleotide binding	6/18	1502/16967	0.00347929341837493	0.0490503503067565	0.0252891172365662	KIF23/KIF4A/TRIP13/AURKA/AURKB/BUB1	6	MF							GO:0032559	adenyl ribonucleotide binding	6/18	1502/16967	0.00347929341837493	0.0490503503067565	0.0252891172365662	KIF23/KIF4A/TRIP13/AURKA/AURKB/BUB1	6	MF
GO:0030554	adenyl nucleotide binding	6/18	1509/16967	0.00356184807604122	0.0490503503067565	0.0252891172365662	KIF23/KIF4A/TRIP13/AURKA/AURKB/BUB1	6	MF							GO:0030554	adenyl nucleotide binding	6/18	1509/16967	0.00356184807604122	0.0490503503067565	0.0252891172365662	KIF23/KIF4A/TRIP13/AURKA/AURKB/BUB1	6	MF
GO:0051087	chaperone binding	2/18	91/16967	0.00411640710960381	0.0490503503067565	0.0252891172365662	BIRC5/CDC25A	2	MF							GO:0051087	chaperone binding	2/18	91/16967	0.00411640710960381	0.0490503503067565	0.0252891172365662	BIRC5/CDC25A	2	MF
GO:0035174	histone serine kinase activity	1/18	4/16967	0.0042371575171033	0.0490503503067565	0.0252891172365662	AURKB	1	MF							GO:0035174	histone serine kinase activity	1/18	4/16967	0.0042371575171033	0.0490503503067565	0.0252891172365662	AURKB	1	MF
GO:0035312	5'-3' exodeoxyribonuclease activity	1/18	4/16967	0.0042371575171033	0.0490503503067565	0.0252891172365662	EXO1	1	MF							GO:0035312	5'-3' exodeoxyribonuclease activity	1/18	4/16967	0.0042371575171033	0.0490503503067565	0.0252891172365662	EXO1	1	MF
GO:0008144	drug binding	6/18	1658/16967	0.00569870502457213	0.0490503503067565	0.0252891172365662	KIF23/KIF4A/TRIP13/AURKA/AURKB/BUB1	6	MF							GO:0008144	drug binding	6/18	1658/16967	0.00569870502457213	0.0490503503067565	0.0252891172365662	KIF23/KIF4A/TRIP13/AURKA/AURKB/BUB1	6	MF
GO:0008297	single-stranded DNA exodeoxyribonuclease activity	1/18	6/16967	0.00634937224584564	0.0490503503067565	0.0252891172365662	EXO1	1	MF							GO:0008297	single-stranded DNA exodeoxyribonuclease activity	1/18	6/16967	0.00634937224584564	0.0490503503067565	0.0252891172365662	EXO1	1	MF
GO:0004674	protein serine/threonine kinase activity	3/18	371/16967	0.0066298586862768	0.0490503503067565	0.0252891172365662	AURKA/AURKB/BUB1	3	MF							GO:0004674	protein serine/threonine kinase activity	3/18	371/16967	0.0066298586862768	0.0490503503067565	0.0252891172365662	AURKA/AURKB/BUB1	3	MF
GO:0035639	purine ribonucleoside triphosphate binding	6/18	1732/16967	0.00706239050927789	0.0490503503067565	0.0252891172365662	KIF23/KIF4A/TRIP13/AURKA/AURKB/BUB1	6	MF							GO:0035639	purine ribonucleoside triphosphate binding	6/18	1732/16967	0.00706239050927789	0.0490503503067565	0.0252891172365662	KIF23/KIF4A/TRIP13/AURKA/AURKB/BUB1	6	MF
GO:0097027	ubiquitin-protein transferase activator activity	1/18	7/16967	0.00740389210314019	0.0490503503067565	0.0252891172365662	CDC20	1	MF							GO:0097027	ubiquitin-protein transferase activator activity	1/18	7/16967	0.00740389210314019	0.0490503503067565	0.0252891172365662	CDC20	1	MF
GO:0032555	purine ribonucleotide binding	6/18	1790/16967	0.00829058323391294	0.0490503503067565	0.0252891172365662	KIF23/KIF4A/TRIP13/AURKA/AURKB/BUB1	6	MF							GO:0032555	purine ribonucleotide binding	6/18	1790/16967	0.00829058323391294	0.0490503503067565	0.0252891172365662	KIF23/KIF4A/TRIP13/AURKA/AURKB/BUB1	6	MF
GO:0010997	anaphase-promoting complex binding	1/18	8/16967	0.00845735495350186	0.0490503503067565	0.0252891172365662	CDC20	1	MF							GO:0010997	anaphase-promoting complex binding	1/18	8/16967	0.00845735495350186	0.0490503503067565	0.0252891172365662	CDC20	1	MF
GO:0017076	purine nucleotide binding	6/18	1798/16967	0.00847164282500869	0.0490503503067565	0.0252891172365662	KIF23/KIF4A/TRIP13/AURKA/AURKB/BUB1	6	MF							GO:0017076	purine nucleotide binding	6/18	1798/16967	0.00847164282500869	0.0490503503067565	0.0252891172365662	KIF23/KIF4A/TRIP13/AURKA/AURKB/BUB1	6	MF
GO:0032553	ribonucleotide binding	6/18	1804/16967	0.00860934598141638	0.0490503503067565	0.0252891172365662	KIF23/KIF4A/TRIP13/AURKA/AURKB/BUB1	6	MF							GO:0032553	ribonucleotide binding	6/18	1804/16967	0.00860934598141638	0.0490503503067565	0.0252891172365662	KIF23/KIF4A/TRIP13/AURKA/AURKB/BUB1	6	MF
GO:0140096	catalytic activity, acting on a protein	6/18	1837/16967	0.00939649892352367	0.0490503503067565	0.0252891172365662	AURKA/AURKB/BUB1/CDC25A/DLGAP5/DTL	6	MF							GO:0140096	catalytic activity, acting on a protein	6/18	1837/16967	0.00939649892352367	0.0490503503067565	0.0252891172365662	AURKA/AURKB/BUB1/CDC25A/DLGAP5/DTL	6	MF
GO:0048256	flap endonuclease activity	1/18	9/16967	0.00950976179416707	0.0490503503067565	0.0252891172365662	EXO1	1	MF							GO:0048256	flap endonuclease activity	1/18	9/16967	0.00950976179416707	0.0490503503067565	0.0252891172365662	EXO1	1	MF
GO:0044265	cellular macromolecule catabolic process	4/18	1003/17910	0.015926659256059	0.0491791957352729	0.0275148203969515	AURKA/AURKB/CDC20/DTL	4	BP							GO:0044265	cellular macromolecule catabolic process	4/18	1003/17910	0.015926659256059	0.0491791957352729	0.0275148203969515	AURKA/AURKB/CDC20/DTL	4	BP
GO:0034501	protein localization to kinetochore	1/18	16/17910	0.0159663964236434	0.0491791957352729	0.0275148203969515	AURKB	1	BP							GO:0034501	protein localization to kinetochore	1/18	16/17910	0.0159663964236434	0.0491791957352729	0.0275148203969515	AURKB	1	BP
GO:0051382	kinetochore assembly	1/18	16/17910	0.0159663964236434	0.0491791957352729	0.0275148203969515	CENPF	1	BP							GO:0051382	kinetochore assembly	1/18	16/17910	0.0159663964236434	0.0491791957352729	0.0275148203969515	CENPF	1	BP
GO:1902806	regulation of cell cycle G1/S phase transition	2/18	195/17910	0.016091000155767	0.0493547483769325	0.0276130387458541	AURKA/GTSE1	2	BP							GO:1902806	regulation of cell cycle G1/S phase transition	2/18	195/17910	0.016091000155767	0.0493547483769325	0.0276130387458541	AURKA/GTSE1	2	BP
GO:0090543	Flemming body	1/18	28/18675	0.0266587256077266	0.0495090618429209	0.021380431565094	KIF23	1	CC							GO:0090543	Flemming body	1/18	28/18675	0.0266587256077266	0.0495090618429209	0.021380431565094	KIF23	1	CC
GO:0000307	cyclin-dependent protein kinase holoenzyme complex	1/18	29/18675	0.0275982945967896	0.0496769302742214	0.0214529253545895	CCNE2	1	CC							GO:0000307	cyclin-dependent protein kinase holoenzyme complex	1/18	29/18675	0.0275982945967896	0.0496769302742214	0.0214529253545895	CCNE2	1	CC
GO:0080008	Cul4-RING E3 ubiquitin ligase complex	1/18	29/18675	0.0275982945967896	0.0496769302742214	0.0214529253545895	DTL	1	CC							GO:0080008	Cul4-RING E3 ubiquitin ligase complex	1/18	29/18675	0.0275982945967896	0.0496769302742214	0.0214529253545895	DTL	1	CC
GO:0048471	perinuclear region of cytoplasm	3/18	705/18675	0.0286379540188472	0.05076728212432	0.0219237925503136	CENPF/AURKA/CDC20	3	CC							GO:0048471	perinuclear region of cytoplasm	3/18	705/18675	0.0286379540188472	0.05076728212432	0.0219237925503136	CENPF/AURKA/CDC20	3	CC
GO:0032991	protein-containing complex	9/18	4980/18675	0.0291315449703655	0.0508715039034741	0.0219688006060887	CCNE2/CENPF/KIF23/ASF1B/AURKB/BIRC5/BUB1/CDC20/DTL	9	CC							GO:0032991	protein-containing complex	9/18	4980/18675	0.0291315449703655	0.0508715039034741	0.0219688006060887	CCNE2/CENPF/KIF23/ASF1B/AURKB/BIRC5/BUB1/CDC20/DTL	9	CC
GO:0002902	regulation of B cell apoptotic process	1/18	17/17910	0.0169562592192383	0.0515752884585164	0.0288553884958967	AURKB	1	BP							GO:0002902	regulation of B cell apoptotic process	1/18	17/17910	0.0169562592192383	0.0515752884585164	0.0288553884958967	AURKB	1	BP
GO:1904355	positive regulation of telomere capping	1/18	17/17910	0.0169562592192383	0.0515752884585164	0.0288553884958967	AURKB	1	BP							GO:1904355	positive regulation of telomere capping	1/18	17/17910	0.0169562592192383	0.0515752884585164	0.0288553884958967	AURKB	1	BP
GO:0004523	RNA-DNA hybrid ribonuclease activity	1/18	10/16967	0.0105611136214876	0.0517494567452892	0.0266807080963897	EXO1	1	MF							GO:0004523	RNA-DNA hybrid ribonuclease activity	1/18	10/16967	0.0105611136214876	0.0517494567452892	0.0266807080963897	EXO1	1	MF
GO:0004721	phosphoprotein phosphatase activity	2/18	157/16967	0.0118116214118193	0.0529664690297379	0.0273081687801012	CDC25A/DLGAP5	2	MF							GO:0004721	phosphoprotein phosphatase activity	2/18	157/16967	0.0118116214118193	0.0529664690297379	0.0273081687801012	CDC25A/DLGAP5	2	MF
GO:0008017	microtubule binding	2/18	166/16967	0.0131350928418356	0.0529664690297379	0.0273081687801012	KIF23/BIRC5	2	MF							GO:0008017	microtubule binding	2/18	166/16967	0.0131350928418356	0.0529664690297379	0.0273081687801012	KIF23/BIRC5	2	MF
GO:0000166	nucleotide binding	6/18	2012/16967	0.0144831930569315	0.0529664690297379	0.0273081687801012	KIF23/KIF4A/TRIP13/AURKA/AURKB/BUB1	6	MF							GO:0000166	nucleotide binding	6/18	2012/16967	0.0144831930569315	0.0529664690297379	0.0273081687801012	KIF23/KIF4A/TRIP13/AURKA/AURKB/BUB1	6	MF
GO:1901265	nucleoside phosphate binding	6/18	2013/16967	0.0145169995664398	0.0529664690297379	0.0273081687801012	KIF23/KIF4A/TRIP13/AURKA/AURKB/BUB1	6	MF							GO:1901265	nucleoside phosphate binding	6/18	2013/16967	0.0145169995664398	0.0529664690297379	0.0273081687801012	KIF23/KIF4A/TRIP13/AURKA/AURKB/BUB1	6	MF
GO:0004529	exodeoxyribonuclease activity	1/18	14/16967	0.0147559906935575	0.0529664690297379	0.0273081687801012	EXO1	1	MF							GO:0004529	exodeoxyribonuclease activity	1/18	14/16967	0.0147559906935575	0.0529664690297379	0.0273081687801012	EXO1	1	MF
GO:0016895	exodeoxyribonuclease activity, producing 5'-phosphomonoesters	1/18	14/16967	0.0147559906935575	0.0529664690297379	0.0273081687801012	EXO1	1	MF							GO:0016895	exodeoxyribonuclease activity, producing 5'-phosphomonoesters	1/18	14/16967	0.0147559906935575	0.0529664690297379	0.0273081687801012	EXO1	1	MF
GO:0035173	histone kinase activity	1/18	14/16967	0.0147559906935575	0.0529664690297379	0.0273081687801012	AURKB	1	MF							GO:0035173	histone kinase activity	1/18	14/16967	0.0147559906935575	0.0529664690297379	0.0273081687801012	AURKB	1	MF
GO:0008022	protein C-terminus binding	2/18	186/16967	0.0162966134697371	0.0529664690297379	0.0273081687801012	CENPF/CDC20	2	MF							GO:0008022	protein C-terminus binding	2/18	186/16967	0.0162966134697371	0.0529664690297379	0.0273081687801012	CENPF/CDC20	2	MF
GO:0004672	protein kinase activity	3/18	517/16967	0.0163224624429925	0.0529664690297379	0.0273081687801012	AURKA/AURKB/BUB1	3	MF							GO:0004672	protein kinase activity	3/18	517/16967	0.0163224624429925	0.0529664690297379	0.0273081687801012	AURKA/AURKB/BUB1	3	MF
GO:0008409	5'-3' exonuclease activity	1/18	16/16967	0.0168471249899946	0.0529664690297379	0.0273081687801012	EXO1	1	MF							GO:0008409	5'-3' exonuclease activity	1/18	16/16967	0.0168471249899946	0.0529664690297379	0.0273081687801012	EXO1	1	MF
GO:0055106	ubiquitin-protein transferase regulator activity	1/18	16/16967	0.0168471249899946	0.0529664690297379	0.0273081687801012	CDC20	1	MF							GO:0055106	ubiquitin-protein transferase regulator activity	1/18	16/16967	0.0168471249899946	0.0529664690297379	0.0273081687801012	CDC20	1	MF
GO:0097367	carbohydrate derivative binding	6/18	2090/16967	0.0172951735607307	0.0529664690297379	0.0273081687801012	KIF23/KIF4A/TRIP13/AURKA/AURKB/BUB1	6	MF							GO:0097367	carbohydrate derivative binding	6/18	2090/16967	0.0172951735607307	0.0529664690297379	0.0273081687801012	KIF23/KIF4A/TRIP13/AURKA/AURKB/BUB1	6	MF
GO:0007130	synaptonemal complex assembly	1/18	18/17910	0.0179451815538968	0.0539093931454513	0.0301612754728696	TRIP13	1	BP							GO:0007130	synaptonemal complex assembly	1/18	18/17910	0.0179451815538968	0.0539093931454513	0.0301612754728696	TRIP13	1	BP
GO:0007221	positive regulation of transcription of Notch receptor target	1/18	18/17910	0.0179451815538968	0.0539093931454513	0.0301612754728696	DLGAP5	1	BP							GO:0007221	positive regulation of transcription of Notch receptor target	1/18	18/17910	0.0179451815538968	0.0539093931454513	0.0301612754728696	DLGAP5	1	BP
GO:0051782	negative regulation of cell division	1/18	18/17910	0.0179451815538968	0.0539093931454513	0.0301612754728696	AURKB	1	BP							GO:0051782	negative regulation of cell division	1/18	18/17910	0.0179451815538968	0.0539093931454513	0.0301612754728696	AURKB	1	BP
GO:0046777	protein autophosphorylation	2/18	210/17910	0.0185036668485049	0.0551043080363033	0.0308298075242764	AURKA/AURKB	2	BP							GO:0046777	protein autophosphorylation	2/18	210/17910	0.0185036668485049	0.0551043080363033	0.0308298075242764	AURKA/AURKB	2	BP
GO:0065004	protein-DNA complex assembly	2/18	210/17910	0.0185036668485049	0.0551043080363033	0.0308298075242764	CENPF/ASF1B	2	BP							GO:0065004	protein-DNA complex assembly	2/18	210/17910	0.0185036668485049	0.0551043080363033	0.0308298075242764	CENPF/ASF1B	2	BP
GO:0070647	protein modification by small protein conjugation or removal	4/18	1050/17910	0.0185693969546995	0.0551043080363033	0.0308298075242764	CDC20/CDC25A/CDCA3/DTL	4	BP							GO:0070647	protein modification by small protein conjugation or removal	4/18	1050/17910	0.0185693969546995	0.0551043080363033	0.0308298075242764	CDC20/CDC25A/CDCA3/DTL	4	BP
GO:0016310	phosphorylation	6/18	2243/17910	0.0186751022093568	0.0551936219142933	0.0308797769325822	CCNE2/AURKA/AURKB/BIRC5/BUB1/CDC25A	6	BP							GO:0016310	phosphorylation	6/18	2243/17910	0.0186751022093568	0.0551936219142933	0.0308797769325822	CCNE2/AURKA/AURKB/BIRC5/BUB1/CDC25A	6	BP
GO:0043393	regulation of protein binding	2/18	217/17910	0.0196792109719649	0.0579267097158645	0.0324088873392292	AURKA/AURKB	2	BP							GO:0043393	regulation of protein binding	2/18	217/17910	0.0196792109719649	0.0579267097158645	0.0324088873392292	AURKA/AURKB	2	BP
GO:0051383	kinetochore organization	1/18	20/17910	0.0199202082037475	0.0584006103965289	0.032674025715722	CENPF	1	BP							GO:0051383	kinetochore organization	1/18	20/17910	0.0199202082037475	0.0584006103965289	0.032674025715722	CENPF	1	BP
GO:0010638	positive regulation of organelle organization	3/18	591/17910	0.0201616136629308	0.0587272538388024	0.0328567764808296	AURKA/AURKB/DLGAP5	3	BP							GO:0010638	positive regulation of organelle organization	3/18	591/17910	0.0201616136629308	0.0587272538388024	0.0328567764808296	AURKA/AURKB/DLGAP5	3	BP
GO:0019882	antigen processing and presentation	2/18	220/17910	0.0201925215253964	0.0587272538388024	0.0328567764808296	KIF23/KIF4A	2	BP							GO:0019882	antigen processing and presentation	2/18	220/17910	0.0201925215253964	0.0587272538388024	0.0328567764808296	KIF23/KIF4A	2	BP
GO:0007063	regulation of sister chromatid cohesion	1/18	21/17910	0.0209063141988473	0.0598494484908176	0.0334846229479989	BUB1	1	BP							GO:0007063	regulation of sister chromatid cohesion	1/18	21/17910	0.0209063141988473	0.0598494484908176	0.0334846229479989	BUB1	1	BP
GO:0046827	positive regulation of protein export from nucleus	1/18	21/17910	0.0209063141988473	0.0598494484908176	0.0334846229479989	GTSE1	1	BP							GO:0046827	positive regulation of protein export from nucleus	1/18	21/17910	0.0209063141988473	0.0598494484908176	0.0334846229479989	GTSE1	1	BP
GO:0070193	synaptonemal complex organization	1/18	21/17910	0.0209063141988473	0.0598494484908176	0.0334846229479989	TRIP13	1	BP							GO:0070193	synaptonemal complex organization	1/18	21/17910	0.0209063141988473	0.0598494484908176	0.0334846229479989	TRIP13	1	BP
GO:0071459	protein localization to chromosome, centromeric region	1/18	21/17910	0.0209063141988473	0.0598494484908176	0.0334846229479989	AURKB	1	BP							GO:0071459	protein localization to chromosome, centromeric region	1/18	21/17910	0.0209063141988473	0.0598494484908176	0.0334846229479989	AURKB	1	BP
GO:0000152	nuclear ubiquitin ligase complex	1/18	38/18675	0.0360159553579669	0.0619686290717959	0.0267610813805327	CDC20	1	CC							GO:0000152	nuclear ubiquitin ligase complex	1/18	38/18675	0.0360159553579669	0.0619686290717959	0.0267610813805327	CDC20	1	CC
GO:1903429	regulation of cell maturation	1/18	22/17910	0.0218914830928281	0.0621820336877996	0.0347896597993745	AURKA	1	BP							GO:1903429	regulation of cell maturation	1/18	22/17910	0.0218914830928281	0.0621820336877996	0.0347896597993745	AURKA	1	BP
GO:1904666	regulation of ubiquitin protein ligase activity	1/18	22/17910	0.0218914830928281	0.0621820336877996	0.0347896597993745	CDC20	1	BP							GO:1904666	regulation of ubiquitin protein ligase activity	1/18	22/17910	0.0218914830928281	0.0621820336877996	0.0347896597993745	CDC20	1	BP
GO:0007050	cell cycle arrest	2/18	231/17910	0.022122763467127	0.0623537348687363	0.0348857233295886	AURKA/GTSE1	2	BP							GO:0007050	cell cycle arrest	2/18	231/17910	0.022122763467127	0.0623537348687363	0.0348857233295886	AURKA/GTSE1	2	BP
GO:0018105	peptidyl-serine phosphorylation	2/18	231/17910	0.022122763467127	0.0623537348687363	0.0348857233295886	AURKA/AURKB	2	BP							GO:0018105	peptidyl-serine phosphorylation	2/18	231/17910	0.022122763467127	0.0623537348687363	0.0348857233295886	AURKA/AURKB	2	BP
GO:0048523	negative regulation of cellular process	9/18	4580/17910	0.0223279956942713	0.0626901417569924	0.0350739365561832	CENPF/TRIP13/AURKA/AURKB/BIRC5/BUB1/CDC20/DTL/GTSE1	9	BP							GO:0048523	negative regulation of cellular process	9/18	4580/17910	0.0223279956942713	0.0626901417569924	0.0350739365561832	CENPF/TRIP13/AURKA/AURKB/BIRC5/BUB1/CDC20/DTL/GTSE1	9	BP
GO:0001783	B cell apoptotic process	1/18	23/17910	0.0228757157238839	0.0634953326176246	0.0355244254587431	AURKB	1	BP							GO:0001783	B cell apoptotic process	1/18	23/17910	0.0228757157238839	0.0634953326176246	0.0355244254587431	AURKB	1	BP
GO:0007064	mitotic sister chromatid cohesion	1/18	23/17910	0.0228757157238839	0.0634953326176246	0.0355244254587431	CDC20	1	BP							GO:0007064	mitotic sister chromatid cohesion	1/18	23/17910	0.0228757157238839	0.0634953326176246	0.0355244254587431	CDC20	1	BP
GO:0007141	male meiosis I	1/18	23/17910	0.0228757157238839	0.0634953326176246	0.0355244254587431	TRIP13	1	BP							GO:0007141	male meiosis I	1/18	23/17910	0.0228757157238839	0.0634953326176246	0.0355244254587431	TRIP13	1	BP
GO:1901565	organonitrogen compound catabolic process	4/18	1123/17910	0.0232016447938862	0.0641560632558217	0.0358940916269053	AURKA/AURKB/CDC20/DTL	4	BP							GO:1901565	organonitrogen compound catabolic process	4/18	1123/17910	0.0232016447938862	0.0641560632558217	0.0358940916269053	AURKA/AURKB/CDC20/DTL	4	BP
GO:0007281	germ cell development	2/18	238/17910	0.0233898939796159	0.0644325381325267	0.0360487740380971	TRIP13/AURKA	2	BP							GO:0007281	germ cell development	2/18	238/17910	0.0233898939796159	0.0644325381325267	0.0360487740380971	TRIP13/AURKA	2	BP
GO:0071824	protein-DNA complex subunit organization	2/18	240/17910	0.0237573974277716	0.0647475072064676	0.0362249932171729	CENPF/ASF1B	2	BP							GO:0071824	protein-DNA complex subunit organization	2/18	240/17910	0.0237573974277716	0.0647475072064676	0.0362249932171729	CENPF/ASF1B	2	BP
GO:0010971	positive regulation of G2/M transition of mitotic cell cycle	1/18	24/17910	0.0238590129295065	0.0647475072064676	0.0362249932171729	DTL	1	BP							GO:0010971	positive regulation of G2/M transition of mitotic cell cycle	1/18	24/17910	0.0238590129295065	0.0647475072064676	0.0362249932171729	DTL	1	BP
GO:0051642	centrosome localization	1/18	24/17910	0.0238590129295065	0.0647475072064676	0.0362249932171729	AURKA	1	BP							GO:0051642	centrosome localization	1/18	24/17910	0.0238590129295065	0.0647475072064676	0.0362249932171729	AURKA	1	BP
GO:0051984	positive regulation of chromosome segregation	1/18	24/17910	0.0238590129295065	0.0647475072064676	0.0362249932171729	DLGAP5	1	BP							GO:0051984	positive regulation of chromosome segregation	1/18	24/17910	0.0238590129295065	0.0647475072064676	0.0362249932171729	DLGAP5	1	BP
GO:0006310	DNA recombination	2/18	244/17910	0.0244996272386581	0.0662397329045202	0.0370598649847928	TRIP13/EXO1	2	BP							GO:0006310	DNA recombination	2/18	244/17910	0.0244996272386581	0.0662397329045202	0.0370598649847928	TRIP13/EXO1	2	BP
GO:0070840	dynein complex binding	1/18	22/16967	0.0230954059801206	0.0665902115794371	0.0343322250892909	CENPF	1	MF							GO:0070840	dynein complex binding	1/18	22/16967	0.0230954059801206	0.0665902115794371	0.0343322250892909	CENPF	1	MF
GO:0016791	phosphatase activity	2/18	224/16967	0.0231027264663353	0.0665902115794371	0.0343322250892909	CDC25A/DLGAP5	2	MF							GO:0016791	phosphatase activity	2/18	224/16967	0.0231027264663353	0.0665902115794371	0.0343322250892909	CDC25A/DLGAP5	2	MF
GO:0061842	microtubule organizing center localization	1/18	25/17910	0.0248413755464842	0.0669158824683893	0.0374381577472748	AURKA	1	BP							GO:0061842	microtubule organizing center localization	1/18	25/17910	0.0248413755464842	0.0669158824683893	0.0374381577472748	AURKA	1	BP
GO:0006796	phosphate-containing compound metabolic process	7/18	3115/17910	0.0256369817015661	0.0685478080725848	0.0383511889432774	CCNE2/AURKA/AURKB/BIRC5/BUB1/CDC25A/DLGAP5	7	BP							GO:0006796	phosphate-containing compound metabolic process	7/18	3115/17910	0.0256369817015661	0.0685478080725848	0.0383511889432774	CCNE2/AURKA/AURKB/BIRC5/BUB1/CDC25A/DLGAP5	7	BP
GO:0021591	ventricular system development	1/18	26/17910	0.0258228044109052	0.0685478080725848	0.0383511889432774	CENPF	1	BP							GO:0021591	ventricular system development	1/18	26/17910	0.0258228044109052	0.0685478080725848	0.0383511889432774	CENPF	1	BP
GO:0060074	synapse maturation	1/18	26/17910	0.0258228044109052	0.0685478080725848	0.0383511889432774	CDC20	1	BP							GO:0060074	synapse maturation	1/18	26/17910	0.0258228044109052	0.0685478080725848	0.0383511889432774	CDC20	1	BP
GO:1904353	regulation of telomere capping	1/18	26/17910	0.0258228044109052	0.0685478080725848	0.0383511889432774	AURKB	1	BP							GO:1904353	regulation of telomere capping	1/18	26/17910	0.0258228044109052	0.0685478080725848	0.0383511889432774	AURKB	1	BP
GO:0018209	peptidyl-serine modification	2/18	252/17910	0.0260126991932705	0.0688017043879979	0.0384932390808121	AURKA/AURKB	2	BP							GO:0018209	peptidyl-serine modification	2/18	252/17910	0.0260126991932705	0.0688017043879979	0.0384932390808121	AURKA/AURKB	2	BP
GO:0006793	phosphorus metabolic process	7/18	3139/17910	0.0266601298903859	0.0688958072586359	0.0385458878390061	CCNE2/AURKA/AURKB/BIRC5/BUB1/CDC25A/DLGAP5	7	BP							GO:0006793	phosphorus metabolic process	7/18	3139/17910	0.0266601298903859	0.0688958072586359	0.0385458878390061	CCNE2/AURKA/AURKB/BIRC5/BUB1/CDC25A/DLGAP5	7	BP
GO:0007276	gamete generation	3/18	658/17910	0.0266925297186629	0.0688958072586359	0.0385458878390061	TRIP13/ASF1B/AURKA	3	BP							GO:0007276	gamete generation	3/18	658/17910	0.0266925297186629	0.0688958072586359	0.0385458878390061	TRIP13/ASF1B/AURKA	3	BP
GO:0001835	blastocyst hatching	1/18	27/17910	0.0268033003581543	0.0688958072586359	0.0385458878390061	ASF1B	1	BP							GO:0001835	blastocyst hatching	1/18	27/17910	0.0268033003581543	0.0688958072586359	0.0385458878390061	ASF1B	1	BP
GO:0006298	mismatch repair	1/18	27/17910	0.0268033003581543	0.0688958072586359	0.0385458878390061	EXO1	1	BP							GO:0006298	mismatch repair	1/18	27/17910	0.0268033003581543	0.0688958072586359	0.0385458878390061	EXO1	1	BP
GO:0035188	hatching	1/18	27/17910	0.0268033003581543	0.0688958072586359	0.0385458878390061	ASF1B	1	BP							GO:0035188	hatching	1/18	27/17910	0.0268033003581543	0.0688958072586359	0.0385458878390061	ASF1B	1	BP
GO:0040020	regulation of meiotic nuclear division	1/18	27/17910	0.0268033003581543	0.0688958072586359	0.0385458878390061	CDC20	1	BP							GO:0040020	regulation of meiotic nuclear division	1/18	27/17910	0.0268033003581543	0.0688958072586359	0.0385458878390061	CDC20	1	BP
GO:0071684	organism emergence from protective structure	1/18	27/17910	0.0268033003581543	0.0688958072586359	0.0385458878390061	ASF1B	1	BP							GO:0071684	organism emergence from protective structure	1/18	27/17910	0.0268033003581543	0.0688958072586359	0.0385458878390061	ASF1B	1	BP
GO:1902751	positive regulation of cell cycle G2/M phase transition	1/18	27/17910	0.0268033003581543	0.0688958072586359	0.0385458878390061	DTL	1	BP							GO:1902751	positive regulation of cell cycle G2/M phase transition	1/18	27/17910	0.0268033003581543	0.0688958072586359	0.0385458878390061	DTL	1	BP
GO:0016773	phosphotransferase activity, alcohol group as acceptor	3/18	611/16967	0.0253370700816108	0.0702332779514929	0.0362104977623164	AURKA/AURKB/BUB1	3	MF							GO:0016773	phosphotransferase activity, alcohol group as acceptor	3/18	611/16967	0.0253370700816108	0.0702332779514929	0.0362104977623164	AURKA/AURKB/BUB1	3	MF
GO:0016788	hydrolase activity, acting on ester bonds	3/18	621/16967	0.0264279171047967	0.0702332779514929	0.0362104977623164	CDC25A/DLGAP5/EXO1	3	MF							GO:0016788	hydrolase activity, acting on ester bonds	3/18	621/16967	0.0264279171047967	0.0702332779514929	0.0362104977623164	CDC25A/DLGAP5/EXO1	3	MF
GO:0015631	tubulin binding	2/18	252/16967	0.0287477175104683	0.0702332779514929	0.0362104977623164	KIF23/BIRC5	2	MF							GO:0015631	tubulin binding	2/18	252/16967	0.0287477175104683	0.0702332779514929	0.0362104977623164	KIF23/BIRC5	2	MF
GO:0036094	small molecule binding	6/18	2340/16967	0.0289214452129924	0.0702332779514929	0.0362104977623164	KIF23/KIF4A/TRIP13/AURKA/AURKB/BUB1	6	MF							GO:0036094	small molecule binding	6/18	2340/16967	0.0289214452129924	0.0702332779514929	0.0362104977623164	KIF23/KIF4A/TRIP13/AURKA/AURKB/BUB1	6	MF
GO:0004520	endodeoxyribonuclease activity	1/18	28/16967	0.0293061698136973	0.0702332779514929	0.0362104977623164	EXO1	1	MF							GO:0004520	endodeoxyribonuclease activity	1/18	28/16967	0.0293061698136973	0.0702332779514929	0.0362104977623164	EXO1	1	MF
GO:0008536	Ran GTPase binding	1/18	28/16967	0.0293061698136973	0.0702332779514929	0.0362104977623164	BIRC5	1	MF							GO:0008536	Ran GTPase binding	1/18	28/16967	0.0293061698136973	0.0702332779514929	0.0362104977623164	BIRC5	1	MF
GO:0019900	kinase binding	3/18	647/16967	0.0293833101633797	0.0702332779514929	0.0362104977623164	AURKA/AURKB/CDC25A	3	MF							GO:0019900	kinase binding	3/18	647/16967	0.0293833101633797	0.0702332779514929	0.0362104977623164	AURKA/AURKB/CDC25A	3	MF
GO:0016579	protein deubiquitination	2/18	260/17910	0.0275633927533573	0.0706009709121082	0.0394998943242941	CDC20/CDC25A	2	BP							GO:0016579	protein deubiquitination	2/18	260/17910	0.0275633927533573	0.0706009709121082	0.0394998943242941	CDC20/CDC25A	2	BP
GO:0051443	positive regulation of ubiquitin-protein transferase activity	1/18	28/17910	0.0277828642229169	0.0706672156192659	0.0395369569722786	CDC20	1	BP							GO:0051443	positive regulation of ubiquitin-protein transferase activity	1/18	28/17910	0.0277828642229169	0.0706672156192659	0.0395369569722786	CDC20	1	BP
GO:0070229	negative regulation of lymphocyte apoptotic process	1/18	28/17910	0.0277828642229169	0.0706672156192659	0.0395369569722786	AURKB	1	BP							GO:0070229	negative regulation of lymphocyte apoptotic process	1/18	28/17910	0.0277828642229169	0.0706672156192659	0.0395369569722786	AURKB	1	BP
GO:0051130	positive regulation of cellular component organization	4/18	1189/17910	0.0279624363891532	0.070877008903062	0.0396543323062553	AURKA/AURKB/CDC20/DLGAP5	4	BP							GO:0051130	positive regulation of cellular component organization	4/18	1189/17910	0.0279624363891532	0.070877008903062	0.0396543323062553	AURKA/AURKB/CDC20/DLGAP5	4	BP
GO:0008608	attachment of spindle microtubules to kinetochore	1/18	29/17910	0.0287614968391788	0.0726501477252614	0.0406463695997137	AURKB	1	BP							GO:0008608	attachment of spindle microtubules to kinetochore	1/18	29/17910	0.0287614968391788	0.0726501477252614	0.0406463695997137	AURKB	1	BP
GO:0016301	kinase activity	3/18	664/16967	0.03140874055876	0.0732870613037733	0.0377849510481323	AURKA/AURKB/BUB1	3	MF							GO:0016301	kinase activity	3/18	664/16967	0.03140874055876	0.0732870613037733	0.0377849510481323	AURKA/AURKB/BUB1	3	MF
GO:0016891	endoribonuclease activity, producing 5'-phosphomonoesters	1/18	31/16967	0.0323975491194517	0.073836274737355	0.0380681115724279	EXO1	1	MF							GO:0016891	endoribonuclease activity, producing 5'-phosphomonoesters	1/18	31/16967	0.0323975491194517	0.073836274737355	0.0380681115724279	EXO1	1	MF
GO:0006270	DNA replication initiation	1/18	30/17910	0.0297391990402243	0.0743479976005607	0.0415962841658508	CCNE2	1	BP							GO:0006270	DNA replication initiation	1/18	30/17910	0.0297391990402243	0.0743479976005607	0.0415962841658508	CCNE2	1	BP
GO:0031572	G2 DNA damage checkpoint	1/18	30/17910	0.0297391990402243	0.0743479976005607	0.0415962841658508	DTL	1	BP							GO:0031572	G2 DNA damage checkpoint	1/18	30/17910	0.0297391990402243	0.0743479976005607	0.0415962841658508	DTL	1	BP
GO:0071539	protein localization to centrosome	1/18	30/17910	0.0297391990402243	0.0743479976005607	0.0415962841658508	AURKA	1	BP							GO:0071539	protein localization to centrosome	1/18	30/17910	0.0297391990402243	0.0743479976005607	0.0415962841658508	AURKA	1	BP
GO:0031647	regulation of protein stability	2/18	272/17910	0.0299586018474608	0.0746408851489637	0.0417601491532774	AURKA/GTSE1	2	BP							GO:0031647	regulation of protein stability	2/18	272/17910	0.0299586018474608	0.0746408851489637	0.0417601491532774	AURKA/GTSE1	2	BP
GO:0070646	protein modification by small protein removal	2/18	273/17910	0.0301618940556868	0.0748917777573177	0.0419005187741013	CDC20/CDC25A	2	BP							GO:0070646	protein modification by small protein removal	2/18	273/17910	0.0301618940556868	0.0748917777573177	0.0419005187741013	CDC20/CDC25A	2	BP
GO:0030866	cortical actin cytoskeleton organization	1/18	31/17910	0.03071597165864	0.0757522274013758	0.0423819239102146	KIF23	1	BP							GO:0030866	cortical actin cytoskeleton organization	1/18	31/17910	0.03071597165864	0.0757522274013758	0.0423819239102146	KIF23	1	BP
GO:1905508	protein localization to microtubule organizing center	1/18	31/17910	0.03071597165864	0.0757522274013758	0.0423819239102146	AURKA	1	BP							GO:1905508	protein localization to microtubule organizing center	1/18	31/17910	0.03071597165864	0.0757522274013758	0.0423819239102146	AURKA	1	BP
GO:0009057	macromolecule catabolic process	4/18	1226/17910	0.0308759854507814	0.0758904692897995	0.0424592676055403	AURKA/AURKB/CDC20/DTL	4	BP							GO:0009057	macromolecule catabolic process	4/18	1226/17910	0.0308759854507814	0.0758904692897995	0.0424592676055403	AURKA/AURKB/CDC20/DTL	4	BP
GO:0033267	axon part	2/18	354/18675	0.0448884043091988	0.0761151203503805	0.0328702274117703	KIF4A/AURKA	2	CC							GO:0033267	axon part	2/18	354/18675	0.0448884043091988	0.0761151203503805	0.0328702274117703	KIF4A/AURKA	2	CC
GO:0006335	DNA replication-dependent nucleosome assembly	1/18	32/17910	0.0316918155263138	0.0771167511140303	0.0431453488568764	ASF1B	1	BP							GO:0006335	DNA replication-dependent nucleosome assembly	1/18	32/17910	0.0316918155263138	0.0771167511140303	0.0431453488568764	ASF1B	1	BP
GO:0034723	DNA replication-dependent nucleosome organization	1/18	32/17910	0.0316918155263138	0.0771167511140303	0.0431453488568764	ASF1B	1	BP							GO:0034723	DNA replication-dependent nucleosome organization	1/18	32/17910	0.0316918155263138	0.0771167511140303	0.0431453488568764	ASF1B	1	BP
GO:0097421	liver regeneration	1/18	32/17910	0.0316918155263138	0.0771167511140303	0.0431453488568764	AURKA	1	BP							GO:0097421	liver regeneration	1/18	32/17910	0.0316918155263138	0.0771167511140303	0.0431453488568764	AURKA	1	BP
GO:0007131	reciprocal meiotic recombination	1/18	34/17910	0.0336407203334984	0.081316972991569	0.0454952927479867	TRIP13	1	BP							GO:0007131	reciprocal meiotic recombination	1/18	34/17910	0.0336407203334984	0.081316972991569	0.0454952927479867	TRIP13	1	BP
GO:0032212	positive regulation of telomere maintenance via telomerase	1/18	34/17910	0.0336407203334984	0.081316972991569	0.0454952927479867	AURKB	1	BP							GO:0032212	positive regulation of telomere maintenance via telomerase	1/18	34/17910	0.0336407203334984	0.081316972991569	0.0454952927479867	AURKB	1	BP
GO:0006325	chromatin organization	3/18	722/17910	0.0338881671624123	0.0816447591701682	0.0456786828522354	ASF1B/AURKA/AURKB	3	BP							GO:0006325	chromatin organization	3/18	722/17910	0.0338881671624123	0.0816447591701682	0.0456786828522354	ASF1B/AURKA/AURKB	3	BP
GO:0030865	cortical cytoskeleton organization	1/18	35/17910	0.034613782933297	0.0828461034141206	0.0463508120038627	KIF23	1	BP							GO:0030865	cortical cytoskeleton organization	1/18	35/17910	0.034613782933297	0.0828461034141206	0.0463508120038627	KIF23	1	BP
GO:0035825	homologous recombination	1/18	35/17910	0.034613782933297	0.0828461034141206	0.0463508120038627	TRIP13	1	BP							GO:0035825	homologous recombination	1/18	35/17910	0.034613782933297	0.0828461034141206	0.0463508120038627	TRIP13	1	BP
GO:0046825	regulation of protein export from nucleus	1/18	36/17910	0.0355859201029306	0.084617985912506	0.0473421464081504	GTSE1	1	BP							GO:0046825	regulation of protein export from nucleus	1/18	36/17910	0.0355859201029306	0.084617985912506	0.0473421464081504	GTSE1	1	BP
GO:0051973	positive regulation of telomerase activity	1/18	36/17910	0.0355859201029306	0.084617985912506	0.0473421464081504	AURKB	1	BP							GO:0051973	positive regulation of telomerase activity	1/18	36/17910	0.0355859201029306	0.084617985912506	0.0473421464081504	AURKB	1	BP
GO:0033554	cellular response to stress	5/18	1914/17910	0.0362633734082344	0.0859489045065295	0.048086769932997	TRIP13/AURKA/DTL/EXO1/GTSE1	5	BP							GO:0033554	cellular response to stress	5/18	1914/17910	0.0362633734082344	0.0859489045065295	0.048086769932997	TRIP13/AURKA/DTL/EXO1/GTSE1	5	BP
GO:1904358	positive regulation of telomere maintenance via telomere lengthening	1/18	37/17910	0.0365571326708026	0.0863647470863622	0.0483194259113317	AURKB	1	BP							GO:1904358	positive regulation of telomere maintenance via telomere lengthening	1/18	37/17910	0.0365571326708026	0.0863647470863622	0.0483194259113317	AURKB	1	BP
GO:0048193	Golgi vesicle transport	2/18	304/17910	0.0367369665731927	0.0865096309626796	0.0484004856719822	KIF23/KIF4A	2	BP							GO:0048193	Golgi vesicle transport	2/18	304/17910	0.0367369665731927	0.0865096309626796	0.0484004856719822	KIF23/KIF4A	2	BP
GO:0042769	DNA damage response, detection of DNA damage	1/18	38/17910	0.0375274214646216	0.0878045438114544	0.0491249646702874	DTL	1	BP							GO:0042769	DNA damage response, detection of DNA damage	1/18	38/17910	0.0375274214646216	0.0878045438114544	0.0491249646702874	DTL	1	BP
GO:0047496	vesicle transport along microtubule	1/18	38/17910	0.0375274214646216	0.0878045438114544	0.0491249646702874	KIF23	1	BP							GO:0047496	vesicle transport along microtubule	1/18	38/17910	0.0375274214646216	0.0878045438114544	0.0491249646702874	KIF23	1	BP
GO:0071214	cellular response to abiotic stimulus	2/18	310/17910	0.0380690109879063	0.0885043886024573	0.04951651445963	AURKB/CDC25A	2	BP							GO:0071214	cellular response to abiotic stimulus	2/18	310/17910	0.0380690109879063	0.0885043886024573	0.04951651445963	AURKB/CDC25A	2	BP
GO:0104004	cellular response to environmental stimulus	2/18	310/17910	0.0380690109879063	0.0885043886024573	0.04951651445963	AURKB/CDC25A	2	BP							GO:0104004	cellular response to environmental stimulus	2/18	310/17910	0.0380690109879063	0.0885043886024573	0.04951651445963	AURKB/CDC25A	2	BP
GO:0016893	endonuclease activity, active with either ribo- or deoxyribonucleic acids and producing 5'-phosphomonoesters	1/18	39/16967	0.040595832868225	0.08879520590693	0.0457805572882131	EXO1	1	MF							GO:0016893	endonuclease activity, active with either ribo- or deoxyribonucleic acids and producing 5'-phosphomonoesters	1/18	39/16967	0.040595832868225	0.08879520590693	0.0457805572882131	EXO1	1	MF
GO:0042578	phosphoric ester hydrolase activity	2/18	305/16967	0.0407733088348148	0.08879520590693	0.0457805572882131	CDC25A/DLGAP5	2	MF							GO:0042578	phosphoric ester hydrolase activity	2/18	305/16967	0.0407733088348148	0.08879520590693	0.0457805572882131	CDC25A/DLGAP5	2	MF
GO:0006470	protein dephosphorylation	2/18	313/17910	0.0387420554597945	0.0897831761449206	0.0502319716571437	CDC25A/DLGAP5	2	BP							GO:0006470	protein dephosphorylation	2/18	313/17910	0.0387420554597945	0.0897831761449206	0.0502319716571437	CDC25A/DLGAP5	2	BP
GO:0004536	deoxyribonuclease activity	1/18	41/16967	0.0426351290795687	0.0908313619521246	0.0468303477304187	EXO1	1	MF							GO:0004536	deoxyribonuclease activity	1/18	41/16967	0.0426351290795687	0.0908313619521246	0.0468303477304187	EXO1	1	MF
GO:0007129	synapsis	1/18	40/17910	0.0394652310374595	0.090882077783424	0.0508467861282892	TRIP13	1	BP							GO:0007129	synapsis	1/18	40/17910	0.0394652310374595	0.090882077783424	0.0508467861282892	TRIP13	1	BP
GO:0019985	translesion synthesis	1/18	40/17910	0.0394652310374595	0.090882077783424	0.0508467861282892	DTL	1	BP							GO:0019985	translesion synthesis	1/18	40/17910	0.0394652310374595	0.090882077783424	0.0508467861282892	DTL	1	BP
GO:0043168	anion binding	6/18	2573/16967	0.0438211180531669	0.0913716929619225	0.0471089287021727	KIF23/KIF4A/TRIP13/AURKA/AURKB/BUB1	6	MF							GO:0043168	anion binding	6/18	2573/16967	0.0438211180531669	0.0913716929619225	0.0471089287021727	KIF23/KIF4A/TRIP13/AURKA/AURKB/BUB1	6	MF
GO:0051445	regulation of meiotic cell cycle	1/18	41/17910	0.0404327534684237	0.0928173271444946	0.0519295211709645	CDC20	1	BP							GO:0051445	regulation of meiotic cell cycle	1/18	41/17910	0.0404327534684237	0.0928173271444946	0.0519295211709645	CDC20	1	BP
GO:0016796	exonuclease activity, active with either ribo- or deoxyribonucleic acids and producing 5'-phosphomonoesters	1/18	44/16967	0.0456863988776186	0.0932763977084713	0.048090946186967	EXO1	1	MF							GO:0016796	exonuclease activity, active with either ribo- or deoxyribonucleic acids and producing 5'-phosphomonoesters	1/18	44/16967	0.0456863988776186	0.0932763977084713	0.048090946186967	EXO1	1	MF
GO:0019899	enzyme binding	5/18	1941/16967	0.0467797131008832	0.0935594262017664	0.048236868503596	AURKA/AURKB/BIRC5/CDC20/CDC25A	5	MF							GO:0019899	enzyme binding	5/18	1941/16967	0.0467797131008832	0.0935594262017664	0.048236868503596	AURKA/AURKB/BIRC5/CDC20/CDC25A	5	MF
GO:0016772	transferase activity, transferring phosphorus-containing groups	3/18	784/16967	0.0477826938351853	0.0936540799169631	0.0482856695597662	AURKA/AURKB/BUB1	3	MF							GO:0016772	transferase activity, transferring phosphorus-containing groups	3/18	784/16967	0.0477826938351853	0.0936540799169631	0.0482856695597662	AURKA/AURKB/BUB1	3	MF
GO:0022412	cellular process involved in reproduction in multicellular organism	2/18	326/17910	0.0417118128570443	0.0954533648452738	0.053404333900456	TRIP13/AURKA	2	BP							GO:0022412	cellular process involved in reproduction in multicellular organism	2/18	326/17910	0.0417118128570443	0.0954533648452738	0.053404333900456	TRIP13/AURKA	2	BP
GO:0008089	anterograde axonal transport	1/18	43/17910	0.0423650377441054	0.0963441668323892	0.0539027205925984	KIF4A	1	BP							GO:0008089	anterograde axonal transport	1/18	43/17910	0.0423650377441054	0.0963441668323892	0.0539027205925984	KIF4A	1	BP
GO:0099518	vesicle cytoskeletal trafficking	1/18	43/17910	0.0423650377441054	0.0963441668323892	0.0539027205925984	KIF23	1	BP							GO:0099518	vesicle cytoskeletal trafficking	1/18	43/17910	0.0423650377441054	0.0963441668323892	0.0539027205925984	KIF23	1	BP
GO:0016567	protein ubiquitination	3/18	794/17910	0.0430960365909466	0.0977021947558728	0.0546625112693276	CDC20/CDCA3/DTL	3	BP							GO:0016567	protein ubiquitination	3/18	794/17910	0.0430960365909466	0.0977021947558728	0.0546625112693276	CDC20/CDCA3/DTL	3	BP
GO:0007140	male meiotic nuclear division	1/18	44/17910	0.0433298012366112	0.0979280337545703	0.0547888638742225	TRIP13	1	BP							GO:0007140	male meiotic nuclear division	1/18	44/17910	0.0433298012366112	0.0979280337545703	0.0547888638742225	TRIP13	1	BP
GO:0033365	protein localization to organelle	3/18	798/17910	0.0436418111427012	0.0983287720190489	0.0550130692766993	AURKA/AURKB/GTSE1	3	BP							GO:0033365	protein localization to organelle	3/18	798/17910	0.0436418111427012	0.0983287720190489	0.0550130692766993	AURKA/AURKB/GTSE1	3	BP
GO:0048609	multicellular organismal reproductive process	3/18	801/17910	0.0440534887132068	0.0989509131096646	0.055361145330281	TRIP13/ASF1B/AURKA	3	BP							GO:0048609	multicellular organismal reproductive process	3/18	801/17910	0.0440534887132068	0.0989509131096646	0.055361145330281	TRIP13/ASF1B/AURKA	3	BP
