# Supplementary figures and images for: PLK1 overexpression as a dual-role biomarker and therapeutic vulnerability in pulmonary adenocarcinoma
Source: PeerJ journal article supplement (doi:10.7717/peerj.20618), 2026-01-15

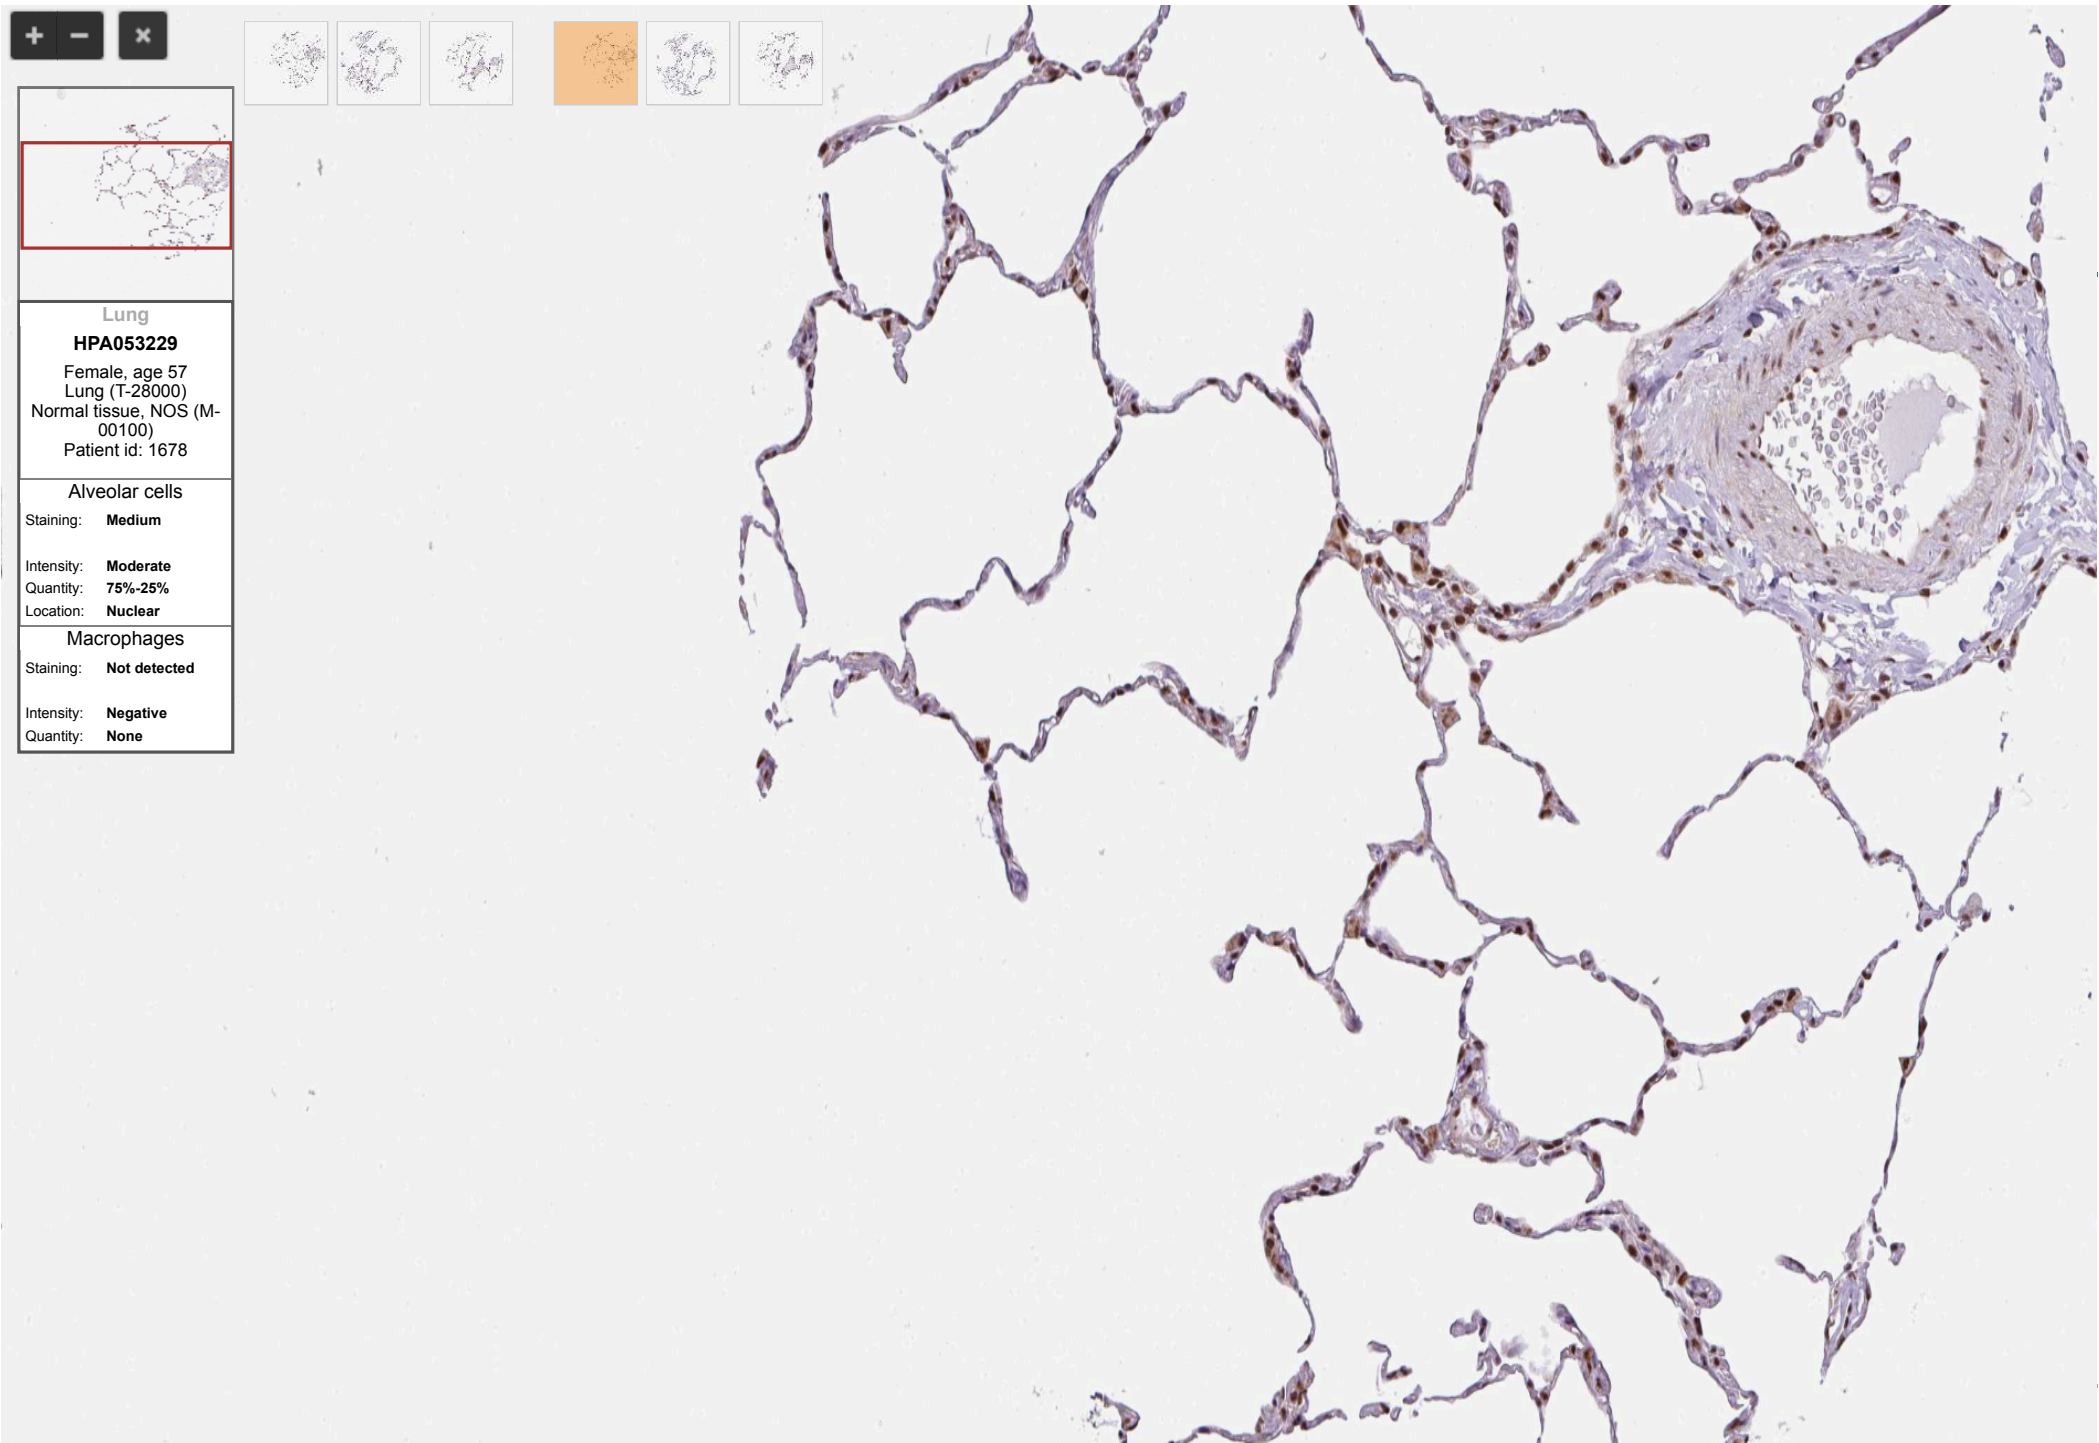

Supplement: additional_files.tar [file Figure 1F Tissue expression of PLK1 - Staining in lung - The Human Protein Atlas.pdf › additional files/Figure 1F Tissue expression of PLK1 - Staining in lung - The Human Protein Atlas.pdf]

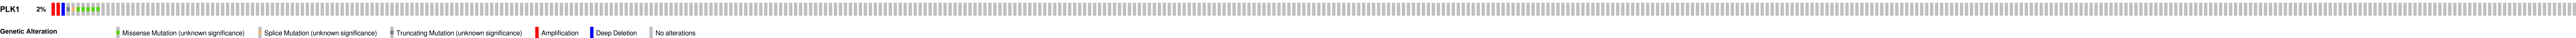

Supplement: additional_files.tar [file Figure 1G oncoprint.pdf › additional files/Figure 1G oncoprint.pdf]
